# Supplementary material
Source: Research Square preprint supplement (doi:10.21203/rs.3.rs-10082654/v1)
Supplement: Supplementary file 1 [file 9239c22d855d753d3e1524e2.pdf]

1 **Synergistic Catalysis Enables Chemoselective Asymmetric**

2 **Carbene N–H Insertion of Functionalized Anilines**

3  
4 *Shingo Harada,\*<sup>1</sup> Tasuki Sakai,<sup>1,2</sup> Maika Furutani,<sup>1,2</sup> and Tetsuhiro Nemoto\*<sup>1</sup>*

5 *<sup>1</sup>Graduate School of Pharmaceutical Sciences, Chiba University, 1-8-1, Inohana, Chuo-*  
6 *ku, Chiba 260-8675, Japan*

7 *<sup>2</sup>These authors contributed equally: Maika Furutani, Tasuki Sakai.*

8 *e-mail: Sharada@chiba-u.jp; tnemoto@faculty.chiba-u.jp*

9 ***Table of Contents***

|    |                                                                         |             |
|----|-------------------------------------------------------------------------|-------------|
| 10 | <b>1. General Information</b>                                           | <b>S2</b>   |
| 11 | <b>2. Additional Studies</b>                                            | <b>S3</b>   |
| 12 | <b>3. General Procedure for Ru-Catalyzed Asymmetric N–H Insertion</b>   | <b>S7</b>   |
| 13 | <b>4. General Procedure for Light-promoted Asymmetric N–H Insertion</b> | <b>S47</b>  |
| 14 | <b>5. Deuterium Labelling Experiment</b>                                | <b>S56</b>  |
| 15 | <b>6. Synthesis of Catalyst and Substrates</b>                          | <b>S59</b>  |
| 16 | <b>7. Single-Crystal X-Ray Diffraction Analysis</b>                     | <b>S70</b>  |
| 17 | <b>8. Computational Details</b>                                         | <b>S75</b>  |
| 18 | <b>9. Copy of NMR and HPLC Spectra</b>                                  | <b>S184</b> |
| 19 | <b>10. References</b>                                                   | <b>S298</b> |

1    **1.       General Information**

2    NMR spectra were recorded on a JEOL ECZ400 spectrometer and a JEOL ECS600  
3    spectrometer. Chemical shifts are reported in ppm relative to tetramethylsilane (TMS,  $\delta$   
4    = 0.00 ppm) as an internal standard in  $\text{CDCl}_3$ . Data are reported as follows: chemical shift,  
5    multiplicity (s = singlet, d = doublet, t = triplet, q = quartet, m = multiplet, and br = broad),  
6    integration and coupling constants in Hz. ESI mass spectra were measured on JEOL  
7    AccuTOF LC-plus JMS-T100LP. Optical rotations were measured on a JASCO P-1020  
8    polarimeter. The enantiomeric ratio (er) was determined by HPLC analysis. HPLC was  
9    performed on JASCO HPLC systems consisting of the following: pump, PU-980; detector,  
10   UV-970; column DAICEL CHIRALPAK IC-3, CHIRALPAK IG-3, CHIRALPAK IBN-  
11   3; mobile phase, *n*-hexane/IPA. Melting points were measured with a SIBATA NEL-270  
12   melting point apparatus. Analytical thin layer chromatography was performed on  
13   Kieselgel 60F<sub>254</sub>, 0.25 mm thickness plates. Column chromatography was performed with  
14   silica gel 60 N (spherical, neutral 63-210 mesh). Reactions were conducted in dry solvent.  
15   Other reagents were purified by the standard methods.

1 **2. Additional Studies**

2 **Supplementary Table 1. Examination of catalysts and solvents.**

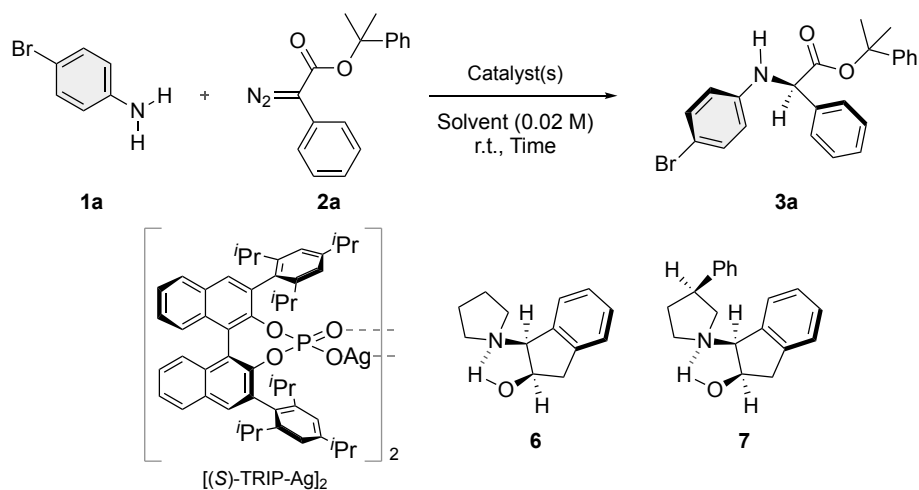

3

| Entry | Catalyst(s) (mol%)                                                                   | Solvent                  | Time (h) | Yield (%) | e.r.  |
|-------|--------------------------------------------------------------------------------------|--------------------------|----------|-----------|-------|
| 1     | $[(S)\text{-TRIP-Ag}]_2$ (2)                                                         | toluene                  | 5        | 63        | 44:56 |
| 2     | $\text{Cu}(\text{OTf})_2$ (2) & <b>6</b> (2)                                         | toluene                  | 5        | 64        | 50:50 |
| 3     | $\text{Rh}_2(\text{NHCO}^i\text{Bu})_4$ (2) & <b>6</b> (2)                           | toluene                  | 24       | 27        | 84:16 |
| 4     | $\text{Cp}_2\text{HfCl}_2$ (2) & <b>6</b> (2)                                        | toluene                  | 5        | 0         | -     |
| 5     | $\text{RuCl}(p\text{-cymene})[(S,S)\text{-Ts-dpen}]$ (2) & <b>6</b> (2)              | toluene                  | 24       | trace     | 82:18 |
| 6     | $[\text{Ru}(p\text{-cymene})\text{Cl}_2]_2$ (2), $\text{AgSbF}_6$ (2) & <b>6</b> (2) | toluene                  | 24       | 47        | 81:19 |
| 7     | $\text{Cp}^*\text{RuCl}(\text{cod})$ (2) & <b>6</b> (2)                              | toluene                  | 24       | 47        | 56:44 |
| 8     | $\text{Cp}^*\text{RuCl}(\text{PPh}_3)_2$ (2) & <b>6</b> (2)                          | toluene                  | 5        | 15        | 79:21 |
| 9     | $[\text{Ru}(p\text{-cymene})\text{Cl}_2]_2$ (2) & <b>6</b> (2)                       | PhCl                     | 5        | 94        | 93:7  |
| 10    | $[\text{Ru}(p\text{-cymene})\text{Cl}_2]_2$ (2) & <b>6</b> (2)                       | $\text{CH}_2\text{Cl}_2$ | 5        | 91        | 94:6  |
| 11    | $[\text{Ru}(p\text{-cymene})\text{Cl}_2]_2$ (2) & <b>7</b> (5)                       | $\text{CH}_2\text{Cl}_2$ | 5        | 99        | 97:3  |

4

1 **Supplementary Table 2.** Optimization of the ratio of metal catalyst to organocatalyst.

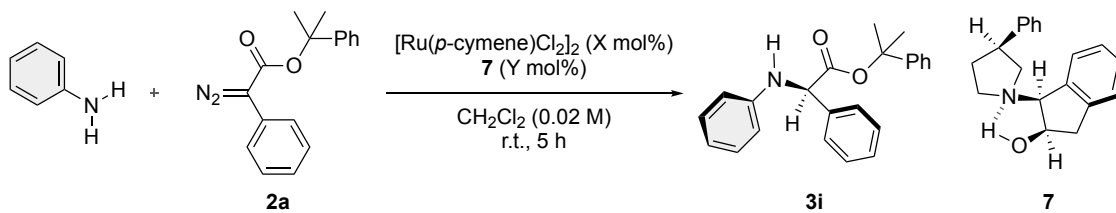

| Entry | X | Y | Yield (%) | e.r.  |
|-------|---|---|-----------|-------|
| 1     | 2 | 2 | 90        | 73:27 |
| 2     | 5 | 5 | 90        | 93:7  |
| 3     | 3 | 4 | 92        | 90:10 |
| 4     | 5 | 2 | 94        | 78:22 |

3

4 **Supplementary Table 3.** Almost no time dependence of enantioselectivity.

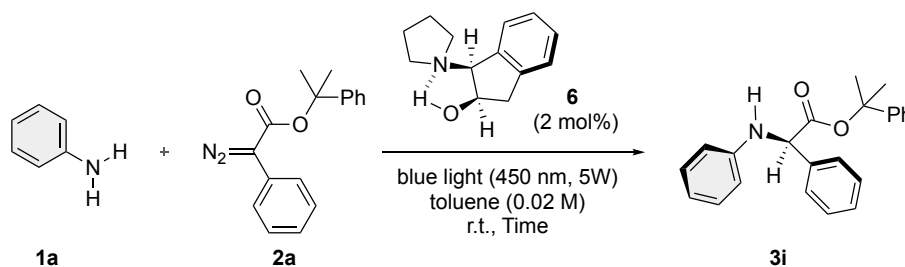

| Entry | Time   | Yield (%) | e.r.  |
|-------|--------|-----------|-------|
| 1     | 15 min | 35        | 88:12 |
| 2     | 30 min | 55        | 88:12 |
| 3     | 1      | 60        | 87:13 |
| 4     | 2      | 49        | 90:10 |
| 5     | 5      | 45        | 90:10 |

6

1 **Supplementary Table 4.** Investigation of base identity and substrate ratio using *N*-  
 2 tosylhydrazone.

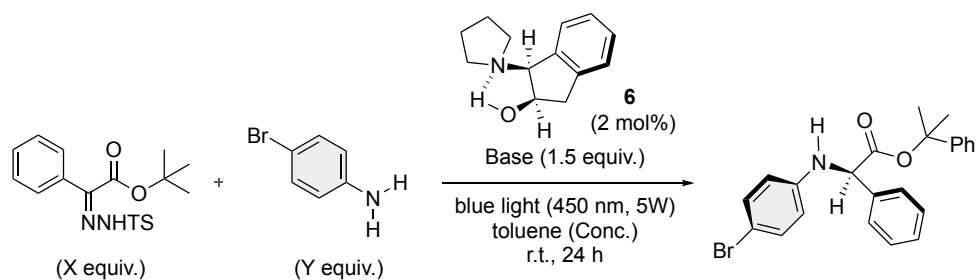

3  
 4

| Entry | X<br>(equiv.) | Y<br>(equiv.) | Base                            | Conc.<br>(M) | Yield<br>(%) | e.r.  |
|-------|---------------|---------------|---------------------------------|--------------|--------------|-------|
| 1     | 1             | 3             | Cs <sub>2</sub> CO <sub>3</sub> | 0.02         | <60          | 58:42 |
| 2     | 1             | 3             | K <sub>2</sub> CO <sub>3</sub>  | 0.02         | <52          | 71:29 |
| 3     | 1             | 3             | NaO <sup>t</sup> Bu             | 0.02         | <49          | 53:47 |
| 4     | 1             | 4             | Et <sub>3</sub> N               | 0.02         | 59           | 50:50 |
| 5     | 1             | 1             | K <sub>2</sub> CO <sub>3</sub>  | 0.02         | 25           | 59:41 |
| 6     | 1.5           | 1             | K <sub>2</sub> CO <sub>3</sub>  | 0.02         | 43           | 63:37 |
| 7     | 1             | 4             | K <sub>2</sub> CO <sub>3</sub>  | 0.02         | 57           | 64:36 |
| 8     | 1             | 4             | K <sub>2</sub> CO <sub>3</sub>  | 0.02         | 35           | 67:33 |
| 9     | 1             | 4             | K <sub>2</sub> CO <sub>3</sub>  | 0.02         | 21           | 53:47 |
| 10    | 1             | 4             | K <sub>2</sub> CO <sub>3</sub>  | 0.05         | 43           | 61:39 |
| 11    | 1             | 4             | K <sub>2</sub> CO <sub>3</sub>  | 0.10         | 77           | 56:44 |

5  
 6

1 **Supplementary Table 5.** Examination of light sources.

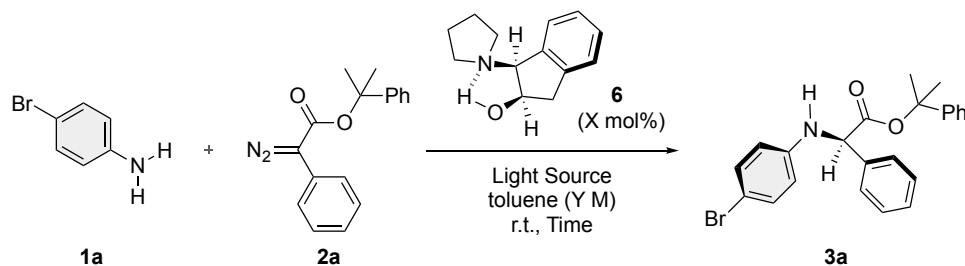

2

| Entry | Light Source   | X (mol %) | Y (M) | Time | Yield (%) | e.r.  |
|-------|----------------|-----------|-------|------|-----------|-------|
| 1     | 450 nm, 5 W×1  | 10        | 0.02  | 5    | 56        | 92:8  |
| 2     | 450 nm, 5 W×1  | 2         | 0.05  | 5    | 62        | 93:7  |
| 3     | 450 nm, 5 W×1  | 2         | 0.10  | 5    | 71        | 90:10 |
| 4     | 450 nm, 5 W×1  | 2         | 0.20  | 5    | 80        | 86:14 |
| 5     | 520 nm, 5 W×1  | 2         | 0.02  | 48   | 48        | 94:6  |
| 6     | 365 nm, 2 W×4  | 2         | 0.02  | 24   | 31        | 92:8  |
| 7     | 450 nm, 30 W×1 | 2         | 0.02  | 1.5  | 52        | 92:8  |

3

4 **Supplementary Figure 1.** Mechanistic experiments using deuterium labelling and water addition.

5

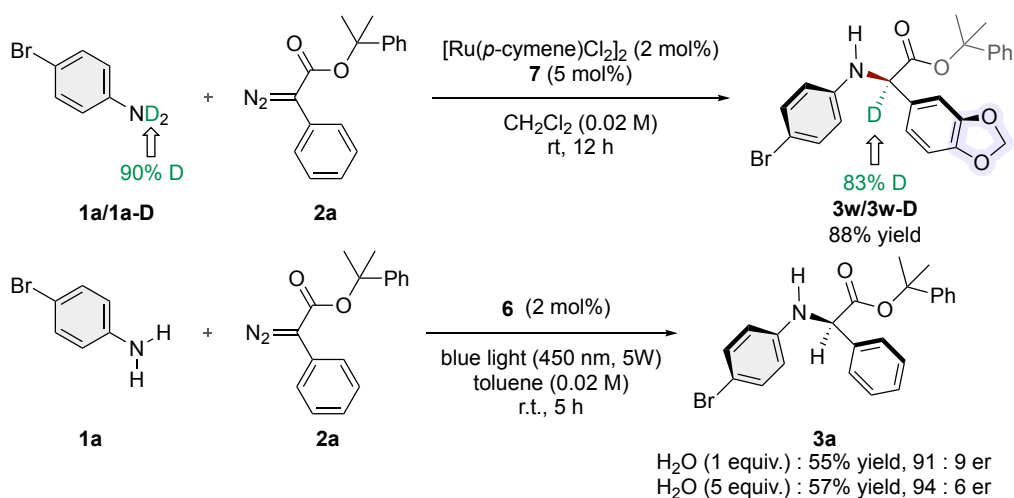

6

1 **3. General Procedure for Ru-Catalyzed Asymmetric N–H Insertion**

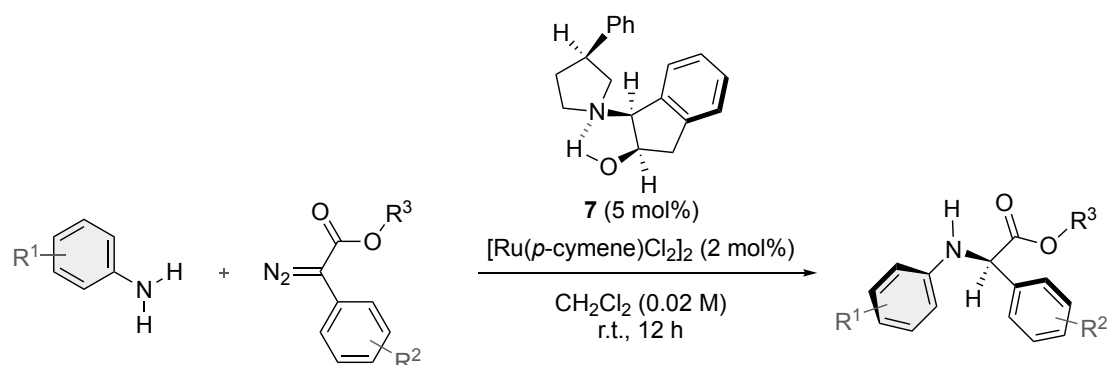

4 A pre-dried 30-mL pear-shaped flask was charged with  $[\text{Ru}(p\text{-cymene})\text{Cl}_2]_2$  (2.4 mg,  
5 0.004 mmol), chiral catalyst (**7**, 2.8 mg, 0.01 mmol), and aniline derivative (0.6 mmol).  
6 After adding  $\text{CH}_2\text{Cl}_2$  (3 mL), the mixture was stirred at room temperature under an argon  
7 atmosphere for 5 min. A solution of diazoester derivative (**2**, 0.2 mmol) in  $\text{CH}_2\text{Cl}_2$  (7 mL)  
8 was then added in one portion. The resulting mixture was stirred at room temperature for  
9 12 h. The solvent was removed under reduced pressure, and the crude residue was purified  
10 by flash column chromatography on silica gel ( $n\text{-hexane}/\text{EtOAc} = 15:1$ ) to afford the  
11 corresponding products.

12 2-phenylpropan-2-yl (*R*)-2-((4-bromophenyl)amino)-2-phenylacetate (**3a**)

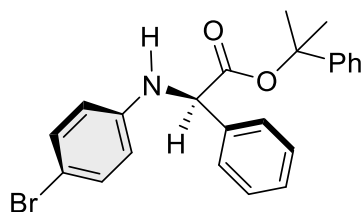

1 White solid (80.6 mg, 95% yield, 96 : 4 e.r.): m.p. 95-97 °C ;TLC Rf = 0.48 (n-  
2 hexane/EtOAc, 6/1); <sup>1</sup>H NMR (400 MHz, CDCl<sub>3</sub>) δ 7.44-7.46 (m, 2H), 7.34-7.39 (m, 3H),  
3 7.14-7.17 (m, 5H), 6.94-6.97 (m, 2H), 6.36-6.40 (m, 2H), 4.97-5.02 (m, 2H), 1.78 (s, 3H),  
4 1.60 (s, 3H); <sup>13</sup>C NMR (100 MHz, CDCl<sub>3</sub>) δ 169.8, 144.9, 144.7, 137.5, 132.0 (2C), 128.9  
5 (2C), 128.4, 128.3 (2C), 127.4, 127.3 (2C), 124.1 (2C), 115.0 (2C), 109.6, 83.7, 61.1,  
6 29.3, 27.6; IR (ATR) ν 3879, 3404, 3061, 3030, 2980, 2358, 2309, 2108, 1733, 1595  
7 cm<sup>-1</sup>; HRMS (ESI-TOF) [M + Na]<sup>+</sup> calcd for C<sub>23</sub>H<sub>22</sub>BrNNaO<sub>2</sub><sup>+</sup> m/z 446.0726, found  
8 446.0731. [α]<sub>D</sub><sup>25</sup> -92.2 (c 1.0, CHCl<sub>3</sub>). The enantiomeric ratio was determined by  
9 analytical chiral HPLC. Retention time: 7.2 min (major isomer), 14.2 min (minor isomer),  
10 IBN-3 column, 95/5 *n*-hexane/IPA, 1.0 mL/min, 254 nm.

11

12 2-phenylpropan-2-yl (*R*)-2-((4-chlorophenyl)amino)-2-phenylacetate (**3b**)

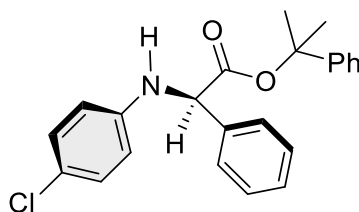

13

14 Colorless amorphous (63.8 mg, 84% yield, 95 : 5 e.r.); TLC Rf = 0.44 (n-hexane/EtOAc,  
15 6/1); <sup>1</sup>H NMR (400 MHz, CDCl<sub>3</sub>) δ 7.43-7.46 (m, 2H), 7.32-7.39 (m, 3H), 7.13-7.18 (m,  
16 3H), 7.00-7.04 (m, 2H), 6.94-6.97 (m, 2H), 6.40-6.44 (m, 2H), 4.99 (s, 2H), 1.78 (s, 3H),  
17 1.60 (s, 3H); <sup>13</sup>C NMR (100 MHz, CDCl<sub>3</sub>) δ 169.9, 144.8, 144.5, 137.6, 129.1 (2C), 128.9

1 (2C), 128.5, 128.3 (2C), 127.5 (2C) , 127.4, 124.1 (2C), 122.5, 114.6 (2C), 83.7, 61.2,  
2 29.4, 27.6; IR (ATR)  $\nu$  4020, 3405, 3062, 3030, 2981, 2935, 2351, 2319, 1734, 1601  
3  $\text{cm}^{-1}$ ; HRMS (ESI-TOF)  $[\text{M} + \text{Na}]^+$  calcd for  $\text{C}_{23}\text{H}_{22}\text{ClNNaO}_2^+$   $m/z$  402.1231, found  
4 402.1239.  $[\alpha]_D^{25}$   $-107.3$  (c 1.0,  $\text{CHCl}_3$ ). The enantiomeric ratio was determined by  
5 analytical chiral HPLC. Retention time: 5.7 min (major isomer), 9.6 min (minor isomer),  
6 IBN-3 column, 90/10 *n*-hexane/IPA, 1.0 mL/min, 254 nm.

7

8 2-phenylpropan-2-yl (*R*)-2-((4-fluorophenyl)amino)-2-phenylacetate (**3c**)

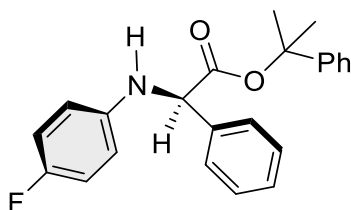

9

10 Pink solid (44.3 mg, 61% yield, 94 : 6 e.r.); m.p. 83-85 °C; TLC  $R_f$  = 0.32 (*n*-  
11 hexane/EtOAc, 10/1);  $^1\text{H}$  NMR (600 MHz,  $\text{CDCl}_3$ )  $\delta$  7.45-7.49 (m, 2H), 7.33-7.40 (m,  
12 3H), 7.15-7.20 (m, 3H), 6.95-6.99 (m, 2H), 6.78-6.83 (m, 2H), 6.43-6.47 (m, 2H), 4.98  
13 (s, 1H), 4.85 (br s, 1H), 1.78 (s, 3H), 1.61 (s, 3H);  $^{13}\text{C}$  NMR (100 MHz,  $\text{CDCl}_3$ )  $\delta$  170.1,  
14 156.0 (d,  $J$  = 235.1 Hz), 144.8, 142.4, 137.9, 128.9 (2C), 128.4, 128.3 (2C), 127.5 (2C),  
15 127.3, 124.1 (2C), 115.74 (d,  $J$  = 23.1 Hz, 2C), 114.3 (d,  $J$  = 6.7 Hz, 2C), 83.6, 61.8, 29.3,  
16 27.6;  $^{19}\text{F}$  NMR (376 MHz,  $\text{CDCl}_3$ )  $\delta$   $-127.5$  (m); IR (ATR)  $\nu$  3409, 3084, 3062, 3032,  
17 2982, 2930, 2343, 2251, 1733, 1614  $\text{cm}^{-1}$ ; HRMS (ESI-TOF)  $[\text{M} + \text{Na}]^+$  calcd for

1  $C_{23}H_{22}FNNaO_2^+$   $m/z$  386.1527, found 386.1532.  $[\alpha]^{25}_D$   $-59.8$  (c 1.0,  $CHCl_3$ ). The  
2 enantiomeric ratio was determined by analytical chiral HPLC. Retention time: 7.1 min  
3 (major isomer), 13.2 min (minor isomer), IBN-3 column, 97/3 *n*-hexane/IPA, 1.0 mL/min,  
4 254 nm.

5

6 2-phenylpropan-2-yl (*R*)-2-phenyl-2-((4-(trifluoromethyl)phenyl)amino)acetate (**3d**)

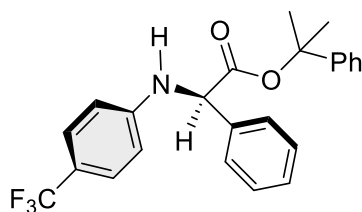

7

8 White solid (78.6 mg, 95% yield, 96 : 4 e.r.); m.p. 109-111 °C; TLC  $R_f$  = 0.44 (*n*-  
9 hexane/EtOAc, 6/1);  $^1H$  NMR (400 MHz,  $CDCl_3$ )  $\delta$  7.15-7.48 (m, 10H), 6.95-6.98 (m,  
10 2H), 6.51 (d,  $J$  = 8.2 Hz, 2H), 5.34 (d,  $J$  = 5.0 Hz, 1H), 5.06 (d,  $J$  = 5.5 Hz, 1H), 1.81 (s,  
11 3H), 1.62 (s, 3H);  $^{13}C$  NMR (100 MHz,  $CDCl_3$ )  $\delta$  169.4, 148.2, 144.5, 137.1, 128.9 (2C),  
12 128.4, 128.2 (2C), 127.3, 127.3 (2C), 126.5 (q,  $J$  = 2.9 Hz, 2C), 124.8 (q,  $J$  = 277 Hz),  
13 124.0 (2C), 119.3 (q,  $J$  = 32.5 Hz), 112.5 (2C), 83.9, 60.5, 29.2, 27.4;  $^{19}F$  NMR (376 MHz,  
14  $CDCl_3$ )  $\delta$   $-62.4$ ; IR (ATR)  $\nu$  3399, 3062, 3032, 2982, 2933, 2330, 1896, 1732, 1616, 1586  
15  $cm^{-1}$ ; HRMS (ESI-TOF)  $[M + Na]^+$  calcd for  $C_{24}H_{22}F_3NNaO_2^+$   $m/z$  436.1495, found  
16 436.1496.  $[\alpha]^{25}_D$   $-99.0$  (c 1.0,  $CHCl_3$ ). The enantiomeric ratio was determined by

1 analytical chiral HPLC. Retention time: 5.2 min (major isomer), 8.9 min (minor isomer),  
2 IBN-3 column, 90/10 *n*-hexane/IPA, 1.0 mL/min, 254 nm.

3

4 methyl (*R*)-4-((2-oxo-1-phenyl-2-((2-phenylpropan-2-yl)oxy)ethyl)amino)benzoate (**3e**)

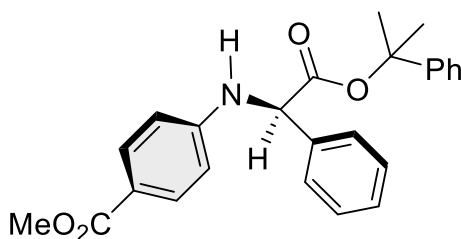

5

6 Colorless amorphous (76.7 mg, 95% yield, 96 : 4 e.r.); TLC R<sub>f</sub> = 0.24 (*n*-hexane/EtOAc,  
7 6/1); <sup>1</sup>H NMR (400 MHz, CDCl<sub>3</sub>) δ 7.78 (d, *J* = 8.7 Hz, 2H), 7.45-7.47 (m, 2H), 7.35-  
8 7.41 (m, 3H), 7.14-7.19 (m, 3H), 6.95-6.97 (m, 2H), 6.47 (d, *J* = 8.7 Hz, 2H), 5.44 (d, *J*  
9 = 5.5 Hz, 1H), 5.09 (d, *J* = 5.5 Hz, 1H), 3.80 (s, 3H), 1.80 (s, 3H), 1.61 (s, 3H); <sup>13</sup>C NMR  
10 (100 MHz, CDCl<sub>3</sub>) δ 169.5, 167.3, 149.6, 144.6, 137.2, 131.5 (2C), 129.0 (2C), 128.5,  
11 128.3 (2C), 127.4 (3C), 124.1 (2C), 119.1, 112.4 (2C), 84.0, 60.5, 51.6, 29.3, 27.5; IR  
12 (ATR) ν 3388, 3063, 2982, 2948, 2362, 1735, 1707, 1606, 1525, 1496 cm<sup>-1</sup>; HRMS (ESI-  
13 TOF) [M + Na]<sup>+</sup> calcd for C<sub>25</sub>H<sub>25</sub>NNaO<sub>4</sub><sup>+</sup> *m/z* 426.1676, found 426.1678. [α]<sub>D</sub><sup>25</sup> -113.2  
14 (c 1.0, CHCl<sub>3</sub>). The enantiomeric ratio was determined by analytical chiral HPLC.  
15 Retention time: 12.6 min (major isomer), 14.8 min (minor isomer), IBN-3 column, 90/10  
16 *n*-hexane/IPA, 1.0 mL/min, 254 nm.

1

2 2-phenylpropan-2-yl (*R*)-2-((4-acetylphenyl)amino)-2-phenylacetate (**3f**)

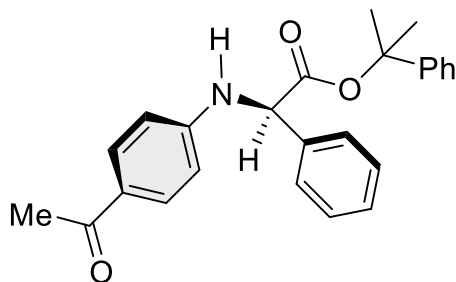

3

4 Colorless amorphous (72.8 mg, 94% yield, 97 : 3 e.r.); TLC R<sub>f</sub> = 0.16 (n-hexane/EtOAc,

5 6/1); <sup>1</sup>H NMR (400 MHz, CDCl<sub>3</sub>) δ 7.73 (d, *J* = 8.7 Hz, 2H), 7.45-7.47 (m, 2H), 7.35-

6 7.41 (m, 3H), 7.14-7.19 (m, 3H), 6.94-6.97 (m, 2H), 6.48 (d, *J* = 8.7 Hz, 2H), 5.53 (d, *J*

7 = 5.0 Hz, 1H), 5.10 (d, *J* = 6.0 Hz, 1H), 2.44 (s, 3H), 1.81 (s, 3H), 1.61 (s, 3H); <sup>13</sup>C NMR

8 (100 MHz, CDCl<sub>3</sub>) δ 196.5, 169.4, 149.8, 144.6, 137.1, 130.7 (2C), 129.0 (2C), 128.6,

9 128.3 (2C), 127.4, 127.4 (2C), 127.3, 124.1 (2C), 112.4 (2C), 84.1, 60.4, 29.4, 27.5, 26.1;

10 IR (ATR) ν 3388, 3060, 2982, 2361, 2329, 1735, 1663, 1598, 1525, 1495 cm<sup>-1</sup>; HRMS

11 (ESI-TOF) [M + Na]<sup>+</sup> calcd for C<sub>25</sub>H<sub>25</sub>NNaO<sub>3</sub><sup>+</sup> m/z 410.1727, found 410.1728. [α]<sub>D</sub><sup>25</sup> –

12 121.8 (c 1.0, CHCl<sub>3</sub>). The enantiomeric ratio was determined by analytical chiral HPLC.

13 Retention time: 16.3 min (major isomer), 19.6 min (minor isomer), IG-3 column, 90/10

14 *n*-hexane/IPA, 1.0 mL/min, 254 nm.

15

16 2-phenylpropan-2-yl (*R*)-2-((4-nitrophenyl)amino)-2-phenylacetate (**3g**)

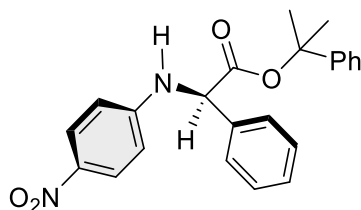

1

2 Yellow amorphous (58.6 mg, 75% yield, 96 : 4 e.r.); TLC R<sub>f</sub> = 0.32 (n-hexane/EtOAc,

3 6/1); <sup>1</sup>H NMR (400 MHz, CDCl<sub>3</sub>) δ 7.96-8.00 (m, 2H), 7.38-7.45 (m, 5H), 7.14-7.20 (m,

4 3H), 6.94-6.97 (m, 2H), 6.42-6.46 (m, 2H), 5.82 (d, *J* = 5.0 Hz, 1H), 5.10 (d, *J* = 5.5 Hz,

5 1H), 1.81 (s, 3H), 1.61 (s, 3H); <sup>13</sup>C NMR (100 MHz, CDCl<sub>3</sub>) δ 169.0, 150.9, 144.4, 138.7,

6 136.4, 129.2 (2C), 128.9, 128.4 (2C), 127.5, 127.3 (2C), 126.3 (2C), 124.1 (2C), 112.2

7 (2C), 84.4, 60.4, 29.4, 27.4; IR (ATR) ν 3382, 3063, 3029, 2982, 2932, 2360, 2353, 2330,

8 1733, 1599 cm<sup>-1</sup>; HRMS (ESI-TOF) [M + Na]<sup>+</sup> calcd for C<sub>23</sub>H<sub>22</sub>N<sub>2</sub>NaO<sub>4</sub><sup>+</sup> m/z 413.1472,

9 found 413.1475. [α]<sub>D</sub><sup>25</sup> -131.0 (c 1.0, CHCl<sub>3</sub>). The enantiomeric ratio was determined by

10 analytical chiral HPLC. Retention time: 14.5 min (major isomer), 24.1 min (minor

11 isomer), IBN-3 column, 85/15 *n*-hexane/IPA, 1.0 mL/min, 254 nm.

12

13 2-phenylpropan-2-yl (R)-2-((4-cyanophenyl)amino)-2-phenylacetate (**3h**)

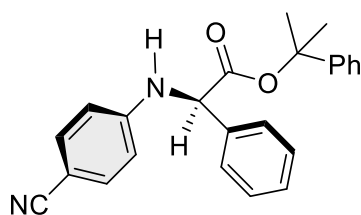

14

1 Colorless amorphous (62.2 mg, 84% yield, 76 : 24 e.r.): TLC Rf = 0.41 (n-hexane/EtOAc,  
2 4/1); <sup>1</sup>H NMR (400 MHz, CDCl<sub>3</sub>) δ 7.31-7.45 (m, 7H), 7.14-7.21 (m, 3H), 6.93-6.96 (m,  
3 2H), 6.45-6.47 (m, 2H), 5.55 (d, *J* = 4.8 Hz, 1H), 5.05 (d, *J* = 4.8 Hz, 1H), 1.80 (s, 3H),  
4 1.60 (s, 3H); <sup>13</sup>C NMR (100 MHz, CDCl<sub>3</sub>) δ 169.2, 149.0, 144.5, 136.7, 133.7 (2C), 129.1  
5 (2C), 128.8, 128.3 (2C), 127.5, 127.3 (2C), 124.1 (2C), 120.3, 113.2 (2C), 99.6, 84.2,  
6 60.3, 29.4, 27.5; IR (ATR) ν 3385, 2981, 2214, 1736, 1607, 1523, 1496, 1452, 1385, 1367  
7 cm<sup>-1</sup>; HRMS (ESI-TOF) [M + Na]<sup>+</sup> calcd for C<sub>24</sub>H<sub>22</sub>N<sub>2</sub>NaO<sub>2</sub><sup>+</sup> m/z 393.1573, found  
8 393.1579. [α]<sub>D</sub><sup>25</sup> -44.6 (c 0.56, CHCl<sub>3</sub>). The enantiomeric ratio was determined by  
9 analytical chiral HPLC. Retention time: 14.1 min (major isomer), 23.9 min (minor  
10 isomer), IBN-3 column, 85/15 *n*-hexane/IPA, 1.0 mL/min, 254 nm.

11

12 2-phenylpropan-2-yl (*R*)-2-phenyl-2-(phenylamino)acetate (**3i**)

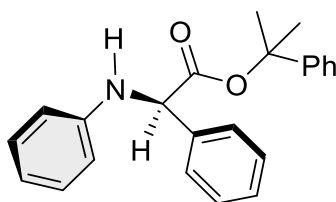

13

14 White solid (53.2 mg, 77% yield, 97 : 3 e.r.); m.p. 105-107 °C; TLC Rf = 0.36 (n-  
15 hexane/EtOAc, 8/1); <sup>1</sup>H NMR (400 MHz, CDCl<sub>3</sub>) δ 7.43-7.46 (m, 2H), 7.34-7.40 (m, 3H),  
16 7.14-7.19 (m, 5H), 6.94-6.98 (m, 2H), 6.36-6.40 (m, 2H), 4.98-5.02 (m, 2H), 1.79 (s, 3H),  
17 1.60 (s, 3H); <sup>13</sup>C NMR (100 MHz, CDCl<sub>3</sub>) δ 170.1, 146.1, 144.9, 138.1, 129.3 (2C), 128.9

1 (2C), 128.3 (3C), 127.5 (2C), 127.3, 124.1 (2C), 117.9, 113.5 (2C), 83.5, 61.2, 29.3, 27.7;  
2 IR (ATR)  $\nu$  3409, 3063, 3028, 2981, 2933, 2359, 1733, 1595, 1496, 1450  $\text{cm}^{-1}$ ; HRMS  
3 (ESI-TOF)  $[\text{M} + \text{Na}]^+$  calcd for  $\text{C}_{23}\text{H}_{23}\text{NNaO}_2^+$   $m/z$  368.1621, found 368.1620;  $[\alpha]_D^{25} -$   
4 26.7 (c 1.0,  $\text{CHCl}_3$ ). The enantiomeric ratio was determined by analytical chiral HPLC.  
5 Retention time: 8.4 min (major isomer), 11.1 min (minor isomer), IBN-3 column, 97/3 *n*-  
6 hexane/IPA, 1.0 mL/min, 254 nm.

7

8 2-phenylpropan-2-yl (R)-2-phenyl-2-(*o*-tolylamino)acetate (**3j**)

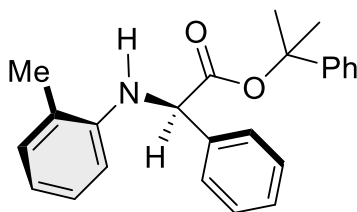

9

10 Yellow solid (54.6 mg, 76% yield, 97 : 3 e.r.); TLC  $R_f$  = 0.52 (*n*-hexane/EtOAc, 6/1);  $^1\text{H}$   
11 NMR (400 MHz,  $\text{CDCl}_3$ )  $\delta$  7.48-7.52 (m, 2H), 7.33-7.41 (m, 3H), 7.14-7.19 (m, 3H),  
12 7.03 (d,  $J$  = 7.2 Hz, 1H), 6.92-6.99 (m, 3H), 6.61 (t,  $J$  = 7.2 Hz, 1H), 6.34 (d,  $J$  = 8.0 Hz,  
13 1H), 5.09 (d,  $J$  = 5.2 Hz, 1H), 4.92 (d,  $J$  = 5.2 Hz, 1H), 2.21 (s, 3H), 1.80 (s, 3H), 1.61 (s,  
14 3H);  $^{13}\text{C}$  NMR (150 MHz,  $\text{CDCl}_3$ )  $\delta$  170.1, 144.7, 143.9, 138.0, 130.1, 128.7 (2C), 128.2  
15 (2C), 128.1, 127.3 (2C), 127.1, 126.9, 123.9 (2C), 122.3, 117.3, 110.6, 83.4, 61.0, 29.4,  
16 27.3, 17.4; IR (ATR)  $\nu$  3828, 3425, 3060, 3030, 2980, 2931, 2358, 2329, 2319, 2108  
17  $\text{cm}^{-1}$ ; HRMS (ESI-TOF)  $[\text{M} + \text{Na}]^+$  calcd for  $\text{C}_{24}\text{H}_{25}\text{NNaO}_2^+$   $m/z$  382.1778, found

1 382.1770.  $[\alpha]_{\text{D}}^{25}$   $-61.5$  (c 0.47,  $\text{CHCl}_3$ ). The enantiomeric ratio was determined by  
2 analytical chiral HPLC. Retention time: 7.2 min (minor isomer), 16.5 min (major isomer),  
3 IBN-3 column, 99/1 *n*-hexane/IPA, 1.0 mL/min, 254 nm.

4

5 2-phenylpropan-2-yl (*R*)-2-phenyl-2-(*p*-tolylamino)acetate (**3k**)

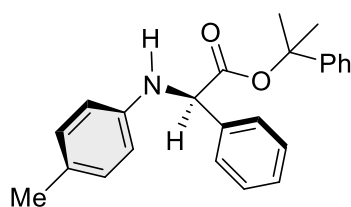

7 Colorless oil (51.0 mg, 71% yield, 93 : 7 e.r.); TLC  $R_f$  = 0.32 (*n*-hexane/EtOAc, 10/1);  
8  $^1\text{H}$  NMR (400 MHz,  $\text{CDCl}_3$ )  $\delta$  7.46-7.49 (m, 2H), 7.30-7.38 (m, 3H), 7.13-7.18 (m, 3H),  
9 6.96-6.99 (m, 2H), 6.90 (d,  $J$  = 8.2 Hz, 2H), 6.43-6.46 (m, 2H), 5.02 (s, 1H), 4.80 (s, 1H),  
10 2.18 (s, 3H), 1.78 (s, 3H), 1.61 (s, 3H);  $^{13}\text{C}$  NMR (100 MHz,  $\text{CDCl}_3$ )  $\delta$  170.2, 144.9,  
11 143.8, 138.2, 129.8 (2C), 128.8 (2C), 128.3 (2C), 128.2, 127.5 (2C), 127.2, 127.0, 124.1  
12 (2C), 113.6 (2C), 83.4, 61.5, 29.3, 27.7, 20.5; IR (ATR)  $\nu$  3412, 3019, 2987, 2974, 2340,  
13 2361, 1735, 1617, 1522, 1494  $\text{cm}^{-1}$ ; HRMS (ESI-TOF)  $[\text{M} + \text{Na}]^+$  calcd for  
14  $\text{C}_{24}\text{H}_{25}\text{NNaO}_2^+$   $m/z$  382.1778, found 382.1776.  $[\alpha]_{\text{D}}^{25}$   $-84.5$  (c 1.0,  $\text{CHCl}_3$ ). The  
15 enantiomeric ratio was determined by analytical chiral HPLC. Retention time: 15.2 min  
16 (major isomer), 18.1 min (minor isomer), IG-3 column, 95/5 *n*-hexane/IPA, 1.0 mL/min,  
17 254 nm.

1

2 2-phenylpropan-2-yl (*R*)-2-((3-methoxyphenyl)amino)-2-phenylacetate (**3l**)

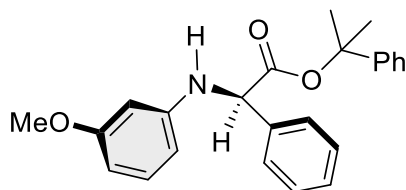

3

4 Colorless oil (72.8 mg, 97% yield, 92 : 8 e.r.); TLC R<sub>f</sub> = 0.20 (n-hexane/EtOAc, 6/1); <sup>1</sup>H

5 NMR (600 MHz, CDCl<sub>3</sub>) δ 7.47-7.49 (m, 2H), 7.32-7.39 (m, 3H), 7.15-7.19 (m, 3H),

6 6.96-7.02 (m, 3H), 6.24 (dd, *J* = 8.1, 2.1 Hz, 1H), 6.15 (dd, *J* = 7.8, 2.4 Hz, 1H), 6.07 (t,

7 *J* = 2.4 Hz, 1H), 5.03 (d, *J* = 6.0 Hz, 1H), 4.98 (d, *J* = 6.0 Hz, 1H), 3.69 (s, 3H), 1.78 (s,

8 3H), 1.61 (s, 3H); <sup>13</sup>C NMR (100 MHz, CDCl<sub>3</sub>) δ 170.1, 160.7, 147.4, 144.9, 138.1, 130.0,

9 128.9 (2C), 128.3 (3C), 127.5 (2C) , 127.3, 124.1 (2C) ,106.5, 103.1, 99.5, 83.5, 61.2,

10 55.1, 29.3, 27.6; IR (ATR) ν 3839, 3791, 3735, 3648, 3404, 2979, 2359, 2328, 1736, 1614

11 cm<sup>-1</sup>; HRMS (ESI-TOF) [M + Na]<sup>+</sup> calcd for C<sub>24</sub>H<sub>25</sub>NNaO<sub>3</sub><sup>+</sup> m/z 398.1727, found

12 398.1731. [α]<sub>D</sub><sup>25</sup> -83.1 (c 1.0, CHCl<sub>3</sub>). The enantiomeric ratio was determined by

13 analytical chiral HPLC. Retention time: 9.6 min (major isomer), 14.9 min (minor isomer),

14 IBN-3 column, 95/5 *n*-hexane/IPA, 1.0 mL/min, 254 nm.

15

16 2-phenylpropan-2-yl (*R*)-2-((3-bromophenyl)amino)-2-phenylacetate (**3m**)

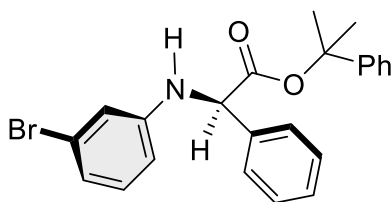

1

2 Colorless oil (80.6 mg, 95% yield, 96 : 4 e.r.); TLC Rf = 0.33 (n-hexane/EtOAc, 6/1);  $^1\text{H}$

3 NMR (400 MHz,  $\text{CDCl}_3$ )  $\delta$  7.45-7.46 (m, 2H), 7.33-7.40 (m, 3H), 7.14-7.19 (m, 3H),

4 6.96-6.98 (m, 2H), 7.06 (d,  $J = 7.3$  Hz, 1H) 6.97-6.99 (m, 3H), 6.92 (t,  $J = 16.0$  Hz, 1H),

5 6.76-6.78 (m, 1H), 6.66 (t,  $J = 3.7$  Hz, 1H) 6.41 (dd,  $J = 8.2$  Hz, 2.3 Hz, 1H), 4.99-5.04

6 (m, 2H), 1.78 (s, 3H), 1.61 (s, 3H);  $^{13}\text{C}$  NMR (100 MHz,  $\text{CDCl}_3$ )  $\delta$  169.8, 147.3, 144.7,

7 137.4, 129.0 (2C), 130.6, 128.5, 128.3 (2C), 127.4 (2C), 127.3, 124.1 (2C), 123.2, 120.7,

8 116.1, 112.1, 83.8, 61.0, 29.3, 27.6; IR (ATR)  $\nu$  3785, 3566, 3399, 3063, 3029, 2981,

9 2930, 2367, 2327, 1733  $\text{cm}^{-1}$ ; HRMS (ESI-TOF)  $[\text{M} + \text{Na}]^+$  calcd for  $\text{C}_{23}\text{H}_{22}\text{BrNNaO}_2^+$

10  $m/z$  446.0726, found 446.0727.  $[\alpha]_D^{25} -83.9$  (c 1.0,  $\text{CHCl}_3$ ). The enantiomeric ratio was

11 determined by analytical chiral HPLC. Retention time: 5.7 min (major isomer), 11.0 min

12 (minor isomer), IBN-3 column, 90/10 n-hexane/IPA, 1.0 mL/min, 254 nm.

13

14 2-phenylpropan-2-yl (*R*)-2-(4-vinylphenyl)amino)acetate (**3n**)

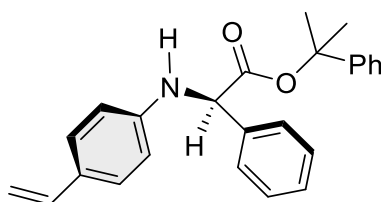

15

1 White solid (50.5 mg, 68% yield, 93 : 7 e.r.); m.p. 50-52 °C; TLC R<sub>f</sub> = 0.32 (n-  
2 hexane/EtOAc, 10/1); <sup>1</sup>H NMR (600 MHz, CDCl<sub>3</sub>) δ 7.46-7.49 (m, 2H), 7.32-7.40 (m,  
3 3H), 7.14-7.19 (m, 5H), 6.95-6.99 (m, 2H), 6.55 (dd, *J* = 17.1 Hz, 11.1 Hz, 1H), 6.45-  
4 6.49 (m, 2H), 5.47 (dd, *J* = 17.7 Hz, 0.90 Hz, 1H), 5.03-5.07 (m, 2H), 4.98 (dd, *J* = 10.8  
5 Hz, 1.2 Hz, 1H), 1.79 (s, 3H), 1.62 (s, 3H); <sup>13</sup>C NMR (100 MHz, CDCl<sub>3</sub>) δ 170.0, 145.7,  
6 144.8, 137.9, 136.6, 128.9 (2C), 128.3 (3C), 127.7, 127.5 (2C), 127.4 (2C), 127.3, 124.1  
7 (2C), 113.4 (2C), 109.8, 83.6, 61.1, 29.3, 27.6; IR (ATR) ν 3409, 3087, 3060, 3030, 2980,  
8 2930, 2368, 2330, 2248, 2017 cm<sup>-1</sup>; HRMS (ESI-TOF) [M + Na]<sup>+</sup> calcd for  
9 C<sub>25</sub>H<sub>25</sub>NNaO<sub>2</sub><sup>+</sup> m/z 394.1778, found 394.1777. [α]<sub>D</sub><sup>25</sup> -98.1 (c 1.0, CHCl<sub>3</sub>). The  
10 enantiomeric ratio was determined by analytical chiral HPLC. Retention time: 6.8 min  
11 (major isomer), 12.1 min (minor isomer), IBN-3 column, 95/5 *n*-hexane/IPA, 1.0 mL/min,  
12 254 nm.

13

14 2-phenylpropan-2-yl (*R*)-2-(naphthalen-1-ylamino)-2-phenylacetate (**3o**)

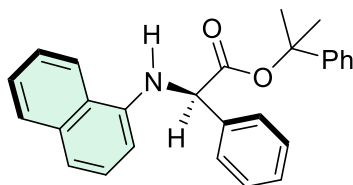

15

16 Colorless amorphous (70.4 mg, 89% yield, 95 : 5 e.r.); TLC R<sub>f</sub> = 0.48 (n-hexane/EtOAc,  
17 6/1); <sup>1</sup>H NMR (400 MHz, CDCl<sub>3</sub>) δ 7.94-7.98 (m, 1H), 7.73-7.78 (m, 1H), 7.57

1 (d,  $J = 6.4$  Hz, 2H), 7.34-7.46 (m, 5H), 7.14-7.21 (m, 5H), 6.96-7.02 (m, 2H), 6.33 (dd,  $J$   
2 = 6.6, 2.8 Hz, 1H), 5.82 (d,  $J = 4.8$  Hz, 1H), 5.22 (d,  $J = 4.8$  Hz, 1H), 1.83 (s, 3H), 1.64  
3 (s, 3H);  $^{13}\text{C}$  NMR (100 MHz,  $\text{CDCl}_3$ )  $\delta$  170.3, 144.9, 141.1, 137.9, 134.4, 128.9 (2C),  
4 128.7, 128.4 (3C), 127.5 (2C), 127.4, 126.5, 125.9, 125.0, 124.1 (2C), 123.4, 120.2,  
5 117.8, 105.6, 83.7, 61.3, 29.6, 27.5; IR (ATR)  $\nu$  3430, 3060, 2980, 1733, 1582, 1526,  
6 1478, 1450, 1408, 1384  $\text{cm}^{-1}$ ; HRMS (ESI-TOF)  $[\text{M} + \text{Na}]^+$  calcd for  $\text{C}_{27}\text{H}_{25}\text{NNaO}_2^+$   $m/z$   
7 418.1778, found 418.1785.  $[\alpha]_D^{25} +7.9$  (c 1.0,  $\text{CHCl}_3$ ). The enantiomeric ratio was  
8 determined by analytical chiral HPLC. Retention time: 9.6 min (major isomer), 12.8 min  
9 (minor isomer), IBN-3 column, 97/3 *n*-hexane/IPA, 1.0 mL/min, 254 nm.

10

11 2-phenylpropan-2-yl (*R*)-2-((4-bromophenyl)amino)-2-(naphthalen-2-yl)acetate (**3p**)

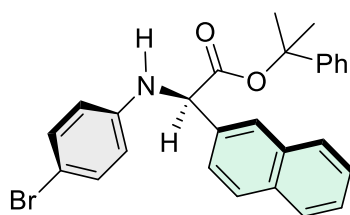

12

13 White solid (94.9 mg, quant., 76 : 24 e.r.); m.p. 106-108 °C; TLC  $R_f = 0.38$  (*n*-  
14 hexane/EtOAc, 8/1);  $^1\text{H}$  NMR (400 MHz,  $\text{CDCl}_3$ )  $\delta$  7.79-7.91 (m, 4H), 7.57 (dd,  $J = 8.7$   
15 Hz, 1.4 Hz, 2H), 7.48-7.52 (m, 2H), 7.12-7.15 (m, 2H), 7.06 (t,  $J = 15.1$  Hz, 2H), 6.93 (d,  
16  $J = 7.8$  Hz, 2H), 6.40-6.42 (m, 2H), 5.11-5.15 (m, 2H), 1.78 (s, 3H), 1.59 (s, 3H);  $^{13}\text{C}$   
17 NMR (100 MHz,  $\text{CDCl}_3$ )  $\delta$  169.8, 145.0, 144.7, 135.0, 133.5, 133.4, 132.0 (2C), 128.8,

1 127.9, 128.3 (2C), 128.2, 127.4, 126.6, 126.5, 126.4, 125.2, 124.2 (2C), 115.1 (2C), 109.7,  
2 83.9, 61.2, 29.2, 27.7; IR (ATR)  $\nu$  3410, 3062, 3018, 2980, 2360, 2302, 1734, 1597, 1496,  
3 1448  $\text{cm}^{-1}$ ; HRMS (ESI-TOF)  $[\text{M} + \text{Na}]^+$  calcd for  $\text{C}_{27}\text{H}_{24}\text{BrNNaO}_2^+$   $m/z$  496.0883,  
4 found 496.0903.  $[\alpha]_D^{25} -70.8$  (c 1.0,  $\text{CHCl}_3$ ). The enantiomeric ratio was determined by  
5 analytical chiral HPLC. Retention time: 10.8 min (major isomer), 17.5 min (minor  
6 isomer), IBN-3 column, 95/5 *n*-hexane/IPA, 1.0 mL/min, 254 nm.

7

8 2-phenylpropan-2-yl (*R*)-2-(4-bromophenyl)-2-((4-bromophenyl)amino)acetate (**3q**)

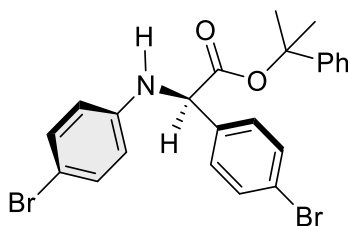

9

10 Colorless amorphous (95.6 mg, 95% yield, 95 : 5 e.r.); TLC  $R_f$  = 0.44 (*n*-hexane/EtOAc,  
11 6/1);  $^1\text{H}$  NMR (600 MHz,  $\text{CDCl}_3$ )  $\delta$  7.50-7.53 (m, 2H), 7.33-7.36 (m, 2H), 7.15-7.22 (m,  
12 5H), 6.98-7.01 (m, 2H), 6.33-6.36 (m, 2H), 5.00 (d,  $J$  = 3.0 Hz, 1H), 4.94 (d,  $J$  = 3.0 Hz,  
13 1H), 1.79 (s, 3H), 1.63 (s, 3H);  $^{13}\text{C}$  NMR (100 MHz,  $\text{CDCl}_3$ )  $\delta$  169.3, 144.6, 144.5, 136.2,  
14 134.3, 132.0 (2C), 129.1 (2C), 128.8 (2C), 128.4 (2C), 127.5, 124.1 (2C), 115.0 (2C),  
15 109.8, 84.1, 60.5, 29.1, 27.6; IR (ATR)  $\nu$  3399, 2981, 2312, 1732, 1596, 1497, 1448, 1404,  
16 1385, 1367  $\text{cm}^{-1}$ ; HRMS (ESI-TOF)  $[\text{M} + \text{Na}]^+$  calcd for  $\text{C}_{23}\text{H}_{21}\text{Br}_2\text{NNaO}_2^+$   $m/z$   
17 523.9831, found 523.9830.  $[\alpha]_D^{25} -100.1$  (c 1.0,  $\text{CHCl}_3$ ). The enantiomeric ratio was

1 determined by analytical chiral HPLC. Retention time: 9.0 min (major isomer), 16.7 min  
2 (minor isomer), IBN-3 column, 95/5 *n*-hexane/IPA, 1.0 mL/min, 254 nm.

3

4 2-phenylpropan-2-yl (*R*)-2-((4-bromophenyl)amino)-2-(4-chlorophenyl)acetate (**3r**)

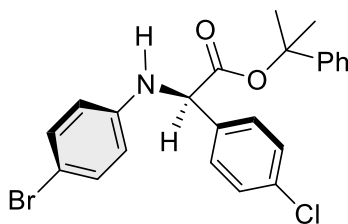

5

6 Colorless amorphous (55.1 mg, 60% yield, 94 : 6 e.r.); TLC R<sub>f</sub> = 0.44 (*n*-hexane/EtOAc,

7 6/1); <sup>1</sup>H NMR (400 MHz, CDCl<sub>3</sub>) δ 7.34-7.41 (m, 4H), 7.14-7.22 (m, 5H), 6.98-7.00 (m,

8 2H), 6.32-6.36 (m, 2H), 5.01 (d, *J* = 5.0 Hz, 1H), 4.95 (d, *J* = 5.0 Hz, 1H), 1.79 (s, 3H),

9 1.62 (s, 3H); <sup>13</sup>C NMR (100 MHz, CDCl<sub>3</sub>) δ 169.2, 144.6, 144.5, 136.8, 132.1 (4C), 129.1

10 (2C), 128.4 (2C), 127.5, 124.1 (2C), 122.4, 115.1 (2C), 109.9, 84.1, 60.5, 29.2, 27.7; IR

11 (ATR) ν 3398, 2981, 2352, 2310, 1733, 1597, 1496, 1448, 1408, 1385 cm<sup>-1</sup>; HRMS (ESI-

12 TOF) [M + Na]<sup>+</sup> calcd for C<sub>23</sub>H<sub>21</sub>BrClINaO<sub>2</sub><sup>+</sup> *m/z* 480.0336, found 480.0337. [α]<sub>D</sub><sup>25</sup> –

13 109.7 (c 1.0, CHCl<sub>3</sub>). The enantiomeric ratio was determined by analytical chiral HPLC.

14 Retention time: 8.3 min (major isomer), 15.0 min (minor isomer), IBN-3 column, 95/5 *n*-

15 hexane/IPA, 1.0 mL/min, 254 nm.

16

1 2-phenylpropan-2-yl (*R*)-2-((4-bromophenyl)amino)-2-(4-  
2 (trifluoromethyl)phenyl)acetate (**3s**)

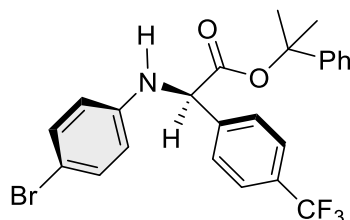

4 Colorless amorphous (73.9 mg, 75% yield, 95 : 5 e.r.); TLC R<sub>f</sub> = 0.48 (n-hexane/EtOAc,  
5 6/1); <sup>1</sup>H NMR (400 MHz, CDCl<sub>3</sub>) δ 7.62 (d, *J* = 8.2 Hz, 1H), 7.57 (d, *J* = 8.2 Hz, 1H),  
6 7.14-7.22 (m, 5H), 6.94-6.96 (m, 2H), 6.32-6.35 (m, 2H), 5.06 (dd, *J* = 11.4 Hz, 5.0 Hz,  
7 2H), 1.80 (s, 3H), 1.62 (s, 3H); <sup>13</sup>C NMR (100 MHz, CDCl<sub>3</sub>) δ 168.8, 144.3, 144.2, 141.7,  
8 132.0 (2C), 130.6 (q, *J* = 32.6 Hz), 128.2 (2C), 127.7 (2C), 127.4, 125.8 (q, *J* = 2.9 Hz,  
9 2C), 124.0 (q, *J* = 270.2 Hz), 123.9 (2C), 114.9 (2C), 109.9, 84.2, 60.6, 29.0, 27.4; <sup>19</sup>F  
10 NMR (376 MHz, CDCl<sub>3</sub>) δ -61.1; IR (ATR) ν 3842, 3404, 2982, 2934, 2351, 2319, 1734,  
11 1617, 1597, 1497 cm<sup>-1</sup>; HRMS (ESI-TOF) [M + Na]<sup>+</sup> calcd for C<sub>24</sub>H<sub>22</sub>BrF<sub>3</sub>NO<sub>2</sub><sup>+</sup> m/z  
12 492.0781, found 492.0774. [α]<sub>D</sub><sup>25</sup> -76.3 (c 1.0, CHCl<sub>3</sub>). The enantiomeric ratio was  
13 determined by analytical chiral HPLC. Retention time: 8.7 min (major isomer), 15.2 min  
14 (minor isomer), IBN-3 column, 95/5 *n*-hexane/IPA, 1.0 mL/min, 254 nm.  
15  
16 2-phenylpropan-2-yl (*R*)-2-((4-bromophenyl)amino)-2-(*p*-tolyl)acetate (**3t**)

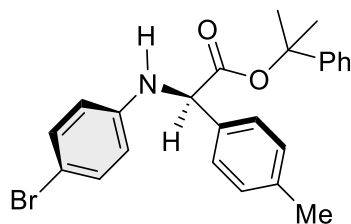

1

2 White solid (85.0 mg, 97% yield, 92 : 8 e.r.); m.p. 82-84 °C ;TLC Rf = 0.32 (n-

3 hexane/EtOAc, 10/1); <sup>1</sup>H NMR (400 MHz, CDCl<sub>3</sub>) δ 7.32 (d, *J* = 7.8 Hz, 2H), 7.13-7.20

4 (m, 7H), 6.97-7.00 (m, 2H), 6.35-6.40 (m, 2H), 4.94-4.98 (m, 2H), 2.36 (s, 3H), 1.77 (s,

5 3H), 1.61 (s, 3H); <sup>13</sup>C NMR (100 MHz, CDCl<sub>3</sub>) δ 170.0, 145.0, 144.8, 138.2, 134.5, 132.0

6 (2C), 129.6 (2C), 128.3 (2C), 127.3 (3C), 124.2 (2C) , 115.1 (2C) , 109.5, 83.6, 60.8, 29.3,

7 27.7, 21.3; IR (ATR) ν 3840, 3415, 3014, 2984, 2927, 2871, 2368, 2350, 2328, 1733

8 cm<sup>-1</sup>; HRMS (ESI-TOF) [M + Na]<sup>+</sup> calcd for C<sub>24</sub>H<sub>24</sub>BrNNaO<sub>2</sub><sup>+</sup> m/z 460.0883, found

9 460.0885. [α]<sub>D</sub><sup>25</sup> -100.7 (c 1.0, CHCl<sub>3</sub>). The enantiomeric ratio was determined by

10 analytical chiral HPLC. Retention time: 7.4 min (major isomer), 15.3 min (minor isomer),

11 IBN-3 column, 95/5 *n*-hexane/IPA, 1.0 mL/min, 254 nm.

12

13 2-phenylpropan-2-yl (*R*)-2-((4-bromophenyl)amino)-2-(*m*-tolyl)acetate (**3u**)

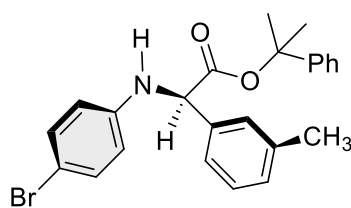

14

1 Colorless oil (65.8 mg, 75% yield, 95 : 5 e.r.); TLC Rf = 0.33 (n-hexane/EtOAc, 6/1); <sup>1</sup>H  
2 NMR (400 MHz, CDCl<sub>3</sub>) δ 7.22-7.27 (m, 3H), 7.14-7.19 (m, 6H), 6.95-6.98 (m, 2H),  
3 6.37-6.41 (m, 2H), 4.93-4.98 (m, 2H), 2.35 (s, 3H), 1.79 (s, 3H), 1.60 (s, 3H); <sup>13</sup>C NMR  
4 (100 MHz, CDCl<sub>3</sub>) δ 169.9, 145.0, 144.8, 138.6, 137.4, 132.0 (2C), 129.2, 128.8, 128.3  
5 (2C), 127.9, 127.3, 124.7, 124.2 (2C), 115.0 (2C), 109.5, 83.7, 61.1, 29.4, 27.5, 21.6; IR  
6 (ATR) ν 3752, 3394, 3025, 2979, 2932, 2370, 2355, 2340, 2330, 1732 cm<sup>-1</sup>; HRMS (ESI-  
7 TOF) [M + Na]<sup>+</sup> calcd for C<sub>24</sub>H<sub>24</sub>BrNNaO<sub>2</sub><sup>+</sup> m/z 460.0883, found 460.0891. [α]<sub>D</sub><sup>25</sup> -76.0  
8 (c 1.0, CHCl<sub>3</sub>). The enantiomeric ratio was determined by analytical chiral HPLC.  
9 Retention time: 6.4 min (major isomer), 11.4 min (minor isomer), IBN-3 column, 95/5 n-  
10 hexane/IPA, 1.0 mL/min, 254 nm.

11

12 2-phenylpropan-2-yl (R)-2-((4-bromophenyl)amino)-2-(3-methoxyphenyl)acetate (**3v**)

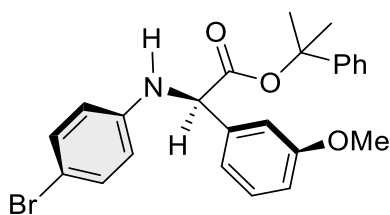

13

14 Colorless oil (80.9 mg, 89% yield, 96 : 4 e.r.); TLC Rf = 0.24 (n-hexane/EtOAc, 6/1); <sup>1</sup>H  
15 NMR (400 MHz, CDCl<sub>3</sub>) δ 7.29 (t, *J* = 15.6 Hz, 1H), 7.14-7.20 (m, 5H), 7.06 (d, *J* = 7.3  
16 Hz, 1H) 6.97-6.99 (m, 3H), 6.87-6.90 (m, 1H), 6.37-6.40 (m, 2H), 5.00 (d, *J* = 5.5 Hz,  
17 1H), 4.95 (d, *J* = 5.5 Hz, 1H), 3.77 (s, 3H), 1.79 (s, 3H), 1.61 (s, 3H); <sup>13</sup>C NMR (100

1 MHz, CDCl<sub>3</sub>) δ 169.7, 160.1, 144.9, 144.7, 139.1, 132.0 (2C), 129.9, 128.3 (2C), 127.4,  
2 124.2 (2C), 119.9, 115.0 (2C), 114.1, 112.6, 109.6, 83.8, 61.1, 55.4, 29.3, 27.6; IR (ATR)  
3 ν 3902, 3839, 3689, 3649, 3542, 3393, 3063, 2980, 2834, 2375 cm<sup>-1</sup>; HRMS (ESI-TOF)  
4 [M + Na]<sup>+</sup> calcd for C<sub>24</sub>H<sub>24</sub>BrNNaO<sub>3</sub><sup>+</sup> m/z 476.0832, found 476.0833. [α]<sub>D</sub><sup>25</sup> -83.1 (c 1.0,  
5 CHCl<sub>3</sub>). The enantiomeric ratio was determined by analytical chiral HPLC. Retention  
6 time: 8.7 min (major isomer), 18.1 min (minor isomer), IBN-3 column, 95/5 *n*-  
7 hexane/IPA, 1.0 mL/min, 254 nm.

8

9 2-phenylpropan-2-yl (R)-2-(benzo[d][1,3]dioxol-5-yl)-2-((4-  
10 bromophenyl)amino)acetate (**3w**)

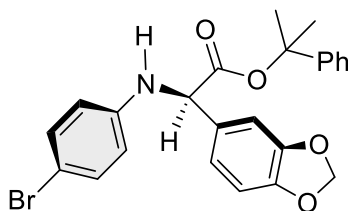

11

12 Colorless amorphous (72.1 mg, 77% yield, 97 : 3 e.r.); TLC R<sub>f</sub> = 0.32 (*n*-hexane/EtOAc,  
13 10/1); <sup>1</sup>H NMR (400 MHz, CDCl<sub>3</sub>) δ 7.15-7.25 (m, 5H), 7.03-7.05 (m, 2H), 6.90-6.96 (m,  
14 2H), 6.81 (d, *J* = 7.8 Hz, 2H), 6.36-6.39 (m, 2H), 5.97-5.99 (m, 2H), 4.97 (d, *J* = 5.5 Hz,  
15 1H), 4.88 (d, *J* = 5.5 Hz, 1H), 1.79 (s, 3H), 1.64 (s, 3H); <sup>13</sup>C NMR (100 MHz, CDCl<sub>3</sub>) δ  
16 169.8, 148.2, 147.7, 144.8, 132.0 (2C), 131.4, 128.3 (2C), 127.4, 124.2 (2C), 121.1, 115.0  
17 (2C), 109.6, 108.6, 107.6, 101.4, 83.8, 60.7, 29.2, 27.7; IR (ATR) ν 3412, 2981, 2360,

1 2351, 2330, 1732, 1396, 1488, 1443, 1385  $\text{cm}^{-1}$ ; HRMS (ESI-TOF)  $[\text{M} + \text{Na}]^+$  calcd for  
2  $\text{C}_{24}\text{H}_{24}\text{BrNNaO}_4^+$   $m/z$  490.0625, found 490.0629.  $[\alpha]^{25}_{\text{D}} -101.7$  (c 1.0,  $\text{CHCl}_3$ ). The  
3 enantiomeric ratio was determined by analytical chiral HPLC. Retention time: 10.3 min  
4 (major isomer), 26.2 min (minor isomer), IBN-3 column, 95/5 *n*-hexane/IPA, 1.0 mL/min,  
5 254 nm.

6

7 *tert*-butyl (*R*)-2-((4-bromophenyl)amino)-2-phenylacetate (**3x**)

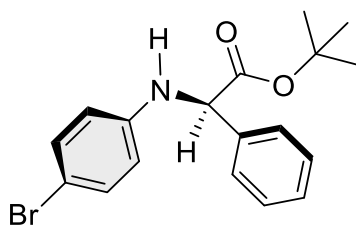

9 White solid (42.0 mg, 58% yield, 95 : 5 e.r.); m.p. 135-137  $^{\circ}\text{C}$ ; TLC  $R_f = 0.32$  (*n*-  
10 hexane/EtOAc, 10/1);  $^1\text{H}$  NMR (400 MHz,  $\text{CDCl}_3$ )  $\delta$  7.43-7.45 (m, 2H), 7.27-7.36 (m,  
11 3H), 7.16-7.19 (m, 2H), 6.39-6.43 (m, 2H), 5.02 (d,  $J = 5.2$  Hz, 1H), 4.90 (d,  $J = 5.6$  Hz,  
12 1H), 1.38 (s, 9H);  $^{13}\text{C}$  NMR (100 MHz,  $\text{CDCl}_3$ )  $\delta$  170.6, 145.1, 137.7, 132.0 (2C), 128.8  
13 (2C), 128.2, 127.1 (2C), 115.0 (2C), 109.5, 82.7, 61.1, 27.9 (3C); IR (ATR)  $\nu$  3737, 3418,  
14 3055, 3019, 2980, 2927, 2853, 2370, 2359, 2341  $\text{cm}^{-1}$ ; HRMS (ESI-TOF)  $[\text{M} + \text{Na}]^+$   
15 calcd for  $\text{C}_{18}\text{H}_{21}\text{BrNO}_2^+$   $m/z$  362.0756, found 362.0762.  $[\alpha]^{25}_{\text{D}} -67.2$  (c 1.0,  $\text{CHCl}_3$ ). The  
16 enantiomeric ratio was determined by analytical chiral HPLC. Retention time: 5.1 min

1 (major isomer), 6.6 min (minor isomer), IBN-3 column, 97/3 *n*-hexane/IPA, 1.0 mL/min,

2 254 nm.

3

4 ethyl (*R*)-4-((2-oxo-1-phenyl-2-((2-phenylpropan-2-yl)oxy)ethyl)amino)benzoate (**3y**)

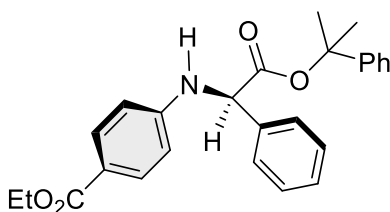

6 Colorless oil (70.3 mg, 95% yield, 97 : 3 e.r.); TLC R<sub>f</sub> = 0.35 (*n*-hexane/EtOAc, 6/1); <sup>1</sup>H

7 NMR (400 MHz, CDCl<sub>3</sub>) δ 7.79 (d, *J* = 8.8 Hz, 2H), 7.44-7.47 (m, 2H), 7.35-7.41 (m,

8 3H) 7.14-7.19 (m, 3H), 6.95-6.98 (m, 2H), 6.47 (d, *J* = 8.8 Hz, 2H), 5.40 (d, *J* = 5.6 Hz,

9 1H), 5.09 (d, *J* = 5.6 Hz, 1H), 4.27 (q, *J* = 7.2 Hz, 2H), 1.80 (s, 3H), 1.61 (s, 3H), 1.32 (t,

10 *J* = 6.8 Hz, 3H); <sup>13</sup>C NMR (400 MHz, CDCl<sub>3</sub>) δ 169.4, 166.7, 149.4, 144.5, 137.1, 131.3

11 (2C), 128.9 (2C), 128.4, 128.2 (2C), 127.3 (2C), 124.0 (2C), 119.4, 112.3 (2C) , 83.8,

12 77.2, 60.4, 60.2, 29.2, 27.4, 14.4; IR (ATR) ν 3391, 2980, 1735, 1700, 1606, 1524, 1496,

13 1479, 1450, 1385 cm<sup>-1</sup>; HRMS (ESI-TOF) [M + Na]<sup>+</sup> calcd for C<sub>26</sub>H<sub>27</sub>NNaO<sub>4</sub><sup>+</sup> m/z

14 440.1832, found 440.1832. [α]<sub>D</sub><sup>25</sup> -69.3 (c 0.89, CHCl<sub>3</sub>). The enantiomeric ratio was

15 determined by analytical chiral HPLC. Retention time: 12.4 min (major isomer), 15.0 min

16 (minor isomer), IC-3 column, 85/15 *n*-hexane/IPA, 1.0 mL/min, 254 nm.

17

1 2-phenylpropan-2-yl (R)-2-((2-benzoyl-4-chlorophenyl)amino)-2-phenylacetate (**3z**)

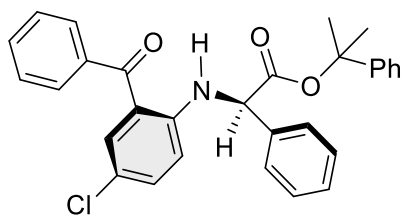

3 Yellow solid (96.8 mg, quant., 84 : 16 e.r.); m.p. 92-95 °C; TLC R<sub>f</sub> = 0.42 (n-  
4 hexane/EtOAc, 10/1); <sup>1</sup>H NMR (400 MHz, CDCl<sub>3</sub>) δ 9.44 (d, *J* = 5.6 Hz, 1H), 7.63 (m,  
5 2H), 7.36-7.56 (m, 10H), 7.13-7.19 (m, 4H), 6.97-7.02 (m, 2H), 6.48 (d, *J* = 8.8 Hz, 1H),  
6 5.15 (d, *J* = 6.0 Hz, 1H), 1.80 (s, 3H), 1.67 (s, 3H); <sup>13</sup>C NMR (400 MHz, CDCl<sub>3</sub>) δ 197.9,  
7 168.6, 147.7, 144.7, 139.4, 136.9, 134.4, 134.0, 131.4, 129.2 (2C), 129.0 (2C), 128.5,  
8 128.2 (2C), 128.1 (2C), 127.3 (2C), 127.1, 124.1 (2C), 119.5, 119.2, 114.1, 83.7, 61.0,  
9 29.2, 27.4; IR (ATR) ν<sub>2956</sub>, 2925, 2868, 2854, 2336, 1744, 1712, 1633, 1562, 1508 cm<sup>-1</sup>;  
10 HRMS (ESI-TOF) [M + Na]<sup>+</sup> calcd for C<sub>30</sub>H<sub>26</sub>ClNNaO<sub>3</sub><sup>+</sup> m/z 506.1493, found 506.1502.  
11 [α]<sub>D</sub><sup>25</sup> +52.1 (c 0.4, CHCl<sub>3</sub>). The enantiomeric ratio was determined by analytical chiral  
12 HPLC. Retention time: 8.0 min (major isomer), 11.5 min (minor isomer), IBN-3 column,  
13 97/3 *n*-hexane/IPA, 1.0 mL/min, 254 nm.

14

15 2-phenylpropan-2-yl (R)-2-((8-oxo-5,6,7,8-tetrahydronaphthalen-2-yl)amino)-2-  
16 phenylacetate (**3aa**)

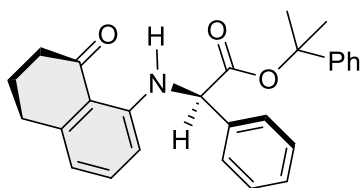

1  
 2 Off-white amorphous (72.8 mg, 88% yield, 90 : 10 er); TLC R<sub>f</sub> = 0.26 (n-hexane/EtOAc,  
 3 2/1); <sup>1</sup>H NMR (400 MHz, CDCl<sub>3</sub>) δ 7.82 (d, *J* = 8.4 Hz, 1H), 7.43-7.47 (m, 2H), 7.36-  
 4 7.42 (m, 3H), 7.12-7.19 (m, 3H), 6.96-6.98 (m, 2H), 6.41 (dd, *J* = 8.4 Hz, 2.4 Hz, 1H),  
 5 6.24 (d, *J* = 1.6 Hz, 1H), 5.47 (d, *J* = 5.2 Hz, 1H), 5.1 (d, *J* = 5.6 Hz, 1H), 2.75 (dd, *J* =  
 6 5.6 Hz, 4.4 Hz, 2H), 2.51 (dd, *J* = 6.7, 6.7 Hz, 2H), 2.01 (m, 2H), 1.80 (s, 3H), 1.62 (s,  
 7 3H); <sup>13</sup>C NMR (400 MHz, CDCl<sub>3</sub>) δ 196.8, 169.3, 149.8, 146.7, 144.5, 137.1, 129.5, 128.9  
 8 (2C), 128.5, 128.2 (2C), 127.3, 127.2 (2C), 124.0 (2C), 123.5, 111.9, 110.9, 83.9, 60.3,  
 9 38.7, 30.1, 29.2, 27.4, 23.3; IR (ATR) ν 3385, 2925, 1736, 1663, 1596, 1518, 1494, 1453,  
 10 1435, 1353 cm<sup>-1</sup>; HRMS (ESI-TOF) [M + Na]<sup>+</sup> calcd for C<sub>27</sub>H<sub>27</sub>NNaO<sub>3</sub><sup>+</sup> m/z 436.1883,  
 11 found 436.1888. [α]<sub>D</sub><sup>25</sup> -48.9 (c 1.15, CHCl<sub>3</sub>). The enantiomeric ratio was determined by  
 12 analytical chiral HPLC. Retention time: 17.0 min (major isomer), 28.5 min (minor  
 13 isomer), IC-3 column, 70/30 *n*-hexane/IPA, 1.0 mL/min, 254 nm.  
 14  
 15 2-phenylpropan-2-yl (*R*)-2-((4-chloro-2-formylphenyl)amino)-2-phenylacetate (**3ab**)

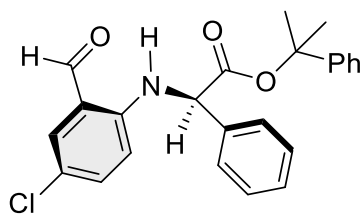

1

2 Yellow amorphous (77.5 mg, 95% yield, 86 : 14 e.r.); TLC R<sub>f</sub> = 0.27 (n-hexane/EtOAc,

3 10/1); <sup>1</sup>H NMR (400 MHz, CDCl<sub>3</sub>) δ 9.82 (s, 1H), 9.34 (d, *J* = 5.6 Hz, 1H), 7.45-7.47 (m,

4 3H), 7.34-7.41 (m, 3H), 7.13-7.19 (m, 4H), 6.97-6.99 (m, 2H), 6.39 (d, *J* = 9.2 Hz, 1H),

5 5.13 (d, *J* = 6.0 Hz, 1H), 1.81 (s, 3H), 1.66 (s, 3H); <sup>13</sup>C NMR (100 MHz, CDCl<sub>3</sub>) δ 192.7,

6 168.2, 146.6, 144.5, 139.4, 136.6, 135.4, 135.2, 129.0 (2C), 128.5, 128.1 (2C), 127.2 (2C),

7 127.2, 124.0, 120.4, 119.9, 113.6, 83.8, 60.6, 29.3, 27.3; IR (ATR) ν 3307, 2981, 2927,

8 2359, 1741, 1666, 1606, 1568, 1509, 1468 cm<sup>-1</sup>; HRMS (ESI-TOF) [M + Na]<sup>+</sup> calcd for

9 C<sub>24</sub>H<sub>22</sub>ClNNaO<sub>3</sub><sup>+</sup> m/z 430.1180, found 430.1186. [α]<sub>D</sub><sup>25</sup> +58.3 (c 0.55, CHCl<sub>3</sub>). The

10 enantiomeric ratio was determined by analytical chiral HPLC. Retention time: 11.0 min

11 (major isomer), 14.1 min (minor isomer), IBN-3 column, 97/3 *n*-hexane/IPA, 1.0 mL/min,

12 254 nm.

13

14 2-phenylpropan-2-yl (*R*)-2-phenyl-2-(pyren-2-ylamino)acetate (**3ac**)

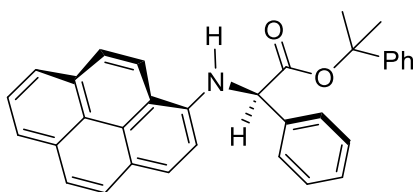

15

1 Orange solid (74.2 mg, 79% yield, 94 : 6 e.r.); m.p. 118-120 °C; TLC R<sub>f</sub> = 0.44 (n-  
2 hexane/DCM 2/1); <sup>1</sup>H NMR (400 MHz, CDCl<sub>3</sub>) δ 8.12 (d, *J* = 9.2 Hz, 1H), 7.95-8.04 (m,  
3 3H), 7.84-7.91 (m, 2H), 7.81 (d, *J* = 8.4 Hz, 1H), 7.73 (d, *J* = 8.8 Hz, 1H), 7.62 (d, *J* =  
4 6.4 Hz, 2H), 7.33-7.39 (m, 3H), 7.15-7.21 (m, 3H), 7.03 (d, *J* = 8.4 Hz 1H), 6.99 (dd, *J* =  
5 7.6 Hz, 1.6 Hz, 2H), 6.21 (d, *J* = 3.6 Hz, 1H), 5.40 (d, *J* = 3.6 Hz, 1H), 1.87 (s, 3H), 1.65  
6 (s, 3H); <sup>13</sup>C NMR (100 MHz, CDCl<sub>3</sub>) δ 170.1, 144.6, 139.8, 137.7, 132.2, 131.6, 128.8  
7 (2C), 128.3, 128.2 (2C) , 127.6, 127.4 (2C), 127.3, 126.0, 126.0, 125.9, 125.9, 125.5,  
8 124.0 (2C), 123.8, 123.4, 123.3, 123.2, 119.5, 116.7, 109.9, 83.8, 61.2, 29.5, 27.3; IR  
9 (ATR) ν 3432, 3034, 2360, 1734, 1624, 1603, 1521, 1489, 1467, 1297 cm<sup>-1</sup>; HRMS (ESI-  
10 TOF) [M + Na]<sup>+</sup> calcd for C<sub>33</sub>H<sub>27</sub>NNaO<sub>2</sub><sup>+</sup> m/z 492.1934, found 492.1940. [α]<sub>D</sub><sup>25</sup> +136.0  
11 (c 0.42, CHCl<sub>3</sub>). The enantiomeric ratio was determined by analytical chiral HPLC.  
12 Retention time: 7.8 min (major isomer), 20.4 min (minor isomer), IC-3 column, 95/5 n-  
13 hexane/IPA, 1.0 mL/min, 254 nm.  
14  
15 bis(2-phenylpropan-2-yl) 2,2'-((sulfonylbis(4,1-phenylene))bis(azanediyl))(2*R*,2'*R*)-  
16 bis(2-phenylacetate) (**3ad**)

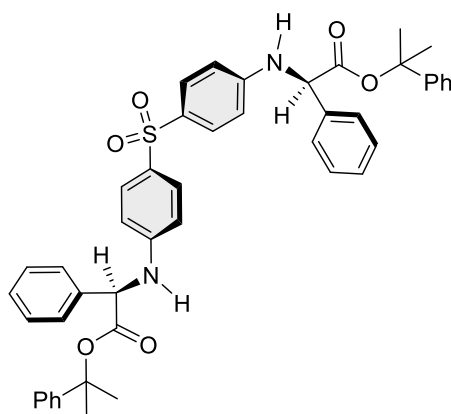

1

2 White amorphous (64.8 mg, 86% yield (0.1 mmol scale), 93 : 7 dr, 99 : 1 e.r.); TLC Rf =

3 0.22 (n-hexane/EtOAc, 2/1); <sup>1</sup>H NMR (400 MHz, CDCl<sub>3</sub>) δ 7.53 (d, *J* = 8.4 Hz, 4H), 7.33-

4 7.43 (m, 10H), 7.12-7.18 (m, 6H), 6.92 (dd, *J* = 7.8 Hz, 1.6 Hz, 4H), 6.42 (d, *J* = 9.2 Hz,

5 4H), 5.45 (d, *J* = 5.2 Hz, 2H), 5.00 (d, *J* = 5.2 Hz, 2H), 1.78 (s, 6H), 1.59 (s, 6H); <sup>13</sup>C

6 NMR (100 MHz, CDCl<sub>3</sub>) δ 169.2 (2C), 148.9 (2C), 144.4 (2C), 136.8 (2C), 130.4 (2C),

7 129.0 (4C), 128.9 (4C), 128.5 (2C), 128.2 (4C) , 127.3 (2C), 127.2 (4C) , 123.9 (4C),

8 112.6 (4C), 83.9 (2C), 60.3 (2C), 29.2 (2C), 27.3 (2C); IR (ATR) ν 3376, 2927, 2364,

9 2354, 1732, 1596, 1514, 1453, 1328, 1298 cm<sup>-1</sup>; HRMS (ESI-TOF) [M + Na]<sup>+</sup> calcd for

10 C<sub>46</sub>H<sub>44</sub>N<sub>2</sub>NaO<sub>6</sub>S<sup>+</sup> m/z 775.2812, found 775.2815. [α]<sub>D</sub><sup>25</sup> -74.5 (c 0.35, CHCl<sub>3</sub>). The

11 enantiomeric ratio was determined by analytical chiral HPLC. Retention time: 24.4 min

12 (minor enantiomer), 29.6 min (meso-diastereomer), 33.1 min (major isomer), IC-3

13 column, 70/30 *n*-hexane/IPA, 1.0 mL/min, 254 nm.

14

15 2-phenylpropan-2-yl (*R*)-2-((4-(hydroxymethyl)phenyl)amino)-2-phenylacetate (**9a**)

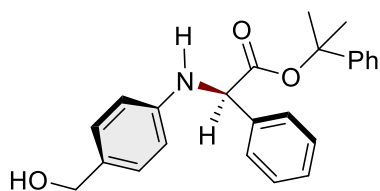

1  
 2 White amorphous (75.0 mg, quant., 93 : 7 e.r.); TLC Rf = 0.19 (n-hexane/EtOAc 2/1); <sup>1</sup>H  
 3 NMR (600 MHz, CDCl<sub>3</sub>) δ 7.48 (d, *J* = 8.3 Hz, 2H), 7.33-7.39 (m, 3H), 7.15-7.20 (m, 3H),  
 4 7.10 (d, *J* = 7.6 Hz, 2H), 6.96-6.99 (m, 2H), 6.50 (d, *J* = 7.6 Hz, 2H), 5.05 (d, *J* = 4.8 Hz,  
 5 1H), 5.01 (d, *J* = 4.8 Hz, 1H), 4.49 (s, 2H), 1.79 (s, 3H), 1.62 (s, 3H); <sup>13</sup>C NMR (100  
 6 MHz, CDCl<sub>3</sub>) δ 169.9, 145.6, 144.7, 137.8, 130.1, 128.7 (2C), 128.2 (2C), 128.2 (2C),  
 7 127.4 (2C), 127.2 (2C), 124.0 (2C), 113.3 (2C), 83.5, 65.3, 61.0, 29.2, 27.5; IR (ATR) ν  
 8 3407, 2980, 1734, 1615, 1521, 1496, 1471, 1451, 1385, 1367 cm<sup>-1</sup>; HRMS (ESI-TOF)  
 9 [M + Na]<sup>+</sup> calcd for C<sub>24</sub>H<sub>25</sub>NNaO<sub>3</sub><sup>+</sup> m/z 398.1727, found 398.1733. [α]<sub>D</sub><sup>25</sup> -53.5 (c 0.22,  
 10 CHCl<sub>3</sub>). The enantiomeric ratio was determined by analytical chiral HPLC. Retention  
 11 time: 12.3 min (major isomer), 23.1 min (minor isomer), IC-3 column, 85/15 *n*-  
 12 hexane/IPA, 1.0 mL/min, 254 nm.  
 13  
 14 2-phenylpropan-2-yl (*R*)-2-((4-(hydroxymethyl)phenyl)amino)-2-(3-  
 15 methoxyphenyl)acetate (**9b**)

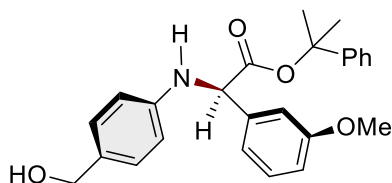

16

1 Yellow amorphous (81.1 mg, quant., 95 : 5 e.r.); TLC Rf = 0.14 (n-hexane/EtOAc 2/1);  
2 <sup>1</sup>H NMR (400 MHz, CDCl<sub>3</sub>) δ 7.29 (t, *J* = 8.0 Hz, 1H), 7.16-7.20 (m, 3H), 7.07-7.12 (m,  
3 3H), 6.97-7.01 (m, 3H), 6.88 (dd, *J* = 8.2, 1.8 Hz, 2H), 6.51 (d, *J* = 8.8 Hz, 2H), 5.01 (s,  
4 2H), 4.49 (s, 2H), 3.77 (s, 3H), 1.80 (s, 3H), 1.62 (s, 3H); <sup>13</sup>C NMR (100 MHz, CDCl<sub>3</sub>) δ  
5 169.8, 159.9, 145.6, 144.7, 139.4, 130.1, 129.7, 128.7 (2C), 128.1 (2C), 127.2, 124.0  
6 (2C), 119.8, 114.0, 113.3 (2C), 112.5, 83.5, 65.3, 61.0, 55.2, 29.2, 27.5; IR (ATR) ν 3388,  
7 2925, 2866, 2364, 1734, 1615, 1600, 1523, 1490, 1463 cm<sup>-1</sup>; HRMS (ESI-TOF) [M +  
8 Na]<sup>+</sup> calcd for C<sub>25</sub>H<sub>27</sub>NNaO<sub>4</sub><sup>+</sup> m/z 428.1832, found 428.1838. [α]<sub>D</sub><sup>25</sup> -26.0 (c 0.52,  
9 CHCl<sub>3</sub>). The enantiomeric ratio was determined by analytical chiral HPLC. Retention  
10 time: 11.3 min (major isomer), 20.6 min (minor isomer), IC-3 column, 80/20 *n*-  
11 hexane/IPA, 1.0 mL/min, 254 nm.

12

13 2-phenylpropan-2-yl (*R*)-2-(benzo[*d*][1,3]dioxol-5-yl)-2-((4-  
14 (hydroxymethyl)phenyl)amino)acetate (**9c**)

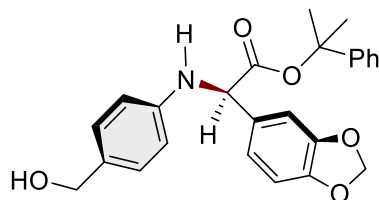

15

16 Colorless amorphous (51.1 mg, 61% yield, 95 : 5 e.r.); TLC Rf = 0.44 (n-hexane/EtOAc  
17 2/1); <sup>1</sup>H NMR (400 MHz, CDCl<sub>3</sub>) δ 7.21 (d, *J* = 2.0 Hz, 1H), 7.20 (d, *J* = 1.6 Hz, 2H),

1 7.03-7.08 (m, 4H), 6.97 (dd,  $J = 8.0, 1.6$  Hz, 1H), 6.96-6.99 (m, 2H), 6.93 (d,  $J = 1.6$  Hz,  
2 1H), 6.80 (d,  $J = 8.0$  Hz, 1H), 6.47 (d,  $J = 8.4$  Hz, 1H), 5.98 (d,  $J = 1.6$  Hz, 1H), 5.96(d,  
3  $J=1.0$  Hz, 1H), 4.93 (s, 2H), 4.30 (s, 2H), 1.78 (s, 3H), 1.64 (s, 3H);  $^{13}\text{C}$  NMR (150 MHz,  
4  $\text{CDCl}_3$ )  $\delta$  169.9, 148.0, 147.5, 145.4, 144.7, 131.7, 130.1, 128.7 (2C), 128.1 (2C), 127.2,  
5 124.0 (2C), 120.9, 113.3 (2C), 108.4, 107.6, 101.1, 83.5, 65.3, 60.6, 29.0, 27.7; IR (ATR)  
6  $\nu$  3413, 2956, 2925, 2855, 2341, 1733, 1614, 1521, 1487, 1444  $\text{cm}^{-1}$ ; HRMS (ESI-TOF)  
7  $[\text{M} + \text{Na}]^+$  calcd for  $\text{C}_{25}\text{H}_{27}\text{NNaO}_3^+$   $m/z$  442.1625, found 442.1629.  $[\alpha]_D^{25} -48.2$  (c 0.51,  
8  $\text{CHCl}_3$ ). The enantiomeric ratio was determined by analytical chiral HPLC. Retention  
9 time: 14.0 min (major isomer), 26.5 min (minor isomer), IC-3 column, 80/20 *n*-  
10 hexane/IPA, 1.0 mL/min, 254 nm.

11

12 2-phenylpropan-2-yl (*R*)-2-((4-(hydroxymethyl)phenyl)amino)-2-(*p*-tolyl)acetate (**9d**)

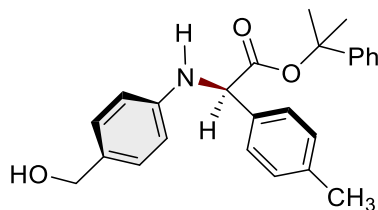

13

14 Colorless amorphous (74.0 mg, 95% yield, 87 : 13 e.r.); TLC  $R_f = 0.26$  (*n*-hexane/EtOAc  
15 2/1);  $^1\text{H}$  NMR (400 MHz,  $\text{CDCl}_3$ )  $\delta$  7.35 (d,  $J = 8.0$ Hz, 2H), 7.15-7.20 (m, 5H), 7.10 (d,  
16  $J = 8.4$  Hz, 2H), 6.98-7.02 (m, 2H), 6.50 (d,  $J = 8.4$  Hz, 2H), 5.02(d,  $J = 4.4$  Hz, 1H), 4.96  
17 (d,  $J = 4.4$  Hz, 1H), 4.49 (s, 2H), 2.37(s, 3H), 1.78 (s, 3H), 1.62 (s, 3H);  $^{13}\text{C}$  NMR (100

1 MHz, CDCl<sub>3</sub>) δ 170.1, 145.6, 144.8, 137.9, 134.7, 130.0, 129.4 (2C), 128.7 (2C), 128.1  
2 (2C), 127.2 (2C), 127.1, 124.0 (2C), 113.3 (2C), 83.3, 65.3, 60.7, 29.1, 27.6, 21.2 ; IR  
3 (ATR) ν 3408, 2981, 2927, 2369, 1734, 1616, 1522, 1449, 1384, 1312 cm<sup>-1</sup>; HRMS (ESI-  
4 TOF) [M + Na]<sup>+</sup> calcd for C<sub>25</sub>H<sub>27</sub>NNaO<sub>3</sub><sup>+</sup> m/z 412.1883, found 412.1882. [α]<sub>D</sub><sup>25</sup> -40.2 (c  
5 0.34, CHCl<sub>3</sub>). The enantiomeric ratio was determined by analytical chiral HPLC.  
6 Retention time: 10.2 min (major isomer), 17.7 min (minor isomer), IC-3 column, 80/20  
7 *n*-hexane/IPA, 1.0 mL/min, 254 nm.

8

9 2-phenylpropan-2-yl (*R*)-2-((4-(hydroxymethyl)phenyl)amino)-2-(*m*-tolyl)acetate (**9e**)

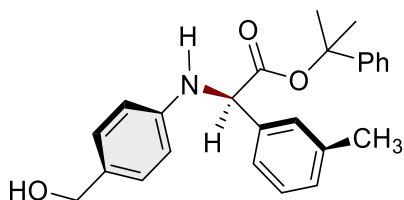

10

11 Colorless amorphous (70.1 mg, 91% yield, 90 : 10 e.r.); TLC R<sub>f</sub> = 0.39 (*n*-hexane/EtOAc  
12 2/1); <sup>1</sup>H NMR (600 MHz, CDCl<sub>3</sub>) δ 7.26-7.30 (m, 2H), 7.25-7.26 (m, 1H, overlapped with  
13 residual CHCl<sub>3</sub>), 7.14-7.19 (m, 4H), 7.11 (d, *J* = 8.4 Hz, 2H), 6.97 (m, 2H), 6.52 (d, *J* =  
14 9.0 Hz, 2H), 5.00(d, *J* = 5.7 Hz, 1H), 4.97 (d, *J* = 5.7 Hz, 1H), 4.50 (s, 2H), 2.353(s, 3H),  
15 1.79 (s, 3H), 1.62 (s, 3H); <sup>13</sup>C NMR (150 MHz, CDCl<sub>3</sub>) δ 170.1, 145.7, 144.8, 138.4,  
16 137.7, 130.1, 129.0, 128.8 (2C), 128.6, 128.1 (2C), 127.9, 127.2, 124.6, 124.1 (2C), 113.3  
17 (2C), 83.4, 65.4, 61.1, 29.2, 27.5, 21.4 ; IR (ATR) ν 3403, 2980, 2921, 1733, 1616, 1522,

1 1496, 1488, 1448, 1297  $\text{cm}^{-1}$ ; HRMS (ESI-TOF)  $[\text{M} + \text{Na}]^+$  calcd for  $\text{C}_{25}\text{H}_{27}\text{NNaO}_3^+$   $m/z$   
2 412.1883, found 412.1888.  $[\alpha]_{\text{D}}^{25} -57.0$  (c 0.23,  $\text{CHCl}_3$ ). The enantiomeric ratio was  
3 determined by analytical chiral HPLC. Retention time: 9.0 min (major isomer), 15.6 min  
4 (minor isomer), IC-3 column, 80/20 *n*-hexane/IPA, 1.0 mL/min, 254 nm.

5

6 2-phenylpropan-2-yl (*R*)-2-((4-(hydroxymethyl)phenyl)amino)-2-(4-  
7 (trifluoromethyl)phenyl)acetate (**9f**)

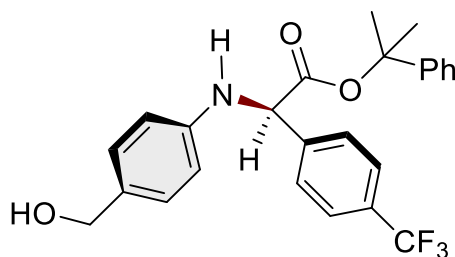

8

9 Yellow solid (75.4 mg, 85% yield, 91 : 9 e.r.); m.p. 83-85 °C; TLC  $R_f = 0.32$  (*n*-  
10 hexane/EtOAc 2/1);  $^1\text{H}$  NMR (400 MHz,  $\text{CDCl}_3$ )  $\delta$  7.64 (dd,  $J = 11.0, 9.2\text{Hz}$ , 4H), 7.14-  
11 7.21 (m, 3H), 7.11 (d,  $J = 8.4\text{ Hz}$ , 2H), 6.94-6.98 (m, 2H), 6.46 (d,  $J = 8.4\text{ Hz}$ , 2H), 5.09  
12 (m, 2H), 4.50 (s, 2H), 1.80 (s, 3H), 1.63 (s, 3H);  $^{13}\text{C}$  NMR (100 MHz,  $\text{CDCl}_3$ )  $\delta$  169.0,  
13 145.0, 144.3, 142.1, 130.4 (q,  $J = 32.0\text{ Hz}$ , 2C), 128.7 (2C), 128.2 (2C), 127.7 (2C),  
14 127.4, 125.7 (q,  $J = 3.8\text{ Hz}$ , 2C), 124.0 (q,  $J = 279.8\text{ Hz}$ ), 123.92 (2C), 113.3 (2C), 84.1,  
15 65.2, 60.7, 29.0, 27.5;  $^{19}\text{F}$  NMR (376 MHz,  $\text{CDCl}_3$ )  $\delta$  -62.4; IR (ATR)  $\nu$  3403, 2983,  
16 2931, 1735, 1616, 1523, 1496, 1472, 1449, 1419  $\text{cm}^{-1}$ ; HRMS (ESI-TOF)  $[\text{M} + \text{Na}]^+$

1 calcd for  $C_{25}H_{24}F_3NNaO_3^+$   $m/z$  466.1600, found 466.1605.  $[\alpha]^{25}_D -61.1$  (c 0.41,  $CHCl_3$ ).  
2 The enantiomeric ratio was determined by analytical chiral HPLC. Retention time: 6.8  
3 min (major isomer), 10.0 min (minor isomer), IC-3 column, 80/20 *n*-hexane/IPA, 1.0  
4 mL/min, 254 nm.

5  
6 2-phenylpropan-2-yl (*R*)-2-(4-fluorophenyl)-2-((4-  
7 (hydroxymethyl)phenyl)amino)acetate (**9g**)

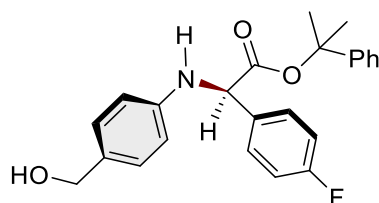

8  
9 Colorless amorphous (63.7 mg, 81% yield, 89 : 11 e.r.); TLC  $R_f$  = 0.28 (*n*-hexane/EtOAc  
10 2/1);  $^1H$  NMR (400 MHz,  $CDCl_3$ )  $\delta$  7.45 (dd,  $J$  = 8.4, 5.2 Hz, 2H), 7.17-7.21 (m, 3H),  
11 7.04-7.12 (m, 4H), 6.97-7.02 (m, 2H), 6.47 (d,  $J$  = 8.4 Hz, 2H), 5.02 (s, 2H), 4.49 (s, 2H),  
12 1.79 (s, 3H), 1.62 (s, 3H);  $^{13}C$  NMR (100 MHz,  $CDCl_3$ )  $\delta$  169.6, 162.6 (d,  $J$  = 245.5 Hz),  
13 145.3, 144.5, 133.6 (d,  $J$  = 3.4 Hz), 130.3, 129.0 (d,  $J$  = 8.1 Hz, 2C), 128.7 (2C), 128.2  
14 (2C), 127.3, 124.0 (2C), 115.7 (d,  $J$  = 21.5 Hz, 2C), 113.3 (2C), 83.7, 65.3, 60.3, 29.11,  
15 27.5;  $^{19}F$  NMR (376 MHz,  $CDCl_3$ )  $\delta$  -113.9; IR (ATR)  $\nu$  3413, 2956, 2926, 2856, 2342,  
16 1733, 1615, 1522, 1508, 1469  $cm^{-1}$ ; HRMS (ESI-TOF)  $[M + Na]^+$  calcd for  
17  $C_{24}H_{24}FNNaO_3^+$   $m/z$  416.1632, found 416.1629.  $[\alpha]^{25}_D -32.6$  (c 0.49,  $CHCl_3$ ). The  
18 enantiomeric ratio was determined by analytical chiral HPLC. Retention time: 11.3 min

1 (major isomer), 19.2 min (minor isomer), IC-3 column, 85/15 *n*-hexane/IPA, 1.0 mL/min,

2 254 nm.

3

4 2-phenylpropan-2-yl

(*R*)-2-(4-chlorophenyl)-2-((4-

5 (hydroxymethyl)phenyl)amino)acetate (**9h**)

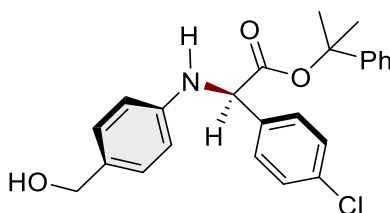

6

7 Yellow amorphous (46.7 mg, 57% yield, 93 : 7 e.r.); TLC R<sub>f</sub> = 0.32 (*n*-hexane/EtOAc

8 2/1); <sup>1</sup>H NMR (400 MHz, CDCl<sub>3</sub>) δ 7.43 (d, *J* = 8.4 Hz, 2H), 7.35 (d, 8.4 Hz, 2H), 7.18-

9 7.22 (m, 3H), 7.10 (d, *J* = 8.4 Hz, 2H), 6.99-7.02 (m, 2H), 6.46 (d, *J* = 8.4 Hz, 2H), 5.02

10 (s, 2H), 4.50 (s, 2H), 1.79 (s, 3H), 1.63 (s, 3H); <sup>13</sup>C NMR (100 MHz, CDCl<sub>3</sub>) δ 169.4,

11 145.2, 144.5, 136.5, 134.0, 130.3, 128.9 (2C), 128.7 (2C), 128.7 (2C), 128.2 (2C), 127.3,

12 124.0 (2C), 113.3 (2C), 83.8, 65.3, 60.4, 29.0, 27.6; IR (ATR) ν 3408, 2928, 1736, 1615,

13 1522, 1489, 1308, 1252, 1181, 1367 cm<sup>-1</sup>; HRMS (ESI-TOF) [M + Na]<sup>+</sup> calcd for

14 C<sub>24</sub>H<sub>24</sub>ClNNaO<sub>3</sub><sup>+</sup> m/z 432.1337, found 432.1347. [α]<sub>D</sub><sup>25</sup> -50.7 (c 0.18, CHCl<sub>3</sub>). The

15 enantiomeric ratio was determined by analytical chiral HPLC. Retention time: 17.3 min

16 (major isomer), 30.2 min (minor isomer), IC-3 column, 90/10 *n*-hexane/IPA, 1.0 mL/min,

17 254 nm.

1

2 2-phenylpropan-2-yl

(*R*)-2-(4-bromophenyl)-2-((4-

3 (hydroxymethyl)phenyl)amino)acetate (**9i**)

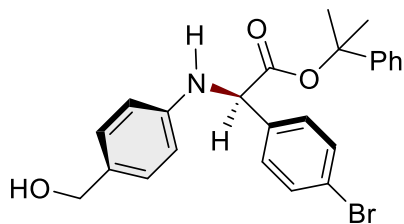

4

5 Colorless amorphous (81.8 mg, 90% yield, 89 : 11 e.r.); TLC R<sub>f</sub> = 0.28 (n-hexane/EtOAc

6 2/1); <sup>1</sup>H NMR (400 MHz, CDCl<sub>3</sub>) δ 7.50 (d, *J* = 8.4 Hz, 2H), 7.36 (d, *J* = 8.4 Hz, 2H),

7 7.18-7.22 (m, 3H), 7.08 (d, *J* = 8.4 Hz, 2H), 6.98-7.02 (m, 2H), 6.45 (d, *J* = 8.4 Hz, 2H),

8 5.00 (s, 2H), 4.47 (s, 2H), 1.79 (s, 3H), 1.63 (s, 3H); <sup>13</sup>C NMR (100 MHz, CDCl<sub>3</sub>) δ 169.3,

9 145.2, 144.4, 137.0, 131.9 (2C), 130.3, 129.0 (2C), 128.7 (2C), 128.2 (2C), 127.3, 124.0

10 (2C), 122.1, 113.3 (2C), 83.8, 65.2, 60.5, 29.0, 27.5; IR (ATR) ν 3399, 2980, 1732, 1615,

11 1521, 1496, 1485, 1448, 1405, 1385 cm<sup>-1</sup>; HRMS (ESI-TOF) [M + Na]<sup>+</sup> calcd for

12 C<sub>24</sub>H<sub>24</sub>BrNNaO<sub>3</sub><sup>+</sup> m/z 476.0832, found 476.0838. [α]<sub>D</sub><sup>25</sup> -99.6 (c 0.63, CHCl<sub>3</sub>). The

13 enantiomeric ratio was determined by analytical chiral HPLC. Retention time: 9.0 min

14 (major isomer), 14.2 min (minor isomer), IC-3 column, 80/20 *n*-hexane/IPA, 1.0 mL/min,

15 254 nm.

16

17 2-phenylpropan-2-yl (*R*)-2-((4-(2-hydroxyethyl)phenyl)amino)-2-phenylacetate (**9j**)

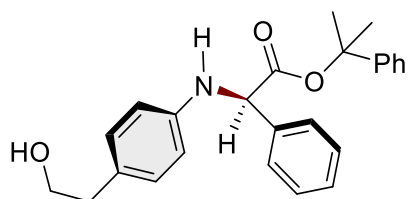

1

2 Pale yellow amorphous (68.6 mg, 88% yield, 93 : 7 e.r.); TLC Rf = 0.32 (n-hexane/EtOAc

3 2/1); <sup>1</sup>H NMR (400 MHz, CDCl<sub>3</sub>) δ 7.48 (dd, *J* = 8.4, 1.6 Hz, 2H), 7.32-7.41 (m, 3H),

4 7.14-7.19 (m, 3H), 6.93-6.99 (m, 4H), 6.48 (d, *J* = 8.4 Hz, 2H), 5.02 (s, 1H), 4.91 (s, 1H),

5 3.74 (t, *J* = 6.4 Hz, 2H), 2.70 (t, *J* = 6.4 Hz, 2H), 1.78 (s, 3H), 1.61 (s, 3H); <sup>13</sup>C NMR

6 (100 MHz, CDCl<sub>3</sub>) δ 170.0, 144.8, 144.6, 138.0, 129.8 (2C), 128.7 (2C), 128.1 (3C),

7 127.4 (2C), 127.2, 127.2, 124.0 (2C), 113.6 (2C), 83.4, 63.9, 61.2, 38.2, 29.1, 27.6; IR

8 (ATR) ν 3367, 2925, 1735, 1616, 1520, 1312, 1257, 1185, 1136, 1105 cm<sup>-1</sup>; HRMS (ESI-

9 TOF) [M + Na]<sup>+</sup> calcd for C<sub>25</sub>H<sub>27</sub>NNaO<sub>3</sub><sup>+</sup> m/z 412.1883, found 412.1897. [α]<sub>D</sub><sup>25</sup> -58.5 (c

10 0.12, CHCl<sub>3</sub>). The enantiomeric ratio was determined by analytical chiral HPLC.

11 Retention time: 8.7 min (major isomer), 12.3 min (minor isomer), IBN-3 column, 85/15

12 *n*-hexane/IPA, 1.0 mL/min, 254 nm.

13

14 2-phenylpropan-2-yl (R)-2-((4-(2-hydroxyethyl)phenyl)amino)-2-(3-

15 methoxyphenyl)acetate (**9k**)

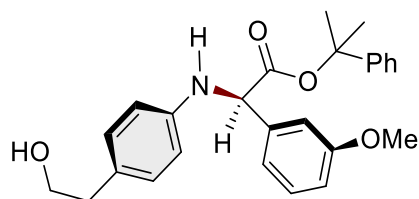

1

2 Colorless amorphous (83.9 mg, quant., 92 : 8 e.r.); TLC Rf = 0.25 (n-hexane/EtOAc 2/1);

3  $^1\text{H}$  NMR (400 MHz,  $\text{CDCl}_3$ )  $\delta$  7.30 (t,  $J = 8.0$  Hz, 1H), 7.16-7.20 (m, 3H), 7.09 (d,  $J =$

4 7.6 Hz, 1H), 6.98-7.02 (m, 3H), 6.96 (d,  $J = 8.4$  Hz, 2H), 6.88 (dd,  $J = 8.4, 2.4$  Hz, 1H),

5 6.49 (d,  $J = 8.4$  Hz 2H), 4.98 (d,  $J = 5.2$  Hz, 1H), 4.89 (d,  $J = 5.2$  Hz, 1H), 3.79 (s, 3H),

6 3.75 (q,  $J = 6.4$  Hz, 2H), 2.71 (t,  $J = 6.4$  Hz, 2H), 1.79 (s, 3H), 1.63 (s, 3H);  $^{13}\text{C}$  NMR

7 (150 MHz,  $\text{CDCl}_3$ )  $\delta$  169.9, 159.9, 144.7, 144.6, 139.6, 129.7 (2C), 129.7, 128.1 (2C),

8 127.3, 127.1, 124.0 (2C), 119.8, 113.9, 113.5 (2C), 112.5, 83.4, 63.8, 61.2, 55.2, 38.2,

9 29.1, 27.5; IR (ATR)  $\nu$  3411, 2981, 2931, 1733, 1560, 1520, 1489, 1467, 1451, 1436  $\text{cm}^{-1}$ ;

10 HRMS (ESI-TOF)  $[\text{M} + \text{Na}]^+$  calcd for  $\text{C}_{26}\text{H}_{29}\text{NNaO}_4^+$   $m/z$  442.1989, found 442.1995.

11  $[\alpha]_D^{25} -48.6$  (c 0.49,  $\text{CHCl}_3$ ). The enantiomeric ratio was determined by analytical chiral

12 HPLC. Retention time: 10.1 min (major isomer), 18.6 min (minor isomer), IC-3 column,

13 80/20 *n*-hexane/IPA, 1.0 mL/min, 254 nm.

14

15 2-phenylpropan-2-yl (*R*)-2-((3-(hydroxymethyl)phenyl)amino)-2-phenylacetate (**91**)

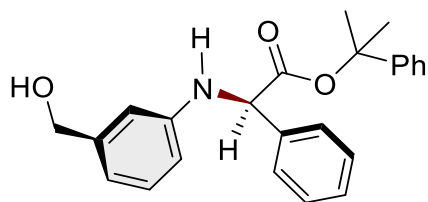

1

2 Colorless amorphous (67.6 mg, 90% yield, 89 : 11 e.r.); TLC Rf = 0.32 (n-hexane/EtOAc

3 2/1); <sup>1</sup>H NMR (400 MHz, CDCl<sub>3</sub>) δ 7.48 (dd, *J* = 7.6, 1.2 Hz, 2H), 7.31-7.40 (m, 3H),

4 7.14-7.19 (m, 3H), 7.07 (d, *J* = 8.0 Hz, 1H), 6.47-7.00 (m, 2H), 6.64 (d, *J* = 7.6 Hz, 1H),

5 6.54 (s, 1H), 6.44 (dd, *J* = 8.0, 2.0 Hz, 1H), 5.06 (d, *J* = 4.8 Hz, 1H), 4.99 (d, *J* = 4.8 Hz,

6 1H), 4.50 (s, 2H), 1.78 (s, 3H), 1.61 (s, 3H); <sup>13</sup>C NMR (100 MHz, CDCl<sub>3</sub>) δ 169.9, 146.2,

7 144.7, 142.0, 137.8, 129.4, 128.7 (2C), 128.1, 128.1 (2C), 127.3 (2C), 127.1, 124.0 (2C),

8 116.3, 112.5, 111.8, 83.4, 65.4, 61.0, 29.1, 27.5; IR (ATR) ν 3407, 3031, 2980, 2927,

9 1734, 1608, 1592, 1491, 1451, 1385 cm<sup>-1</sup>; HRMS (ESI-TOF) [M + Na]<sup>+</sup> calcd for

10 C<sub>24</sub>H<sub>25</sub>NNaO<sub>3</sub><sup>+</sup> m/z 398.1727, found 398.1726. [α]<sub>D</sub><sup>25</sup> -52.5 (c 0.44, CHCl<sub>3</sub>). The

11 enantiomeric ratio was determined by analytical chiral HPLC. Retention time: 12.5 min

12 (major isomer), 23.6 min (minor isomer), IC-3 column, 85/15 *n*-hexane/IPA, 1.0 mL/min,

13 254 nm.

14

15 2-phenylpropan-2-yl (R)-2-((4-(hydroxymethyl)-3-methylphenyl)amino)-2-

16 phenylacetate (**9m**)

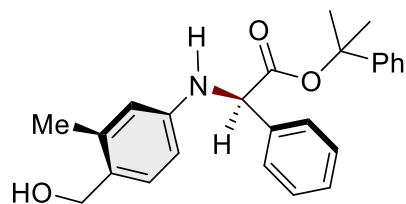

1

2 Pale yellow amorphous (55.3 mg, 71% yield, 96 : 4 e.r.); TLC Rf = 0.36 (n-hexane/EtOAc

3 2/1);  $^1\text{H NMR}$  (400 MHz,  $\text{CDCl}_3$ )  $\delta$  7.48 (dd,  $J = 8.0, 1.6\text{ Hz}$ , 2H), 7.33-7.40 (m, 3H),

4 7.15-7.19 (m, 3H), 7.02 (d,  $J = 8.4\text{ Hz}$ , 1H), 6.96-7.00 (m, 2H), 6.40 (d,  $J = 2.4\text{ Hz}$ , 1H),

5 6.31 (dd,  $J = 8.0, 2.4\text{ Hz}$ , 1H), 5.04 (s, 1H), 4.94 (s, 1H), 4.52 (s, 2H), 2.26 (s, 3H), 1.78

6 (s, 3H), 1.62 (s, 3H);  $^{13}\text{C NMR}$  (100 MHz,  $\text{CDCl}_3$ )  $\delta$  169.9, 145.8, 144.7, 137.9, 137.9,

7 129.8, 128.7 (2C), 128.2, 128.2 (2C), 127.3 (2C), 127.2, 124.0 (2C), 115.6, 110.3, 83.4,

8 63.6, 61.0, 29.7, 29.2, 27.5, 18.9; IR (ATR)  $\nu$  3407, 2925, 2853, 2369, 2351, 1736, 1615,

9 1509, 1453, 1384  $\text{cm}^{-1}$ ; HRMS (ESI-TOF)  $[\text{M} + \text{Na}]^+$  calcd for  $\text{C}_{25}\text{H}_{27}\text{NNaO}_3^+$  m/z

10 412.1883, found 412.1884.  $[\alpha]_D^{25} -57.5$  (c 0.08,  $\text{CHCl}_3$ ). The enantiomeric ratio was

11 determined by analytical chiral HPLC. Retention time: 10.8 min (major isomer), 15.0 min

12 (minor isomer), IBN-3 column, 85/15 *n*-hexane/IPA, 1.0 mL/min, 254 nm.

13

14 2-phenylpropan-2-yl (*R*)-2-((2-fluoro-4-(hydroxymethyl)phenyl)amino)-2-phenylacetate

15 (**9n**)

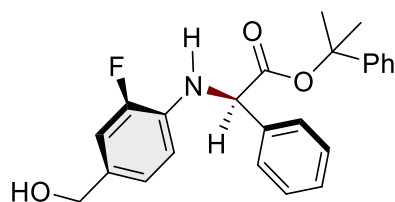

1

2 Pale yellow amorphous (78.7 mg, quant., yield, 95 : 5 e.r.); TLC Rf = 0.50 (n-  
 3 hexane/EtOAc 2/1); <sup>1</sup>H NMR (400 MHz, CDCl<sub>3</sub>) δ 7.47 (dd, *J* = 8.0, 1.6 Hz, 2H), 7.34-  
 4 7.41 (m, 3H), 7.14-7.19 (m, 3H), 6.95-7.01 (m, 3H), 6.83 (d, *J* = 8.0 Hz, 1H), 6.39 (t, *J* =  
 5 8.4 Hz, 1H), 5.24 (s, 2H), 5.06 (d, *J* = 5.6 Hz, 2H), 1.80 (s, 3H), 1.62 (s, 3H); <sup>13</sup>C NMR  
 6 (150 MHz, CDCl<sub>3</sub>) δ 169.4, 151.4 (d, *J* = 238.4 Hz), 144.6, 137.3, 133.9 (d, *J* = 11.6 Hz),  
 7 130.2 (d, *J* = 5.9 Hz), 128.8 (2C), 128.3, 128.1 (2C), 127.3 (2C), 127.2, 124.0 (2C), 123.3  
 8 (d, *J* = 3.0 Hz), 113.8 (d, *J* = 18.8 Hz), 112.8 (d, *J* = 2.9 Hz), 83.6, 64.7, 60.8, 29.3, 27.3;  
 9 <sup>19</sup>F NMR (376 MHz, CDCl<sub>3</sub>) δ -134.9; IR (ATR) ν 3418, 2929, 2369, 1738, 1632, 1530,  
 10 1496, 1455, 1367, 1319 cm<sup>-1</sup>; HRMS (ESI-TOF) [M + Na]<sup>+</sup> calcd for C<sub>24</sub>H<sub>24</sub>FNNaO<sub>3</sub><sup>+</sup>  
 11 m/z 416.1632, found 416.1645. [α]<sub>D</sub><sup>25</sup> -59.4 (c 0.39, CHCl<sub>3</sub>). The enantiomeric ratio was  
 12 determined by analytical chiral HPLC. Retention time: 12.3 min (major isomer), 19.2 min  
 13 (minor isomer), IC-3 column, 90/10 *n*-hexane/IPA, 1.0 mL/min, 254 nm.

14

15

16

1 **4. General Procedure for Light-promoted Asymmetric N–H Insertion**

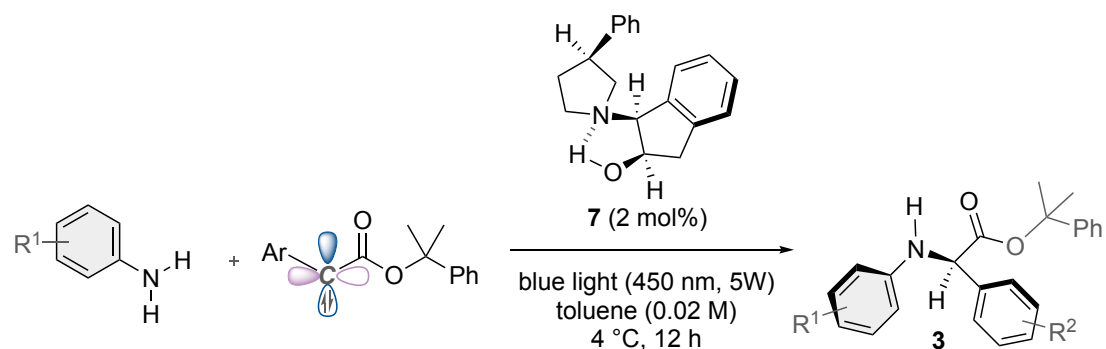

3 A 50-mL Schlenk tube was charged with aniline derivative (1.2 mmol), diazoester  
4 derivative (0.2 mmol), chiral catalyst (7, 1.1 mg, 0.004 mmol), and toluene (10.0 mL).  
5 The reaction mixture was irradiated with 450 nm light from a 5 W LED at 4 °C for 12 h.  
6 The solvent was removed under reduced pressure, and the crude residue was purified by  
7 flash column chromatography on silica gel (*n*-hexane/EtOAc = 15:1) to afford the  
8 corresponding products.

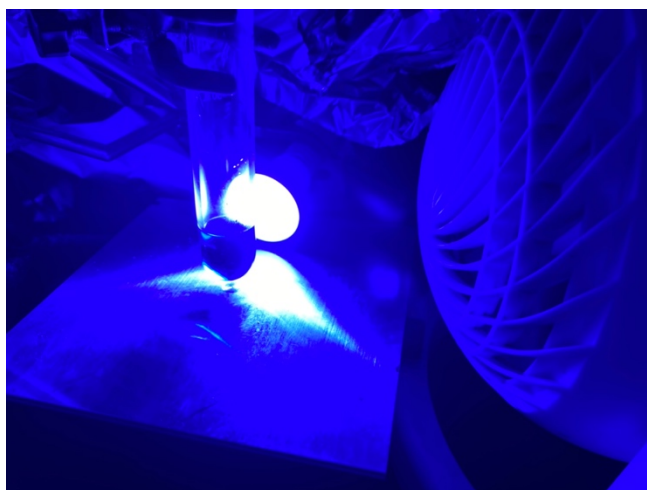

(in a cold room at 4 °C)

1 2-phenylpropan-2-yl (*R*)-2-((4-bromophenyl)amino)-2-phenylacetate (**3a**)

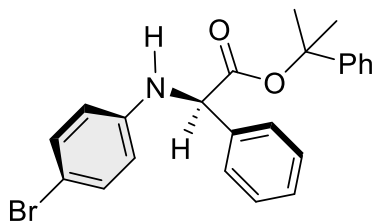

2  
3 White solid (62.8 mg, 74% yield, 95 : 5 e.r.). The spectroscopic and analytical data,  
4 including  $^1\text{H}$  NMR,  $^{13}\text{C}$  NMR, IR, and HRMS, were consistent with those of the product  
5 obtained from the ruthenium-catalyzed reaction.

6

7 2-phenylpropan-2-yl (*R*)-2-((4-cyanophenyl)amino)-2-phenylacetate (**3h**)

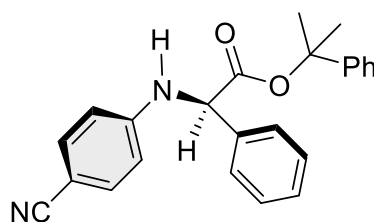

8  
9 Colorless amorphous (51.9 mg, 70% yield, 91 : 9 e.r.). The spectroscopic and analytical  
10 data, including  $^1\text{H}$  NMR,  $^{13}\text{C}$  NMR, IR, and HRMS, were consistent with those of the  
11 product obtained from the ruthenium-catalyzed reaction.

12

13 2-phenylpropan-2-yl (*R*)-2-phenyl-2-(*o*-tolylamino)acetate (**3j**)

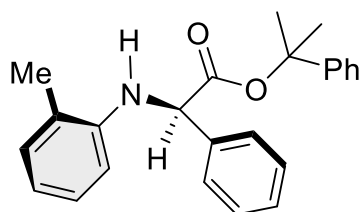

1

2 Yellow solid (48.2 mg, 67% yield, 91 : 9 e.r.). The spectroscopic and analytical data,  
 3 including  $^1\text{H}$  NMR,  $^{13}\text{C}$  NMR, IR, and HRMS, were consistent with those of the product  
 4 obtained from the ruthenium-catalyzed reaction.

5

6 ethyl *(R)*-3-benzoyl-4-((2-oxo-1-phenyl-2-((2-phenylpropan-2-  
 7 yl)oxy)ethyl)amino)benzoate (**3z**)

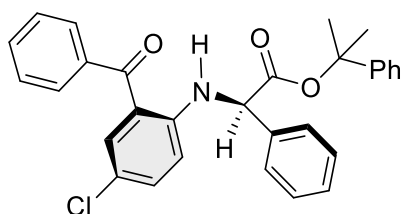

8

9 Yellow solid (50.3 mg, 52% yield, 88 : 12 e.r.). The spectroscopic and analytical data,  
 10 including  $^1\text{H}$  NMR,  $^{13}\text{C}$  NMR, IR, and HRMS, were consistent with those of the product  
 11 obtained from the ruthenium-catalyzed reaction.

12

13 2-phenylpropan-2-yl *(R)*-2-((2-benzoyl-4-bromophenyl)amino)-2-phenylacetate (**3ae**)

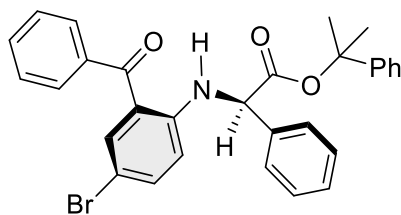

1  
 2 Yellow amorphous (52.8 mg, 50% yield, 89 : 11 e.r.); TLC Rf = 0.33(n-hexane/EtOAc,  
 3 10/1); <sup>1</sup>H NMR (400 MHz, CDCl<sub>3</sub>) δ 9.47 (d, *J* = 5.6 Hz, 1H), 7.58-7.65 (m, 3H), 7.43-  
 4 7.57 (m, 5H), 7.33-7.43 (m, 3H), 7.30 (dd, *J* = 9.0, 2.2 Hz, 1H), 7.11-7.18 (m, 3H), 6.95-  
 5 7.02 (m, 2H), 6.43 (d, *J* = 9.2 Hz, 1H), 5.14 (d, *J* = 5.6 Hz, 1H) 1.80 (s, 3H), 1.66 (s, 3H);  
 6 <sup>13</sup>C NMR (150 MHz, CDCl<sub>3</sub>) δ 197.8, 168.5, 148.0, 144.7, 139.4, 137.1, 136.9, 131.4,  
 7 129.2 (2C), 128.9 (2C), 128.5, 128.2 (2C), 128.1 (2C), 127.3 (2C), 127.2, 127.1, 124.1  
 8 (2C), 119.8, 114.5, 106.2, 83.7, 60.9, 29.2, 27.4 ; IR (ATR) ν 3390, 2979, 2926, 2870,  
 9 1717, 1661, 1596, 1518, 1496, 1468 cm<sup>-1</sup>; HRMS (ESI-TOF) [M + Na]<sup>+</sup> calcd for  
 10 C<sub>30</sub>H<sub>26</sub>BrNNaO<sub>3</sub><sup>+</sup> m/z 550.0988, found 550.1001. [α]<sub>D</sub><sup>25</sup> +53.2 (c 0.37, CHCl<sub>3</sub>). The  
 11 enantiomeric ratio was determined by analytical chiral HPLC. Retention time: 8.9 min  
 12 (major isomer), 13.1 min (minor isomer), IBN-3 column, 98/2 *n*-hexane/IPA, 1.0 mL/min,  
 13 254 nm.  
 14  
 15 ethyl (*R*)-4-((2-oxo-1-phenyl-2-((2-phenylpropan-2-yl)oxy)ethyl)amino)benzoate (**3y**)

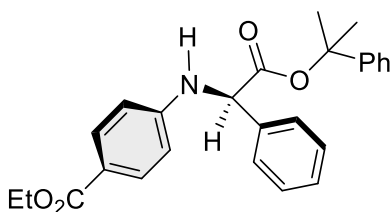

1

2 Colorless oil (70.3 mg, 68% yield, 95 : 5 e.r.). The spectroscopic and analytical data,  
 3 including  $^1\text{H}$  NMR,  $^{13}\text{C}$  NMR, IR, and HRMS, were consistent with those of the product  
 4 obtained from the ruthenium-catalyzed reaction.

5

6 2-phenylpropan-2-yl (*R*)-2-(naphthalen-1-ylamino)-2-phenylacetate (**3o**)

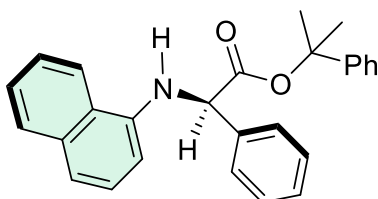

7

8 Colorless amorphous (50.6 mg, 64% yield, 83 : 17 e.r.). The spectroscopic and analytical  
 9 data, including  $^1\text{H}$  NMR,  $^{13}\text{C}$  NMR, IR, and HRMS, were consistent with those of the  
 10 product obtained from the ruthenium-catalyzed reaction.

11

12 ethyl (*R*)-4-((1-(naphthalen-2-yl)-2-oxo-2-((2-phenylpropan-2-  
 13 yl)oxy)ethyl)amino)benzoate (**3af**)

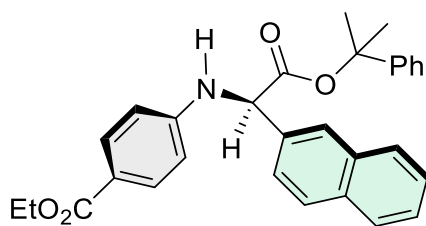

1

2 Colorless amorphous (66.1 mg, 73% yield, 94 : 6 e.r.); TLC Rf = 0.41 (n-hexane/EtOAc

3 4/1); <sup>1</sup>H NMR (600 MHz, CDCl<sub>3</sub>) δ 7.85-7.92 (m, 3H), 7.82 (dd, *J* = 6.0, 3.0 Hz, 1H),

4 7.78 (d, *J* = 9.0 Hz, 2H), 7.58 (d, *J* = 8.4 Hz, 1H), 7.49-7.53 (m, 2H), 7.15 (t, *J* = 7.2 Hz,

5 1H), 7.07 (t, *J* = 7.8 Hz, 2H), 6.94 (d, *J* = 8.4 Hz, 2H), 6.52 (d, *J* = 8.4 Hz, 2H), 5.52 (d,

6 *J* = 4.8 Hz, 1H), 5.25 (d, *J* = 4.8 Hz, 1H), 4.26 (q, *J* = 7.2 Hz, 2H), 1.79 (s, 3H), 1.61 (s,

7 3H), 1.30 (t, *J* = 7.2 Hz, 3H); <sup>13</sup>C NMR (100 MHz, CDCl<sub>3</sub>) δ 169.4, 166.6, 149.4, 144.4,

8 134.5, 133.3, 133.2, 131.3 (2C), 128.7, 128.1 (2C), 128.0, 127.7, 127.2, 126.5, 126.4,

9 126.3, 124.9, 124.0 (2C), 119.4, 112.3 (2C), 84.0, 60.5, 60.1, 29.0, 27.5, 14.3; IR (ATR)

10 ν 3391, 2980, 2932, 1734, 1700, 1605, 1578, 1524, 1496, 1478 cm<sup>-1</sup>; HRMS (ESI-TOF)

11 [M + Na]<sup>+</sup> calcd for C<sub>30</sub>H<sub>29</sub>NNaO<sub>4</sub><sup>+</sup> m/z 490.1989, found 490.1984. [α]<sub>D</sub><sup>25</sup> -94.8 (c 0.57,

12 CHCl<sub>3</sub>). The enantiomeric ratio was determined by analytical chiral HPLC. Retention

13 time: 10.2 min (major isomer), 12.8 min (minor isomer), IC-3 column, 75/25 *n*-

14 hexane/IPA, 1.0 mL/min, 254 nm.

15

16 2-phenylpropan-2-yl (*R*)-2-((4-chlorophenyl)amino)-2-(naphthalen-2-yl)acetate (**3ag**)

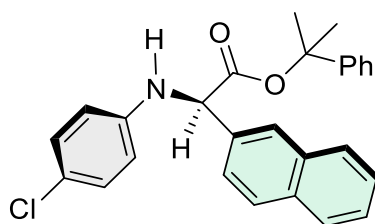

1  
 2 White solid (62.2mg, 75% yield, 93 : 7 e.r.); m.p. 72-74 °C; TLC R<sub>f</sub> = 0.35 (n-  
 3 hexane/EtOAc 4/1); <sup>1</sup>H NMR (600 MHz, CDCl<sub>3</sub>) δ 7.91 (s, 1H), 7.85-7.89 (m, 2H), 7.81-  
 4 7.84 (m, 1H), 7.58 (dd, *J* = 8.4, 1.8 Hz, 1H), 7.49-7.53 (m, 2H), 7.14 (t, *J* = 7.2 Hz, 1H),  
 5 7.07 (t, *J* = 7.2 Hz, 1H), 7.02 (d, *J* = 9.0 Hz, 2H), 6.92-6.95 (m, 2H), 6.47 (d, *J* = 8.4 Hz,  
 6 2H), 5.15 (d, *J* = 5.4 Hz, 1H), 5.09 (d, *J* = 5.4 Hz, 1H), 1.78 (s, 3H), 1.60 (s, 3H); <sup>13</sup>C  
 7 NMR (150 MHz, CDCl<sub>3</sub>) δ 169.7, 144.5, 144.4, 134.9, 133.3, 133.3, 129.0 (2C), 128.7,  
 8 128.1 (2C), 128.0, 127.7, 127.2, 126.5, 126.3, 126.3, 125.1, 124.0 (2C), 122.4, 114.5 (2C),  
 9 83.8, 61.2, 29.0, 27.6; IR (ATR) ν 3405, 3056, 2980, 1733, 1600, 1448, 1384, 1367, 1323,  
 10 1274 cm<sup>-1</sup>; HRMS (ESI-TOF) [M + Na]<sup>+</sup> calcd for C<sub>27</sub>H<sub>24</sub>ClNNaO<sub>2</sub><sup>2+</sup> m/z 452.1388,  
 11 found 452.1387. [α]<sub>D</sub><sup>25</sup> -109.9 (c 0.53, CHCl<sub>3</sub>). The enantiomeric ratio was determined  
 12 by analytical chiral HPLC. Retention time: 10.8 min (major isomer), 18.2 min (minor  
 13 isomer), IBN-3 column, 95/5 *n*-hexane/IPA, 1.0 mL/min, 254 nm.  
 14  
 15 2-phenylpropan-2-yl (*R*)-2-((4-cyanophenyl)amino)-2-(naphthalen-2-yl)acetate (**3ah**)

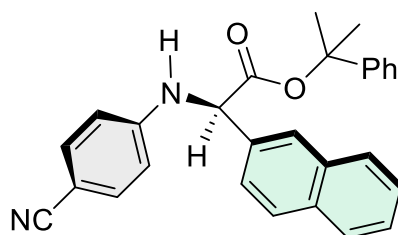

1

2 Colorless amorphous (64.8mg, 77% yield, 93 : 7 e.r.); TLC Rf = 0.41 (n-hexane/EtOAc

3 4/1); <sup>1</sup>H NMR (600 MHz, CDCl<sub>3</sub>) δ 7.85-7.90 (m, 3H), 7.80-7.83 (m, 1H), 7.55 (d, *J* =

4 8.4 Hz, 1H), 7.50-7.53 (m, 2H), 7.30 (d, *J* = 9.0 Hz, 2H), 7.14 (t, *J* = 7.2 Hz, 1H), 7.05 (t,

5 *J* = 7.2 Hz, 2H), 6.92 (d, *J* = 8.4 Hz, 2H), 6.50 (d, *J* = 9.0 Hz, 2H), 5.65 (s, 1H), 5.20 (d,

6 *J* = 4.8 Hz, 1H), 1.79 (s, 3H), 1.59 (s, 3H); <sup>13</sup>C NMR (150 MHz, CDCl<sub>3</sub>) δ 169.1, 148.8,

7 144.2, 134.0, 133.6 (2C), 133.3, 128.9, 128.1 (2C), 128.0, 127.7, 127.3, 126.5, 126.5,

8 126.4, 124.7, 124.7, 124.0 (2C), 120.1, 113.1 (2C), 99.6, 84.2, 60.3, 29.0, 27.5 ; IR (ATR)

9 ν 3385, 3058, 2982, 2215, 1734, 1574, 1496, 1474, 1448, 1385 cm<sup>-1</sup>; HRMS (ESI-TOF)

10 [M + Na]<sup>+</sup> calcd for C<sub>28</sub>H<sub>24</sub>N<sub>2</sub>NaO<sub>2</sub><sup>2+</sup> m/z 443.1730, found 443.1746. [α]<sub>D</sub><sup>25</sup> -128.0 (c

11 0.57, CHCl<sub>3</sub>). The enantiomeric ratio was determined by analytical chiral HPLC.

12 Retention time: 14.0 min (major isomer), 19.3 min (minor isomer), IBN-3 column, 80/20

13 *n*-hexane/IPA, 1.0 mL/min, 254 nm.

14

15 2-phenylpropan-2-yl (*R*)-2-((4-bromophenyl)amino)-2-(naphthalen-2-yl)acetate (**3p**)

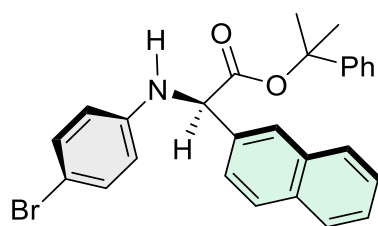

1

2 White solid (68.2 mg, 72% yield, 95 : 5 e.r.). The spectroscopic and analytical data,

3 including  $^1\text{H}$  NMR,  $^{13}\text{C}$  NMR, IR, and HRMS, were consistent with those of the product

4 obtained from the ruthenium-catalyzed reaction.

5

6

1    **5.    Deuterium Labelling Experiment**

2    *N*-deuterium-labeled aniline derivative was synthesized according to the following  
3    procedure. In a dried 30-mL eggplant-shaped flask, aniline derivative (0.66 mmol) was  
4    dissolved in CD<sub>3</sub>OD (1.0 mL, 0.66 M), and the solution was stirred at room temperature  
5    for 4 hours. Then the solution was concentrated under vacuum to remove the solvent.  
6    CD<sub>3</sub>OD (1.0 mL) was added into the flask again and the solution was stirred at room  
7    temperature for another 4 hours. After that, the resulting solution was concentrated under  
8    vacuum to give the desired product in quantitative yield.

9

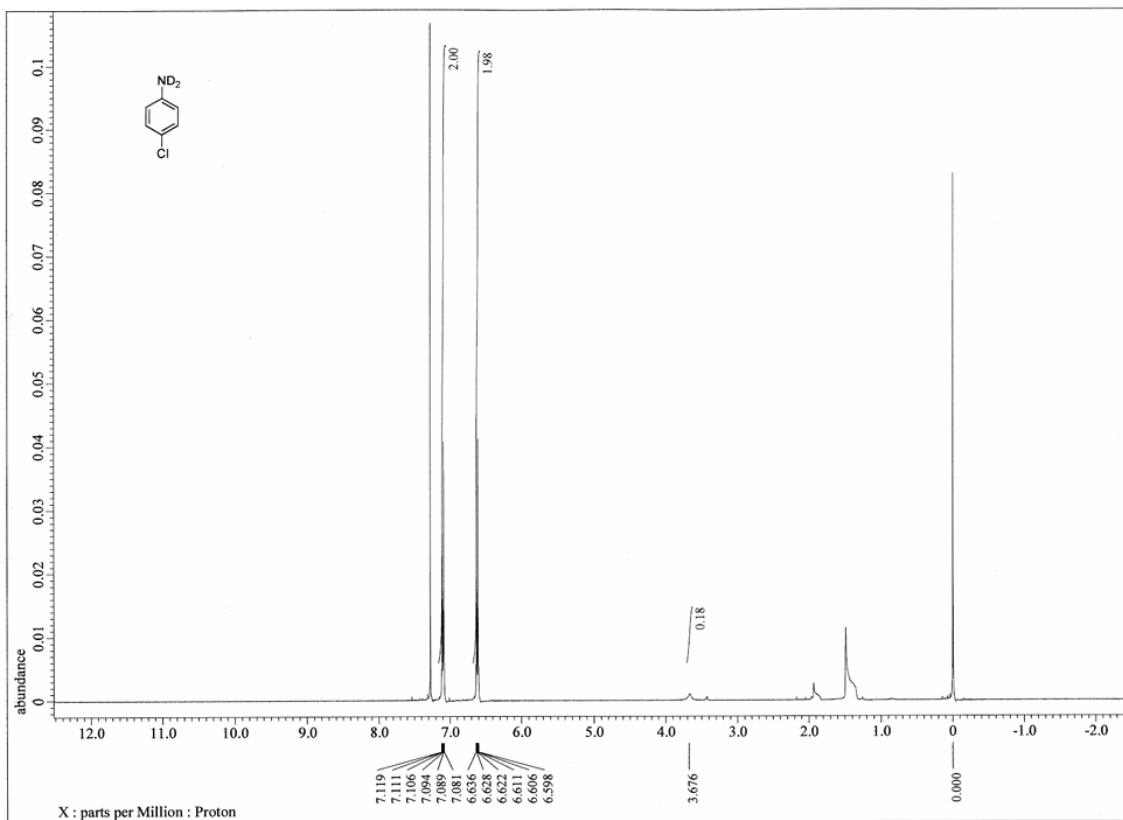

1

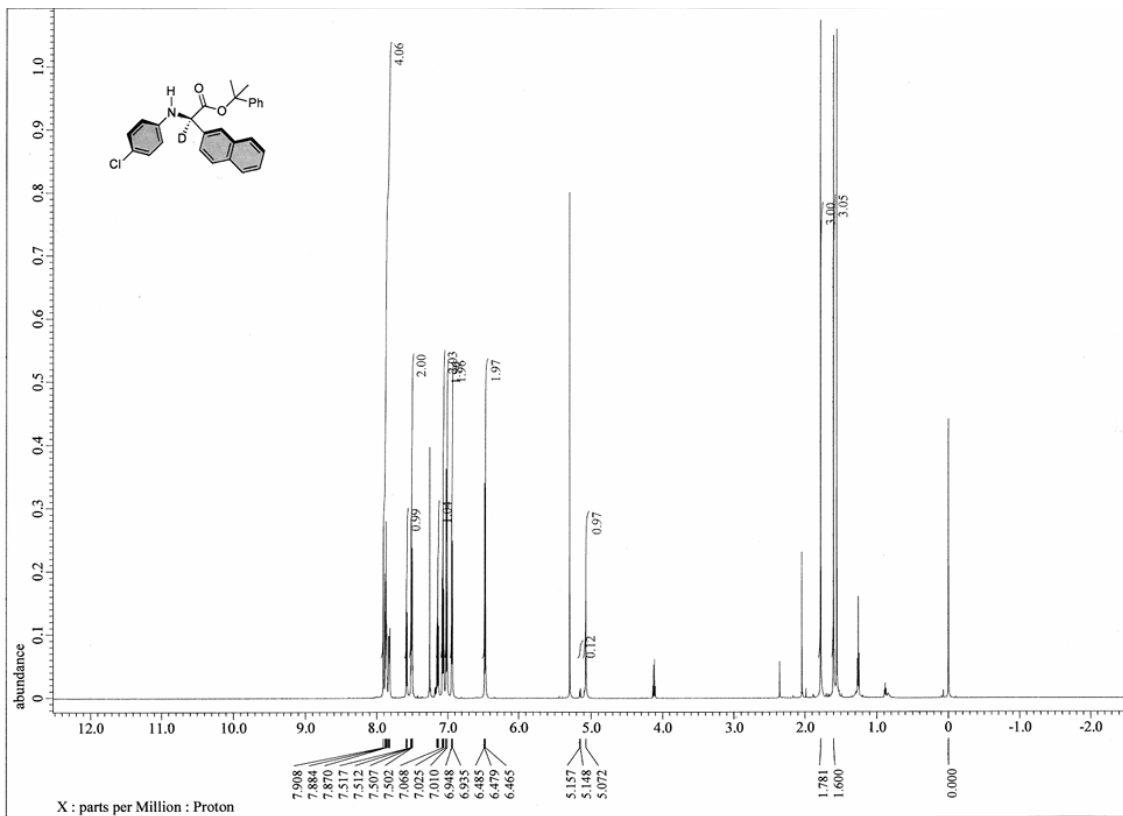

2

3

1

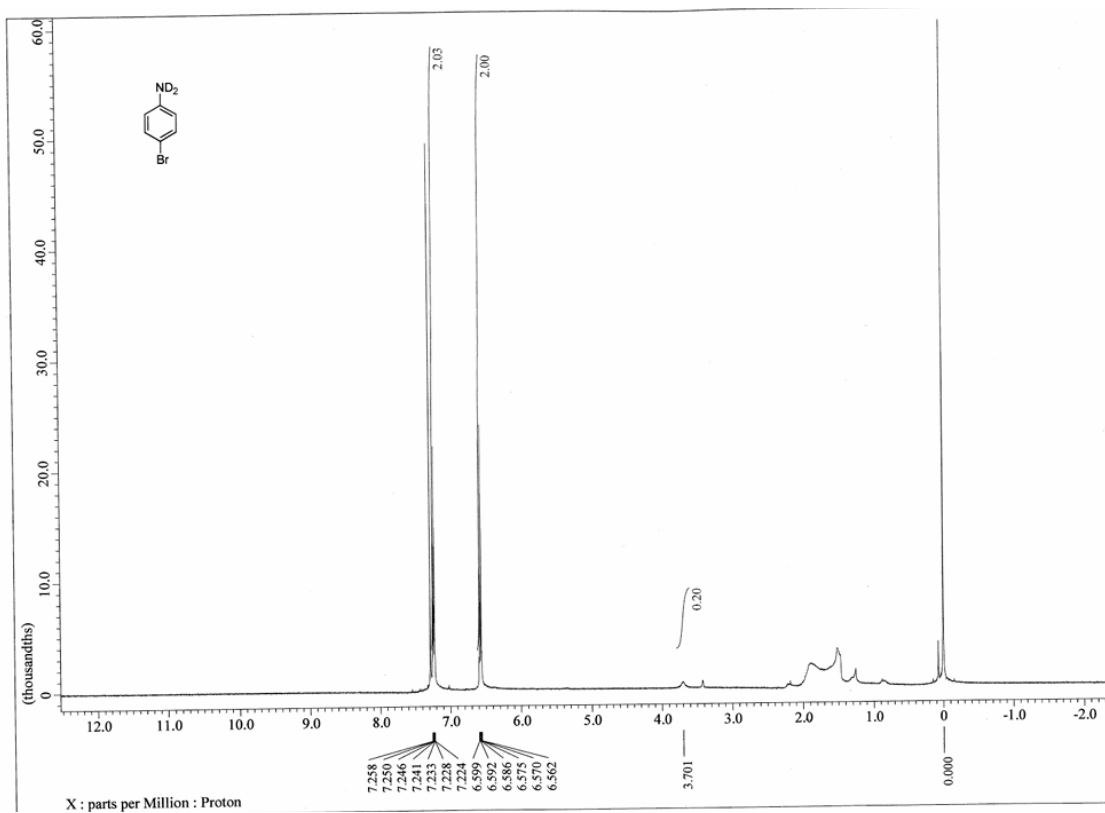

2

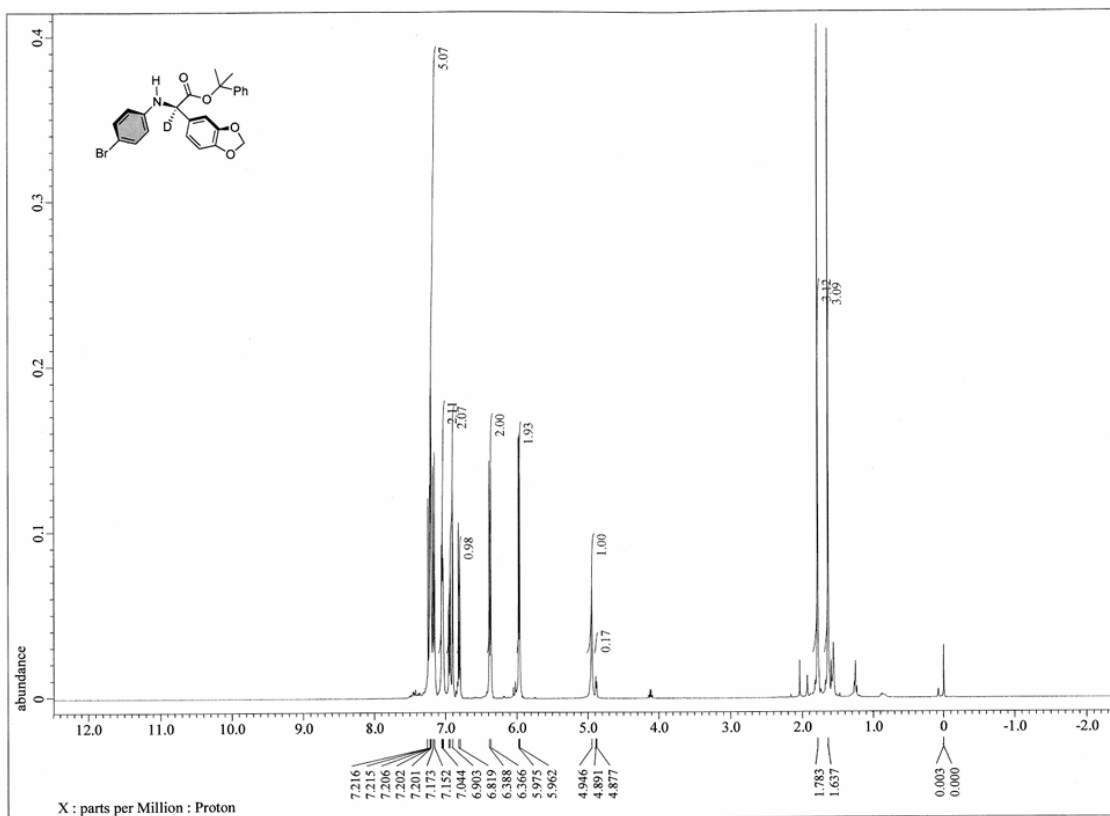

3

1 **6. Synthesis of Catalyst and Substrates**

2 Catalyst **7** was synthesized by reducing the corresponding reported amide precursor<sup>1</sup>.

3

4 (1*S*,2*R*)-1-((*S*)-3-phenylpyrrolidin-1-yl)-2,3-dihydro-1*H*-inden-2-ol (**7**)

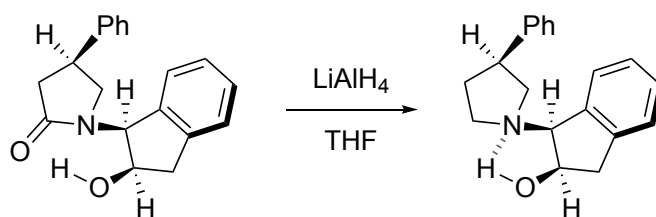

5

6 LiAlH<sub>4</sub> (113.1 mg, 2.98 mmol, 2.0 equiv.) was added to a solution of (*S*)-1-((1*S*,2*R*)-2-

7 hydroxy-2,3-dihydro-1*H*-inden-1-yl)-4-phenylpyrrolidin-2-one (437.1 mg, 1.49 mmol,

8 1.00 equiv.) in THF (5 mL). The mixture was stirred at 50 °C for 20 h. The reaction

9 mixture was allowed to cool down to room temperature and water (10 mL) and CH<sub>2</sub>Cl<sub>2</sub>

10 (10 mL) were added. The layers were separated and the aqueous phase was extracted with

11 CH<sub>2</sub>Cl<sub>2</sub> (3 × 5 mL). The combined organic layers were dried over MgSO<sub>4</sub>, and

12 concentrated. The residue was purified by flash chromatography on silica to afford **7** as a

13 solid (291.4 mg, 70% yield).

14 m.p. 65-67 °C; TLC R<sub>f</sub> = 0.25 (n-hexane/EtOAc, 1/1); <sup>1</sup>H NMR (600 MHz, CDCl<sub>3</sub>) δ

15 7.36 (d, *J* = 7.2 Hz, 1H), 7.24-7.29 (m, 3H), 7.16-7.23 (m, 5H), 4.44 (dd, *J* = 7.5, 7.5 Hz,

16 1H), 4.30 (d, *J* = 7.8 Hz, 1H), 3.29 (quint, *J* = 8.4 Hz, 1H), 3.19 (dd, *J* = 15.9, 7.5 Hz,

17 1H), 3.05 (t, *J* = 8.1 Hz, 1H), 2.95-3.00 (m, 1H), 2.88 (t, *J* = 8.0 Hz, 1H), 2.75-2.83 (m,

1 2H), 2.23-2.29 (m, 1H), 1.83-1.90 (m, 1H); <sup>13</sup>C NMR (100 MHz, CDCl<sub>3</sub>) δ 144.6, 142.0,  
2 138.8, 128.7 (2C), 128.6, 127.3 (2C), 126.8, 126.4, 126.3, 125.6, 70.6, 66.6, 58.7, 50.7,  
3 43.2, 40.9, 33.0; IR (ATR) ν 3310, 3063, 3025, 2916, 2819, 1602, 1493, 1479, 1457, 1401  
4 cm<sup>-1</sup>; HRMS (ESI-TOF) [M + H]<sup>+</sup> calcd for C<sub>19</sub>H<sub>22</sub>NO<sup>+</sup> m/z 280.1696, found 280.1695.  
5 [α]<sub>D</sub><sup>25</sup> +38.1 (c 1.0, CHCl<sub>3</sub>).

6  
7 For the preparation of substrates, known compounds were synthesized according to  
8 literature procedures<sup>2,3</sup>, and unknown compounds were synthesized according to the  
9 following general procedures.

10

### 11 **General Procedure A for the Synthesis of Phenylpropan-2-yl 2-Phenylacetates**

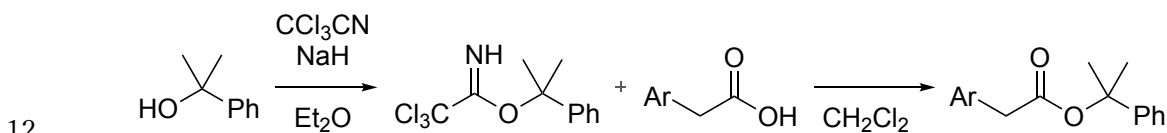

13 Sodium hydride (240 mg, 10 mmol) was suspended in anhydrous ether (1.5 mL) and a  
14 solution of 2-phenyl-2-propanol (1.36 g, 10 mmol) in ether (1.0 mL) was added dropwise  
15 with stirring under an Ar atmosphere. After the solids dissolved, the solution was cooled  
16 to 0 °C. Trichloroacetonitrile (1.05 mL, 10.5 mmol) was added dropwise and the reaction  
17 mixture was allowed to return to room temperature for 1 hour. The reaction mixture was  
18 quenched with MeOH and concentrated to a syrup. The mixture was filtered and the filter

1 cake was washed with pentane (20 mL × 2). The filtrate was concentrated to give the  
2 crude imidate that was used for the next step without further purification. The imidate  
3 was added to 2-phenylacetic acid (1.2 g, 8.8 mmol) in dry CH<sub>2</sub>Cl<sub>2</sub> under Ar at room  
4 temperature. The mixture was stirred for 12 h and filtered to remove trichloroacetamide.  
5 The filter cake was washed with CH<sub>2</sub>Cl<sub>2</sub>. The combined organic layer was concentrated.  
6 The residue was purified by flash chromatography on silica to afford the product as an  
7 oil.

9 2-phenylpropan-2-yl 2-(4-chlorophenyl)acetate (**e1**)

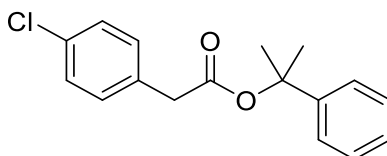

10

11 Prepared according to the General Procedure A using (4-chlorophenyl)acetic acid (341.2  
12 mg, 2.0 mmol) and isolated as colorless oil (381.2 mg, 66% yield); TLC R<sub>f</sub> = 0.42 (n-  
13 hexane/EtOAc, 6/1); <sup>1</sup>H NMR (400 MHz, CDCl<sub>3</sub>) δ 7.29-7.19 (m, 9H), 3.55 (s, 2H), 1.74  
14 (s, 6H); <sup>13</sup>C NMR (100 MHz, CDCl<sub>3</sub>) δ 169.7, 145.6, 133.0, 132.9, 130.8 (2C), 128.7  
15 (2C), 128.3 (2C), 127.2, 124.3 (2C), 82.4, 42.0, 28.6 (2C); IR (ATR) ν 3090, 3062, 3030,  
16 2981, 2939, 2368, 2342, 2310, 1733, 1601 cm<sup>-1</sup>; HRMS (ESI-TOF) [M + Na]<sup>+</sup> calcd for  
17 C<sub>17</sub>H<sub>17</sub>ClO<sub>2</sub><sup>+</sup> m/z 311.0809, found 311.0827.

1

2 2-phenylpropan-2-yl 2-(4-(trifluoromethyl)phenyl)acetate (**e2**)

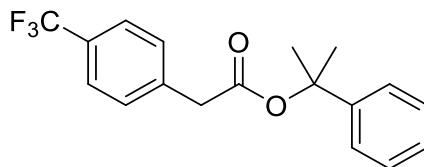

3

4 Prepared according to the General Procedure A using 4-(trifluoromethyl)benzeneacetic

5 acid (510.4 mg, 2.5 mmol) and isolated as colorless oil (475.4 mg, 59% yield); TLC Rf =

6 0.36 (n-hexane/EtOAc, 8/1); <sup>1</sup>H NMR (400 MHz, CDCl<sub>3</sub>) δ 7.58 (d, *J* = 7.8 Hz, 2H), 7.38

7 (d, *J* = 8.2 Hz, 2H), 7.22-7.29 (m, 5H), 3.65 (s, 2H), 1.76 (s, 6H); <sup>13</sup>C NMR (100 MHz,

8 CDCl<sub>3</sub>) δ 169.2, 145.3, 138.2, 129.7 (2C), 129.3 (d, *J* = 31.6 Hz), 128.3 (2C), 127.1, 126.3

9 (d, *J* = 166.8 Hz), 125.5 (q, *J* = 3.8 Hz, 2C), 124.2 (2C), 82.5, 42.3, 28.5 (2C); <sup>19</sup>F NMR

10 (376 MHz, CDCl<sub>3</sub>) δ -62.4; IR (ATR) ν 3548, 2983, 2936, 2364, 2351, 2325, 1733, 1619,

11 1585, 1496 cm<sup>-1</sup>; HRMS (ESI-TOF) [M + Na]<sup>+</sup> calcd for C<sub>18</sub>H<sub>17</sub>F<sub>3</sub>NaO<sub>2</sub><sup>+</sup> m/z 345.1073,

12 found 345.1079.

13

14 2-phenylpropan-2-yl 2-(*p*-tolyl)acetate (**e3**)

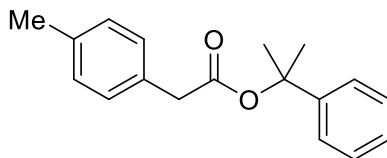

15

16 Prepared according to the General Procedure A using *p*-tolylacetic acid (300.4 mg, 2.0

17 mmol) and isolated as colorless oil (322.0 mg, 60% yield); TLC Rf = 0.50 (n-

1 hexane/EtOAc, 8/1);  $^1\text{H}$  NMR (400 MHz,  $\text{CDCl}_3$ )  $\delta$  7.11-7.28 (m, 9H), 3.54 (s, 2H), 2.33  
2 (s, 3H), 1.74 (s, 6H);  $^{13}\text{C}$  NMR (100 MHz,  $\text{CDCl}_3$ )  $\delta$  170.4, 145.9, 136.6, 131.4, 129.3  
3 (4C), 128.3 (2C), 127.0, 124.3 (2C), 82.0, 42.3, 28.7 (2C), 21.2 ; IR (ATR)  $\nu$  3090, 3055,  
4 3027, 2979, 2924, 2868, 2368, 2330, 1732, 1604  $\text{cm}^{-1}$ ; HRMS (ESI-TOF)  $[\text{M} + \text{H}]^+$  calcd  
5 for  $\text{C}_{18}\text{H}_{21}\text{O}_2^+$   $m/z$  269.1536, found 269.1543.

6

7 2-phenylpropan-2-yl 2-(3-methoxyphenyl)acetate (**e4**)

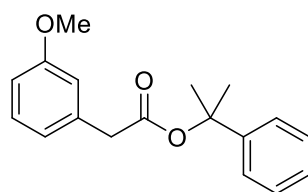

8

9 Prepared according to the General Procedure A using (3-methoxyphenyl)acetic acid  
10 (332.3 mg, 2.0 mmol) and isolated as colorless oil (261.6 mg, 46% yield); TLC  $R_f$  = 0.27  
11 (n-hexane/EtOAc, 8/1);  $^1\text{H}$  NMR (400 MHz,  $\text{CDCl}_3$ )  $\delta$  7.29-7.19 (m, 6H), 6.86 (d,  $J$  =  
12 7.8 Hz, 1H), 6.80-6.82 (m, 2H), 3.78 (s, 3H), 3.56 (s, 2H), 1.75 (s, 6H);  $^{13}\text{C}$  NMR (100  
13 MHz,  $\text{CDCl}_3$ )  $\delta$  170.0, 159.7, 145.7, 135.8, 129.6, 128.3 (2C) , 127.1, 124.3 (2C) , 121.8,  
14 114.8, 112.8, 82.1, 55.3, 42.8, 28.6 (2C); IR (ATR)  $\nu$  3060, 2980, 2938, 2835, 2363, 2343,  
15 1732, 1601, 1585, 1492  $\text{cm}^{-1}$ ; HRMS (ESI-TOF)  $[\text{M} + \text{Na}]^+$  calcd for  $\text{C}_{18}\text{H}_{20}\text{NaO}_3^+$   $m/z$   
16 307.1305, found 307.1321.

17

1 2-phenylpropan-2-yl 2-(naphthalen-2-yl)acetate (**e5**)

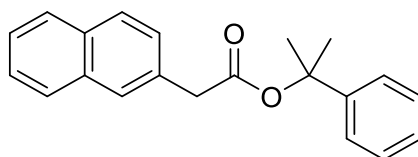

2

3 Prepared according to the General Procedure A using 2-naphthaleneacetic acid (744.8 mg,  
4 4.0 mmol) and isolated as white solid (608.8 mg, 50% yield); m.p. 39-41 °C; TLC Rf =  
5 0.50 (n-hexane/EtOAc, 8/1); <sup>1</sup>H NMR (400 MHz, CDCl<sub>3</sub>) δ 7.77-7.83 (m, 3H), 7.71 (s,  
6 1H), 7.40-7.47 (m, 3H), 7.18-7.23 (m, 5H), 3.75 (s, 2H), 1.75 (s, 6H); <sup>13</sup>C NMR (100 MHz,  
7 CDCl<sub>3</sub>) δ 170.1, 145.7, 133.6, 132.5, 131.9, 128.3 (2C), 128.2, 128.1, 127.8 (2C), 127.6,  
8 127.1, 126.2, 125.8, 124.3 (2C), 82.2, 42.9, 28.7 (2C); IR (ATR) ν 3840, 3056, 3023,  
9 2979, 2932, 2367, 2355, 2308, 1731, 1634 cm<sup>-1</sup>; HRMS (ESI-TOF) [M + Na]<sup>+</sup> calcd for  
10 C<sub>21</sub>H<sub>20</sub>NaO<sub>2</sub><sup>+</sup> m/z 327.1356, found 327.1359.

11

12 2-phenylpropan-2-yl 2-(m-tolyl)acetate (**e6**)

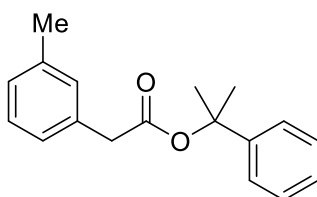

13

14 Prepared according to the General Procedure A using (3-methylphenyl)acetic acid (750.9  
15 mg, 5.0 mmol) and isolated as colorless oil (872.2 mg, 65% yield) : TLC Rf = 0.56 (n-  
16 hexane/EtOAc, 6/1); <sup>1</sup>H NMR (400 MHz, CDCl<sub>3</sub>) δ 7.18-7.28 (m, 6H), 7.07 (d, *J* = 6.9

1 Hz, 3H), 3.55 (s, 2H), 2.33 (s, 3H), 1.75 (s, 6H);  $^{13}\text{C}$  NMR (100 MHz,  $\text{CDCl}_3$ )  $\delta$  170.1,  
2 145.7, 138.0, 134.1, 130.0, 128.3, 128.1 (2C), 127.6, 126.9, 126.3, 124.2 (2C), 81.9, 42.7,  
3 28.5 (2C), 21.3; IR (ATR)  $\nu$  3841, 3648, 3566, 3062, 3017, 2983, 2941, 2868, 2367, 2352  
4  $\text{cm}^{-1}$ ; HRMS (ESI-TOF)  $[\text{M} + \text{Na}]^+$  calcd for  $\text{C}_{18}\text{H}_{20}\text{NaO}_2^+$  m/z 291.1356, found  
5 291.1364.  
6

1 **General Procedure B for the Synthesis of  $\alpha$ -Diazoesters**

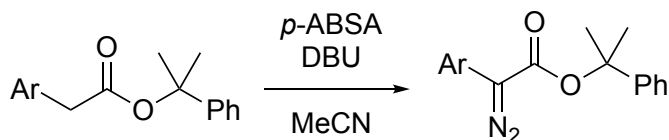

4 To a stirred suspension of 2-phenylpropan-2-yl 2-phenylacetate (5.0 mmol, 1 equiv.) and  
5 4-acetamidobenzenesulfonyl azide (*p*-ABSA) (2.88 g, 6 mmol, 1.2 equiv.) in CH<sub>3</sub>CN (15  
6 mL) at 0 °C, DBU (1.05 mL, 7 mmol, 1.4 equiv.) was added under an Ar atmosphere.  
7 After stirring for 12 h, the reaction mixture was quenched with saturated NH<sub>4</sub>Cl solution  
8 and extracted with Et<sub>2</sub>O. The organic phase was dried over Na<sub>2</sub>SO<sub>4</sub> and evaporated to  
9 give the crude product. Purification by column chromatography gave the  $\alpha$ -alkyl  
10 diazoester as a yellow solid.

11 2-phenylpropan-2-yl 2-(4-chlorophenyl)-2-diazoacetate (**d1**)

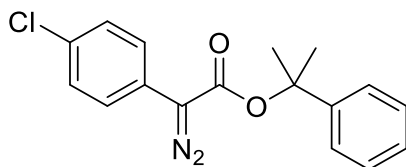

13 Prepared according to the General Procedure B using **e1** (346.5 mg, 1.2 mmol) and  
14 isolated as yellow solid (313.5 mg, 83% yield); m.p. 35-37 °C; TLC R<sub>f</sub> = 0.64 (n-  
15 hexane/EtOAc, 10/1); <sup>1</sup>H NMR (400 MHz, CDCl<sub>3</sub>)  $\delta$  7.41-7.25 (m, 9H), 1.86 (s, 6H); <sup>13</sup>C  
16 NMR (100 MHz, CDCl<sub>3</sub>)  $\delta$  163.6, 145.5, 131.3, 129.1 (2C), 128.5 (2C), 127.3 (2C), 125.1

1 (2C), 124.5, 124.3 (2C), 83.4, 29.0 (2C); IR (ATR)  $\nu$  3869, 3065, 3019, 2985, 2945, 2366,  
2 2307, 2085, 1699, 1495  $\text{cm}^{-1}$ ; HRMS (ESI-TOF)  $[\text{M} + \text{Na}]^+$  calcd for  $\text{C}_{17}\text{H}_{15}\text{ClN}_2\text{NaO}_2^+$   
3  $m/z$  337.0714, found 337.0707.

4

5 2-phenylpropan-2-yl 2-diazo-2-(4-(trifluoromethyl)phenyl)acetate (**d2**)

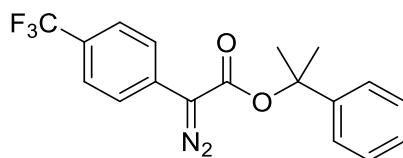

6

7 Prepared according to the General Procedure B using **e2** (419.0 mg, 1.3 mmol) and

8 isolated as yellow oil (343.2 mg, 76% yield); TLC  $R_f$  = 0.50 (n-hexane/EtOAc, 10/1);  $^1\text{H}$

9 NMR (400 MHz,  $\text{CDCl}_3$ )  $\delta$  7.54 (s, 4H), 7.39-7.42 (m, 2H), 7.33-7.37 (m, 2H), 7.24-7.28

10 (m, 1H), 1.87 (s, 6H);  $^{13}\text{C}$  NMR (100 MHz,  $\text{CDCl}_3$ )  $\delta$  163.1, 145.4, 130.5, 128.6 (3C),

11 127.5, 125.8 (2C), 124.3 (3C), 123.5 (3C), 83.7, 29.0 (2C);  $^{19}\text{F}$  NMR (376 MHz,  $\text{CDCl}_3$ )

12  $\delta$  -62.3; IR (ATR)  $\nu$  3594, 3063, 2983, 2938, 2363, 2326, 2085, 1703, 1614, 1575  $\text{cm}^{-1}$ ;

13 HRMS (ESI-TOF)  $[\text{M} + \text{Na}]^+$  calcd for  $\text{C}_{18}\text{H}_{15}\text{F}_3\text{N}_2\text{NaO}_2^+$   $m/z$  371.0978, found 371.0978.

14

15 2-phenylpropan-2-yl 2-diazo-2-(3-methoxyphenyl)acetate (**d4**)

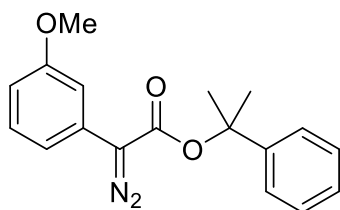

1

2 Prepared according to the General Procedure B using **e4** (233.2 mg, 0.82 mmol) and

3 isolated as yellow oil (182.9 mg, 72% yield); TLC Rf = 0.48 (n-hexane/EtOAc, 6/1); <sup>1</sup>H

4 NMR (400 MHz, CDCl<sub>3</sub>) δ 7.39-7.42 (m, 2H), 7.33-7.37 (m, 2H), 7.23-7.28 (m, 2H), 7.11

5 (t, *J* = 4.6 Hz, 1H), 6.96 (dd, *J* = 8.2 Hz, 0.9 Hz, 1H), 6.69 (dd, *J* = 8.0 Hz, 1.8 Hz, 1H),

6 3.77 (s, 3H), 1.87 (s, 6H); <sup>13</sup>C NMR (100 MHz, CDCl<sub>3</sub>) δ 163.8, 160.1, 145.7, 129.9,

7 128.5 (3C), 127.3 (2C), 124.3 (2C), 116.1, 114.5, 109.7, 83.2, 55.4, 29.1 (2C); IR (ATR)

8 ν 3793, 3061, 2980, 2937, 2836, 2356, 2339, 2316, 2077, 1699 cm<sup>-1</sup>; HRMS (ESI-TOF)

9 [M + H]<sup>+</sup> calcd for C<sub>18</sub>H<sub>19</sub>N<sub>2</sub>O<sub>3</sub><sup>+</sup> m/z 311.1390, found 311.1405.

10

11 2-phenylpropan-2-yl 2-diazo-2-(naphthalen-2-yl)acetate (**d5**)

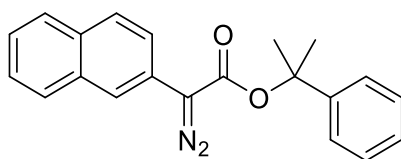

12

13 Prepared according to the General Procedure B using **e5** (456.6 mg, 1.5 mmol) and

14 isolated as yellow solid (525.9 mg, 90% yield); m.p. 55-57 °C; TLC Rf = 0.48 (n-

15 hexane/EtOAc, 6/1); <sup>1</sup>H NMR (400 MHz, CDCl<sub>3</sub>) δ 8.09 (d, *J* = 1.8 Hz, 2H), 7.73-7.82

16 (m, 3H), 7.35-7.49 (m, 7H), 7.25-7.30 (m, 1H), 1.90 (s, 6H); <sup>13</sup>C NMR (100 MHz, CDCl<sub>3</sub>)

1  $\delta$  164.2, 145.7, 133.7, 131.4, 128.6 (4C), 127.7 (2C), 127.3, 126.6, 125.7, 124.3 (2C) ,  
2 123.0, 122.6, 121.9, 83.3, 29.1 (2C); IR (ATR)  $\nu$  3741, 3567, 3094, 3058, 3027, 2981,  
3 2938, 2336, 2077, 1770  $\text{cm}^{-1}$ ; HRMS (ESI-TOF)  $[\text{M} + \text{Na}]^+$  calcd for  $\text{C}_{21}\text{H}_{18}\text{N}_2\text{NaO}_2^+$   
4  $m/z$  353.1260, found 353.1254.  
5



## B. Intensity Measurements

|    |                                       |                                          |
|----|---------------------------------------|------------------------------------------|
| 1  |                                       |                                          |
| 2  |                                       |                                          |
| 3  |                                       |                                          |
| 4  |                                       |                                          |
| 5  | Diffractionmeter                      | R-AXIS RAPID                             |
| 6  |                                       |                                          |
| 7  | Radiation                             | CuKa ( $\lambda = 1.54187 \text{ \AA}$ ) |
| 8  |                                       | multi-layer mirror                       |
| 9  | monochromated                         |                                          |
| 10 |                                       |                                          |
| 11 | Voltage, Current                      | 40kV, 30mA                               |
| 12 |                                       |                                          |
| 13 | Temperature                           | -180.0°C                                 |
| 14 |                                       |                                          |
| 15 | Detector Aperture                     | 460.0 x 256.0 mm                         |
| 16 |                                       |                                          |
| 17 | Data Images                           | 45 exposures                             |
| 18 |                                       |                                          |
| 19 | w oscillation Range (c=54.0, f=0.0)   | 80.0 - 260.0°                            |
| 20 |                                       |                                          |
| 21 | Exposure Rate                         | 2.0 sec./°                               |
| 22 |                                       |                                          |
| 23 | w oscillation Range (c=54.0, f=90.0)  | 80.0 - 260.0°                            |
| 24 |                                       |                                          |
| 25 | Exposure Rate                         | 2.0 sec./°                               |
| 26 |                                       |                                          |
| 27 | w oscillation Range (c=54.0, f=180.0) | 80.0 - 260.0°                            |
| 28 |                                       |                                          |
| 29 | Exposure Rate                         | 2.0 sec./°                               |
| 30 |                                       |                                          |
| 31 | w oscillation Range (c=54.0, f=270.0) | 80.0 - 260.0°                            |
| 32 |                                       |                                          |
| 33 | Exposure Rate                         | 2.0 sec./°                               |
| 34 |                                       |                                          |
| 35 | w oscillation Range (c=0.0, f=0.0)    | 80.0 - 260.0°                            |
| 36 |                                       |                                          |

|    |                             |                                          |
|----|-----------------------------|------------------------------------------|
| 1  | Exposure Rate               | 2.0 sec./ <sup>o</sup>                   |
| 2  |                             |                                          |
| 3  | Detector Position           | 127.40 mm                                |
| 4  |                             |                                          |
| 5  | Pixel Size                  | 0.100 mm                                 |
| 6  |                             |                                          |
| 7  | 2 $\theta$ max              | 136.5 <sup>o</sup>                       |
| 8  |                             |                                          |
| 9  | No. of Reflections Measured | Total: 9173                              |
| 10 |                             | Unique: 2892 (R <sub>int</sub> = 0.0745) |
| 11 |                             | Friedel pairs: 1305                      |
| 12 |                             |                                          |
| 13 | Corrections                 | Lorentz-polarization                     |
| 14 |                             | Absorption                               |
| 15 |                             | (trans. factors: 0.380 - 0.501)          |
| 16 |                             |                                          |
| 17 |                             |                                          |
| 18 |                             |                                          |
| 19 |                             |                                          |

## C. Structure Solution and Refinement

|    |                                        |                                             |
|----|----------------------------------------|---------------------------------------------|
| 1  |                                        |                                             |
| 2  |                                        |                                             |
| 3  |                                        |                                             |
| 4  |                                        |                                             |
| 5  | Structure Solution                     | Direct Methods                              |
| 6  |                                        |                                             |
| 7  | Refinement                             | Full-matrix least-squares on $F^2$          |
| 8  |                                        |                                             |
| 9  | Function Minimized                     | $\sum w (F_o^2 - F_c^2)^2$                  |
| 10 |                                        |                                             |
| 11 | Least Squares Weights                  | $w = 1 / [ s^2(F_o^2) + (0.0155 \cdot P)^2$ |
| 12 |                                        | $+ 0.0000 \cdot P ]$                        |
| 13 |                                        | where $P = (\text{Max}(F_o^2, 0) +$         |
| 14 | $2F_c^2)/3$                            |                                             |
| 15 |                                        |                                             |
| 16 | $2\theta_{\text{max}}$ cutoff          | $136.5^\circ$                               |
| 17 |                                        |                                             |
| 18 | Anomalous Dispersion                   | All non-hydrogen atoms                      |
| 19 |                                        |                                             |
| 20 | No. Observations (All reflections)     | 2892                                        |
| 21 |                                        |                                             |
| 22 | No. Variables                          | 199                                         |
| 23 |                                        |                                             |
| 24 | Reflection/Parameter Ratio             | 14.53                                       |
| 25 |                                        |                                             |
| 26 | Residuals: $R_1$ ( $I > 2.00s(I)$ )    | 0.0307                                      |
| 27 |                                        |                                             |
| 28 | Residuals: $R$ (All reflections)       | 0.0316                                      |
| 29 |                                        |                                             |
| 30 | Residuals: $wR_2$ (All reflections)    | 0.0749                                      |
| 31 |                                        |                                             |
| 32 | Goodness of Fit Indicator              | 1.065                                       |
| 33 |                                        |                                             |
| 34 | Flack Parameter (Friedel pairs = 1305) | 0.001(18)                                   |
| 35 |                                        |                                             |

|   |                                 |                                      |
|---|---------------------------------|--------------------------------------|
| 1 | Max Shift/Error in Final Cycle  | 0.000                                |
| 2 |                                 |                                      |
| 3 | Maximum peak in Final Diff. Map | 0.58 e <sup>-</sup> /Å <sup>3</sup>  |
| 4 |                                 |                                      |
| 5 | Minimum peak in Final Diff. Map | -0.33 e <sup>-</sup> /Å <sup>3</sup> |

The ellipsoid contour probability level in the ORTEP is 50%.

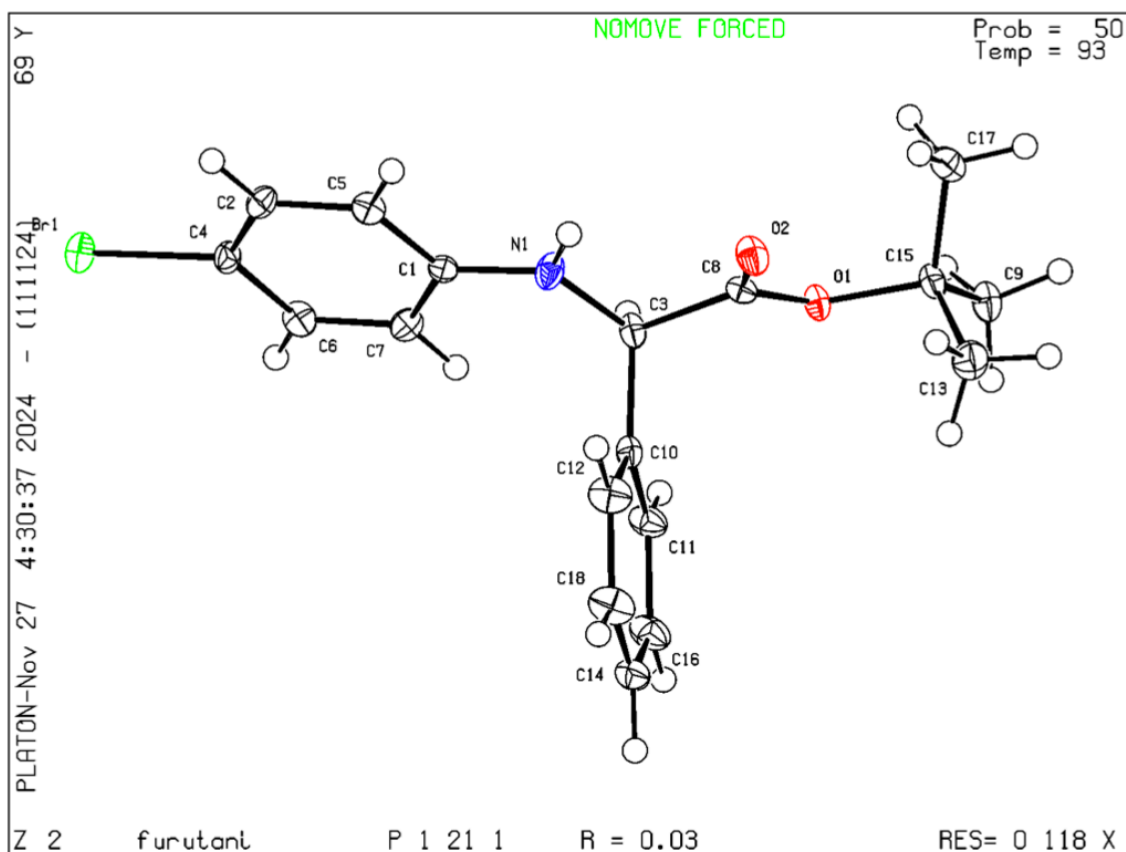

ORTEP of **3x**

## 1    **8.        Computational Details**

2    Computational optimizations of the molecular structures were carried out using the hybrid  
3    density functional method based on Becke's three-parameter exchange functional and the  
4    Lee-Yang-Parr nonlocal correlation functional ((R/U)B3LYP),<sup>4</sup> with the def2-SVPP basis  
5    set for H, C, N, O, Cl, and Ru.<sup>5</sup> Vibrational frequencies were computed at the same level  
6    to verify whether each optimized structure corresponds to an energy minimum on the  
7    potential energy surfaces (no imaginary frequency) or a transition state (one imaginary  
8    frequency) and to evaluate its zero-point vibrational energy (ZPVE) and thermal  
9    corrections. The intrinsic reaction coordinate (IRC) method was used to track minimum-  
10   energy paths from transition structures to the corresponding local minima.<sup>6</sup> Single-point  
11   energies were calculated at the (R/U)M08-HX level<sup>7</sup> using the SDD basis set for Ru, and  
12   the 6-311++G\*\* basis set for H, C, N, O, and Cl in dichloromethane or toluene solvent.  
13   Non-covalent interactions were visualized using Visual Molecular Dynamics (VMD)  
14   software (ver. 1.9.4a57). The source files were created from the corresponding XYZ files  
15   using NCIPLLOT (ver. 4.0).<sup>8</sup> Cylinder representations of transition structures were  
16   generated using CYLview Visualization software. Topographic steric maps were  
17   calculated by the SambVca 2.1 web tool.<sup>9</sup> Visualization of molecular orbitals was  
18   performed with Avogadro software.<sup>10</sup>

## 1 Supplementary Table 6.

|                                                      | E((R/U)b3lyp/def2-SVPP)<br>(A.U.) | E((R/U)M08-HX/SDD/6-<br>311++G**) (A.U.) |
|------------------------------------------------------|-----------------------------------|------------------------------------------|
| CP1                                                  | -2498.984114                      | -2500.30722                              |
| TS1                                                  | -2498.98365                       | -2500.30658                              |
| CP2 <sub>Assoc</sub>                                 | -2499.014359                      | -2500.34976                              |
| INT1 <sub>Diss</sub>                                 | -1094.618876                      | -1095.48252                              |
| [Ru( <i>p</i> -cymene)Cl <sub>2</sub> ] <sub>2</sub> | -1404.339237                      | -1404.803828                             |
| CP3                                                  | -3134.099884                      | -3135.95547                              |
| TS2                                                  | -3134.079488                      | -3135.95267                              |
| CP4                                                  | -3134.110854                      | -3135.98109                              |
| CP5                                                  | -3134.105342                      | -3135.96982                              |
| TS3                                                  | -3134.091706                      | -3135.94383                              |
| CP6                                                  | -2499.029364                      | -2500.35724                              |
| 6                                                    | -635.078184                       | -635.601471                              |
| TS3 <sub>major</sub>                                 | -3364.97084                       | -3366.9997                               |
| TS3 <sub>minor</sub>                                 | -3364.97009                       | -3366.9959                               |
| TS_Ru-N <sub>ylide</sub>                             | -2613.410768                      | -2614.83543                              |
| Ru-N <sub>ylide</sub>                                | -2613.44216                       | -2614.87919                              |
| TS_Ru-O <sub>ylide</sub>                             | -2613.404357                      | -2614.82552                              |
| Ru-O <sub>ylide</sub>                                | -2613.421173                      | -2614.84696                              |
| S <sub>0</sub> -2a                                   | -917.363393                       | -917.34009                               |
| *S <sub>n</sub> -2a                                  | -917.270839                       | -917.244803                              |
| S <sub>I</sub> -2a                                   | -917.301681                       | -917.294528                              |
| T <sub>n</sub> -2a                                   | -917.313158                       | -917.282113                              |
| T <sub>I</sub> -2a                                   | -917.316704                       | -917.286037                              |
| <sup>3</sup> TS4                                     | -917.300404                       | -917.267942                              |

|                           |              |              |
|---------------------------|--------------|--------------|
| <sup>3</sup> carbene      | -807.799899  | -807.781315  |
| <sup>1</sup> TS4          | -917.30666   | -917.282846  |
| <sup>1</sup> carbene      | -807.792836  | -807.781449  |
| MECP                      | -807.788979  | -807.775631  |
| TS5                       | -1095.404254 | -1095.398537 |
| IN1                       | -1095.46456  | -1095.475713 |
| TS6                       | -1095.462335 | -1095.471084 |
| IN2                       | -1095.480069 | -1095.492823 |
| TS7 <sub>major_298K</sub> | -1962.105501 | -1962.14932  |
| TS7 <sub>minor_298K</sub> | -1962.104265 | -1962.14314  |
| TS11 <sub>298K</sub>      | -2245.921218 | -2245.96175  |
| TS10 <sub>298K</sub>      | -1958.30968  | -1958.34208  |
| TS9 <sub>298K</sub>       | -1670.688771 | -1670.71643  |
| TS8 <sub>298K</sub>       | -1383.066556 | -1383.0892   |
| TS7 <sub>major_195K</sub> | -1962.105501 | -1962.14932  |
| TS7 <sub>minor_195K</sub> | -1962.104265 | -1962.14314  |
| TS11 <sub>195K</sub>      | -2245.921218 | -2245.96175  |
| TS10 <sub>195K</sub>      | -1958.30968  | -1958.34208  |
| TS9 <sub>195K</sub>       | -1670.688771 | -1670.71643  |
| TS8 <sub>195K</sub>       | -1383.066556 | -1383.0892   |
| aniline <sub>4</sub>      | -1150.44373  | -1150.46647  |
| 7                         | -866.630444  | -866.655726  |

|    |                                              |             |             |                             |
|----|----------------------------------------------|-------------|-------------|-----------------------------|
| 1  | <b>CP1</b>                                   |             |             |                             |
| 2  | Zero-point correction=                       |             |             | 0.621002 (Hartree/Particle) |
| 3  | Thermal correction to Energy=                |             |             | 0.661918                    |
| 4  | Thermal correction to Enthalpy=              |             |             | 0.662862                    |
| 5  | Thermal correction to Gibbs Free Energy=     |             |             | 0.543704                    |
| 6  | Sum of electronic and zero-point Energies=   |             |             | -2498.363112                |
| 7  | Sum of electronic and thermal Energies=      |             |             | -2498.322196                |
| 8  | Sum of electronic and thermal Enthalpies=    |             |             | -2498.321252                |
| 9  | Sum of electronic and thermal Free Energies= |             |             | -2498.440410                |
| 10 | Cartesian Coordinates                        |             |             |                             |
| 11 | Atom                                         | X           | Y           | Z                           |
| 12 | -----                                        |             |             |                             |
| 13 | C                                            | 4.07167300  | -1.20917300 | -1.50536600                 |
| 14 | C                                            | 4.07098600  | 0.05651400  | -0.82989500                 |
| 15 | C                                            | 3.73830200  | 0.17731400  | 0.53454800                  |
| 16 | C                                            | 3.18239400  | -0.99986900 | 1.14924600                  |
| 17 | C                                            | 3.07996700  | -2.22759000 | 0.45980600                  |
| 18 | C                                            | 3.60428500  | -2.36602700 | -0.87730700                 |
| 19 | H                                            | 4.36780000  | -1.24404200 | -2.55625600                 |
| 20 | H                                            | 4.38949200  | 0.93522500  | -1.39159100                 |
| 21 | H                                            | 2.79703700  | -0.94780000 | 2.16982800                  |
| 22 | H                                            | 2.62811900  | -3.08630400 | 0.95936300                  |
| 23 | Ru                                           | 1.84390600  | -0.67273400 | -0.64061800                 |
| 24 | Cl                                           | 0.29212900  | -2.33624100 | -1.43194400                 |
| 25 | Cl                                           | 1.25690100  | 0.66503600  | -2.55373900                 |
| 26 | C                                            | 0.50638200  | -0.01596100 | 0.58482200                  |
| 27 | C                                            | 0.31686100  | 1.34196200  | 1.07637900                  |
| 28 | C                                            | -0.27524000 | 1.58511900  | 2.34726400                  |
| 29 | C                                            | 0.69095000  | 2.46321900  | 0.29320500                  |
| 30 | C                                            | -0.45696400 | 2.88194800  | 2.81564500                  |
| 31 | H                                            | -0.56840500 | 0.74551100  | 2.98184800                  |
| 32 | C                                            | 0.47813000  | 3.75932400  | 0.75748200                  |
| 33 | H                                            | 1.10327900  | 2.28984600  | -0.70292500                 |
| 34 | C                                            | -0.08463900 | 3.97478100  | 2.02003200                  |
| 35 | H                                            | -0.90100700 | 3.04676300  | 3.80196000                  |
| 36 | H                                            | 0.74144600  | 4.61006500  | 0.12290400                  |

|    |   |             |             |             |
|----|---|-------------|-------------|-------------|
| 1  | H | -0.24650700 | 4.99485900  | 2.38184500  |
| 2  | C | -0.25635600 | -1.07464500 | 1.35146700  |
| 3  | O | 0.28825600  | -1.70841700 | 2.23363400  |
| 4  | O | -1.53375100 | -1.15900700 | 0.99718300  |
| 5  | C | -2.47517500 | -2.15891900 | 1.57432400  |
| 6  | C | 3.96826100  | 1.43324900  | 1.36158600  |
| 7  | H | 3.03233500  | 1.63165100  | 1.91342100  |
| 8  | C | 5.07389500  | 1.16722700  | 2.40606900  |
| 9  | H | 6.04113200  | 0.95657700  | 1.91411500  |
| 10 | H | 5.20704800  | 2.05136900  | 3.05466700  |
| 11 | H | 4.83013400  | 0.30820600  | 3.05567900  |
| 12 | C | 4.29873300  | 2.67838400  | 0.53055500  |
| 13 | H | 3.53372900  | 2.87420700  | -0.23855200 |
| 14 | H | 4.34858900  | 3.56430800  | 1.18688800  |
| 15 | H | 5.27945300  | 2.58414500  | 0.02925900  |
| 16 | C | 3.52553100  | -3.68995900 | -1.57908400 |
| 17 | H | 4.01634500  | -4.47819500 | -0.98000600 |
| 18 | H | 2.46310300  | -3.96794100 | -1.71105900 |
| 19 | H | 4.00135600  | -3.64944300 | -2.57208900 |
| 20 | C | -3.33910700 | 4.79462800  | -1.05090900 |
| 21 | C | -2.35942500 | 4.49174400  | -2.00519400 |
| 22 | C | -1.88405000 | 3.18980900  | -2.15939500 |
| 23 | C | -2.38831600 | 2.13603500  | -1.35851600 |
| 24 | C | -3.37937900 | 2.45123300  | -0.39797500 |
| 25 | C | -3.84135400 | 3.75835700  | -0.25247500 |
| 26 | H | -3.70984200 | 5.81758600  | -0.93603800 |
| 27 | H | -1.95506100 | 5.28515500  | -2.64371000 |
| 28 | H | -1.11443500 | 2.96541600  | -2.90402700 |
| 29 | H | -3.78715300 | 1.64970800  | 0.22653800  |
| 30 | H | -4.61155400 | 3.97109800  | 0.49727200  |
| 31 | N | -1.95036300 | 0.84643600  | -1.53051700 |
| 32 | H | -1.09066300 | 0.68096100  | -2.05499900 |
| 33 | H | -2.15617000 | 0.16009700  | -0.81157700 |
| 34 | C | -1.89076100 | -3.57777800 | 1.47253700  |
| 35 | H | -1.53243500 | -3.77751400 | 0.45055300  |
| 36 | H | -1.05111700 | -3.71532500 | 2.16967400  |

|    |   |             |             |             |
|----|---|-------------|-------------|-------------|
| 1  | H | -2.68606300 | -4.30365300 | 1.71520500  |
| 2  | C | -2.73006300 | -1.76635400 | 3.03221600  |
| 3  | H | -3.15640500 | -0.75177200 | 3.10382800  |
| 4  | H | -3.43096000 | -2.47482100 | 3.50415400  |
| 5  | H | -1.78553300 | -1.80109100 | 3.59607000  |
| 6  | C | -3.71189100 | -2.04472900 | 0.67632700  |
| 7  | C | -3.56055000 | -2.15055000 | -0.71859100 |
| 8  | C | -5.00523100 | -1.88356800 | 1.19620900  |
| 9  | C | -4.66985900 | -2.09067600 | -1.56453000 |
| 10 | H | -2.56198100 | -2.26445500 | -1.14987000 |
| 11 | C | -6.11823600 | -1.83223900 | 0.34823400  |
| 12 | H | -5.16553100 | -1.79664900 | 2.27278400  |
| 13 | C | -5.95509000 | -1.93391200 | -1.03476500 |
| 14 | H | -4.52477100 | -2.16027400 | -2.64682600 |
| 15 | H | -7.11741100 | -1.70556200 | 0.77705200  |
| 16 | H | -6.82423300 | -1.88620000 | -1.69824300 |

17

18

### TS1

|    |                                              |  |                             |
|----|----------------------------------------------|--|-----------------------------|
| 19 | Zero-point correction=                       |  | 0.621104 (Hartree/Particle) |
| 20 | Thermal correction to Energy=                |  | 0.660905                    |
| 21 | Thermal correction to Enthalpy=              |  | 0.661849                    |
| 22 | Thermal correction to Gibbs Free Energy=     |  | 0.547310                    |
| 23 | Sum of electronic and zero-point Energies=   |  | -2498.362546                |
| 24 | Sum of electronic and thermal Energies=      |  | -2498.322745                |
| 25 | Sum of electronic and thermal Enthalpies=    |  | -2498.321801                |
| 26 | Sum of electronic and thermal Free Energies= |  | -2498.436340                |

27

### Cartesian Coordinates

| 28 | Atom  | X          | Y           | Z           |
|----|-------|------------|-------------|-------------|
| 29 | ----- |            |             |             |
| 30 | C     | 3.90984100 | -1.62046800 | -1.40258800 |
| 31 | C     | 4.04632700 | -0.32460900 | -0.80343000 |
| 32 | C     | 3.70733400 | -0.07861300 | 0.54518500  |
| 33 | C     | 2.99940300 | -1.13751500 | 1.21300400  |
| 34 | C     | 2.76468000 | -2.38780000 | 0.59582200  |
| 35 | C     | 3.29196000 | -2.67073500 | -0.71623100 |
| 36 | H     | 4.21767700 | -1.75660400 | -2.44166000 |

|    |    |             |             |             |
|----|----|-------------|-------------|-------------|
| 1  | H  | 4.47365900  | 0.47477300  | -1.40951300 |
| 2  | H  | 2.60028400  | -0.97496800 | 2.21611800  |
| 3  | H  | 2.20358000  | -3.15372600 | 1.13403100  |
| 4  | Ru | 1.77810400  | -0.77042800 | -0.63249900 |
| 5  | Cl | 0.05876000  | -2.27057700 | -1.44114800 |
| 6  | Cl | 1.42572300  | 0.57857900  | -2.61401200 |
| 7  | C  | 0.43680600  | 0.10497400  | 0.50208900  |
| 8  | C  | 0.42224000  | 1.48692500  | 0.96683500  |
| 9  | C  | -0.19978000 | 1.84920500  | 2.19273900  |
| 10 | C  | 1.01674100  | 2.52068900  | 0.19969400  |
| 11 | C  | -0.19491900 | 3.16767300  | 2.63937000  |
| 12 | H  | -0.66753700 | 1.08368800  | 2.81567200  |
| 13 | C  | 1.00038600  | 3.84090900  | 0.64330300  |
| 14 | H  | 1.45524800  | 2.26264100  | -0.76647000 |
| 15 | C  | 0.40552000  | 4.17011800  | 1.86674200  |
| 16 | H  | -0.66810000 | 3.41896300  | 3.59346000  |
| 17 | H  | 1.44811200  | 4.62409000  | 0.02428600  |
| 18 | H  | 0.39842200  | 5.20805400  | 2.21387200  |
| 19 | C  | -0.39588500 | -0.85034100 | 1.33640500  |
| 20 | O  | 0.11488100  | -1.42117500 | 2.28077800  |
| 21 | O  | -1.67278700 | -0.94591500 | 0.97982300  |
| 22 | C  | -2.63026500 | -1.88038200 | 1.62797800  |
| 23 | C  | 4.08391600  | 1.18668900  | 1.30175800  |
| 24 | H  | 3.17178800  | 1.54299500  | 1.81190500  |
| 25 | C  | 5.12114300  | 0.84457200  | 2.39312800  |
| 26 | H  | 6.06103500  | 0.47375500  | 1.94454300  |
| 27 | H  | 5.35966400  | 1.74368400  | 2.98898300  |
| 28 | H  | 4.74892600  | 0.07086400  | 3.08738000  |
| 29 | C  | 4.59886100  | 2.32071800  | 0.40763700  |
| 30 | H  | 3.88762700  | 2.56598400  | -0.39795300 |
| 31 | H  | 4.75122800  | 3.23305700  | 1.00994000  |
| 32 | H  | 5.57001800  | 2.06439000  | -0.05416700 |
| 33 | C  | 3.06978100  | -4.01806700 | -1.33886500 |
| 34 | H  | 3.46486300  | -4.81738300 | -0.68590000 |
| 35 | H  | 1.98454500  | -4.18321700 | -1.47165900 |
| 36 | H  | 3.55569500  | -4.09192800 | -2.32506700 |

|    |   |             |             |             |
|----|---|-------------|-------------|-------------|
| 1  | C | -3.17982700 | 4.70930700  | -1.18667900 |
| 2  | C | -2.08083700 | 4.43114100  | -2.00913500 |
| 3  | C | -1.53692700 | 3.14906400  | -2.07013000 |
| 4  | C | -2.09444000 | 2.09506400  | -1.30553700 |
| 5  | C | -3.20620800 | 2.38384900  | -0.47708400 |
| 6  | C | -3.73477200 | 3.67186800  | -0.42502300 |
| 7  | H | -3.60251900 | 5.71752200  | -1.14432600 |
| 8  | H | -1.63784800 | 5.22773700  | -2.61668800 |
| 9  | H | -0.67887400 | 2.93687500  | -2.71396400 |
| 10 | H | -3.65187800 | 1.57847000  | 0.11479200  |
| 11 | H | -4.59877400 | 3.86897100  | 0.21880700  |
| 12 | N | -1.55545700 | 0.83758000  | -1.34949900 |
| 13 | H | -0.80807900 | 0.61586600  | -2.00810800 |
| 14 | H | -2.02046300 | 0.06455400  | -0.88816400 |
| 15 | C | -2.07470700 | -3.31469200 | 1.62502500  |
| 16 | H | -1.71185800 | -3.58671300 | 0.62119700  |
| 17 | H | -1.24352900 | -3.42106600 | 2.33759100  |
| 18 | H | -2.88481100 | -4.00898000 | 1.90788000  |
| 19 | C | -2.88139600 | -1.38400700 | 3.05456000  |
| 20 | H | -3.28219100 | -0.35650900 | 3.05509300  |
| 21 | H | -3.60182500 | -2.04149300 | 3.56917200  |
| 22 | H | -1.94005100 | -1.40217500 | 3.62378900  |
| 23 | C | -3.86453800 | -1.80268800 | 0.72039100  |
| 24 | C | -3.71688400 | -2.02719400 | -0.66154400 |
| 25 | C | -5.15181300 | -1.55485100 | 1.21994900  |
| 26 | C | -4.82311000 | -1.99832800 | -1.51347300 |
| 27 | H | -2.72326700 | -2.21817100 | -1.07779200 |
| 28 | C | -6.26199300 | -1.53291900 | 0.36648500  |
| 29 | H | -5.30991100 | -1.37553800 | 2.28526200  |
| 30 | C | -6.10249000 | -1.75247900 | -1.00292000 |
| 31 | H | -4.68156800 | -2.16738500 | -2.58544800 |
| 32 | H | -7.25625300 | -1.33715500 | 0.78047100  |
| 33 | H | -6.96928000 | -1.72988900 | -1.67076000 |

34

35

**CP2<sub>Assoc</sub>**

36 Zero-point correction=

0.625491 (Hartree/Particle)

|   |                                              |              |
|---|----------------------------------------------|--------------|
| 1 | Thermal correction to Energy=                | 0.664336     |
| 2 | Thermal correction to Enthalpy=              | 0.665280     |
| 3 | Thermal correction to Gibbs Free Energy=     | 0.553726     |
| 4 | Sum of electronic and zero-point Energies=   | -2498.388868 |
| 5 | Sum of electronic and thermal Energies=      | -2498.350023 |
| 6 | Sum of electronic and thermal Enthalpies=    | -2498.349079 |
| 7 | Sum of electronic and thermal Free Energies= | -2498.460633 |

| 8 Cartesian Coordinates |       |             |             |             |
|-------------------------|-------|-------------|-------------|-------------|
| 9 Atom                  | X     | Y           | Z           |             |
| 10                      | ----- |             |             |             |
| 11                      | C     | 3.05618200  | -2.71452000 | -1.00005600 |
| 12                      | C     | 3.74398000  | -1.47987200 | -0.88346200 |
| 13                      | C     | 3.64941500  | -0.65306700 | 0.28062100  |
| 14                      | C     | 2.74004500  | -1.08932000 | 1.28955000  |
| 15                      | C     | 2.03263300  | -2.32369300 | 1.19380300  |
| 16                      | C     | 2.17955900  | -3.14752700 | 0.04142200  |
| 17                      | H     | 3.12739700  | -3.28934300 | -1.92552600 |
| 18                      | H     | 4.32150600  | -1.12993400 | -1.74025800 |
| 19                      | H     | 2.55108200  | -0.44727100 | 2.15242500  |
| 20                      | H     | 1.32176800  | -2.59273300 | 1.97612200  |
| 21                      | Ru    | 1.58709900  | -1.04932700 | -0.57600000 |
| 22                      | Cl    | -0.45542500 | -2.04056400 | -1.53232700 |
| 23                      | Cl    | 1.69683200  | 0.32715400  | -2.63598400 |
| 24                      | C     | 0.17879200  | 0.55818700  | 0.26983200  |
| 25                      | C     | 0.95181900  | 1.76080900  | 0.77220500  |
| 26                      | C     | 1.20310100  | 1.98939900  | 2.14290700  |
| 27                      | C     | 1.44574500  | 2.72169400  | -0.13717500 |
| 28                      | C     | 1.90623800  | 3.11890900  | 2.57546900  |
| 29                      | H     | 0.84015000  | 1.27536800  | 2.88151400  |
| 30                      | C     | 2.14275400  | 3.85037600  | 0.29855800  |
| 31                      | H     | 1.31593700  | 2.58055100  | -1.21079000 |
| 32                      | C     | 2.37988600  | 4.06164200  | 1.66010300  |
| 33                      | H     | 2.07662500  | 3.26050400  | 3.64791000  |
| 34                      | H     | 2.50656100  | 4.56948200  | -0.44237400 |
| 35                      | H     | 2.92521600  | 4.94704600  | 2.00114600  |
| 36                      | C     | -0.64688500 | -0.16814900 | 1.30275200  |

|    |   |             |             |             |
|----|---|-------------|-------------|-------------|
| 1  | O | -0.21263900 | -0.54829900 | 2.37419600  |
| 2  | O | -1.92251500 | -0.34158300 | 0.90944800  |
| 3  | C | -2.92178300 | -1.10574900 | 1.68393300  |
| 4  | C | 4.46680100  | 0.61518500  | 0.47785400  |
| 5  | H | 3.79889200  | 1.34844100  | 0.96121300  |
| 6  | C | 5.63089500  | 0.33313100  | 1.45085300  |
| 7  | H | 6.33134200  | -0.41098900 | 1.02808900  |
| 8  | H | 6.19942300  | 1.25977000  | 1.64877500  |
| 9  | H | 5.26946600  | -0.05546100 | 2.41965500  |
| 10 | C | 4.97941700  | 1.24148400  | -0.82555100 |
| 11 | H | 4.16131000  | 1.38872200  | -1.55001600 |
| 12 | H | 5.43557700  | 2.22414800  | -0.61218200 |
| 13 | H | 5.75881000  | 0.61718300  | -1.30125800 |
| 14 | C | 1.41943100  | -4.43850200 | -0.08713500 |
| 15 | H | 2.06058500  | -5.27590200 | 0.24984800  |
| 16 | H | 0.50837500  | -4.42930300 | 0.53124600  |
| 17 | H | 1.12207800  | -4.62411900 | -1.13089600 |
| 18 | C | -3.39002700 | 4.17751000  | -1.24683100 |
| 19 | C | -2.89880100 | 3.53277400  | -2.38616200 |
| 20 | C | -2.00019900 | 2.47087800  | -2.25597800 |
| 21 | C | -1.60215600 | 2.05155100  | -0.98257600 |
| 22 | C | -2.08265300 | 2.69018800  | 0.16016900  |
| 23 | C | -2.97771900 | 3.75558900  | 0.02064100  |
| 24 | H | -4.09129800 | 5.01131800  | -1.34667300 |
| 25 | H | -3.21094400 | 3.85714400  | -3.38325100 |
| 26 | H | -1.60623700 | 1.96621400  | -3.14384300 |
| 27 | H | -1.76144500 | 2.37378200  | 1.15175700  |
| 28 | H | -3.35330200 | 4.25951600  | 0.91613100  |
| 29 | N | -0.67188200 | 0.91054100  | -0.93286000 |
| 30 | H | 0.01400000  | 0.98026600  | -1.73132700 |
| 31 | H | -1.16418400 | 0.01721000  | -1.15896800 |
| 32 | C | -2.43234200 | -2.54960100 | 1.89025400  |
| 33 | H | -2.11080700 | -2.98458700 | 0.92996700  |
| 34 | H | -1.58804500 | -2.58088300 | 2.59575100  |
| 35 | H | -3.25990200 | -3.15870000 | 2.29312300  |
| 36 | C | -3.15434800 | -0.40218400 | 3.02559800  |

|    |   |             |             |             |
|----|---|-------------|-------------|-------------|
| 1  | H | -3.52029700 | 0.62772600  | 2.87645100  |
| 2  | H | -3.90044500 | -0.95342000 | 3.62177100  |
| 3  | H | -2.21590000 | -0.36954800 | 3.59645200  |
| 4  | C | -4.16186400 | -1.10355100 | 0.77726000  |
| 5  | C | -4.03660500 | -1.50606100 | -0.56504000 |
| 6  | C | -5.43642600 | -0.75299100 | 1.24718900  |
| 7  | C | -5.14969200 | -1.55164800 | -1.40715400 |
| 8  | H | -3.05489000 | -1.78540700 | -0.95710800 |
| 9  | C | -6.55406800 | -0.80348700 | 0.40492600  |
| 10 | H | -5.57966100 | -0.43387100 | 2.28125000  |
| 11 | C | -6.41607900 | -1.20110600 | -0.92602900 |
| 12 | H | -5.02443000 | -1.86562300 | -2.44837300 |
| 13 | H | -7.53742200 | -0.52506000 | 0.79738900  |
| 14 | H | -7.28902700 | -1.23828500 | -1.58546600 |

15

16

**INT1<sub>Dis</sub>**

|    |                                              |  |                             |  |
|----|----------------------------------------------|--|-----------------------------|--|
| 17 | Zero-point correction=                       |  | 0.406189 (Hartree/Particle) |  |
| 18 | Thermal correction to Energy=                |  | 0.429031                    |  |
| 19 | Thermal correction to Enthalpy=              |  | 0.429975                    |  |
| 20 | Thermal correction to Gibbs Free Energy=     |  | 0.351071                    |  |
| 21 | Sum of electronic and zero-point Energies=   |  | -1094.212687                |  |
| 22 | Sum of electronic and thermal Energies=      |  | -1094.189845                |  |
| 23 | Sum of electronic and thermal Enthalpies=    |  | -1094.188901                |  |
| 24 | Sum of electronic and thermal Free Energies= |  | -1094.267805                |  |

25

Cartesian Coordinates

| 26 | Atom  | X          | Y           | Z           |
|----|-------|------------|-------------|-------------|
| 27 | ----- |            |             |             |
| 28 | C     | 1.30609900 | -0.67327900 | -0.18134500 |
| 29 | C     | 2.72544200 | -0.93301100 | -0.31473200 |
| 30 | C     | 3.30809700 | -2.14029000 | 0.15895500  |
| 31 | C     | 3.59917700 | -0.00576500 | -0.93939900 |
| 32 | C     | 4.66784000 | -2.39227300 | 0.00099500  |
| 33 | H     | 2.66290400 | -2.87174100 | 0.64605900  |
| 34 | C     | 4.96351800 | -0.27192200 | -1.09346900 |
| 35 | H     | 3.22726900 | 0.95634300  | -1.30656300 |
| 36 | C     | 5.51411900 | -1.46606300 | -0.62651200 |

|    |   |             |             |             |
|----|---|-------------|-------------|-------------|
| 1  | H | 5.07807600  | -3.33582400 | 0.37740500  |
| 2  | H | 5.59962300  | 0.47410500  | -1.58225000 |
| 3  | H | 6.58224500  | -1.67285700 | -0.74334700 |
| 4  | C | 0.29642700  | -1.56130600 | 0.27909800  |
| 5  | O | 0.42337300  | -2.64712400 | 0.82381300  |
| 6  | O | -0.98353300 | -1.01248200 | 0.00730900  |
| 7  | C | -2.21966300 | -1.55240500 | 0.55264600  |
| 8  | C | 1.39188200  | 4.32543800  | 1.17025500  |
| 9  | C | 1.14008000  | 4.27981200  | -0.20499100 |
| 10 | C | 0.95723700  | 3.04827000  | -0.84102000 |
| 11 | C | 1.03107200  | 1.87623900  | -0.08827500 |
| 12 | C | 1.28413300  | 1.90209700  | 1.27968700  |
| 13 | C | 1.46355700  | 3.13874000  | 1.90755900  |
| 14 | H | 1.53766100  | 5.28897700  | 1.66741000  |
| 15 | H | 1.08744800  | 5.20383800  | -0.78818500 |
| 16 | H | 0.76043000  | 3.00708300  | -1.91815100 |
| 17 | H | 1.35260700  | 0.95997700  | 1.82864600  |
| 18 | H | 1.66814600  | 3.17191200  | 2.98171800  |
| 19 | N | 0.77963000  | 0.57428100  | -0.77067000 |
| 20 | H | 1.06728000  | 0.67815000  | -1.75923400 |
| 21 | H | -0.25086800 | 0.39218000  | -0.75788900 |
| 22 | C | -2.45165900 | -2.99026500 | 0.04873800  |
| 23 | H | -2.42141100 | -3.02317500 | -1.05372400 |
| 24 | H | -1.67603300 | -3.66332400 | 0.44152600  |
| 25 | H | -3.44806200 | -3.33972200 | 0.37187800  |
| 26 | C | -2.15010000 | -1.51637900 | 2.08463600  |
| 27 | H | -2.02262600 | -0.48272900 | 2.44981200  |
| 28 | H | -3.06628600 | -1.93671300 | 2.53237000  |
| 29 | H | -1.29537800 | -2.12196800 | 2.42051800  |
| 30 | C | -3.30372800 | -0.63039100 | -0.02870500 |
| 31 | C | -3.28600900 | -0.32692600 | -1.40300300 |
| 32 | C | -4.34509000 | -0.10037600 | 0.74679200  |
| 33 | C | -4.26935900 | 0.47965400  | -1.97968300 |
| 34 | H | -2.48746700 | -0.73344000 | -2.03000200 |
| 35 | C | -5.33562500 | 0.70565600  | 0.17152600  |
| 36 | H | -4.39732000 | -0.31022700 | 1.81696400  |

|    |                                              |                                                        |              |                    |
|----|----------------------------------------------|--------------------------------------------------------|--------------|--------------------|
| 1  | C                                            | -5.30231200                                            | 1.00129000   | -1.19253000        |
| 2  | H                                            | -4.23232000                                            | 0.69864900   | -3.05189800        |
| 3  | H                                            | -6.13689900                                            | 1.10608700   | 0.80084200         |
| 4  | H                                            | -6.07594700                                            | 1.63202400   | -1.64152100        |
| 5  |                                              |                                                        |              |                    |
| 6  |                                              | <b>[Ru(<i>p</i>-cymene)Cl<sub>2</sub>]<sub>2</sub></b> |              |                    |
| 7  | Zero-point correction=                       |                                                        | 0.216339     | (Hartree/Particle) |
| 8  | Thermal correction to Energy=                |                                                        | 0.231500     |                    |
| 9  | Thermal correction to Enthalpy=              |                                                        | 0.232444     |                    |
| 10 | Thermal correction to Gibbs Free Energy=     |                                                        | 0.172509     |                    |
| 11 | Sum of electronic and zero-point Energies=   |                                                        | -1404.122899 |                    |
| 12 | Sum of electronic and thermal Energies=      |                                                        | -1404.107737 |                    |
| 13 | Sum of electronic and thermal Enthalpies=    |                                                        | -1404.106793 |                    |
| 14 | Sum of electronic and thermal Free Energies= |                                                        | -1404.166729 |                    |
| 15 |                                              | Cartesian Coordinates                                  |              |                    |
| 16 | Atom                                         | X                                                      | Y            | Z                  |
| 17 | -----                                        |                                                        |              |                    |
| 18 | C                                            | 0.22893500                                             | -1.26339900  | 1.55327300         |
| 19 | C                                            | -1.03417700                                            | -0.71188000  | 1.23545300         |
| 20 | C                                            | -1.45643800                                            | -0.61500200  | -0.12557200        |
| 21 | C                                            | -0.63511500                                            | -1.23797400  | -1.13280600        |
| 22 | C                                            | 0.58961300                                             | -1.86332400  | -0.80537100        |
| 23 | C                                            | 1.08282500                                             | -1.81549300  | 0.53411000         |
| 24 | H                                            | 0.60362800                                             | -1.18530500  | 2.57715700         |
| 25 | H                                            | -1.59849900                                            | -0.20423600  | 2.01860600         |
| 26 | H                                            | -0.92159200                                            | -1.14386800  | -2.18372300        |
| 27 | H                                            | 1.23775200                                             | -2.22754300  | -1.60547200        |
| 28 | Ru                                           | 0.55774000                                             | 0.23085900   | -0.02326600        |
| 29 | Cl                                           | 1.97803800                                             | 1.12325500   | -1.63576700        |
| 30 | Cl                                           | 0.60036600                                             | 2.25833600   | 1.12651900         |
| 31 | C                                            | -2.74368100                                            | 0.07993300   | -0.54210800        |
| 32 | H                                            | -2.55512300                                            | 0.49035000   | -1.55052300        |
| 33 | C                                            | -3.87346900                                            | -0.96432600  | -0.66390300        |
| 34 | H                                            | -4.09843800                                            | -1.42091700  | 0.31728600         |
| 35 | H                                            | -4.79693100                                            | -0.48502100  | -1.03437200        |
| 36 | H                                            | -3.60884800                                            | -1.77699400  | -1.36365100        |

|   |   |             |             |             |
|---|---|-------------|-------------|-------------|
| 1 | C | -3.14985400 | 1.24896200  | 0.36576000  |
| 2 | H | -2.31375800 | 1.95439100  | 0.51096900  |
| 3 | H | -3.99449200 | 1.79624000  | -0.08796900 |
| 4 | H | -3.48624900 | 0.89997900  | 1.35929500  |
| 5 | C | 2.45019300  | -2.33989000 | 0.88113000  |
| 6 | H | 2.38134500  | -3.40227200 | 1.18506700  |
| 7 | H | 3.13402600  | -2.27123100 | 0.01995100  |
| 8 | H | 2.89074000  | -1.77407800 | 1.71851300  |

9

10

### CP3

|    |                                              |  |                             |  |
|----|----------------------------------------------|--|-----------------------------|--|
| 11 | Zero-point correction=                       |  | 0.905126 (Hartree/Particle) |  |
| 12 | Thermal correction to Energy=                |  | 0.959008                    |  |
| 13 | Thermal correction to Enthalpy=              |  | 0.959952                    |  |
| 14 | Thermal correction to Gibbs Free Energy=     |  | 0.811020                    |  |
| 15 | Sum of electronic and zero-point Energies=   |  | -3133.194757                |  |
| 16 | Sum of electronic and thermal Energies=      |  | -3133.140876                |  |
| 17 | Sum of electronic and thermal Enthalpies=    |  | -3133.139932                |  |
| 18 | Sum of electronic and thermal Free Energies= |  | -3133.288864                |  |

19

### Cartesian Coordinates

| 20 | Atom  | X           | Y           | Z           |
|----|-------|-------------|-------------|-------------|
| 21 | ----- |             |             |             |
| 22 | C     | -2.83254400 | -0.05812300 | -3.66495900 |
| 23 | C     | -3.91581500 | -0.54139900 | -2.89994200 |
| 24 | C     | -4.28672800 | 0.03658200  | -1.64030800 |
| 25 | C     | -3.43870100 | 1.06224800  | -1.13962300 |
| 26 | C     | -2.34483300 | 1.57391100  | -1.90300100 |
| 27 | C     | -2.02402000 | 1.01471800  | -3.16749800 |
| 28 | H     | -2.55988100 | -0.55702600 | -4.59694900 |
| 29 | H     | -4.45447600 | -1.41773700 | -3.26327600 |
| 30 | H     | -3.62503300 | 1.47786400  | -0.14607900 |
| 31 | H     | -1.72565600 | 2.36453500  | -1.48214900 |
| 32 | Ru    | -2.09599100 | -0.62920900 | -1.60407500 |
| 33 | Cl    | 0.18154000  | -1.21480900 | -2.31167800 |
| 34 | Cl    | -2.50191400 | -3.07170400 | -1.42000900 |
| 35 | C     | -1.26499200 | -0.72711000 | 0.52024100  |
| 36 | C     | -2.28478500 | -0.75660500 | 1.65080000  |

|    |   |             |             |             |
|----|---|-------------|-------------|-------------|
| 1  | C | -2.07654000 | -0.05909900 | 2.85749400  |
| 2  | C | -3.42790800 | -1.57406400 | 1.57090500  |
| 3  | C | -2.98665200 | -0.13931500 | 3.91637100  |
| 4  | H | -1.18199100 | 0.55099200  | 2.98935800  |
| 5  | C | -4.33263400 | -1.66844300 | 2.63272100  |
| 6  | H | -3.59425600 | -2.15951600 | 0.66477900  |
| 7  | C | -4.12517800 | -0.94168100 | 3.80871500  |
| 8  | H | -2.79233000 | 0.42115600  | 4.83643800  |
| 9  | H | -5.20943400 | -2.31699200 | 2.53478800  |
| 10 | H | -4.83661600 | -1.00961700 | 4.63779200  |
| 11 | C | -0.22813900 | 0.36713900  | 0.61680900  |
| 12 | O | 0.96784900  | 0.15462000  | 0.55140900  |
| 13 | O | -0.76155900 | 1.59282400  | 0.75415500  |
| 14 | C | 0.04574400  | 2.81108600  | 0.94695000  |
| 15 | C | -5.55305700 | -0.35139700 | -0.89134400 |
| 16 | H | -5.30609000 | -0.32867300 | 0.18360400  |
| 17 | C | -6.63872000 | 0.71832600  | -1.13786600 |
| 18 | H | -6.91570400 | 0.76404400  | -2.20739300 |
| 19 | H | -7.55125000 | 0.47996000  | -0.56169000 |
| 20 | H | -6.29800900 | 1.72397800  | -0.83402600 |
| 21 | C | -6.08471700 | -1.75217200 | -1.22580100 |
| 22 | H | -5.29789300 | -2.52035400 | -1.14235400 |
| 23 | H | -6.90676400 | -2.01521300 | -0.53652500 |
| 24 | H | -6.49733200 | -1.79589000 | -2.25085900 |
| 25 | C | -0.86347300 | 1.52652900  | -3.97505700 |
| 26 | H | -1.23328300 | 2.22966200  | -4.74605800 |
| 27 | H | -0.13598600 | 2.05752500  | -3.34134000 |
| 28 | H | -0.33655600 | 0.69991500  | -4.47623600 |
| 29 | C | 0.66429300  | -4.01603100 | 4.12986600  |
| 30 | C | -0.46313500 | -4.42802600 | 3.41261100  |
| 31 | C | -0.82214800 | -3.76942500 | 2.23400400  |
| 32 | C | -0.05015200 | -2.69562000 | 1.77768000  |
| 33 | C | 1.08639100  | -2.28085400 | 2.47964500  |
| 34 | C | 1.43484300  | -2.94874100 | 3.65838300  |
| 35 | H | 0.94554400  | -4.53123900 | 5.05347000  |
| 36 | H | -1.06807100 | -5.26780300 | 3.76736200  |

|    |   |             |             |             |
|----|---|-------------|-------------|-------------|
| 1  | H | -1.69594100 | -4.09147400 | 1.66152400  |
| 2  | H | 1.70413100  | -1.45729500 | 2.12103700  |
| 3  | H | 2.32439800  | -2.62458000 | 4.20663900  |
| 4  | N | -0.45942500 | -2.04895100 | 0.52513000  |
| 5  | H | -1.05426000 | -2.71178500 | -0.02965200 |
| 6  | H | 0.34887200  | -1.84552200 | -0.09442300 |
| 7  | H | 3.04180100  | 0.05582400  | 1.11426400  |
| 8  | C | 7.47023400  | -0.73153200 | -0.85920000 |
| 9  | C | 6.50344800  | -0.12040100 | -0.05527000 |
| 10 | C | 6.64875400  | 1.22404000  | 0.33128800  |
| 11 | C | 7.76206900  | 1.96013800  | -0.08475300 |
| 12 | C | 8.72778200  | 1.34681300  | -0.89198700 |
| 13 | C | 8.58425600  | 0.00673000  | -1.27649900 |
| 14 | H | 7.36754000  | -1.78151400 | -1.15293400 |
| 15 | H | 7.88246000  | 3.00532900  | 0.21930500  |
| 16 | H | 9.60409200  | 1.91531600  | -1.22000000 |
| 17 | H | 9.35027900  | -0.46625000 | -1.89927300 |
| 18 | C | 5.48674400  | 1.66165500  | 1.19308400  |
| 19 | H | 5.78418600  | 2.30727400  | 2.03773900  |
| 20 | H | 4.73841500  | 2.22650400  | 0.60406500  |
| 21 | C | 5.22749100  | -0.71646900 | 0.52211700  |
| 22 | H | 5.42233500  | -1.70165100 | 0.97513400  |
| 23 | C | 4.87001200  | 0.31674900  | 1.65866500  |
| 24 | H | 5.39429500  | 0.00255700  | 2.57994700  |
| 25 | O | 3.50036900  | 0.35102300  | 1.93687100  |
| 26 | C | 3.94741600  | -0.07553100 | -1.58595300 |
| 27 | C | 3.74133500  | -2.25441300 | -0.80983300 |
| 28 | C | 4.37059000  | -0.97072000 | -2.78630500 |
| 29 | H | 4.54520300  | 0.84473400  | -1.50693700 |
| 30 | H | 2.88585700  | 0.20836900  | -1.69418600 |
| 31 | C | 4.33873000  | -2.41702200 | -2.22708000 |
| 32 | H | 4.10099400  | -3.00184300 | -0.08403900 |
| 33 | H | 2.64113200  | -2.34298200 | -0.86853300 |
| 34 | H | 3.67419300  | -0.84164000 | -3.63116800 |
| 35 | H | 5.38018300  | -0.70713000 | -3.14262800 |
| 36 | H | 3.73672800  | -3.10088900 | -2.84820600 |

|    |   |             |             |             |
|----|---|-------------|-------------|-------------|
| 1  | H | 5.35849000  | -2.83703100 | -2.16875700 |
| 2  | N | 4.07962300  | -0.89733400 | -0.37407600 |
| 3  | C | 0.98463100  | 3.02309500  | -0.24862600 |
| 4  | H | 1.62575100  | 3.90267800  | -0.07407800 |
| 5  | H | 1.63577200  | 2.14769900  | -0.37374700 |
| 6  | H | 0.42185400  | 3.18867600  | -1.18240300 |
| 7  | C | 0.85025900  | 2.70886800  | 2.25625800  |
| 8  | H | 1.63835500  | 1.94088000  | 2.19577500  |
| 9  | H | 1.32635800  | 3.68377600  | 2.45929600  |
| 10 | H | 0.18066100  | 2.48739000  | 3.10492400  |
| 11 | C | -1.00716000 | 3.92278100  | 1.08175600  |
| 12 | C | -2.20844900 | 3.67876200  | 1.77194000  |
| 13 | C | -0.78392800 | 5.21685300  | 0.58502900  |
| 14 | C | -3.15220500 | 4.69275100  | 1.95617700  |
| 15 | H | -2.40907900 | 2.68033500  | 2.16644000  |
| 16 | C | -1.72719100 | 6.23431600  | 0.77080500  |
| 17 | H | 0.13523500  | 5.45102300  | 0.04402500  |
| 18 | C | -2.91663100 | 5.97756500  | 1.45589000  |
| 19 | H | -4.07949500 | 4.47493400  | 2.49580500  |
| 20 | H | -1.52655800 | 7.23386500  | 0.37216100  |
| 21 | H | -3.65535500 | 6.77225800  | 1.59955800  |

22

23

### TS2

|    |                                              |                             |
|----|----------------------------------------------|-----------------------------|
| 24 | Zero-point correction=                       | 0.902839 (Hartree/Particle) |
| 25 | Thermal correction to Energy=                | 0.955389                    |
| 26 | Thermal correction to Enthalpy=              | 0.956333                    |
| 27 | Thermal correction to Gibbs Free Energy=     | 0.815210                    |
| 28 | Sum of electronic and zero-point Energies=   | -3133.176649                |
| 29 | Sum of electronic and thermal Energies=      | -3133.124099                |
| 30 | Sum of electronic and thermal Enthalpies=    | -3133.123155                |
| 31 | Sum of electronic and thermal Free Energies= | -3133.264278                |

32

### Cartesian Coordinates

| 33 | Atom  | X           | Y           | Z           |
|----|-------|-------------|-------------|-------------|
| 34 | ----- |             |             |             |
| 35 | C     | -3.10289300 | -0.94420300 | -3.04371900 |
| 36 | C     | -3.15598800 | -2.21282800 | -2.43953000 |

|    |    |             |             |             |
|----|----|-------------|-------------|-------------|
| 1  | C  | -3.47903000 | -2.37264400 | -1.04601100 |
| 2  | C  | -3.66364000 | -1.19063000 | -0.29004900 |
| 3  | C  | -3.61043200 | 0.10505700  | -0.89408800 |
| 4  | C  | -3.34357600 | 0.24851200  | -2.27590500 |
| 5  | H  | -2.80267500 | -0.85718800 | -4.09018500 |
| 6  | H  | -2.88977600 | -3.08706200 | -3.03435600 |
| 7  | H  | -3.84127500 | -1.26590300 | 0.78485700  |
| 8  | H  | -3.74282600 | 0.99288000  | -0.27632200 |
| 9  | Ru | -1.67728800 | -0.95768000 | -1.31537400 |
| 10 | Cl | -0.09008900 | 0.36986000  | -2.59969800 |
| 11 | Cl | -0.08598400 | -2.85768300 | -1.49710700 |
| 12 | C  | -0.48756400 | -0.26942200 | 0.59385500  |
| 13 | C  | -1.24555600 | -0.82571100 | 1.78898700  |
| 14 | C  | -1.78840000 | -0.02643100 | 2.81220100  |
| 15 | C  | -1.36625500 | -2.22418800 | 1.94360100  |
| 16 | C  | -2.44828700 | -0.58742500 | 3.91360100  |
| 17 | H  | -1.68537800 | 1.05737200  | 2.76790900  |
| 18 | C  | -2.00420900 | -2.78693100 | 3.04884300  |
| 19 | H  | -0.95558300 | -2.87920300 | 1.17185400  |
| 20 | C  | -2.56324300 | -1.97203500 | 4.04129100  |
| 21 | H  | -2.85832600 | 0.07243700  | 4.68544200  |
| 22 | H  | -2.06834000 | -3.87681700 | 3.13358400  |
| 23 | H  | -3.06926800 | -2.41290100 | 4.90574800  |
| 24 | C  | -0.34681100 | 1.22727400  | 0.54995500  |
| 25 | O  | 0.73093400  | 1.80426600  | 0.50612800  |
| 26 | O  | -1.50431700 | 1.90858300  | 0.55807800  |
| 27 | C  | -1.55677900 | 3.38398800  | 0.53192300  |
| 28 | C  | -3.70035500 | -3.73392500 | -0.39826600 |
| 29 | H  | -3.24282100 | -3.68490000 | 0.60425900  |
| 30 | C  | -5.21567800 | -3.95860500 | -0.20269000 |
| 31 | H  | -5.74082800 | -3.98873400 | -1.17543100 |
| 32 | H  | -5.39763300 | -4.92100700 | 0.30933600  |
| 33 | H  | -5.67450300 | -3.15863500 | 0.40464500  |
| 34 | C  | -3.07216600 | -4.91591200 | -1.14840700 |
| 35 | H  | -1.99700000 | -4.75339400 | -1.32691800 |
| 36 | H  | -3.19277100 | -5.83920000 | -0.55384500 |

|    |   |             |             |             |
|----|---|-------------|-------------|-------------|
| 1  | H | -3.56823000 | -5.09148600 | -2.12121400 |
| 2  | C | -3.29889300 | 1.59250500  | -2.94784200 |
| 3  | H | -4.11332800 | 1.66591800  | -3.69311600 |
| 4  | H | -3.42596700 | 2.40837500  | -2.21953900 |
| 5  | H | -2.33578400 | 1.72669400  | -3.46928500 |
| 6  | C | 2.82045600  | -2.51796300 | 3.96910200  |
| 7  | C | 2.66800900  | -3.27200300 | 2.80171400  |
| 8  | C | 2.01639300  | -2.72534100 | 1.69202000  |
| 9  | C | 1.52391300  | -1.41285800 | 1.73793900  |
| 10 | C | 1.67527800  | -0.65662900 | 2.90611000  |
| 11 | C | 2.31810500  | -1.21280000 | 4.01485300  |
| 12 | H | 3.32480100  | -2.94576100 | 4.84093700  |
| 13 | H | 3.04724000  | -4.29769500 | 2.75371900  |
| 14 | H | 1.87132300  | -3.32179100 | 0.78634100  |
| 15 | H | 1.31516000  | 0.37010100  | 2.94576500  |
| 16 | H | 2.43206600  | -0.61212000 | 4.92247700  |
| 17 | N | 0.92839600  | -0.85212400 | 0.53465400  |
| 18 | H | 0.85190600  | -1.62686800 | -0.14961900 |
| 19 | H | 1.90047100  | -0.13985800 | -0.00031900 |
| 20 | H | 2.35449400  | 1.82970200  | 1.18430400  |
| 21 | C | 6.36099500  | -0.83179200 | -0.85808100 |
| 22 | C | 5.63713400  | 0.17813000  | -0.21390500 |
| 23 | C | 6.24601400  | 1.41891600  | 0.05187900  |
| 24 | C | 7.55652400  | 1.66753300  | -0.36496700 |
| 25 | C | 8.26329600  | 0.66799500  | -1.04345600 |
| 26 | C | 7.67196400  | -0.57981000 | -1.27907100 |
| 27 | H | 5.92192500  | -1.81953300 | -1.02515000 |
| 28 | H | 8.03182300  | 2.63065700  | -0.15221100 |
| 29 | H | 9.29034600  | 0.85443500  | -1.37325300 |
| 30 | H | 8.24105200  | -1.36644200 | -1.78421600 |
| 31 | C | 5.32584400  | 2.30847300  | 0.84719200  |
| 32 | H | 5.83936700  | 2.83781300  | 1.66830100  |
| 33 | H | 4.84915800  | 3.08709500  | 0.22396700  |
| 34 | C | 4.22167400  | 0.12375500  | 0.35452800  |
| 35 | H | 4.05526800  | -0.82534600 | 0.88387300  |
| 36 | C | 4.27676400  | 1.30165300  | 1.39617900  |

|    |   |             |             |             |
|----|---|-------------|-------------|-------------|
| 1  | H | 4.74264100  | 0.84010100  | 2.28659300  |
| 2  | O | 3.08481700  | 1.87524600  | 1.83615900  |
| 3  | C | 2.97895900  | 1.45018300  | -1.43973400 |
| 4  | C | 3.14769800  | -0.88848600 | -1.68369300 |
| 5  | C | 3.84654800  | 1.24562400  | -2.68842900 |
| 6  | H | 3.25091700  | 2.32113800  | -0.83250900 |
| 7  | H | 1.92243800  | 1.54609900  | -1.72180300 |
| 8  | C | 3.76836100  | -0.27501900 | -2.96053000 |
| 9  | H | 3.69411300  | -1.75558200 | -1.28501700 |
| 10 | H | 2.11710200  | -1.20614400 | -1.89383400 |
| 11 | H | 3.45969900  | 1.84201300  | -3.53124000 |
| 12 | H | 4.88714500  | 1.55949300  | -2.50943600 |
| 13 | H | 3.11430100  | -0.49318000 | -3.81954700 |
| 14 | H | 4.76289200  | -0.69361000 | -3.18016800 |
| 15 | N | 3.07988400  | 0.18999600  | -0.63411300 |
| 16 | C | -0.88449100 | 3.91020800  | -0.74170600 |
| 17 | H | -0.94455800 | 5.01066900  | -0.77435200 |
| 18 | H | 0.17456600  | 3.62452800  | -0.75127200 |
| 19 | H | -1.36018600 | 3.49690200  | -1.64426900 |
| 20 | C | -0.88164200 | 3.96484200  | 1.78940400  |
| 21 | H | 0.19966100  | 3.76278400  | 1.79147600  |
| 22 | H | -1.04209000 | 5.05655900  | 1.81304100  |
| 23 | H | -1.32826600 | 3.54341200  | 2.70608000  |
| 24 | C | -3.06217600 | 3.69789500  | 0.58785500  |
| 25 | C | -3.88267400 | 3.03350900  | 1.51805400  |
| 26 | C | -3.65523900 | 4.67405300  | -0.22804400 |
| 27 | C | -5.24248300 | 3.33307100  | 1.62860000  |
| 28 | H | -3.45548200 | 2.25947900  | 2.15883700  |
| 29 | C | -5.01759200 | 4.97956100  | -0.11709300 |
| 30 | H | -3.06030900 | 5.21362500  | -0.96680700 |
| 31 | C | -5.81838200 | 4.31095400  | 0.81041700  |
| 32 | H | -5.85617100 | 2.79665800  | 2.35931200  |
| 33 | H | -5.45155700 | 5.74590200  | -0.76715700 |
| 34 | H | -6.88341000 | 4.54796500  | 0.89583100  |

35

36

**CP4**

|    |                                              |                       |                             |             |
|----|----------------------------------------------|-----------------------|-----------------------------|-------------|
| 1  | Zero-point correction=                       |                       | 0.906621 (Hartree/Particle) |             |
| 2  | Thermal correction to Energy=                |                       | 0.959982                    |             |
| 3  | Thermal correction to Enthalpy=              |                       | 0.960926                    |             |
| 4  | Thermal correction to Gibbs Free Energy=     |                       | 0.816294                    |             |
| 5  | Sum of electronic and zero-point Energies=   |                       | -3133.204233                |             |
| 6  | Sum of electronic and thermal Energies=      |                       | -3133.150873                |             |
| 7  | Sum of electronic and thermal Enthalpies=    |                       | -3133.149929                |             |
| 8  | Sum of electronic and thermal Free Energies= |                       | -3133.294561                |             |
| 9  |                                              | Cartesian Coordinates |                             |             |
| 10 | Atom                                         | X                     | Y                           |             |
| 11 |                                              | -----                 |                             |             |
| 12 | C                                            | -2.03567900           | -3.31907200                 | -2.02339500 |
| 13 | C                                            | -2.00643700           | -3.92090600                 | -0.75512000 |
| 14 | C                                            | -2.72196900           | -3.35493700                 | 0.35965100  |
| 15 | C                                            | -3.43477600           | -2.15389200                 | 0.12961000  |
| 16 | C                                            | -3.45681000           | -1.52375100                 | -1.15396800 |
| 17 | C                                            | -2.75857900           | -2.09364300                 | -2.24667400 |
| 18 | H                                            | -1.43110700           | -3.73578400                 | -2.83212900 |
| 19 | H                                            | -1.37223700           | -4.79416100                 | -0.60174900 |
| 20 | H                                            | -3.95147800           | -1.67354800                 | 0.96088500  |
| 21 | H                                            | -3.97989500           | -0.57457400                 | -1.27734600 |
| 22 | Ru                                           | -1.33575500           | -1.77799700                 | -0.52881600 |
| 23 | Cl                                           | 0.33343600            | -0.95793200                 | -2.17709200 |
| 24 | Cl                                           | 0.58927300            | -2.65246200                 | 0.79325000  |
| 25 | C                                            | -1.18527900           | 0.29322300                  | 0.61190900  |
| 26 | C                                            | -2.40848000           | 0.36217800                  | 1.52320400  |
| 27 | C                                            | -3.64488700           | 0.96849100                  | 1.21199200  |
| 28 | C                                            | -2.31506100           | -0.24639100                 | 2.79663100  |
| 29 | C                                            | -4.71878500           | 0.95668700                  | 2.11152100  |
| 30 | H                                            | -3.77882100           | 1.44820900                  | 0.24527800  |
| 31 | C                                            | -3.38432500           | -0.26126800                 | 3.69276000  |
| 32 | H                                            | -1.37750300           | -0.72515800                 | 3.08309700  |
| 33 | C                                            | -4.60306800           | 0.34139800                  | 3.35950200  |
| 34 | H                                            | -5.65776300           | 1.44317100                  | 1.82528800  |
| 35 | H                                            | -3.25879200           | -0.74498100                 | 4.66733300  |
| 36 | H                                            | -5.44161600           | 0.33717400                  | 4.06283400  |

|    |   |             |             |             |
|----|---|-------------|-------------|-------------|
| 1  | C | -1.05062700 | 1.33680800  | -0.47336100 |
| 2  | O | -0.01486400 | 1.92918000  | -0.72155600 |
| 3  | O | -2.17418000 | 1.61155400  | -1.17602200 |
| 4  | C | -2.17417900 | 2.67666700  | -2.18789900 |
| 5  | C | -2.78845800 | -4.01388600 | 1.73409600  |
| 6  | H | -2.58519400 | -3.21631600 | 2.47030100  |
| 7  | C | -4.22005300 | -4.53253000 | 1.98873900  |
| 8  | H | -4.49380900 | -5.31615200 | 1.25782600  |
| 9  | H | -4.29217200 | -4.97338700 | 2.99934200  |
| 10 | H | -4.97016400 | -3.72571300 | 1.91952300  |
| 11 | C | -1.76464700 | -5.13438500 | 1.95675100  |
| 12 | H | -0.73723700 | -4.78086300 | 1.77446600  |
| 13 | H | -1.82703700 | -5.49060000 | 3.00042600  |
| 14 | H | -1.96566900 | -6.00493600 | 1.30420100  |
| 15 | C | -2.77130000 | -1.47291900 | -3.61588400 |
| 16 | H | -3.38236900 | -2.09000000 | -4.30198400 |
| 17 | H | -3.20049600 | -0.45950400 | -3.59078900 |
| 18 | H | -1.74864400 | -1.40705400 | -4.02211000 |
| 19 | C | 1.45063300  | 3.06297600  | 4.23028900  |
| 20 | C | 2.00376500  | 1.78080700  | 4.12489400  |
| 21 | C | 1.51646100  | 0.86908900  | 3.18918400  |
| 22 | C | 0.45565800  | 1.20897900  | 2.31118800  |
| 23 | C | -0.10200000 | 2.50107200  | 2.43570400  |
| 24 | C | 0.39438000  | 3.40371800  | 3.37825900  |
| 25 | H | 1.83098000  | 3.77842200  | 4.96540900  |
| 26 | H | 2.82339600  | 1.47967000  | 4.78681400  |
| 27 | H | 1.94561000  | -0.13783900 | 3.13428800  |
| 28 | H | -0.92243600 | 2.80797800  | 1.78673200  |
| 29 | H | -0.05848700 | 4.39918800  | 3.44142900  |
| 30 | N | 0.04255600  | 0.27288900  | 1.37992600  |
| 31 | H | 0.48213500  | -0.64095300 | 1.45489300  |
| 32 | H | 2.35733500  | -0.73619100 | -1.54456100 |
| 33 | H | 1.63931700  | 1.69586000  | -0.87760700 |
| 34 | C | 5.60958600  | -1.58275500 | 1.18337000  |
| 35 | C | 4.99912200  | -0.47345400 | 0.58530200  |
| 36 | C | 5.67974000  | 0.75500100  | 0.49554500  |

|    |   |             |             |             |
|----|---|-------------|-------------|-------------|
| 1  | C | 6.98963200  | 0.86526100  | 0.97065300  |
| 2  | C | 7.61004000  | -0.25288900 | 1.54018100  |
| 3  | C | 6.92294000  | -1.46889500 | 1.65346300  |
| 4  | H | 5.06418400  | -2.52306600 | 1.30850200  |
| 5  | H | 7.52218200  | 1.81981300  | 0.91171000  |
| 6  | H | 8.63431700  | -0.17187300 | 1.91778800  |
| 7  | H | 7.40861200  | -2.32816700 | 2.12593300  |
| 8  | C | 4.80016300  | 1.82000700  | -0.11009600 |
| 9  | H | 4.86098800  | 2.78339300  | 0.42399600  |
| 10 | H | 5.06796300  | 2.02573900  | -1.16328300 |
| 11 | C | 3.59473000  | -0.33924100 | 0.04786300  |
| 12 | H | 2.83709000  | -0.82156900 | 0.68230100  |
| 13 | C | 3.37452300  | 1.21683800  | -0.04434100 |
| 14 | H | 2.90979300  | 1.51097400  | 0.91311500  |
| 15 | O | 2.59546400  | 1.61223900  | -1.12875800 |
| 16 | C | 4.19885200  | -0.52020000 | -2.46882300 |
| 17 | C | 3.44524600  | -2.47539100 | -1.35549700 |
| 18 | C | 3.85857500  | -1.52173600 | -3.58324400 |
| 19 | H | 5.25208700  | -0.58757400 | -2.15318500 |
| 20 | H | 3.93829400  | 0.52036700  | -2.69511200 |
| 21 | C | 3.37870600  | -2.80921900 | -2.85277500 |
| 22 | H | 4.41630400  | -2.75396200 | -0.92023100 |
| 23 | H | 2.62452200  | -2.88700200 | -0.74861100 |
| 24 | H | 3.05113900  | -1.12041200 | -4.21575500 |
| 25 | H | 4.73270200  | -1.69708800 | -4.23039000 |
| 26 | H | 2.34231800  | -3.04384800 | -3.13736000 |
| 27 | H | 4.00491500  | -3.68575400 | -3.08354200 |
| 28 | N | 3.35820100  | -0.97528700 | -1.31073400 |
| 29 | C | -3.63626600 | 2.70297500  | -2.66577600 |
| 30 | H | -3.76939900 | 3.49303500  | -3.42371400 |
| 31 | H | -3.91367300 | 1.73356700  | -3.11615000 |
| 32 | H | -4.32481900 | 2.91178200  | -1.83047000 |
| 33 | C | -1.26261200 | 2.29232500  | -3.36019700 |
| 34 | H | -1.48496800 | 1.25972000  | -3.67027200 |
| 35 | H | -1.44914000 | 2.95854900  | -4.22016000 |
| 36 | H | -0.20111100 | 2.33793400  | -3.08500400 |

|    |   |             |            |             |
|----|---|-------------|------------|-------------|
| 1  | C | -1.83632800 | 4.03068000 | -1.54499300 |
| 2  | C | -0.98546000 | 4.95771600 | -2.16400100 |
| 3  | C | -2.44791300 | 4.40127000 | -0.33469600 |
| 4  | C | -0.75399100 | 6.21502800 | -1.59507800 |
| 5  | H | -0.48146700 | 4.70433900 | -3.09847100 |
| 6  | C | -2.21388400 | 5.65304400 | 0.23949400  |
| 7  | H | -3.10870100 | 3.69780000 | 0.17891300  |
| 8  | C | -1.36585000 | 6.56950000 | -0.39080900 |
| 9  | H | -0.08169300 | 6.91793200 | -2.09758200 |
| 10 | H | -2.69743400 | 5.91173300 | 1.18691600  |
| 11 | H | -1.18065000 | 7.55100200 | 0.05683200  |

12

13

### CP5

|    |                                              |  |                             |              |
|----|----------------------------------------------|--|-----------------------------|--------------|
| 14 | Zero-point correction=                       |  | 0.905464 (Hartree/Particle) |              |
| 15 | Thermal correction to Energy=                |  |                             | 0.959275     |
| 16 | Thermal correction to Enthalpy=              |  |                             | 0.960219     |
| 17 | Thermal correction to Gibbs Free Energy=     |  |                             | 0.812392     |
| 18 | Sum of electronic and zero-point Energies=   |  |                             | -3133.199878 |
| 19 | Sum of electronic and thermal Energies=      |  |                             | -3133.146067 |
| 20 | Sum of electronic and thermal Enthalpies=    |  |                             | -3133.145123 |
| 21 | Sum of electronic and thermal Free Energies= |  |                             | -3133.292949 |

22

### Cartesian Coordinates

|    |       |             |             |             |
|----|-------|-------------|-------------|-------------|
| 23 | Atom  | X           | Y           | Z           |
| 24 | ----- |             |             |             |
| 25 | C     | 0.00940700  | -2.29196500 | 0.30781700  |
| 26 | C     | -0.84617600 | -3.48711800 | 0.11477200  |
| 27 | C     | -0.94705700 | -4.26152800 | -1.07047700 |
| 28 | C     | -1.66947700 | -3.90350900 | 1.19574400  |
| 29 | C     | -1.82216600 | -5.34616600 | -1.16606700 |
| 30 | H     | -0.32490900 | -4.01145700 | -1.92504500 |
| 31 | C     | -2.54125800 | -4.98813800 | 1.09476300  |
| 32 | H     | -1.61356000 | -3.35039500 | 2.13537100  |
| 33 | C     | -2.63352800 | -5.72400700 | -0.09157100 |
| 34 | H     | -1.86018700 | -5.91205600 | -2.10396100 |
| 35 | H     | -3.15164500 | -5.26440300 | 1.96196600  |
| 36 | H     | -3.31183700 | -6.57944400 | -0.17206700 |

|    |   |             |             |             |
|----|---|-------------|-------------|-------------|
| 1  | C | 0.80242900  | -1.63347600 | -0.65215000 |
| 2  | O | 1.42751400  | -0.53220800 | -0.51441500 |
| 3  | O | 0.92575000  | -2.27176000 | -1.85571300 |
| 4  | C | 1.35126600  | -1.63581500 | -3.08686000 |
| 5  | C | 0.37343200  | -0.52209200 | -3.47262800 |
| 6  | H | -0.65491400 | -0.91136500 | -3.38359300 |
| 7  | H | 0.53104000  | -0.21223500 | -4.52063400 |
| 8  | H | 0.46432200  | 0.35725900  | -2.81949600 |
| 9  | C | 1.25093200  | -2.77758200 | -4.11824000 |
| 10 | H | 1.61050300  | -2.43285700 | -5.10275800 |
| 11 | H | 0.20248800  | -3.10776300 | -4.21875100 |
| 12 | H | 1.86179600  | -3.64155500 | -3.80810900 |
| 13 | C | 2.81962900  | -1.19721300 | -3.00271700 |
| 14 | C | 3.28590300  | -0.02107700 | -3.60766600 |
| 15 | C | 3.75913200  | -2.04332500 | -2.38800500 |
| 16 | C | 4.65009800  | 0.29844900  | -3.60488000 |
| 17 | H | 2.58340500  | 0.66533500  | -4.08475600 |
| 18 | C | 5.11951400  | -1.72647800 | -2.37927500 |
| 19 | H | 3.41209600  | -2.95899900 | -1.90102300 |
| 20 | C | 5.57433600  | -0.55186200 | -2.99163200 |
| 21 | H | 4.98932500  | 1.22062500  | -4.08852800 |
| 22 | H | 5.83056900  | -2.40254800 | -1.89317900 |
| 23 | H | 6.64084800  | -0.30494200 | -2.99284900 |
| 24 | N | 0.13490400  | -1.81652800 | 1.64959400  |
| 25 | H | -0.23041100 | -0.89058200 | 1.86613000  |
| 26 | C | 1.00237800  | -2.34630600 | 2.58323200  |
| 27 | C | 1.14456400  | -1.71444000 | 3.84539700  |
| 28 | C | 1.75551200  | -3.51985700 | 2.34662900  |
| 29 | C | 2.00935700  | -2.22795100 | 4.81170500  |
| 30 | H | 0.55591700  | -0.81474600 | 4.05264600  |
| 31 | C | 2.61598100  | -4.02125800 | 3.32565600  |
| 32 | H | 1.65693500  | -4.03114200 | 1.38684500  |
| 33 | C | 2.76056000  | -3.38522600 | 4.56454700  |
| 34 | H | 2.09456500  | -1.71648300 | 5.77737400  |
| 35 | H | 3.18497600  | -4.93331300 | 3.11291200  |
| 36 | H | 3.43449300  | -3.78851400 | 5.32621400  |

|    |   |             |             |             |
|----|---|-------------|-------------|-------------|
| 1  | H | -2.02263400 | 1.52774400  | -0.44899800 |
| 2  | C | -6.09526100 | 1.51705400  | 1.08393900  |
| 3  | C | -5.21194100 | 0.68907200  | 0.37884900  |
| 4  | C | -5.70591900 | -0.36627000 | -0.41249100 |
| 5  | C | -7.08416800 | -0.56906300 | -0.52984800 |
| 6  | C | -7.96442000 | 0.28046300  | 0.14938900  |
| 7  | C | -7.47393100 | 1.31399700  | 0.95844000  |
| 8  | H | -5.72404700 | 2.30004200  | 1.75199900  |
| 9  | H | -7.47193600 | -1.39300700 | -1.13700300 |
| 10 | H | -9.04445500 | 0.12447100  | 0.06418400  |
| 11 | H | -8.17034100 | 1.95404700  | 1.50854100  |
| 12 | C | -4.58268400 | -1.17322600 | -1.01351300 |
| 13 | H | -4.73863800 | -2.26197400 | -0.93087400 |
| 14 | H | -4.44073300 | -0.95539500 | -2.08848900 |
| 15 | C | -3.70089600 | 0.68131100  | 0.38559800  |
| 16 | H | -3.26193100 | 0.80022400  | 1.38592600  |
| 17 | C | -3.32834100 | -0.71466000 | -0.22884900 |
| 18 | H | -3.17190000 | -1.40089300 | 0.62103500  |
| 19 | O | -2.18567000 | -0.64905300 | -1.02879100 |
| 20 | H | -1.44166600 | -1.15358500 | -0.61225500 |
| 21 | C | -3.46820600 | 1.97233400  | -1.86554600 |
| 22 | C | -3.09730000 | 3.15181500  | 0.23984300  |
| 23 | C | -3.68536100 | 3.48286700  | -2.05467800 |
| 24 | H | -4.38013200 | 1.38876600  | -2.04041100 |
| 25 | H | -2.65611600 | 1.56736500  | -2.48309700 |
| 26 | C | -2.89246900 | 4.13261700  | -0.90912500 |
| 27 | H | -4.09777700 | 3.26351000  | 0.68165300  |
| 28 | H | -2.33122600 | 3.17483400  | 1.02790300  |
| 29 | H | -4.75839100 | 3.72698900  | -1.96457800 |
| 30 | H | -1.82064000 | 4.19060800  | -1.15804600 |
| 31 | N | -3.03350800 | 1.79240900  | -0.41644100 |
| 32 | C | 3.74905100  | 1.33705400  | 0.00747000  |
| 33 | C | 3.23687000  | 2.64236800  | -0.15592700 |
| 34 | C | 2.55451400  | 3.33017900  | 0.91174700  |
| 35 | C | 2.38293900  | 2.61330300  | 2.12387100  |
| 36 | C | 2.90447500  | 1.28808900  | 2.30242100  |

|    |    |             |             |             |
|----|----|-------------|-------------|-------------|
| 1  | C  | 3.59740600  | 0.63622800  | 1.25517800  |
| 2  | H  | 4.17826400  | 0.81756600  | -0.85204800 |
| 3  | H  | 3.28581600  | 3.11007100  | -1.14242800 |
| 4  | H  | 1.77137100  | 3.03772300  | 2.92057500  |
| 5  | H  | 2.68755600  | 0.74149700  | 3.22257200  |
| 6  | Ru | 1.58803700  | 1.37166800  | 0.51017000  |
| 7  | Cl | 0.16250000  | 2.32479300  | -1.26599200 |
| 8  | Cl | -0.53642200 | 1.28430400  | 1.80401900  |
| 9  | C  | 2.03626800  | 4.73984600  | 0.68163400  |
| 10 | H  | 1.65550900  | 4.75677500  | -0.35445100 |
| 11 | C  | 0.87587700  | 5.13717600  | 1.60162200  |
| 12 | H  | 1.19961900  | 5.24548700  | 2.65313000  |
| 13 | H  | 0.46443800  | 6.11239200  | 1.28610100  |
| 14 | H  | 0.06773500  | 4.38760200  | 1.56187300  |
| 15 | C  | 3.20167300  | 5.74506900  | 0.78099400  |
| 16 | H  | 4.01853400  | 5.49567300  | 0.08032800  |
| 17 | H  | 2.85183300  | 6.76545300  | 0.54143800  |
| 18 | H  | 3.62618100  | 5.76228700  | 1.80173800  |
| 19 | C  | 4.10957600  | -0.76701400 | 1.39819300  |
| 20 | H  | 5.21017400  | -0.74397900 | 1.51565200  |
| 21 | H  | 3.67276700  | -1.27491900 | 2.27118100  |
| 22 | H  | 3.87711000  | -1.35480000 | 0.49638500  |
| 23 | H  | -3.25339400 | 5.14229600  | -0.65299000 |
| 24 | H  | -3.34935000 | 3.81564300  | -3.04976100 |

25

26

### TS3

|    |                                              |  |                             |
|----|----------------------------------------------|--|-----------------------------|
| 27 | Zero-point correction=                       |  | 0.900393 (Hartree/Particle) |
| 28 | Thermal correction to Energy=                |  | 0.953428                    |
| 29 | Thermal correction to Enthalpy=              |  | 0.954372                    |
| 30 | Thermal correction to Gibbs Free Energy=     |  | 0.809647                    |
| 31 | Sum of electronic and zero-point Energies=   |  | -3133.191313                |
| 32 | Sum of electronic and thermal Energies=      |  | -3133.138278                |
| 33 | Sum of electronic and thermal Enthalpies=    |  | -3133.137334                |
| 34 | Sum of electronic and thermal Free Energies= |  | -3133.282058                |

35

### Cartesian Coordinates

|    |      |   |   |   |
|----|------|---|---|---|
| 36 | Atom | X | Y | Z |
|----|------|---|---|---|

|    |   |             |             |             |
|----|---|-------------|-------------|-------------|
| 1  |   |             |             |             |
| 2  | C | 0.25678300  | 2.06529600  | 0.49284700  |
| 3  | C | 0.86964500  | 3.44342300  | 0.36197300  |
| 4  | C | 1.42291600  | 3.89992100  | -0.85377700 |
| 5  | C | 1.03832400  | 4.26884100  | 1.49090400  |
| 6  | C | 2.06668500  | 5.13607900  | -0.94335600 |
| 7  | H | 1.36723500  | 3.26594000  | -1.73830800 |
| 8  | C | 1.68432100  | 5.50654100  | 1.40290100  |
| 9  | H | 0.66703200  | 3.93160500  | 2.45938700  |
| 10 | C | 2.19661600  | 5.95568600  | 0.18340500  |
| 11 | H | 2.48114700  | 5.45716100  | -1.90538300 |
| 12 | H | 1.78707800  | 6.12231200  | 2.30290300  |
| 13 | H | 2.70080200  | 6.92495800  | 0.11261700  |
| 14 | C | -0.72472700 | 1.56917500  | -0.49086400 |
| 15 | O | -1.32617200 | 0.48491400  | -0.41655800 |
| 16 | O | -0.88133800 | 2.35449200  | -1.56585600 |
| 17 | C | -1.39928900 | 1.90429200  | -2.85780000 |
| 18 | C | -0.54314100 | 0.74485900  | -3.37680900 |
| 19 | H | 0.52204900  | 1.00571300  | -3.25652700 |
| 20 | H | -0.73357000 | 0.57992100  | -4.45131000 |
| 21 | H | -0.71684700 | -0.19178600 | -2.82842500 |
| 22 | C | -1.19747800 | 3.14190900  | -3.75051600 |
| 23 | H | -1.60266300 | 2.94977200  | -4.75831600 |
| 24 | H | -0.12341200 | 3.37956800  | -3.83594900 |
| 25 | H | -1.71442100 | 4.01859800  | -3.32672900 |
| 26 | C | -2.89960900 | 1.60646300  | -2.76882400 |
| 27 | C | -3.49550600 | 0.57420100  | -3.50885300 |
| 28 | C | -3.73366700 | 2.44788800  | -2.01251000 |
| 29 | C | -4.88398200 | 0.38929500  | -3.49702700 |
| 30 | H | -2.87729900 | -0.10019100 | -4.10523100 |
| 31 | C | -5.11837900 | 2.26302300  | -1.99456600 |
| 32 | H | -3.28846200 | 3.25451700  | -1.42341400 |
| 33 | C | -5.70238200 | 1.23225600  | -2.74018600 |
| 34 | H | -5.32583800 | -0.42022300 | -4.08730500 |
| 35 | H | -5.74593300 | 2.93053700  | -1.39540600 |
| 36 | H | -6.78770600 | 1.09048700  | -2.73321900 |

|    |   |             |             |             |
|----|---|-------------|-------------|-------------|
| 1  | N | -0.03213200 | 1.64077400  | 1.84018400  |
| 2  | H | 0.34158700  | 0.72583700  | 2.08963300  |
| 3  | C | -1.14098100 | 2.02659700  | 2.57005000  |
| 4  | C | -1.43791300 | 1.36195200  | 3.78742400  |
| 5  | C | -1.98379900 | 3.09532400  | 2.18493300  |
| 6  | C | -2.51474300 | 1.75879900  | 4.57865900  |
| 7  | H | -0.79759900 | 0.53212600  | 4.10185000  |
| 8  | C | -3.05814000 | 3.48292000  | 2.99024300  |
| 9  | H | -1.78117500 | 3.63477300  | 1.25713200  |
| 10 | C | -3.34043400 | 2.82443800  | 4.19182400  |
| 11 | H | -2.71022100 | 1.22863600  | 5.51766700  |
| 12 | H | -3.68499600 | 4.32177800  | 2.66795500  |
| 13 | H | -4.17994900 | 3.13846000  | 4.81904600  |
| 14 | H | 2.35418300  | -1.13979900 | -0.35908800 |
| 15 | C | 6.51924100  | -1.33579000 | 0.87400500  |
| 16 | C | 5.50800800  | -0.49514500 | 0.39412100  |
| 17 | C | 5.82646500  | 0.67398800  | -0.32552000 |
| 18 | C | 7.16588300  | 0.99272400  | -0.57276200 |
| 19 | C | 8.17575700  | 0.14313000  | -0.10581200 |
| 20 | C | 7.85687600  | -1.01518600 | 0.61574600  |
| 21 | H | 6.27668300  | -2.22676500 | 1.46249300  |
| 22 | H | 7.42448100  | 1.90356900  | -1.12222900 |
| 23 | H | 9.22504200  | 0.39120500  | -0.29579600 |
| 24 | H | 8.65583500  | -1.66265900 | 0.99014700  |
| 25 | C | 4.58304700  | 1.43077900  | -0.72448700 |
| 26 | H | 4.67208000  | 2.51986700  | -0.57197800 |
| 27 | H | 4.33823300  | 1.27728100  | -1.79254200 |
| 28 | C | 4.01841100  | -0.60456800 | 0.57694500  |
| 29 | H | 3.71489700  | -0.86003800 | 1.60296300  |
| 30 | C | 3.44208200  | 0.80301300  | 0.13878700  |
| 31 | H | 3.36095700  | 1.40259300  | 1.07353500  |
| 32 | O | 2.24031000  | 0.64498600  | -0.48964100 |
| 33 | H | 1.25078200  | 1.31836300  | 0.05290500  |
| 34 | C | 3.76690400  | -1.80406100 | -1.71612500 |
| 35 | C | 3.18552900  | -2.99911300 | 0.33466000  |
| 36 | C | 4.07223200  | -3.29786800 | -1.86624300 |

|    |    |             |             |             |
|----|----|-------------|-------------|-------------|
| 1  | H  | 4.63396100  | -1.15992700 | -1.90625300 |
| 2  | H  | 2.93055200  | -1.48052500 | -2.35169200 |
| 3  | C  | 3.13077100  | -3.96039200 | -0.84954100 |
| 4  | H  | 4.09142400  | -3.16817300 | 0.93870100  |
| 5  | H  | 2.29964000  | -3.00342500 | 0.98609300  |
| 6  | H  | 5.12657600  | -3.50143100 | -1.60597900 |
| 7  | H  | 2.10180400  | -4.00329200 | -1.24236300 |
| 8  | N  | 3.29804900  | -1.62693300 | -0.28132700 |
| 9  | C  | -3.69459400 | -1.53812900 | -0.30122300 |
| 10 | C  | -3.12993300 | -2.80072300 | -0.57393200 |
| 11 | C  | -2.49825400 | -3.58347700 | 0.45881200  |
| 12 | C  | -2.46217500 | -3.01781000 | 1.76270400  |
| 13 | C  | -3.05920100 | -1.74747900 | 2.05390600  |
| 14 | C  | -3.67486900 | -0.99045000 | 1.03038400  |
| 15 | H  | -4.07428400 | -0.92862700 | -1.12445400 |
| 16 | H  | -3.08026700 | -3.15005000 | -1.60804100 |
| 17 | H  | -1.90019700 | -3.51763400 | 2.55203400  |
| 18 | H  | -2.94896900 | -1.31482400 | 3.05016900  |
| 19 | Ru | -1.57617200 | -1.58790000 | 0.39206100  |
| 20 | Cl | -0.01824200 | -2.26330300 | -1.36617000 |
| 21 | Cl | 0.36611800  | -1.53519000 | 1.89688500  |
| 22 | C  | -1.89577100 | -4.93438900 | 0.11092800  |
| 23 | H  | -1.44688600 | -4.81550400 | -0.89020400 |
| 24 | C  | -0.77941500 | -5.38413000 | 1.06083500  |
| 25 | H  | -1.16535400 | -5.63033100 | 2.06721200  |
| 26 | H  | -0.29737300 | -6.29575300 | 0.66560700  |
| 27 | H  | -0.01085500 | -4.59999200 | 1.16372000  |
| 28 | C  | -3.01530700 | -5.99075900 | 0.01586600  |
| 29 | H  | -3.79530000 | -5.69799000 | -0.70972800 |
| 30 | H  | -2.60040100 | -6.96189300 | -0.30889500 |
| 31 | H  | -3.50501400 | -6.14158000 | 0.99565100  |
| 32 | C  | -4.26497500 | 0.36261700  | 1.29816000  |
| 33 | H  | -5.36747600 | 0.27291200  | 1.34988000  |
| 34 | H  | -3.90359000 | 0.78615800  | 2.24699900  |
| 35 | H  | -4.02434300 | 1.06331800  | 0.48410100  |
| 36 | H  | 3.44436500  | -4.97870900 | -0.56534100 |

|    |                                              |                       |              |                    |
|----|----------------------------------------------|-----------------------|--------------|--------------------|
| 1  | H                                            | 3.90886600            | -3.64266100  | -2.90042700        |
| 2  |                                              |                       |              |                    |
| 3  |                                              | <b>CP6</b>            |              |                    |
| 4  | Zero-point correction=                       |                       | 0.624594     | (Hartree/Particle) |
| 5  | Thermal correction to Energy=                |                       | 0.664079     |                    |
| 6  | Thermal correction to Enthalpy=              |                       | 0.665023     |                    |
| 7  | Thermal correction to Gibbs Free Energy=     |                       | 0.549544     |                    |
| 8  | Sum of electronic and zero-point Energies=   |                       | -2498.404770 |                    |
| 9  | Sum of electronic and thermal Energies=      |                       | -2498.365285 |                    |
| 10 | Sum of electronic and thermal Enthalpies=    |                       | -2498.364341 |                    |
| 11 | Sum of electronic and thermal Free Energies= |                       | -2498.479820 |                    |
| 12 |                                              | Cartesian Coordinates |              |                    |
| 13 | Atom                                         | X                     | Y            | Z                  |
| 14 | -----                                        |                       |              |                    |
| 15 | C                                            | 1.52596600            | -1.54765800  | 0.40315500         |
| 16 | C                                            | 2.48061300            | -2.52512900  | -0.27560400        |
| 17 | C                                            | 2.12023000            | -3.08332400  | -1.51424100        |
| 18 | C                                            | 3.65434000            | -2.96882500  | 0.34535800         |
| 19 | C                                            | 2.93516300            | -4.03304500  | -2.13342700        |
| 20 | H                                            | 1.17399900            | -2.79225000  | -1.98151600        |
| 21 | C                                            | 4.47310700            | -3.92069900  | -0.27481100        |
| 22 | H                                            | 3.92366100            | -2.57605400  | 1.32787700         |
| 23 | C                                            | 4.12174500            | -4.45054100  | -1.51853200        |
| 24 | H                                            | 2.63535600            | -4.46007700  | -3.09593500        |
| 25 | H                                            | 5.38902400            | -4.25226600  | 0.22489200         |
| 26 | H                                            | 4.76109400            | -5.19596000  | -2.00221500        |
| 27 | C                                            | 1.07418100            | -0.35233800  | -0.45910400        |
| 28 | O                                            | 0.03326500            | 0.26666600   | -0.25226300        |
| 29 | O                                            | 1.92373100            | 0.00119800   | -1.40498900        |
| 30 | C                                            | 1.60383000            | 0.96043900   | -2.48516100        |
| 31 | C                                            | 0.47420400            | 0.35747600   | -3.32712500        |
| 32 | H                                            | 0.74661600            | -0.67150300  | -3.61337200        |
| 33 | H                                            | 0.33760300            | 0.93609400   | -4.25542100        |
| 34 | H                                            | -0.47881500           | 0.31709100   | -2.77916100        |
| 35 | C                                            | 2.90966900            | 0.99339200   | -3.29280100        |
| 36 | H                                            | 2.80115700            | 1.67845700   | -4.15017400        |

|    |   |             |             |             |
|----|---|-------------|-------------|-------------|
| 1  | H | 3.15491700  | -0.01599300 | -3.66492300 |
| 2  | H | 3.74439600  | 1.35052300  | -2.66751700 |
| 3  | C | 1.31619200  | 2.35657500  | -1.92517800 |
| 4  | C | 0.38538900  | 3.21182400  | -2.53573800 |
| 5  | C | 2.06411400  | 2.85140400  | -0.84356800 |
| 6  | C | 0.20831400  | 4.52468300  | -2.08130300 |
| 7  | H | -0.21026200 | 2.86542300  | -3.38330000 |
| 8  | C | 1.88276700  | 4.15808800  | -0.38355500 |
| 9  | H | 2.79010700  | 2.20736700  | -0.34018500 |
| 10 | C | 0.95608200  | 5.00410700  | -1.00296500 |
| 11 | H | -0.51848400 | 5.17455200  | -2.57928900 |
| 12 | H | 2.47424300  | 4.51372200  | 0.46572000  |
| 13 | H | 0.81939300  | 6.03034100  | -0.64796300 |
| 14 | N | 1.89963700  | -1.08989900 | 1.72987700  |
| 15 | H | 1.10587900  | -1.15684000 | 2.36807900  |
| 16 | C | 2.82983900  | -0.10818200 | 2.05103900  |
| 17 | C | 2.73992600  | 0.52004800  | 3.31588100  |
| 18 | C | 3.89243200  | 0.26967400  | 1.20081700  |
| 19 | C | 3.67262500  | 1.47634300  | 3.71134300  |
| 20 | H | 1.92287500  | 0.23969800  | 3.98895000  |
| 21 | C | 4.82044500  | 1.23292600  | 1.61052600  |
| 22 | H | 3.99928000  | -0.19705500 | 0.22086200  |
| 23 | C | 4.72420200  | 1.84677200  | 2.86260100  |
| 24 | H | 3.57472000  | 1.94076000  | 4.69838200  |
| 25 | H | 5.63827700  | 1.50021500  | 0.93254900  |
| 26 | H | 5.45755900  | 2.59548600  | 3.17588800  |
| 27 | H | 0.58062800  | -2.09236100 | 0.56558300  |
| 28 | C | -2.63177900 | 1.76685500  | -0.35861400 |
| 29 | C | -3.52786600 | 0.78927100  | -0.84157700 |
| 30 | C | -4.19973500 | -0.11025000 | 0.06271300  |
| 31 | C | -3.95381500 | 0.05526300  | 1.45291200  |
| 32 | C | -3.07950700 | 1.08407700  | 1.94083100  |
| 33 | C | -2.39296100 | 1.94291600  | 1.05308800  |
| 34 | H | -2.03745700 | 2.34891900  | -1.06809400 |
| 35 | H | -3.62724400 | 0.63414900  | -1.91839100 |
| 36 | H | -4.36602200 | -0.65817700 | 2.16662000  |

|    |    |             |             |             |
|----|----|-------------|-------------|-------------|
| 1  | H  | -2.85070700 | 1.11855200  | 3.00807800  |
| 2  | Ru | -2.03532400 | -0.19879000 | 0.46372400  |
| 3  | Cl | -1.76251200 | -2.06816600 | -1.04923000 |
| 4  | Cl | -1.22936000 | -1.59571400 | 2.27689300  |
| 5  | C  | -5.10948900 | -1.19172300 | -0.49617500 |
| 6  | H  | -4.63336400 | -1.53233700 | -1.43127800 |
| 7  | C  | -5.25536400 | -2.41977900 | 0.41047000  |
| 8  | H  | -5.81338900 | -2.18919200 | 1.33671000  |
| 9  | H  | -5.81875900 | -3.20671000 | -0.12083600 |
| 10 | H  | -4.26810800 | -2.83044900 | 0.68011800  |
| 11 | C  | -6.48020700 | -0.57563900 | -0.84379900 |
| 12 | H  | -6.38482700 | 0.27492500  | -1.54261600 |
| 13 | H  | -7.12798800 | -1.33277900 | -1.32047400 |
| 14 | H  | -6.99585400 | -0.21151100 | 0.06395500  |
| 15 | C  | -1.40067900 | 2.96233100  | 1.54152600  |
| 16 | H  | -1.86100000 | 3.96875300  | 1.55134000  |
| 17 | H  | -1.06236900 | 2.72865800  | 2.56404800  |
| 18 | H  | -0.51730200 | 3.00295300  | 0.88384800  |

19  
20

6

|    |                                              |  |                             |  |
|----|----------------------------------------------|--|-----------------------------|--|
| 21 | Zero-point correction=                       |  | 0.278778 (Hartree/Particle) |  |
| 22 | Thermal correction to Energy=                |  | 0.291292                    |  |
| 23 | Thermal correction to Enthalpy=              |  | 0.292236                    |  |
| 24 | Thermal correction to Gibbs Free Energy=     |  | 0.239295                    |  |
| 25 | Sum of electronic and zero-point Energies=   |  | -634.799406                 |  |
| 26 | Sum of electronic and thermal Energies=      |  | -634.786892                 |  |
| 27 | Sum of electronic and thermal Enthalpies=    |  | -634.785948                 |  |
| 28 | Sum of electronic and thermal Free Energies= |  | -634.838890                 |  |

29

Cartesian Coordinates

| 30 | Atom  | X           | Y           | Z           |
|----|-------|-------------|-------------|-------------|
| 31 | ----- |             |             |             |
| 32 | H     | 1.77963300  | 2.25803100  | 0.16344400  |
| 33 | C     | -1.16217900 | -1.41979700 | -0.89966000 |
| 34 | C     | -0.81945100 | -0.11996600 | -0.51486700 |
| 35 | C     | -1.72248400 | 0.66365700  | 0.22681200  |
| 36 | C     | -2.96988000 | 0.14537800  | 0.58759100  |

|    |   |             |             |             |
|----|---|-------------|-------------|-------------|
| 1  | C | -3.30884600 | -1.15843300 | 0.20613400  |
| 2  | C | -2.41121100 | -1.93758800 | -0.53639700 |
| 3  | H | -0.46974600 | -2.02701900 | -1.49245700 |
| 4  | H | -3.67906400 | 0.75321300  | 1.15908400  |
| 5  | H | -4.28500800 | -1.56986600 | 0.48254500  |
| 6  | H | -2.69165500 | -2.95096500 | -0.84069500 |
| 7  | C | -1.13915900 | 2.02758700  | 0.51601200  |
| 8  | H | -1.87242000 | 2.84694700  | 0.42029900  |
| 9  | H | -0.72586100 | 2.08527900  | 1.54137100  |
| 10 | C | 0.45724200  | 0.65358600  | -0.80000800 |
| 11 | H | 0.75704900  | 0.55702600  | -1.85542000 |
| 12 | C | 0.02038800  | 2.14128400  | -0.50919500 |
| 13 | H | -0.39258900 | 2.56011700  | -1.44673600 |
| 14 | O | 1.10232000  | 2.92462600  | -0.10835300 |
| 15 | C | 1.50282900  | -0.29469900 | 1.31680500  |
| 16 | C | 2.73686700  | -0.41988200 | -0.64818400 |
| 17 | C | 1.81272900  | -1.80812300 | 1.13391500  |
| 18 | H | 0.49957800  | -0.11023900 | 1.72650000  |
| 19 | H | 2.23261300  | 0.15947700  | 2.01303900  |
| 20 | C | 2.54333400  | -1.89696100 | -0.23204700 |
| 21 | H | 2.73161200  | -0.25770800 | -1.73782700 |
| 22 | H | 3.70817800  | -0.04846700 | -0.26745400 |
| 23 | H | 2.43204000  | -2.18829200 | 1.96372400  |
| 24 | H | 0.88324300  | -2.39995000 | 1.12220300  |
| 25 | H | 3.50260800  | -2.43818300 | -0.17178900 |
| 26 | H | 1.91964600  | -2.42475200 | -0.97411300 |
| 27 | N | 1.65864500  | 0.33458300  | -0.00290800 |

28

29

**TS3<sub>major</sub>**

|    |                                            |                             |
|----|--------------------------------------------|-----------------------------|
| 30 | Zero-point correction=                     | 0.981536 (Hartree/Particle) |
| 31 | Thermal correction to Energy=              | 1.039188                    |
| 32 | Thermal correction to Enthalpy=            | 1.040132                    |
| 33 | Thermal correction to Gibbs Free Energy=   | 0.883902                    |
| 34 | Sum of electronic and zero-point Energies= | -3363.989305                |
| 35 | Sum of electronic and thermal Energies=    | -3363.931653                |
| 36 | Sum of electronic and thermal Enthalpies=  | -3363.930709                |

|    |                                              |                       |             |              |
|----|----------------------------------------------|-----------------------|-------------|--------------|
| 1  | Sum of electronic and thermal Free Energies= |                       |             | -3364.086939 |
| 2  |                                              | Cartesian Coordinates |             |              |
| 3  | Atom                                         | X                     | Y           | Z            |
| 4  | -----                                        |                       |             |              |
| 5  | C                                            | 1.16559400            | 2.28967800  | -0.02264400  |
| 6  | C                                            | 1.09990500            | 3.71653600  | 0.47891500   |
| 7  | C                                            | 0.48253500            | 4.04841000  | 1.70423800   |
| 8  | C                                            | 1.52874000            | 4.78621800  | -0.33120600  |
| 9  | C                                            | 0.34556200            | 5.37605600  | 2.11566000   |
| 10 | H                                            | 0.08387200            | 3.25427200  | 2.33503000   |
| 11 | C                                            | 1.39074300            | 6.11644200  | 0.07906600   |
| 12 | H                                            | 1.96867600            | 4.57431400  | -1.30646400  |
| 13 | C                                            | 0.80584000            | 6.42349000  | 1.30991500   |
| 14 | H                                            | -0.13697000           | 5.59377700  | 3.07488000   |
| 15 | H                                            | 1.74514200            | 6.91881300  | -0.57693500  |
| 16 | H                                            | 0.69874500            | 7.46403700  | 1.63312000   |
| 17 | C                                            | 1.61772200            | 1.19221700  | 0.85336700   |
| 18 | O                                            | 1.76954300            | 0.01031600  | 0.50125500   |
| 19 | O                                            | 1.78917900            | 1.53885000  | 2.13660400   |
| 20 | C                                            | 1.78850300            | 0.60170200  | 3.25974300   |
| 21 | C                                            | 0.47818400            | -0.19167700 | 3.26700700   |
| 22 | H                                            | -0.36266700           | 0.50536900  | 3.11147700   |
| 23 | H                                            | 0.33465900            | -0.68389400 | 4.24428800   |
| 24 | H                                            | 0.43266800            | -0.94584000 | 2.46896600   |
| 25 | C                                            | 1.83737300            | 1.53928000  | 4.47957300   |
| 26 | H                                            | 1.89763800            | 0.94693800  | 5.40812700   |
| 27 | H                                            | 0.93099100            | 2.16755300  | 4.51439700   |
| 28 | H                                            | 2.71737200            | 2.20143000  | 4.42889100   |
| 29 | C                                            | 3.05872500            | -0.25506900 | 3.25143500   |
| 30 | C                                            | 3.05476400            | -1.58980100 | 3.68376000   |
| 31 | C                                            | 4.29042700            | 0.32705100  | 2.90562200   |
| 32 | C                                            | 4.24604700            | -2.32154900 | 3.77079900   |
| 33 | H                                            | 2.11527100            | -2.07399200 | 3.95887000   |
| 34 | C                                            | 5.47978300            | -0.40150900 | 2.98683300   |
| 35 | H                                            | 4.31454900            | 1.36439900  | 2.56044700   |
| 36 | C                                            | 5.46425500            | -1.73155000 | 3.42281500   |

|    |   |             |             |             |
|----|---|-------------|-------------|-------------|
| 1  | H | 4.21776500  | -3.36017900 | 4.11640100  |
| 2  | H | 6.42590100  | 0.07410600  | 2.70930900  |
| 3  | H | 6.39595400  | -2.30157700 | 3.49398400  |
| 4  | N | 1.59466800  | 2.13282900  | -1.39011200 |
| 5  | H | 0.97733500  | 1.56587400  | -1.96981800 |
| 6  | C | 2.90903900  | 2.17073100  | -1.81668300 |
| 7  | C | 3.22297400  | 1.76687200  | -3.13966100 |
| 8  | C | 3.96906300  | 2.63997300  | -1.00616100 |
| 9  | C | 4.52818100  | 1.84236600  | -3.62329900 |
| 10 | H | 2.41620200  | 1.40063800  | -3.78191000 |
| 11 | C | 5.27196400  | 2.71208200  | -1.50635400 |
| 12 | H | 3.76284300  | 2.96674700  | 0.01540300  |
| 13 | C | 5.57139900  | 2.31543500  | -2.81408000 |
| 14 | H | 4.73386300  | 1.53005700  | -4.65343300 |
| 15 | H | 6.06811000  | 3.09054000  | -0.85565800 |
| 16 | H | 6.59320100  | 2.38080200  | -3.19935300 |
| 17 | H | -2.12702400 | 0.23181600  | -0.55994800 |
| 18 | C | -5.63889400 | 2.20966900  | -2.19167600 |
| 19 | C | -4.52913700 | 2.35731800  | -1.35137800 |
| 20 | C | -4.54051100 | 3.29938800  | -0.30334800 |
| 21 | C | -5.67626700 | 4.08834600  | -0.09310000 |
| 22 | C | -6.79131800 | 3.92933100  | -0.92447600 |
| 23 | C | -6.77491000 | 2.99660800  | -1.97032400 |
| 24 | H | -5.62027500 | 1.50254500  | -3.02756000 |
| 25 | H | -5.69240300 | 4.82990000  | 0.71200200  |
| 26 | H | -7.68081400 | 4.54703700  | -0.76372000 |
| 27 | H | -7.64669600 | 2.89345700  | -2.62382900 |
| 28 | C | -3.23548100 | 3.29462900  | 0.45494200  |
| 29 | H | -2.86634300 | 4.30787200  | 0.68800900  |
| 30 | H | -3.32803800 | 2.75869700  | 1.41846900  |
| 31 | C | -3.19489300 | 1.66508400  | -1.41400500 |
| 32 | H | -2.77954300 | 1.59427000  | -2.43035300 |
| 33 | C | -2.24867900 | 2.50049800  | -0.45942800 |
| 34 | H | -1.72913100 | 3.23709500  | -1.11264600 |
| 35 | O | -1.38030100 | 1.66680100  | 0.18624300  |
| 36 | H | -0.11322500 | 1.96112000  | 0.02361000  |

|    |    |             |             |             |
|----|----|-------------|-------------|-------------|
| 1  | C  | -3.96042200 | -0.10384100 | 0.32945100  |
| 2  | C  | -3.40604100 | -0.81771600 | -1.93743200 |
| 3  | C  | -4.81714000 | -1.32480000 | -0.06275000 |
| 4  | H  | -4.56798100 | 0.75852500  | 0.62970700  |
| 5  | H  | -3.24352100 | -0.33444100 | 1.12938000  |
| 6  | C  | -3.96183700 | -2.00162700 | -1.15591100 |
| 7  | H  | -4.15690700 | -0.41550500 | -2.63611300 |
| 8  | H  | -2.46475400 | -1.01036200 | -2.47254300 |
| 9  | H  | -5.73871400 | -0.94836300 | -0.54150500 |
| 10 | H  | -3.13288700 | -2.57101200 | -0.70636300 |
| 11 | N  | -3.13839400 | 0.24024900  | -0.89731200 |
| 12 | C  | 3.15877600  | -2.73943800 | 0.01019700  |
| 13 | C  | 2.11199200  | -3.65641300 | -0.21543500 |
| 14 | C  | 1.50619600  | -3.80574500 | -1.51506300 |
| 15 | C  | 2.00527300  | -2.97627100 | -2.55599300 |
| 16 | C  | 3.08536900  | -2.05877600 | -2.34058900 |
| 17 | C  | 3.67081100  | -1.92362500 | -1.05993000 |
| 18 | H  | 3.52736400  | -2.58113100 | 1.02634400  |
| 19 | H  | 1.68348500  | -4.19546800 | 0.63292400  |
| 20 | H  | 1.50832900  | -2.97095800 | -3.52634200 |
| 21 | H  | 3.39212300  | -1.38749600 | -3.14507600 |
| 22 | Ru | 1.41662100  | -1.69242100 | -0.90791500 |
| 23 | Cl | -0.67039500 | -2.04379800 | 0.32934400  |
| 24 | Cl | 0.06667000  | -0.43599100 | -2.53040200 |
| 25 | C  | 0.37258400  | -4.80041700 | -1.70213000 |
| 26 | H  | -0.23829800 | -4.73677700 | -0.78518700 |
| 27 | C  | -0.54749500 | -4.48343900 | -2.88695000 |
| 28 | H  | -0.03899200 | -4.63192200 | -3.85744200 |
| 29 | H  | -1.42197300 | -5.15759600 | -2.87138700 |
| 30 | H  | -0.90955300 | -3.44281400 | -2.83811500 |
| 31 | C  | 0.94770500  | -6.22794700 | -1.80123100 |
| 32 | H  | 1.56640100  | -6.48343400 | -0.92228200 |
| 33 | H  | 0.12939200  | -6.96759200 | -1.86344100 |
| 34 | H  | 1.57777300  | -6.34220400 | -2.70261300 |
| 35 | C  | 4.77146700  | -0.93853000 | -0.79788400 |
| 36 | H  | 5.73631300  | -1.47948000 | -0.74637100 |

|    |   |             |             |             |
|----|---|-------------|-------------|-------------|
| 1  | H | 4.83831100  | -0.17900200 | -1.59098900 |
| 2  | H | 4.62133800  | -0.42996800 | 0.16663400  |
| 3  | C | -5.22384500 | -2.20141100 | 1.10704300  |
| 4  | C | -6.58005300 | -2.37293500 | 1.42478100  |
| 5  | C | -4.26381300 | -2.85951500 | 1.89729600  |
| 6  | C | -6.97428900 | -3.17858100 | 2.49852400  |
| 7  | H | -7.34169900 | -1.86713100 | 0.82140700  |
| 8  | C | -4.65536800 | -3.66408500 | 2.97063000  |
| 9  | H | -3.19730100 | -2.74734000 | 1.67552800  |
| 10 | C | -6.01144000 | -3.82741700 | 3.27595100  |
| 11 | H | -8.03822600 | -3.29743200 | 2.72703800  |
| 12 | H | -3.89305600 | -4.16782200 | 3.57346700  |
| 13 | H | -6.31527800 | -4.45799600 | 4.11747800  |
| 14 | H | -4.55255600 | -2.67995900 | -1.79345800 |

15

16

**TS3<sub>minor</sub>**

|    |                                              |  |                             |
|----|----------------------------------------------|--|-----------------------------|
| 17 | Zero-point correction=                       |  | 0.981379 (Hartree/Particle) |
| 18 | Thermal correction to Energy=                |  | 1.039167                    |
| 19 | Thermal correction to Enthalpy=              |  | 1.040111                    |
| 20 | Thermal correction to Gibbs Free Energy=     |  | 0.883402                    |
| 21 | Sum of electronic and zero-point Energies=   |  | -3363.988712                |
| 22 | Sum of electronic and thermal Energies=      |  | -3363.930923                |
| 23 | Sum of electronic and thermal Enthalpies=    |  | -3363.929979                |
| 24 | Sum of electronic and thermal Free Energies= |  | -3364.086688                |

25

Cartesian Coordinates

| 26 | Atom  | X           | Y          | Z          |
|----|-------|-------------|------------|------------|
| 27 | ----- |             |            |            |
| 28 | O     | -1.49233900 | 1.67218500 | 0.74744800 |
| 29 | H     | -0.21493900 | 1.77081500 | 0.93234500 |
| 30 | C     | 1.04167400  | 1.67356400 | 1.36443200 |
| 31 | C     | 1.22379700  | 2.97386300 | 2.12187700 |
| 32 | C     | 2.28366100  | 3.88350200 | 1.95321600 |
| 33 | C     | 0.25796800  | 3.27889000 | 3.10313200 |
| 34 | C     | 2.36859500  | 5.04909500 | 2.72316700 |
| 35 | H     | 3.05740900  | 3.68144600 | 1.21135600 |
| 36 | C     | 0.34269200  | 4.43882300 | 3.87480400 |

|    |   |             |             |             |
|----|---|-------------|-------------|-------------|
| 1  | H | -0.57263800 | 2.58413200  | 3.25081300  |
| 2  | C | 1.39986300  | 5.33670900  | 3.68787700  |
| 3  | H | 3.20934300  | 5.73426200  | 2.56939000  |
| 4  | H | -0.42545600 | 4.64465300  | 4.62803300  |
| 5  | H | 1.46967500  | 6.24744600  | 4.29143300  |
| 6  | C | 1.69047200  | 1.42174200  | 0.07296800  |
| 7  | O | 1.81412000  | 0.32274500  | -0.49376200 |
| 8  | O | 2.03072000  | 2.55116600  | -0.57756900 |
| 9  | C | 2.27635500  | 2.64631300  | -2.01960000 |
| 10 | C | 1.02838100  | 2.19989000  | -2.78513500 |
| 11 | H | 0.16321400  | 2.77391400  | -2.41009900 |
| 12 | H | 1.14142200  | 2.43038000  | -3.85847600 |
| 13 | H | 0.82286700  | 1.12518100  | -2.67486200 |
| 14 | C | 2.47111200  | 4.15867400  | -2.22627100 |
| 15 | H | 2.68503100  | 4.36935600  | -3.28784200 |
| 16 | H | 1.55590800  | 4.69916100  | -1.93049000 |
| 17 | H | 3.30545000  | 4.54676700  | -1.62059900 |
| 18 | C | 3.56255500  | 1.90330100  | -2.41001200 |
| 19 | C | 3.59039400  | 0.93176400  | -3.42174800 |
| 20 | C | 4.77760100  | 2.24924000  | -1.79148400 |
| 21 | C | 4.79819400  | 0.34699900  | -3.82242900 |
| 22 | H | 2.66426100  | 0.60488100  | -3.89651100 |
| 23 | C | 5.98393600  | 1.66580800  | -2.18682100 |
| 24 | H | 4.78488300  | 2.98769100  | -0.98463100 |
| 25 | C | 6.00114900  | 0.71527400  | -3.21371600 |
| 26 | H | 4.79307000  | -0.40240400 | -4.62080600 |
| 27 | H | 6.91550900  | 1.95743600  | -1.69125600 |
| 28 | H | 6.94549200  | 0.26312300  | -3.53325800 |
| 29 | N | 0.87672000  | 0.51852800  | 2.20631700  |
| 30 | H | 0.07118500  | -0.06838400 | 1.99807400  |
| 31 | C | 1.76755800  | 0.02583200  | 3.13082000  |
| 32 | C | 1.39387800  | -1.09039800 | 3.92400700  |
| 33 | C | 3.05739400  | 0.57077400  | 3.33507100  |
| 34 | C | 2.27196300  | -1.63653700 | 4.85770200  |
| 35 | H | 0.39543200  | -1.51891500 | 3.78890800  |
| 36 | C | 3.92412600  | 0.01478200  | 4.28086900  |

|    |   |             |             |             |
|----|---|-------------|-------------|-------------|
| 1  | H | 3.37449900  | 1.43887300  | 2.75525500  |
| 2  | C | 3.55136200  | -1.09407000 | 5.04782000  |
| 3  | H | 1.94939100  | -2.49813600 | 5.45294200  |
| 4  | H | 4.91404000  | 0.46391800  | 4.41790000  |
| 5  | H | 4.23594500  | -1.51994400 | 5.78705900  |
| 6  | H | -2.12621100 | 0.34994700  | -0.30678800 |
| 7  | C | -5.33684100 | 4.53513000  | -0.42834500 |
| 8  | C | -4.25471900 | 3.64928300  | -0.40554200 |
| 9  | C | -4.04178100 | 2.77884800  | -1.49283700 |
| 10 | C | -4.89581400 | 2.79712500  | -2.60167600 |
| 11 | C | -5.98133300 | 3.68040600  | -2.61422800 |
| 12 | C | -6.19914200 | 4.54284200  | -1.53121200 |
| 13 | H | -5.50707900 | 5.22154000  | 0.40721700  |
| 14 | H | -4.71367000 | 2.14410300  | -3.46147900 |
| 15 | H | -6.65365300 | 3.70712800  | -3.47728800 |
| 16 | H | -7.04611000 | 5.23614500  | -1.55296800 |
| 17 | C | -2.80093800 | 1.95817600  | -1.26843200 |
| 18 | H | -2.14064100 | 1.91615400  | -2.14785900 |
| 19 | C | -2.07883600 | 2.63008400  | -0.02843000 |
| 20 | H | -1.34231400 | 3.34900300  | -0.45516600 |
| 21 | C | -3.05254300 | -0.45539900 | -2.05484100 |
| 22 | C | -4.14604300 | 0.16234400  | 0.04021600  |
| 23 | C | -3.79401700 | -1.66791100 | -1.50872600 |
| 24 | H | -3.61969200 | 0.03284700  | -2.86398200 |
| 25 | H | -2.02312200 | -0.66673500 | -2.38695800 |
| 26 | H | -4.80516500 | 1.03258800  | 0.15263800  |
| 27 | H | -3.69758300 | -0.06986400 | 1.01589500  |
| 28 | H | -3.09561000 | -2.29261000 | -0.92968400 |
| 29 | N | -3.00003900 | 0.50314100  | -0.89276200 |
| 30 | C | 3.38874300  | -2.67445100 | -1.34497700 |
| 31 | C | 2.33070000  | -3.62306300 | -1.50362200 |
| 32 | C | 1.53813900  | -4.06225800 | -0.40419700 |
| 33 | C | 1.84516900  | -3.48922800 | 0.87816100  |
| 34 | C | 2.88980700  | -2.55534300 | 1.05596000  |
| 35 | C | 3.66620100  | -2.11862400 | -0.06671900 |
| 36 | H | 3.91949900  | -2.30424200 | -2.22433000 |

|    |    |             |             |             |
|----|----|-------------|-------------|-------------|
| 1  | H  | 2.06936400  | -3.93996600 | -2.51380700 |
| 2  | H  | 1.19523600  | -3.71312600 | 1.72748600  |
| 3  | H  | 3.03953400  | -2.09640400 | 2.03448300  |
| 4  | Ru | 1.47873100  | -1.86727700 | -0.55450300 |
| 5  | Cl | 0.42280900  | -1.39256300 | -2.70697200 |
| 6  | Cl | -0.77269900 | -1.68081000 | 0.44958100  |
| 7  | C  | 0.39925000  | -5.06250200 | -0.52739700 |
| 8  | H  | -0.39776400 | -4.69242100 | 0.14109500  |
| 9  | C  | 0.85768400  | -6.44067400 | -0.00911200 |
| 10 | H  | 1.66707500  | -6.85320300 | -0.63957800 |
| 11 | H  | 0.01670500  | -7.15704800 | -0.02610500 |
| 12 | H  | 1.23291800  | -6.38551100 | 1.02855300  |
| 13 | C  | -0.19488700 | -5.16432400 | -1.93793400 |
| 14 | H  | -0.46816100 | -4.16966200 | -2.32900800 |
| 15 | H  | -1.10224800 | -5.79355900 | -1.91558600 |
| 16 | H  | 0.50981000  | -5.63637200 | -2.64771300 |
| 17 | C  | 4.72836500  | -1.07378400 | 0.11380800  |
| 18 | H  | 4.46775900  | -0.38459800 | 0.93276600  |
| 19 | H  | 4.88694700  | -0.49381300 | -0.80728500 |
| 20 | H  | 5.68230400  | -1.56857200 | 0.38091100  |
| 21 | C  | -3.20571400 | 3.46093700  | 0.66307200  |
| 22 | H  | -2.83210400 | 4.41369400  | 1.07584700  |
| 23 | H  | -3.59678200 | 2.87502300  | 1.51603000  |
| 24 | C  | -4.87205000 | -1.04661700 | -0.59237300 |
| 25 | H  | -5.67679100 | -0.65381300 | -1.23842500 |
| 26 | C  | -5.50124600 | -1.98818200 | 0.41808600  |
| 27 | C  | -6.88775100 | -2.20309800 | 0.42208500  |
| 28 | C  | -4.71659600 | -2.66678000 | 1.36838800  |
| 29 | C  | -7.48110100 | -3.07090700 | 1.34550200  |
| 30 | H  | -7.51487000 | -1.68273000 | -0.31001100 |
| 31 | C  | -5.30683400 | -3.53277600 | 2.29237400  |
| 32 | H  | -3.63098700 | -2.52275400 | 1.38897300  |
| 33 | C  | -6.69129600 | -3.73868600 | 2.28491200  |
| 34 | H  | -8.56498800 | -3.22318000 | 1.32957400  |
| 35 | H  | -4.67923000 | -4.05104800 | 3.02426200  |
| 36 | H  | -7.15154200 | -4.41725800 | 3.00996600  |

|    |                                              |                                |              |                    |
|----|----------------------------------------------|--------------------------------|--------------|--------------------|
| 1  | H                                            | -4.23013300                    | -2.28462300  | -2.31144000        |
| 2  |                                              |                                |              |                    |
| 3  |                                              | <b>TS_Ru-N<sub>ylide</sub></b> |              |                    |
| 4  | Zero-point correction=                       |                                | 0.653291     | (Hartree/Particle) |
| 5  | Thermal correction to Energy=                |                                | 0.695907     |                    |
| 6  | Thermal correction to Enthalpy=              |                                | 0.696852     |                    |
| 7  | Thermal correction to Gibbs Free Energy=     |                                | 0.575065     |                    |
| 8  | Sum of electronic and zero-point Energies=   |                                | -2612.757477 |                    |
| 9  | Sum of electronic and thermal Energies=      |                                | -2612.714860 |                    |
| 10 | Sum of electronic and thermal Enthalpies=    |                                | -2612.713916 |                    |
| 11 | Sum of electronic and thermal Free Energies= |                                | -2612.835702 |                    |
| 12 |                                              | Cartesian Coordinates          |              |                    |
| 13 | Atom                                         | X                              | Y            | Z                  |
| 14 | -----                                        |                                |              |                    |
| 15 | C                                            | 4.48631700                     | -0.27475900  | -1.43053400        |
| 16 | C                                            | 4.14911500                     | 0.97208600   | -0.80695500        |
| 17 | C                                            | 3.75252900                     | 1.05516500   | 0.54616700         |
| 18 | C                                            | 3.47875700                     | -0.19948300  | 1.19374600         |
| 19 | C                                            | 3.70707500                     | -1.43921900  | 0.55269100         |
| 20 | C                                            | 4.29295600                     | -1.48927700  | -0.76410300        |
| 21 | H                                            | 4.81581200                     | -0.27240800  | -2.47185000        |
| 22 | H                                            | 4.25418300                     | 1.88241800   | -1.39789000        |
| 23 | H                                            | 3.05342700                     | -0.20963600  | 2.19911400         |
| 24 | H                                            | 3.46140500                     | -2.36531500  | 1.07527800         |
| 25 | Ru                                           | 2.20215100                     | -0.26451300  | -0.64507200        |
| 26 | Cl                                           | 1.13258500                     | -2.26962000  | -1.48608500        |
| 27 | Cl                                           | 1.36877200                     | 0.90625500   | -2.59936100        |
| 28 | C                                            | 0.63366700                     | 0.04746300   | 0.50447300         |
| 29 | C                                            | 0.12009400                     | 1.32001700   | 0.99385400         |
| 30 | C                                            | -0.60322000                    | 1.40740500   | 2.21503000         |
| 31 | C                                            | 0.30543000                     | 2.51508000   | 0.25295400         |
| 32 | C                                            | -1.08377700                    | 2.62766000   | 2.68102800         |
| 33 | H                                            | -0.76806900                    | 0.51183300   | 2.81806900         |
| 34 | C                                            | -0.19351300                    | 3.72983200   | 0.71690300         |
| 35 | H                                            | 0.81585500                     | 2.45345700   | -0.71031200        |
| 36 | C                                            | -0.88174100                    | 3.79527000   | 1.93385500         |

|    |   |             |             |             |
|----|---|-------------|-------------|-------------|
| 1  | H | -1.62880900 | 2.67022000  | 3.62877100  |
| 2  | H | -0.05515100 | 4.63463500  | 0.11751200  |
| 3  | H | -1.27329000 | 4.75126300  | 2.29481400  |
| 4  | C | 0.21709500  | -1.15875900 | 1.32558800  |
| 5  | O | 0.90840700  | -1.51640500 | 2.25967000  |
| 6  | O | -0.93807100 | -1.71422500 | 0.97008400  |
| 7  | C | -1.47670900 | -2.94567800 | 1.60455000  |
| 8  | C | 3.65134000  | 2.35733100  | 1.32690000  |
| 9  | H | 2.67426200  | 2.35206000  | 1.84111100  |
| 10 | C | 4.74672400  | 2.39203400  | 2.41452200  |
| 11 | H | 5.75526500  | 2.39327900  | 1.96170100  |
| 12 | H | 4.64762800  | 3.30551600  | 3.02780900  |
| 13 | H | 4.68132200  | 1.52351000  | 3.09315400  |
| 14 | C | 3.71991700  | 3.61691500  | 0.45549500  |
| 15 | H | 2.96414300  | 3.60500800  | -0.34674000 |
| 16 | H | 3.53710500  | 4.51178200  | 1.07531800  |
| 17 | H | 4.71605300  | 3.73526300  | -0.00912100 |
| 18 | C | 4.56870900  | -2.81453800 | -1.41239500 |
| 19 | H | 5.23162700  | -3.42771500 | -0.77523400 |
| 20 | H | 3.61612000  | -3.35927200 | -1.54771600 |
| 21 | H | 5.04086400  | -2.68988900 | -2.40019600 |
| 22 | C | -4.36436700 | 3.07727800  | -1.01748700 |
| 23 | C | -3.25431900 | 3.20938700  | -1.86433300 |
| 24 | C | -2.29561500 | 2.20395800  | -1.97565700 |
| 25 | C | -2.42024600 | 1.00858500  | -1.22921300 |
| 26 | C | -3.53717100 | 0.87753900  | -0.36756700 |
| 27 | C | -4.48375400 | 1.89156100  | -0.27160100 |
| 28 | H | -3.13074300 | 4.12618500  | -2.45241300 |
| 29 | H | -1.43443400 | 2.32759900  | -2.63775100 |
| 30 | H | -3.65055500 | -0.03869300 | 0.21999400  |
| 31 | H | -5.33482100 | 1.77540300  | 0.40551600  |
| 32 | N | -1.47204200 | 0.02542000  | -1.31213400 |
| 33 | H | -0.70829700 | 0.09692300  | -1.98555600 |
| 34 | H | -1.62214900 | -0.87063300 | -0.86330500 |
| 35 | C | -0.43039400 | -4.07290700 | 1.57569800  |
| 36 | H | -0.00060500 | -4.17544200 | 0.56665600  |

|    |   |             |             |             |
|----|---|-------------|-------------|-------------|
| 1  | H | 0.38680600  | -3.87560800 | 2.28503500  |
| 2  | H | -0.92425200 | -5.02189200 | 1.84747900  |
| 3  | C | -1.88164500 | -2.59896900 | 3.04002300  |
| 4  | H | -2.63592300 | -1.79454900 | 3.05923100  |
| 5  | H | -2.30103700 | -3.48465200 | 3.54583500  |
| 6  | H | -0.99598000 | -2.27361300 | 3.60585400  |
| 7  | C | -2.65994600 | -3.31715300 | 0.70150400  |
| 8  | C | -2.45274300 | -3.44805100 | -0.68483500 |
| 9  | C | -3.94212300 | -3.57473400 | 1.20922800  |
| 10 | C | -3.49830600 | -3.81981100 | -1.53274900 |
| 11 | H | -1.46349200 | -3.24906400 | -1.10765800 |
| 12 | C | -4.98875400 | -3.95433500 | 0.35966900  |
| 13 | H | -4.14547600 | -3.48414800 | 2.27808400  |
| 14 | C | -4.77217700 | -4.07682200 | -1.01400700 |
| 15 | H | -3.31412700 | -3.90707500 | -2.60804900 |
| 16 | H | -5.98032800 | -4.14966100 | 0.78026900  |
| 17 | H | -5.59133900 | -4.36850600 | -1.67868900 |
| 18 | C | -5.42579800 | 4.14650700  | -0.94142500 |
| 19 | H | -6.29755300 | 3.85333200  | -1.56901300 |
| 20 | H | -5.02727600 | 5.08923600  | -1.37362700 |
| 21 | O | -5.83738800 | 4.32942500  | 0.40502400  |
| 22 | H | -6.64561500 | 4.86686500  | 0.40490800  |

23

24

**Ru-N<sub>ytide</sub>**

|    |                                              |  |                             |
|----|----------------------------------------------|--|-----------------------------|
| 25 | Zero-point correction=                       |  | 0.657449 (Hartree/Particle) |
| 26 | Thermal correction to Energy=                |  | 0.699292                    |
| 27 | Thermal correction to Enthalpy=              |  | 0.700237                    |
| 28 | Thermal correction to Gibbs Free Energy=     |  | 0.580656                    |
| 29 | Sum of electronic and zero-point Energies=   |  | -2612.784711                |
| 30 | Sum of electronic and thermal Energies=      |  | -2612.742867                |
| 31 | Sum of electronic and thermal Enthalpies=    |  | -2612.741923                |
| 32 | Sum of electronic and thermal Free Energies= |  | -2612.861504                |

33

Cartesian Coordinates

| 34 | Atom  | X          | Y           | Z           |
|----|-------|------------|-------------|-------------|
| 35 | ----- |            |             |             |
| 36 | C     | 3.89348900 | -1.98854900 | -1.14004200 |

|    |    |             |             |             |
|----|----|-------------|-------------|-------------|
| 1  | C  | 4.24710900  | -0.62492500 | -0.98041200 |
| 2  | C  | 3.97301100  | 0.10596100  | 0.21916100  |
| 3  | C  | 3.22980800  | -0.58553100 | 1.22115700  |
| 4  | C  | 2.85826100  | -1.95538700 | 1.08286600  |
| 5  | C  | 3.18125200  | -2.66993300 | -0.10562300 |
| 6  | H  | 4.08607000  | -2.49095900 | -2.09004000 |
| 7  | H  | 4.69575500  | -0.10695000 | -1.82920800 |
| 8  | H  | 2.90464800  | -0.04602100 | 2.11318700  |
| 9  | H  | 2.25899400  | -2.42646000 | 1.86300900  |
| 10 | Ru | 2.05924900  | -0.77082300 | -0.62473800 |
| 11 | Cl | 0.32195900  | -2.21416200 | -1.60806800 |
| 12 | Cl | 1.76451800  | 0.67425700  | -2.61836700 |
| 13 | C  | 0.30682800  | 0.38240000  | 0.31250700  |
| 14 | C  | 0.75777300  | 1.72247500  | 0.85804800  |
| 15 | C  | 0.97898100  | 1.95268400  | 2.23359600  |
| 16 | C  | 0.96368700  | 2.81415500  | -0.01372600 |
| 17 | C  | 1.38050000  | 3.20670200  | 2.70645800  |
| 18 | H  | 0.83025800  | 1.14047200  | 2.94436600  |
| 19 | C  | 1.35976500  | 4.06557000  | 0.46225200  |
| 20 | H  | 0.84469200  | 2.68803200  | -1.09036300 |
| 21 | C  | 1.57183000  | 4.27565300  | 1.82810200  |
| 22 | H  | 1.53714900  | 3.34407900  | 3.78153900  |
| 23 | H  | 1.50622200  | 4.88352400  | -0.25048500 |
| 24 | H  | 1.88056500  | 5.25718800  | 2.20085600  |
| 25 | C  | -0.27705400 | -0.57390300 | 1.32258300  |
| 26 | O  | 0.26503500  | -0.86822800 | 2.37184100  |
| 27 | O  | -1.47038700 | -1.06192500 | 0.93578100  |
| 28 | C  | -2.21823400 | -2.08780000 | 1.69014600  |
| 29 | C  | 4.44532700  | 1.53244100  | 0.45918100  |
| 30 | H  | 3.62295700  | 2.05298900  | 0.97867400  |
| 31 | C  | 5.66220000  | 1.52099600  | 1.40811400  |
| 32 | H  | 6.52030000  | 0.99599600  | 0.94859100  |
| 33 | H  | 5.98018900  | 2.55408200  | 1.63771200  |
| 34 | H  | 5.43092600  | 1.01797900  | 2.36397500  |
| 35 | C  | 4.75584400  | 2.31641900  | -0.82261400 |
| 36 | H  | 3.91282200  | 2.27791600  | -1.53230600 |

|    |   |             |             |             |
|----|---|-------------|-------------|-------------|
| 1  | H | 4.95197900  | 3.37414900  | -0.57353700 |
| 2  | H | 5.65845300  | 1.92893300  | -1.33127200 |
| 3  | C | 2.77246300  | -4.10658300 | -0.27871600 |
| 4  | H | 3.61686400  | -4.76425700 | 0.00474700  |
| 5  | H | 1.90995500  | -4.35643900 | 0.35861700  |
| 6  | H | 2.49841500  | -4.31995600 | -1.32353700 |
| 7  | C | -4.13876200 | 3.00317200  | -0.97507300 |
| 8  | C | -3.52041000 | 2.54316800  | -2.14735100 |
| 9  | C | -2.37304300 | 1.75378200  | -2.08448800 |
| 10 | C | -1.83409800 | 1.40994800  | -0.83987800 |
| 11 | C | -2.43109100 | 1.86352700  | 0.33342600  |
| 12 | C | -3.58000800 | 2.65843300  | 0.26012400  |
| 13 | H | -3.93529000 | 2.80583400  | -3.12664900 |
| 14 | H | -1.89320400 | 1.40351800  | -3.00383500 |
| 15 | H | -2.00874600 | 1.61383400  | 1.30626500  |
| 16 | H | -4.05346300 | 3.02167200  | 1.17357900  |
| 17 | N | -0.63704100 | 0.55152500  | -0.85979000 |
| 18 | H | -0.01454400 | 0.83209500  | -1.66288600 |
| 19 | H | -0.88662700 | -0.42832000 | -1.12096400 |
| 20 | C | -1.36303300 | -3.35855700 | 1.83508100  |
| 21 | H | -0.95589900 | -3.65727400 | 0.85530600  |
| 22 | H | -0.52761600 | -3.19245500 | 2.53218100  |
| 23 | H | -1.99395400 | -4.17873900 | 2.21903400  |
| 24 | C | -2.60056600 | -1.51640100 | 3.05996700  |
| 25 | H | -3.22696300 | -0.61469000 | 2.95366400  |
| 26 | H | -3.16315500 | -2.26466200 | 3.64273600  |
| 27 | H | -1.69226000 | -1.25704600 | 3.62156800  |
| 28 | C | -3.43359500 | -2.38219900 | 0.79759200  |
| 29 | C | -3.23481300 | -2.69358300 | -0.55998400 |
| 30 | C | -4.74542700 | -2.39622700 | 1.29473500  |
| 31 | C | -4.31382800 | -3.00509000 | -1.39001100 |
| 32 | H | -2.22287900 | -2.68984100 | -0.97400800 |
| 33 | C | -5.82752500 | -2.71348100 | 0.46441500  |
| 34 | H | -4.94613900 | -2.15900700 | 2.34114300  |
| 35 | C | -5.61745000 | -3.01792200 | -0.88160700 |
| 36 | H | -4.13179100 | -3.24126700 | -2.44336700 |

|   |   |             |             |             |
|---|---|-------------|-------------|-------------|
| 1 | H | -6.84101100 | -2.71753100 | 0.87842800  |
| 2 | H | -6.46321900 | -3.26417300 | -1.53155500 |
| 3 | C | -5.38816300 | 3.85234800  | -1.06336700 |
| 4 | H | -6.18426200 | 3.26202500  | -1.56798800 |
| 5 | H | -5.18031900 | 4.72786700  | -1.71648200 |
| 6 | O | -5.79279800 | 4.25804300  | 0.22481800  |
| 7 | H | -6.60464700 | 4.78210600  | 0.14645100  |

8

9

**TS\_Ru-O<sub>ylide</sub>**

|    |                                              |  |                             |              |
|----|----------------------------------------------|--|-----------------------------|--------------|
| 10 | Zero-point correction=                       |  | 0.653886 (Hartree/Particle) |              |
| 11 | Thermal correction to Energy=                |  |                             | 0.696034     |
| 12 | Thermal correction to Enthalpy=              |  |                             | 0.696978     |
| 13 | Thermal correction to Gibbs Free Energy=     |  |                             | 0.576585     |
| 14 | Sum of electronic and zero-point Energies=   |  |                             | -2612.750471 |
| 15 | Sum of electronic and thermal Energies=      |  |                             | -2612.708323 |
| 16 | Sum of electronic and thermal Enthalpies=    |  |                             | -2612.707378 |
| 17 | Sum of electronic and thermal Free Energies= |  |                             | -2612.827772 |

18

Cartesian Coordinates

|    |       |            |             |             |
|----|-------|------------|-------------|-------------|
| 19 | Atom  | X          | Y           | Z           |
| 20 | ----- |            |             |             |
| 21 | C     | 3.63276700 | 0.25562800  | -2.60226500 |
| 22 | C     | 3.92012200 | 0.92404200  | -1.36750500 |
| 23 | C     | 4.00226900 | 0.23510900  | -0.13415700 |
| 24 | C     | 3.53116200 | -1.12098100 | -0.14942400 |
| 25 | C     | 3.14907300 | -1.77039000 | -1.35061700 |
| 26 | C     | 3.27140000 | -1.09809000 | -2.61863300 |
| 27 | H     | 3.61736700 | 0.83402000  | -3.52856000 |
| 28 | H     | 4.12973100 | 1.99367000  | -1.40437100 |
| 29 | H     | 3.44320700 | -1.67632800 | 0.78653900  |
| 30 | H     | 2.78068100 | -2.79666900 | -1.31024800 |
| 31 | Ru    | 1.84313300 | 0.01779800  | -1.03833200 |
| 32 | Cl    | 0.00494900 | -0.95029100 | -2.27572000 |
| 33 | Cl    | 0.88321900 | 2.24028200  | -1.44793900 |
| 34 | C     | 0.77175300 | -0.29179400 | 0.63109700  |
| 35 | C     | 1.04156700 | 0.38703000  | 1.92014700  |
| 36 | C     | 0.96810200 | -0.30045700 | 3.15433800  |

|    |   |             |             |             |
|----|---|-------------|-------------|-------------|
| 1  | C | 1.36976800  | 1.76162900  | 1.94787500  |
| 2  | C | 1.23250300  | 0.35399000  | 4.35879900  |
| 3  | H | 0.72743900  | -1.36503400 | 3.17485900  |
| 4  | C | 1.60773200  | 2.41788600  | 3.15540800  |
| 5  | H | 1.40552600  | 2.30725200  | 1.00145100  |
| 6  | C | 1.54902300  | 1.71650900  | 4.36568700  |
| 7  | H | 1.18445100  | -0.20412500 | 5.29894000  |
| 8  | H | 1.84571600  | 3.48618100  | 3.15188000  |
| 9  | H | 1.74586300  | 2.23070900  | 5.31174600  |
| 10 | C | 0.25121200  | -1.71285700 | 0.78383100  |
| 11 | O | 1.07523000  | -2.59087300 | 0.97357900  |
| 12 | O | -1.05596800 | -1.87707400 | 0.77068600  |
| 13 | C | -1.70380500 | -3.20332400 | 0.78671000  |
| 14 | C | 4.59160600  | 0.83253900  | 1.13468600  |
| 15 | H | 3.89485300  | 0.60104600  | 1.95875500  |
| 16 | C | 5.93218700  | 0.13676700  | 1.45535600  |
| 17 | H | 6.67645300  | 0.32361500  | 0.65949700  |
| 18 | H | 6.34587700  | 0.52010100  | 2.40553000  |
| 19 | H | 5.81307700  | -0.95628600 | 1.55682200  |
| 20 | C | 4.77530700  | 2.35406100  | 1.08334900  |
| 21 | H | 3.84019500  | 2.87315400  | 0.81606900  |
| 22 | H | 5.09822100  | 2.72704100  | 2.07093200  |
| 23 | H | 5.55159600  | 2.64459100  | 0.35183900  |
| 24 | C | 2.90564600  | -1.81305500 | -3.88634300 |
| 25 | H | 3.48506800  | -2.74897900 | -3.98410000 |
| 26 | H | 1.83022600  | -2.06864600 | -3.86008800 |
| 27 | H | 3.09158000  | -1.18463500 | -4.77225800 |
| 28 | H | -0.73122300 | 1.28325900  | -0.48676700 |
| 29 | C | -1.10935200 | -4.11432100 | -0.30260300 |
| 30 | H | -1.07055200 | -3.57828000 | -1.26469700 |
| 31 | H | -0.09272100 | -4.44333300 | -0.04047300 |
| 32 | H | -1.75833000 | -4.99963600 | -0.41716500 |
| 33 | C | -1.52327800 | -3.80428800 | 2.18497300  |
| 34 | H | -1.99511300 | -3.16791300 | 2.95288600  |
| 35 | H | -1.97517500 | -4.80861900 | 2.23828200  |
| 36 | H | -0.45022300 | -3.90785000 | 2.40699800  |

|    |   |             |             |             |
|----|---|-------------|-------------|-------------|
| 1  | C | -3.16357400 | -2.89237200 | 0.43474600  |
| 2  | C | -3.44581300 | -1.94676400 | -0.56719100 |
| 3  | C | -4.23318100 | -3.57617200 | 1.03261500  |
| 4  | C | -4.76433700 | -1.70061500 | -0.95948200 |
| 5  | H | -2.62622100 | -1.39351200 | -1.03244200 |
| 6  | C | -5.55340800 | -3.32892000 | 0.63818300  |
| 7  | H | -4.05143300 | -4.31587500 | 1.81585800  |
| 8  | C | -5.82435100 | -2.39077100 | -0.36057500 |
| 9  | H | -4.96134400 | -0.95803500 | -1.73901800 |
| 10 | H | -6.37186100 | -3.87459900 | 1.11887800  |
| 11 | H | -6.85641800 | -2.19734700 | -0.67060100 |
| 12 | O | -1.12318000 | 0.69021100  | 0.20392000  |
| 13 | C | -1.87220900 | 1.45380500  | 1.15341700  |
| 14 | H | -2.33349300 | 0.71410100  | 1.82559300  |
| 15 | H | -1.19222300 | 2.08902100  | 1.75187700  |
| 16 | C | -2.92328200 | 2.30798200  | 0.48802800  |
| 17 | C | -2.59680500 | 3.56512000  | -0.04765300 |
| 18 | C | -4.24685500 | 1.86282400  | 0.34668200  |
| 19 | C | -3.55003800 | 4.35074300  | -0.69170800 |
| 20 | H | -1.56954500 | 3.93608400  | 0.03143900  |
| 21 | C | -5.21196000 | 2.64193000  | -0.28894200 |
| 22 | H | -4.53067700 | 0.88275100  | 0.74311100  |
| 23 | C | -4.88081900 | 3.90349900  | -0.82495800 |
| 24 | H | -3.26490200 | 5.32481900  | -1.10339100 |
| 25 | H | -6.23815500 | 2.26986000  | -0.38070700 |
| 26 | N | -5.82476000 | 4.66199700  | -1.50232400 |
| 27 | H | -6.80139600 | 4.45264300  | -1.32360500 |
| 28 | H | -5.62896200 | 5.65123000  | -1.61490900 |

29

30

**Ru-O<sub>ylide</sub>**

|    |                                            |  |                             |
|----|--------------------------------------------|--|-----------------------------|
| 31 | Zero-point correction=                     |  | 0.654603 (Hartree/Particle) |
| 32 | Thermal correction to Energy=              |  | 0.696528                    |
| 33 | Thermal correction to Enthalpy=            |  | 0.697473                    |
| 34 | Thermal correction to Gibbs Free Energy=   |  | 0.578085                    |
| 35 | Sum of electronic and zero-point Energies= |  | -2612.766570                |
| 36 | Sum of electronic and thermal Energies=    |  | -2612.724644                |

|    |                                              |             |             |              |
|----|----------------------------------------------|-------------|-------------|--------------|
| 1  | Sum of electronic and thermal Enthalpies=    |             |             | -2612.723700 |
| 2  | Sum of electronic and thermal Free Energies= |             |             | -2612.843087 |
| 3  | Cartesian Coordinates                        |             |             |              |
| 4  | Atom                                         | X           | Y           | Z            |
| 5  | -----                                        |             |             |              |
| 6  | C                                            | 3.15766800  | -1.11540000 | -2.63221200  |
| 7  | C                                            | 3.69118600  | -0.06086400 | -1.84483800  |
| 8  | C                                            | 3.84434800  | -0.15965600 | -0.42663700  |
| 9  | C                                            | 3.29589900  | -1.32674600 | 0.18142800   |
| 10 | C                                            | 2.72991000  | -2.38953100 | -0.58372200  |
| 11 | C                                            | 2.66498000  | -2.29642800 | -2.00451100  |
| 12 | H                                            | 3.03835500  | -0.98155900 | -3.70908300  |
| 13 | H                                            | 3.96527200  | 0.86800000  | -2.34779400  |
| 14 | H                                            | 3.28577600  | -1.40542400 | 1.27116800   |
| 15 | H                                            | 2.28896200  | -3.24330900 | -0.06783100  |
| 16 | Ru                                           | 1.66746800  | -0.49322100 | -1.03637500  |
| 17 | Cl                                           | -0.37632600 | -1.26073000 | -2.11042900  |
| 18 | Cl                                           | 0.96885800  | 1.80279500  | -1.72118800  |
| 19 | C                                            | 0.39918600  | -0.13642100 | 0.78398400   |
| 20 | C                                            | 1.15461000  | 0.56704700  | 1.89735100   |
| 21 | C                                            | 1.62192700  | -0.09326600 | 3.05250100   |
| 22 | C                                            | 1.41164200  | 1.95221500  | 1.79604800   |
| 23 | C                                            | 2.30428900  | 0.60206000  | 4.05753200   |
| 24 | H                                            | 1.45172200  | -1.16402700 | 3.16546800   |
| 25 | C                                            | 2.08236400  | 2.64474500  | 2.80606000   |
| 26 | H                                            | 1.09965000  | 2.49298100  | 0.90024100   |
| 27 | C                                            | 2.53529700  | 1.97522600  | 3.94800300   |
| 28 | H                                            | 2.65006100  | 0.05643500  | 4.94171800   |
| 29 | H                                            | 2.26049300  | 3.71894400  | 2.69073400   |
| 30 | H                                            | 3.06291200  | 2.51679500  | 4.73921200   |
| 31 | C                                            | -0.18899500 | -1.47640600 | 1.16432400   |
| 32 | O                                            | 0.49434000  | -2.38345200 | 1.60206500   |
| 33 | O                                            | -1.51480200 | -1.54184800 | 1.00561400   |
| 34 | C                                            | -2.29462800 | -2.77781400 | 1.19323000   |
| 35 | C                                            | 4.56024000  | 0.88690900  | 0.41320200   |
| 36 | H                                            | 4.00585600  | 0.96429100  | 1.36376100   |

|    |   |             |             |             |
|----|---|-------------|-------------|-------------|
| 1  | C | 5.98561900  | 0.39757900  | 0.74555600  |
| 2  | H | 6.59143200  | 0.28418300  | -0.17266100 |
| 3  | H | 6.49878700  | 1.12245700  | 1.40336600  |
| 4  | H | 5.97131100  | -0.57822700 | 1.26293300  |
| 5  | C | 4.59390100  | 2.28390800  | -0.22093600 |
| 6  | H | 3.58726100  | 2.61175500  | -0.52984900 |
| 7  | H | 4.99015500  | 3.01528700  | 0.50548100  |
| 8  | H | 5.25497800  | 2.31541200  | -1.10699000 |
| 9  | C | 2.06634700  | -3.40664600 | -2.82198300 |
| 10 | H | 2.87400200  | -4.07987800 | -3.16969400 |
| 11 | H | 1.35151800  | -3.99714600 | -2.22859600 |
| 12 | H | 1.53357800  | -3.01174600 | -3.70053500 |
| 13 | H | -0.32527100 | 1.31299200  | -0.51165400 |
| 14 | C | -1.71686100 | -3.92122400 | 0.33944200  |
| 15 | H | -1.54784600 | -3.57522400 | -0.69320100 |
| 16 | H | -0.76238500 | -4.28009800 | 0.75236300  |
| 17 | H | -2.43978200 | -4.75527500 | 0.32176800  |
| 18 | C | -2.28776700 | -3.13587200 | 2.68334100  |
| 19 | H | -2.74040200 | -2.33223700 | 3.28895200  |
| 20 | H | -2.85198600 | -4.06673800 | 2.86064500  |
| 21 | H | -1.25251100 | -3.29689500 | 3.01791300  |
| 22 | C | -3.68449400 | -2.40314400 | 0.65966600  |
| 23 | C | -3.78798500 | -1.75170100 | -0.58379300 |
| 24 | C | -4.86574600 | -2.73443600 | 1.33954900  |
| 25 | C | -5.03890000 | -1.44725900 | -1.12657600 |
| 26 | H | -2.87695700 | -1.48033600 | -1.12592700 |
| 27 | C | -6.11936500 | -2.42838500 | 0.79472700  |
| 28 | H | -4.82639800 | -3.23905000 | 2.30729200  |
| 29 | C | -6.21177100 | -1.78367200 | -0.44007400 |
| 30 | H | -5.09580100 | -0.94596000 | -2.09841700 |
| 31 | H | -7.02684000 | -2.69702400 | 1.34509300  |
| 32 | H | -7.19129400 | -1.54557700 | -0.86706200 |
| 33 | O | -0.68583600 | 0.75963300  | 0.29975200  |
| 34 | C | -1.72140400 | 1.40858200  | 1.15785100  |
| 35 | H | -2.42925400 | 0.60046000  | 1.37277700  |
| 36 | H | -1.21393500 | 1.73282300  | 2.07722100  |

|    |   |             |            |             |
|----|---|-------------|------------|-------------|
| 1  | C | -2.34129600 | 2.54825900 | 0.41932500  |
| 2  | C | -1.90944700 | 3.87039000 | 0.62145300  |
| 3  | C | -3.36838800 | 2.32658400 | -0.51576600 |
| 4  | C | -2.47800600 | 4.93275600 | -0.07400100 |
| 5  | H | -1.11336600 | 4.07411300 | 1.34537000  |
| 6  | C | -3.94090000 | 3.37908000 | -1.22078500 |
| 7  | H | -3.72584300 | 1.30682800 | -0.69056300 |
| 8  | C | -3.50491100 | 4.70726500 | -1.01654600 |
| 9  | H | -2.12361700 | 5.95332300 | 0.10370200  |
| 10 | H | -4.73737700 | 3.17955200 | -1.94501400 |
| 11 | N | -4.04302500 | 5.74891700 | -1.74222800 |
| 12 | H | -4.91672000 | 5.59573400 | -2.23268300 |
| 13 | H | -3.88590500 | 6.69649700 | -1.41864700 |

14

15

**S<sub>0</sub>-2a**

|    |                                              |  |                             |             |
|----|----------------------------------------------|--|-----------------------------|-------------|
| 16 | Zero-point correction=                       |  | 0.295672 (Hartree/Particle) |             |
| 17 | Thermal correction to Energy=                |  |                             | 0.314549    |
| 18 | Thermal correction to Enthalpy=              |  |                             | 0.315493    |
| 19 | Thermal correction to Gibbs Free Energy=     |  |                             | 0.245413    |
| 20 | Sum of electronic and zero-point Energies=   |  |                             | -917.067720 |
| 21 | Sum of electronic and thermal Energies=      |  |                             | -917.048844 |
| 22 | Sum of electronic and thermal Enthalpies=    |  |                             | -917.047900 |
| 23 | Sum of electronic and thermal Free Energies= |  |                             | -917.117980 |

24

Cartesian Coordinates

| 25 | Atom  | X           | Y           | Z           |
|----|-------|-------------|-------------|-------------|
| 26 | ----- |             |             |             |
| 27 | C     | 0.63206800  | -0.73765800 | 0.00013100  |
| 28 | C     | 1.61828500  | 0.36077600  | -0.00004600 |
| 29 | O     | -0.62944200 | -0.24576100 | 0.00019600  |
| 30 | C     | 3.09360900  | 0.23734400  | -0.00001600 |
| 31 | C     | 3.72161200  | -1.02145400 | -0.00036800 |
| 32 | C     | 3.90268700  | 1.38974000  | 0.00034400  |
| 33 | C     | 5.11316600  | -1.11056600 | -0.00035400 |
| 34 | H     | 3.11690600  | -1.91777000 | -0.00062800 |
| 35 | C     | 5.29076200  | 1.28785400  | 0.00034300  |
| 36 | H     | 3.45156700  | 2.37819500  | 0.00064700  |

|    |                                            |             |                             |             |
|----|--------------------------------------------|-------------|-----------------------------|-------------|
| 1  | C                                          | 5.90752400  | 0.03572100                  | -0.00000600 |
| 2  | H                                          | 5.57645600  | -2.09379000                 | -0.00063200 |
| 3  | H                                          | 5.89016400  | 2.19433500                  | 0.00062900  |
| 4  | H                                          | 6.99096600  | -0.04360900                 | -0.00000200 |
| 5  | O                                          | 0.93084400  | -1.91760100                 | 0.00021100  |
| 6  | N                                          | 0.69011500  | 2.63327500                  | -0.00032300 |
| 7  | N                                          | 1.10629800  | 1.57338200                  | -0.00019500 |
| 8  | C                                          | -1.80746800 | -1.12792900                 | 0.00006600  |
| 9  | C                                          | -1.79718400 | -1.98031500                 | 1.27910000  |
| 10 | H                                          | -2.71912200 | -2.56562100                 | 1.34410300  |
| 11 | H                                          | -0.94653900 | -2.66336600                 | 1.28375200  |
| 12 | H                                          | -1.74696500 | -1.33239700                 | 2.16001800  |
| 13 | C                                          | -1.79705000 | -1.98020200                 | -1.27903200 |
| 14 | H                                          | -0.94638800 | -2.66324700                 | -1.28367400 |
| 15 | H                                          | -2.71892300 | -2.56563200                 | -1.34406900 |
| 16 | H                                          | -1.74686800 | -1.33227900                 | -2.15993300 |
| 17 | C                                          | -3.01382000 | -0.17970500                 | 0.00003300  |
| 18 | C                                          | -2.88252600 | 1.21375100                  | 0.00005300  |
| 19 | C                                          | -4.30812800 | -0.72370100                 | -0.00002800 |
| 20 | C                                          | -4.01084800 | 2.03773700                  | -0.00000300 |
| 21 | H                                          | -1.89733300 | 1.66152100                  | 0.00012400  |
| 22 | C                                          | -5.43404900 | 0.09750400                  | -0.00008500 |
| 23 | H                                          | -4.44604700 | -1.80164900                 | -0.00003000 |
| 24 | C                                          | -5.29047800 | 1.48615200                  | -0.00007800 |
| 25 | H                                          | -3.88168800 | 3.11693500                  | 0.00001400  |
| 26 | H                                          | -6.42440400 | -0.35019300                 | -0.00013800 |
| 27 | H                                          | -6.16684800 | 2.12857600                  | -0.00012800 |
| 28 |                                            |             |                             |             |
| 29 |                                            |             | <b>*S<sub>n</sub>-2a</b>    |             |
| 30 | Zero-point correction=                     |             | 0.294007 (Hartree/Particle) |             |
| 31 | Thermal correction to Energy=              |             |                             | 0.311111    |
| 32 | Thermal correction to Enthalpy=            |             |                             | 0.312056    |
| 33 | Thermal correction to Gibbs Free Energy=   |             |                             | 0.248521    |
| 34 | Sum of electronic and zero-point Energies= |             |                             | -916.976833 |
| 35 | Sum of electronic and thermal Energies=    |             |                             | -916.959728 |
| 36 | Sum of electronic and thermal Enthalpies=  |             |                             | -916.958784 |

|    |                                              |                       |             |             |
|----|----------------------------------------------|-----------------------|-------------|-------------|
| 1  | Sum of electronic and thermal Free Energies= |                       |             | -917.022318 |
| 2  |                                              | Cartesian Coordinates |             |             |
| 3  | Atom                                         | X                     | Y           | Z           |
| 4  | -----                                        |                       |             |             |
| 5  | C                                            | 0.63206800            | -0.73765800 | 0.00013100  |
| 6  | C                                            | 1.61828500            | 0.36077600  | -0.00004600 |
| 7  | O                                            | -0.62944200           | -0.24576100 | 0.00019600  |
| 8  | C                                            | 3.09360900            | 0.23734400  | -0.00001600 |
| 9  | C                                            | 3.72161200            | -1.02145400 | -0.00036800 |
| 10 | C                                            | 3.90268700            | 1.38974000  | 0.00034400  |
| 11 | C                                            | 5.11316600            | -1.11056600 | -0.00035400 |
| 12 | H                                            | 3.11690600            | -1.91777000 | -0.00062800 |
| 13 | C                                            | 5.29076200            | 1.28785400  | 0.00034300  |
| 14 | H                                            | 3.45156700            | 2.37819500  | 0.00064700  |
| 15 | C                                            | 5.90752400            | 0.03572100  | -0.00000600 |
| 16 | H                                            | 5.57645600            | -2.09379000 | -0.00063200 |
| 17 | H                                            | 5.89016400            | 2.19433500  | 0.00062900  |
| 18 | H                                            | 6.99096600            | -0.04360900 | -0.00000200 |
| 19 | O                                            | 0.93084400            | -1.91760100 | 0.00021100  |
| 20 | N                                            | 0.69011500            | 2.63327500  | -0.00032300 |
| 21 | N                                            | 1.10629800            | 1.57338200  | -0.00019500 |
| 22 | C                                            | -1.80746800           | -1.12792900 | 0.00006600  |
| 23 | C                                            | -1.79718400           | -1.98031500 | 1.27910000  |
| 24 | H                                            | -2.71912200           | -2.56562100 | 1.34410300  |
| 25 | H                                            | -0.94653900           | -2.66336600 | 1.28375200  |
| 26 | H                                            | -1.74696500           | -1.33239700 | 2.16001800  |
| 27 | C                                            | -1.79705000           | -1.98020200 | -1.27903200 |
| 28 | H                                            | -0.94638800           | -2.66324700 | -1.28367400 |
| 29 | H                                            | -2.71892300           | -2.56563200 | -1.34406900 |
| 30 | H                                            | -1.74686800           | -1.33227900 | -2.15993300 |
| 31 | C                                            | -3.01382000           | -0.17970500 | 0.00003300  |
| 32 | C                                            | -2.88252600           | 1.21375100  | 0.00005300  |
| 33 | C                                            | -4.30812800           | -0.72370100 | -0.00002800 |
| 34 | C                                            | -4.01084800           | 2.03773700  | -0.00000300 |
| 35 | H                                            | -1.89733300           | 1.66152100  | 0.00012400  |
| 36 | C                                            | -5.43404900           | 0.09750400  | -0.00008500 |

|    |                                              |             |                             |             |
|----|----------------------------------------------|-------------|-----------------------------|-------------|
| 1  | H                                            | -4.44604700 | -1.80164900                 | -0.00003000 |
| 2  | C                                            | -5.29047800 | 1.48615200                  | -0.00007800 |
| 3  | H                                            | -3.88168800 | 3.11693500                  | 0.00001400  |
| 4  | H                                            | -6.42440400 | -0.35019300                 | -0.00013800 |
| 5  | H                                            | -6.16684800 | 2.12857600                  | -0.00012800 |
| 6  |                                              |             |                             |             |
| 7  |                                              |             | <b>S<sub>I</sub>-2a</b>     |             |
| 8  | Zero-point correction=                       |             | 0.295197 (Hartree/Particle) |             |
| 9  | Thermal correction to Energy=                |             |                             | 0.313867    |
| 10 | Thermal correction to Enthalpy=              |             |                             | 0.314811    |
| 11 | Thermal correction to Gibbs Free Energy=     |             |                             | 0.246057    |
| 12 | Sum of electronic and zero-point Energies=   |             |                             | -917.006484 |
| 13 | Sum of electronic and thermal Energies=      |             |                             | -916.987814 |
| 14 | Sum of electronic and thermal Enthalpies=    |             |                             | -916.986870 |
| 15 | Sum of electronic and thermal Free Energies= |             |                             | -917.055625 |
| 16 |                                              |             | Cartesian Coordinates       |             |
| 17 | Atom                                         | X           | Y                           | Z           |
| 18 | -----                                        |             |                             |             |
| 19 | C                                            | -0.61160500 | -0.70019500                 | 0.00044000  |
| 20 | C                                            | -1.59669500 | 0.40871300                  | 0.00018900  |
| 21 | O                                            | 0.65278500  | -0.23189900                 | 0.00011300  |
| 22 | C                                            | -3.01855100 | 0.23741800                  | 0.00001900  |
| 23 | C                                            | -3.61638200 | -1.06535200                 | -0.00039500 |
| 24 | C                                            | -3.90862300 | 1.35808000                  | 0.00021400  |
| 25 | C                                            | -4.99142400 | -1.21941000                 | -0.00060000 |
| 26 | H                                            | -2.96952200 | -1.93006700                 | -0.00054000 |
| 27 | C                                            | -5.28163700 | 1.18121600                  | 0.00002000  |
| 28 | H                                            | -3.50536200 | 2.36033700                  | 0.00052300  |
| 29 | C                                            | -5.83875500 | -0.10367200                 | -0.00039200 |
| 30 | H                                            | -5.41323600 | -2.22051000                 | -0.00093200 |
| 31 | H                                            | -5.92893800 | 2.05363200                  | 0.00020000  |
| 32 | H                                            | -6.91729100 | -0.23355300                 | -0.00054500 |
| 33 | O                                            | -0.90622900 | -1.88747700                 | 0.00072700  |
| 34 | N                                            | -1.38259600 | 2.79311500                  | -0.00005600 |
| 35 | N                                            | -0.96692200 | 1.68849200                  | 0.00011700  |
| 36 | C                                            | 1.81890200  | -1.12263100                 | 0.00017100  |

|    |   |            |             |             |
|----|---|------------|-------------|-------------|
| 1  | C | 1.80661900 | -1.97614600 | -1.27858400 |
| 2  | H | 2.72756400 | -2.56337600 | -1.34245900 |
| 3  | H | 0.95427100 | -2.65701100 | -1.28349200 |
| 4  | H | 1.75877500 | -1.32799400 | -2.15946800 |
| 5  | C | 1.80670700 | -1.97578900 | 1.27915900  |
| 6  | H | 0.95432400 | -2.65661100 | 1.28433500  |
| 7  | H | 2.72762600 | -2.56305100 | 1.34310700  |
| 8  | H | 1.75897800 | -1.32739500 | 2.15987100  |
| 9  | C | 3.02802700 | -0.17700100 | -0.00002100 |
| 10 | C | 2.89128700 | 1.21647300  | -0.00019200 |
| 11 | C | 4.32251000 | -0.71965700 | -0.00004900 |
| 12 | C | 4.01911400 | 2.04129400  | -0.00038400 |
| 13 | H | 1.90225800 | 1.65692000  | -0.00016600 |
| 14 | C | 5.44708600 | 0.10376900  | -0.00024100 |
| 15 | H | 4.46208800 | -1.79759700 | 0.00007600  |
| 16 | C | 5.30009100 | 1.49205400  | -0.00041000 |
| 17 | H | 3.88873200 | 3.12046000  | -0.00051100 |
| 18 | H | 6.43857300 | -0.34167000 | -0.00025900 |
| 19 | H | 6.17531800 | 2.13625700  | -0.00056000 |

20

21

**T<sub>n</sub>-2a**

|    |                                              |  |                             |
|----|----------------------------------------------|--|-----------------------------|
| 22 | Zero-point correction=                       |  | 0.293214 (Hartree/Particle) |
| 23 | Thermal correction to Energy=                |  | 0.310757                    |
| 24 | Thermal correction to Enthalpy=              |  | 0.311701                    |
| 25 | Thermal correction to Gibbs Free Energy=     |  | 0.246257                    |
| 26 | Sum of electronic and zero-point Energies=   |  | -917.019944                 |
| 27 | Sum of electronic and thermal Energies=      |  | -917.002401                 |
| 28 | Sum of electronic and thermal Enthalpies=    |  | -917.001457                 |
| 29 | Sum of electronic and thermal Free Energies= |  | -917.066901                 |

30

Cartesian Coordinates

| 31 | Atom  | X           | Y           | Z           |
|----|-------|-------------|-------------|-------------|
| 32 | ----- |             |             |             |
| 33 | C     | -0.61150900 | -0.70047100 | 0.00023300  |
| 34 | C     | -1.59651400 | 0.40855100  | 0.00019600  |
| 35 | O     | 0.65296600  | -0.23233800 | 0.00011400  |
| 36 | C     | -3.01839600 | 0.23742000  | -0.00000500 |

|    |                        |             |                         |                             |
|----|------------------------|-------------|-------------------------|-----------------------------|
| 1  | C                      | -3.61637000 | -1.06527100             | -0.00073200                 |
| 2  | C                      | -3.90837100 | 1.35815300              | 0.00047700                  |
| 3  | C                      | -4.99143300 | -1.21918100             | -0.00094900                 |
| 4  | H                      | -2.96961300 | -1.93006200             | -0.00110000                 |
| 5  | C                      | -5.28141500 | 1.18144200              | 0.00026900                  |
| 6  | H                      | -3.50502400 | 2.36036400              | 0.00102700                  |
| 7  | C                      | -5.83866600 | -0.10337400             | -0.00044900                 |
| 8  | H                      | -5.41333000 | -2.22024200             | -0.00152200                 |
| 9  | H                      | -5.92863300 | 2.05392200              | 0.00067700                  |
| 10 | H                      | -6.91721700 | -0.23313300             | -0.00061600                 |
| 11 | O                      | -0.90626800 | -1.88769500             | 0.00042600                  |
| 12 | N                      | -1.38215500 | 2.79295800              | 0.00046900                  |
| 13 | N                      | -0.96663900 | 1.68827300              | 0.00041600                  |
| 14 | C                      | 1.81908500  | -1.12308400             | 0.00025300                  |
| 15 | C                      | 1.80694000  | -1.97664000             | -1.27849900                 |
| 16 | H                      | 2.72786800  | -2.56390400             | -1.34225400                 |
| 17 | H                      | 0.95458100  | -2.65748600             | -1.28350700                 |
| 18 | H                      | 1.75922600  | -1.32852600             | -2.15942100                 |
| 19 | C                      | 1.80707000  | -1.97608800             | 1.27936600                  |
| 20 | H                      | 0.95471800  | -2.65693800             | 1.28474500                  |
| 21 | H                      | 2.72800800  | -2.56332000             | 1.34329100                  |
| 22 | H                      | 1.75943200  | -1.32760100             | 2.16001800                  |
| 23 | C                      | 3.02789700  | -0.17712200             | -0.00003200                 |
| 24 | C                      | 2.89058500  | 1.21628000              | -0.00041200                 |
| 25 | C                      | 4.32258700  | -0.71928600             | 0.00007800                  |
| 26 | C                      | 4.01807700  | 2.04155700              | -0.00068100                 |
| 27 | H                      | 1.90135900  | 1.65631000              | -0.00048800                 |
| 28 | C                      | 5.44682900  | 0.10459400              | -0.00018900                 |
| 29 | H                      | 4.46259400  | -1.79716800             | 0.00037600                  |
| 30 | C                      | 5.29927200  | 1.49282400              | -0.00057400                 |
| 31 | H                      | 3.88725900  | 3.12067000              | -0.00097500                 |
| 32 | H                      | 6.43849500  | -0.34044400             | -0.00009400                 |
| 33 | H                      | 6.17424100  | 2.13737700              | -0.00078500                 |
| 34 |                        |             |                         |                             |
| 35 |                        |             | <b>T<sub>I</sub>-2a</b> |                             |
| 36 | Zero-point correction= |             |                         | 0.293443 (Hartree/Particle) |

|    |                                              |             |             |             |
|----|----------------------------------------------|-------------|-------------|-------------|
| 1  | Thermal correction to Energy=                |             |             | 0.312462    |
| 2  | Thermal correction to Enthalpy=              |             |             | 0.313406    |
| 3  | Thermal correction to Gibbs Free Energy=     |             |             | 0.243275    |
| 4  | Sum of electronic and zero-point Energies=   |             |             | -917.023262 |
| 5  | Sum of electronic and thermal Energies=      |             |             | -917.004242 |
| 6  | Sum of electronic and thermal Enthalpies=    |             |             | -917.003298 |
| 7  | Sum of electronic and thermal Free Energies= |             |             | -917.073430 |
| 8  | Cartesian Coordinates                        |             |             |             |
| 9  | Atom                                         | X           | Y           | Z           |
| 10 | -----                                        |             |             |             |
| 11 | C                                            | -0.65989800 | -0.63094300 | 0.49945800  |
| 12 | C                                            | -1.66453000 | 0.48294200  | 0.43206800  |
| 13 | O                                            | 0.56757700  | -0.19842800 | 0.19196900  |
| 14 | C                                            | -3.02856100 | 0.27451600  | 0.01868500  |
| 15 | C                                            | -3.50548800 | -0.98720600 | -0.42769600 |
| 16 | C                                            | -3.93879500 | 1.36737900  | 0.02030900  |
| 17 | C                                            | -4.82036700 | -1.13613900 | -0.84693900 |
| 18 | H                                            | -2.83856700 | -1.83867100 | -0.42539000 |
| 19 | C                                            | -5.24933500 | 1.20277700  | -0.39953000 |
| 20 | H                                            | -3.58964600 | 2.33651400  | 0.35654000  |
| 21 | C                                            | -5.70082800 | -0.04881900 | -0.83642800 |
| 22 | H                                            | -5.16455400 | -2.10989900 | -1.18388400 |
| 23 | H                                            | -5.92665200 | 2.05208100  | -0.38771000 |
| 24 | H                                            | -6.72879900 | -0.17467000 | -1.16474200 |
| 25 | O                                            | -0.96606600 | -1.77261900 | 0.79789200  |
| 26 | N                                            | -0.27159800 | 2.19726300  | 1.22617000  |
| 27 | N                                            | -1.32782600 | 1.78529600  | 0.81815000  |
| 28 | C                                            | 1.74774600  | -1.08671700 | 0.22485500  |
| 29 | C                                            | 1.55046500  | -2.19641400 | -0.81901000 |
| 30 | H                                            | 2.44491500  | -2.82283500 | -0.87626500 |
| 31 | H                                            | 0.70222300  | -2.82915800 | -0.55365000 |
| 32 | H                                            | 1.38209100  | -1.75692300 | -1.80724900 |
| 33 | C                                            | 1.92827700  | -1.63680100 | 1.64819500  |
| 34 | H                                            | 2.86695500  | -2.19659200 | 1.70496900  |
| 35 | H                                            | 1.98544500  | -0.80993300 | 2.36293400  |
| 36 | H                                            | 1.10516200  | -2.29844900 | 1.92340200  |

|    |   |            |             |             |
|----|---|------------|-------------|-------------|
| 1  | C | 2.93070100 | -0.18268700 | -0.14328600 |
| 2  | C | 2.81082500 | 1.20888400  | -0.24033200 |
| 3  | C | 4.19193900 | -0.76044000 | -0.35753700 |
| 4  | C | 3.92085800 | 1.99660500  | -0.55526600 |
| 5  | H | 1.85300400 | 1.67983000  | -0.05942300 |
| 6  | C | 5.29884900 | 0.02679400  | -0.67045300 |
| 7  | H | 4.32137300 | -1.83643700 | -0.27697000 |
| 8  | C | 5.16720100 | 1.41254100  | -0.77439800 |
| 9  | H | 3.80399400 | 3.07495300  | -0.62518700 |
| 10 | H | 6.26423000 | -0.44538400 | -0.83310400 |
| 11 | H | 6.02836000 | 2.02839600  | -1.01957400 |

12

13

### <sup>3</sup>TS4

|    |                                              |                             |
|----|----------------------------------------------|-----------------------------|
| 14 | Zero-point correction=                       | 0.290874 (Hartree/Particle) |
| 15 | Thermal correction to Energy=                | 0.310337                    |
| 16 | Thermal correction to Enthalpy=              | 0.311282                    |
| 17 | Thermal correction to Gibbs Free Energy=     | 0.239725                    |
| 18 | Sum of electronic and zero-point Energies=   | -917.009530                 |
| 19 | Sum of electronic and thermal Energies=      | -916.990067                 |
| 20 | Sum of electronic and thermal Enthalpies=    | -916.989123                 |
| 21 | Sum of electronic and thermal Free Energies= | -917.060679                 |

22

### Cartesian Coordinates

| 23 | Atom  | X           | Y           | Z           |
|----|-------|-------------|-------------|-------------|
| 24 | ----- |             |             |             |
| 25 | C     | -0.66481100 | -0.74735200 | 0.30763000  |
| 26 | C     | -1.67089100 | 0.31422800  | 0.25933900  |
| 27 | O     | 0.57315600  | -0.26037800 | 0.10613700  |
| 28 | C     | -3.05553800 | 0.22944200  | -0.01995700 |
| 29 | C     | -3.65976800 | -1.00993400 | -0.39280600 |
| 30 | C     | -3.88755500 | 1.38592000  | 0.02180500  |
| 31 | C     | -5.00946900 | -1.07084900 | -0.70444200 |
| 32 | H     | -3.04721900 | -1.90211800 | -0.41433900 |
| 33 | C     | -5.23515000 | 1.30356700  | -0.29173600 |
| 34 | H     | -3.45298700 | 2.33743300  | 0.30175900  |
| 35 | C     | -5.80759200 | 0.07879500  | -0.65743600 |
| 36 | H     | -5.44847900 | -2.02479200 | -0.98397200 |

|    |   |             |             |             |
|----|---|-------------|-------------|-------------|
| 1  | H | -5.84872000 | 2.19943900  | -0.25241000 |
| 2  | H | -6.86459900 | 0.02110400  | -0.90155000 |
| 3  | O | -0.94614500 | -1.92222300 | 0.50886700  |
| 4  | N | -0.16780100 | 2.15819600  | 1.37798500  |
| 5  | N | -1.19192900 | 1.95627100  | 0.92265500  |
| 6  | C | 1.77046600  | -1.11340200 | 0.17820500  |
| 7  | C | 1.68064500  | -2.21088200 | -0.89516000 |
| 8  | H | 2.61769600  | -2.77491300 | -0.92501100 |
| 9  | H | 0.86060900  | -2.89844700 | -0.68397000 |
| 10 | H | 1.52974400  | -1.75812900 | -1.88042200 |
| 11 | C | 1.88264900  | -1.68412900 | 1.60039700  |
| 12 | H | 2.81405900  | -2.24793900 | 1.70644500  |
| 13 | H | 1.89517100  | -0.86812500 | 2.32963900  |
| 14 | H | 1.04597700  | -2.35097200 | 1.81666000  |
| 15 | C | 2.94537900  | -0.17543200 | -0.12724600 |
| 16 | C | 2.76821300  | 1.17144200  | -0.46408300 |
| 17 | C | 4.25307100  | -0.68423000 | -0.08624200 |
| 18 | C | 3.86766800  | 1.98543000  | -0.74775100 |
| 19 | H | 1.77004800  | 1.58750100  | -0.49825800 |
| 20 | C | 5.34987300  | 0.12758500  | -0.36976200 |
| 21 | H | 4.42483600  | -1.72668200 | 0.16880700  |
| 22 | C | 5.16173000  | 1.47022300  | -0.70262300 |
| 23 | H | 3.70504900  | 3.02923000  | -1.00369700 |
| 24 | H | 6.35205300  | -0.29121800 | -0.32984700 |
| 25 | H | 6.01526700  | 2.10563500  | -0.92314000 |

26

27

**<sup>3</sup>carbene**

|    |                                              |                             |
|----|----------------------------------------------|-----------------------------|
| 28 | Zero-point correction=                       | 0.284213 (Hartree/Particle) |
| 29 | Thermal correction to Energy=                | 0.301281                    |
| 30 | Thermal correction to Enthalpy=              | 0.302225                    |
| 31 | Thermal correction to Gibbs Free Energy=     | 0.236644                    |
| 32 | Sum of electronic and zero-point Energies=   | -807.515685                 |
| 33 | Sum of electronic and thermal Energies=      | -807.498618                 |
| 34 | Sum of electronic and thermal Enthalpies=    | -807.497674                 |
| 35 | Sum of electronic and thermal Free Energies= | -807.563255                 |

36

Cartesian Coordinates

| 1  | Atom  | X           | Y           | Z           |
|----|-------|-------------|-------------|-------------|
| 2  | ----- |             |             |             |
| 3  | C     | -0.72691400 | -0.66791000 | -0.00031000 |
| 4  | C     | -1.72529600 | 0.37304100  | -0.00029900 |
| 5  | O     | 0.51891900  | -0.14786200 | -0.00030200 |
| 6  | C     | -3.12929400 | 0.41321600  | -0.00012100 |
| 7  | C     | -3.92883800 | -0.76998800 | 0.00006100  |
| 8  | C     | -3.79299400 | 1.67316800  | -0.00012700 |
| 9  | C     | -5.31282600 | -0.67632600 | 0.00022900  |
| 10 | H     | -3.42852100 | -1.73112900 | 0.00006600  |
| 11 | C     | -5.17778200 | 1.74511500  | 0.00004200  |
| 12 | H     | -3.19316200 | 2.57830300  | -0.00026700 |
| 13 | C     | -5.94602700 | 0.57352700  | 0.00022100  |
| 14 | H     | -5.90938200 | -1.58483400 | 0.00036800  |
| 15 | H     | -5.66694900 | 2.71536100  | 0.00003500  |
| 16 | H     | -7.03074100 | 0.63426700  | 0.00035400  |
| 17 | O     | -1.00632100 | -1.86330900 | 0.00000700  |
| 18 | C     | 1.72038400  | -0.98861600 | -0.00004700 |
| 19 | C     | 1.74000700  | -1.84311600 | -1.27813600 |
| 20 | H     | 2.67963300  | -2.40007600 | -1.34175200 |
| 21 | H     | 0.91037700  | -2.55215900 | -1.28191600 |
| 22 | H     | 1.66893900  | -1.19848600 | -2.15997500 |
| 23 | C     | 1.73969900  | -1.84282100 | 1.27824400  |
| 24 | H     | 2.67933200  | -2.39973000 | 1.34222100  |
| 25 | H     | 1.66839400  | -1.19798900 | 2.15991700  |
| 26 | H     | 0.91009200  | -2.55189000 | 1.28198500  |
| 27 | C     | 2.89130100  | 0.00323100  | -0.00000400 |
| 28 | C     | 2.70003600  | 1.39006700  | -0.00008700 |
| 29 | C     | 4.20651700  | -0.48676900 | 0.00015100  |
| 30 | C     | 3.79311600  | 2.26012600  | -0.00002000 |
| 31 | H     | 1.69329400  | 1.78871000  | -0.00020800 |
| 32 | C     | 5.29716400  | 0.38111000  | 0.00021700  |
| 33 | H     | 4.38879700  | -1.55827000 | 0.00022400  |
| 34 | C     | 5.09500600  | 1.76245700  | 0.00013100  |
| 35 | H     | 3.62010500  | 3.33334600  | -0.00008900 |
| 36 | H     | 6.30569000  | -0.02419900 | 0.00033700  |

|    |                                              |             |             |                             |
|----|----------------------------------------------|-------------|-------------|-----------------------------|
| 1  | H                                            | 5.94377100  | 2.44108300  | 0.00018300                  |
| 2  |                                              |             |             |                             |
| 3  |                                              |             |             |                             |
|    |                                              |             |             |                             |
| 3  |                                              |             |             |                             |
|    |                                              |             |             |                             |
| 4  | Zero-point correction=                       |             |             | 0.291550 (Hartree/Particle) |
| 5  | Thermal correction to Energy=                |             |             | 0.311007                    |
| 6  | Thermal correction to Enthalpy=              |             |             | 0.311952                    |
| 7  | Thermal correction to Gibbs Free Energy=     |             |             | 0.241418                    |
| 8  | Sum of electronic and zero-point Energies=   |             |             | -917.015110                 |
| 9  | Sum of electronic and thermal Energies=      |             |             | -916.995653                 |
| 10 | Sum of electronic and thermal Enthalpies=    |             |             | -916.994709                 |
| 11 | Sum of electronic and thermal Free Energies= |             |             | -917.065242                 |
| 12 |                                              |             |             |                             |
|    |                                              |             |             |                             |
|    |                                              |             |             |                             |
| 12 |                                              |             |             |                             |
|    |                                              |             |             |                             |
| 13 | Atom                                         | X           | Y           | Z                           |
| 14 |                                              |             |             |                             |
|    |                                              |             |             |                             |
| 15 | C                                            | 0.66769700  | -0.82298800 | 0.59886200                  |
| 16 | C                                            | 1.74008600  | 0.09342000  | 0.90250000                  |
| 17 | O                                            | -0.53676200 | -0.29693200 | 0.29428700                  |
| 18 | C                                            | 3.00339300  | 0.08413900  | 0.19530600                  |
| 19 | C                                            | 3.27348900  | -0.77657400 | -0.89503600                 |
| 20 | C                                            | 4.03756100  | 0.93574400  | 0.64719800                  |
| 21 | C                                            | 4.52736400  | -0.78819700 | -1.49492500                 |
| 22 | H                                            | 2.50038400  | -1.45857600 | -1.23262400                 |
| 23 | C                                            | 5.27729900  | 0.95227500  | 0.01902400                  |
| 24 | H                                            | 3.84038500  | 1.58077400  | 1.49838400                  |
| 25 | C                                            | 5.52573200  | 0.08474200  | -1.04962700                 |
| 26 | H                                            | 4.72717600  | -1.46605200 | -2.32020500                 |
| 27 | H                                            | 6.05760700  | 1.62146800  | 0.37035000                  |
| 28 | H                                            | 6.50034700  | 0.08297000  | -1.53060700                 |
| 29 | O                                            | 0.91395200  | -2.01641100 | 0.77407200                  |
| 30 | N                                            | 0.73541600  | 2.86733400  | 1.08287900                  |
| 31 | N                                            | 0.97629400  | 1.88850800  | 0.61034000                  |
| 32 | C                                            | -1.74806400 | -1.12970900 | 0.25250100                  |
| 33 | C                                            | -1.97914400 | -1.73944900 | 1.64418900                  |
| 34 | H                                            | -2.92038300 | -2.29679300 | 1.66236800                  |
| 35 | H                                            | -1.16538500 | -2.41860700 | 1.90357800                  |
| 36 | H                                            | -2.04067900 | -0.94545000 | 2.39510700                  |

|    |   |             |             |             |
|----|---|-------------|-------------|-------------|
| 1  | C | -1.59834400 | -2.20019300 | -0.84184100 |
| 2  | H | -0.80795700 | -2.90731000 | -0.58654000 |
| 3  | H | -2.54005500 | -2.74509300 | -0.95995100 |
| 4  | H | -1.36348900 | -1.72407500 | -1.79949600 |
| 5  | C | -2.88265600 | -0.16420700 | -0.11450900 |
| 6  | C | -2.65710700 | 1.18165400  | -0.42548800 |
| 7  | C | -4.20141100 | -0.64324300 | -0.16273600 |
| 8  | C | -3.71779400 | 2.02362100  | -0.76889800 |
| 9  | H | -1.64888300 | 1.57355500  | -0.39848800 |
| 10 | C | -5.26022900 | 0.19576600  | -0.50547000 |
| 11 | H | -4.41134900 | -1.68421500 | 0.06802000  |
| 12 | C | -5.02315400 | 1.53735700  | -0.81015300 |
| 13 | H | -3.51663400 | 3.06565800  | -1.00432200 |
| 14 | H | -6.27170700 | -0.20112300 | -0.53373400 |
| 15 | H | -5.84718600 | 2.19374700  | -1.07663000 |

16

17

**<sup>1</sup>carbene**

|    |                                              |  |                             |             |
|----|----------------------------------------------|--|-----------------------------|-------------|
| 18 | Zero-point correction=                       |  | 0.284230 (Hartree/Particle) |             |
| 19 | Thermal correction to Energy=                |  |                             | 0.301422    |
| 20 | Thermal correction to Enthalpy=              |  |                             | 0.302366    |
| 21 | Thermal correction to Gibbs Free Energy=     |  |                             | 0.236916    |
| 22 | Sum of electronic and zero-point Energies=   |  |                             | -807.508606 |
| 23 | Sum of electronic and thermal Energies=      |  |                             | -807.491414 |
| 24 | Sum of electronic and thermal Enthalpies=    |  |                             | -807.490470 |
| 25 | Sum of electronic and thermal Free Energies= |  |                             | -807.555920 |

26

Cartesian Coordinates

| 27 | Atom  | X           | Y           | Z           |
|----|-------|-------------|-------------|-------------|
| 28 | ----- |             |             |             |
| 29 | C     | 0.78665400  | 1.22911500  | -0.50962000 |
| 30 | C     | 1.85732500  | 0.56101300  | -1.18780100 |
| 31 | O     | -0.32866800 | 0.48559000  | -0.35018300 |
| 32 | C     | 2.94697100  | -0.00725300 | -0.46473200 |
| 33 | C     | 3.09035100  | 0.04382300  | 0.95075200  |
| 34 | C     | 3.94373100  | -0.68650900 | -1.21397200 |
| 35 | C     | 4.17489300  | -0.55260200 | 1.57553800  |
| 36 | H     | 2.34600100  | 0.57911800  | 1.53280500  |

|    |   |             |             |             |
|----|---|-------------|-------------|-------------|
| 1  | C | 5.01450900  | -1.30905500 | -0.58424400 |
| 2  | H | 3.82998500  | -0.70742400 | -2.29315000 |
| 3  | C | 5.12980000  | -1.23551000 | 0.80800000  |
| 4  | H | 4.28393300  | -0.50185800 | 2.65516700  |
| 5  | H | 5.76478600  | -1.83741300 | -1.16513500 |
| 6  | H | 5.97328400  | -1.71041700 | 1.30287700  |
| 7  | O | 0.92664900  | 2.42136900  | -0.23616900 |
| 8  | C | -1.61060800 | 1.06998300  | 0.06115800  |
| 9  | C | -2.02459000 | 2.14574100  | -0.95579300 |
| 10 | H | -3.02388000 | 2.52291600  | -0.71712400 |
| 11 | H | -1.31921900 | 2.97862500  | -0.94270800 |
| 12 | H | -2.05537000 | 1.71604400  | -1.96195000 |
| 13 | C | -1.46972800 | 1.63409600  | 1.48471400  |
| 14 | H | -0.76174200 | 2.46469100  | 1.49624200  |
| 15 | H | -2.43806500 | 1.98891200  | 1.85067900  |
| 16 | H | -1.11959000 | 0.85019200  | 2.16441600  |
| 17 | C | -2.60449400 | -0.09805100 | 0.03869800  |
| 18 | C | -2.23636900 | -1.38766300 | -0.36264100 |
| 19 | C | -3.93582700 | 0.12331100  | 0.42410000  |
| 20 | C | -3.17188600 | -2.42512500 | -0.37498600 |
| 21 | H | -1.21494000 | -1.57771700 | -0.66739900 |
| 22 | C | -4.86974800 | -0.91136600 | 0.41154400  |
| 23 | H | -4.25434600 | 1.11411900  | 0.73742900  |
| 24 | C | -4.49098700 | -2.19419600 | 0.01160800  |
| 25 | H | -2.86265900 | -3.41832500 | -0.69088200 |
| 26 | H | -5.89463600 | -0.71319300 | 0.71460600  |
| 27 | H | -5.21738300 | -3.00245100 | 0.00100100  |

28

29

**MECP**

|    |                                            |                             |
|----|--------------------------------------------|-----------------------------|
| 30 | Zero-point correction=                     | 0.284007 (Hartree/Particle) |
| 31 | Thermal correction to Energy=              | 0.292172                    |
| 32 | Thermal correction to Enthalpy=            | 0.292790                    |
| 33 | Thermal correction to Gibbs Free Energy=   | 0.257011                    |
| 34 | Sum of electronic and zero-point Energies= | -807.504969                 |
| 35 | Sum of electronic and thermal Energies=    | -807.496804                 |
| 36 | Sum of electronic and thermal Enthalpies=  | -807.496187                 |

|    |                                              |                       |             |             |
|----|----------------------------------------------|-----------------------|-------------|-------------|
| 1  | Sum of electronic and thermal Free Energies= |                       |             | -807.531966 |
| 2  |                                              | Cartesian Coordinates |             |             |
| 3  | Atom                                         | X                     | Y           | Z           |
| 4  |                                              | -----                 |             |             |
| 5  | C                                            | -0.74140200           | -1.06966900 | -0.51511000 |
| 6  | C                                            | -1.80422700           | -0.23166200 | -0.99800400 |
| 7  | O                                            | 0.41442400            | -0.38853200 | -0.35622100 |
| 8  | C                                            | -3.02352500           | 0.14227100  | -0.40709700 |
| 9  | C                                            | -3.46825600           | -0.37702000 | 0.84594300  |
| 10 | C                                            | -3.85311800           | 1.08830100  | -1.07319900 |
| 11 | C                                            | -4.67539900           | 0.03414600  | 1.38954100  |
| 12 | H                                            | -2.85593800           | -1.11695800 | 1.35145900  |
| 13 | C                                            | -5.04296000           | 1.51610100  | -0.50249600 |
| 14 | H                                            | -3.52127900           | 1.47227600  | -2.03295000 |
| 15 | C                                            | -5.45973300           | 0.98807700  | 0.72578200  |
| 16 | H                                            | -5.00900000           | -0.37667200 | 2.33840400  |
| 17 | H                                            | -5.65746100           | 2.25249900  | -1.01247100 |
| 18 | H                                            | -6.39796000           | 1.31689100  | 1.16422600  |
| 19 | O                                            | -0.90156400           | -2.27811400 | -0.36310900 |
| 20 | C                                            | 1.68368100            | -1.05373900 | -0.04069000 |
| 21 | C                                            | 2.03849100            | -2.00944900 | -1.19141900 |
| 22 | H                                            | 3.02871200            | -2.44599600 | -1.02880700 |
| 23 | H                                            | 1.30599300            | -2.81596200 | -1.26098400 |
| 24 | H                                            | 2.06258800            | -1.45972700 | -2.13782100 |
| 25 | C                                            | 1.56336100            | -1.77645500 | 1.31128400  |
| 26 | H                                            | 0.84007400            | -2.59121900 | 1.25001300  |
| 27 | H                                            | 2.53465500            | -2.18563500 | 1.60498700  |
| 28 | H                                            | 1.24817400            | -1.06980400 | 2.08605500  |
| 29 | C                                            | 2.71188800            | 0.08110600  | 0.05048600  |
| 30 | C                                            | 2.36743900            | 1.42404200  | -0.14221100 |
| 31 | C                                            | 4.05061300            | -0.22688100 | 0.33811000  |
| 32 | C                                            | 3.33361700            | 2.42859700  | -0.04587100 |
| 33 | H                                            | 1.34069000            | 1.68249800  | -0.36890100 |
| 34 | C                                            | 5.01489500            | 0.77482100  | 0.43381800  |
| 35 | H                                            | 4.35094700            | -1.26018700 | 0.49036600  |
| 36 | C                                            | 4.65980100            | 2.11142400  | 0.24314800  |

|    |                                              |             |                             |              |
|----|----------------------------------------------|-------------|-----------------------------|--------------|
| 1  | H                                            | 3.04194000  | 3.46453500                  | -0.19869800  |
| 2  | H                                            | 6.04446100  | 0.50809700                  | 0.65790300   |
| 3  | H                                            | 5.40953100  | 2.89445500                  | 0.31976800   |
| 4  |                                              |             |                             |              |
| 5  |                                              |             | <b>TS5</b>                  |              |
| 6  | Zero-point correction=                       |             | 0.402693 (Hartree/Particle) |              |
| 7  | Thermal correction to Energy=                |             |                             | 0.426748     |
| 8  | Thermal correction to Enthalpy=              |             |                             | 0.427692     |
| 9  | Thermal correction to Gibbs Free Energy=     |             |                             | 0.343837     |
| 10 | Sum of electronic and zero-point Energies=   |             |                             | -1095.001561 |
| 11 | Sum of electronic and thermal Energies=      |             |                             | -1094.977507 |
| 12 | Sum of electronic and thermal Enthalpies=    |             |                             | -1094.976562 |
| 13 | Sum of electronic and thermal Free Energies= |             |                             | -1095.060418 |
| 14 |                                              |             | Cartesian Coordinates       |              |
| 15 | Atom                                         | X           | Y                           | Z            |
| 16 | -----                                        |             |                             |              |
| 17 | C                                            | 0.59716800  | 0.37079900                  | -0.18079100  |
| 18 | C                                            | 0.88367500  | 1.75324700                  | -0.02018400  |
| 19 | C                                            | 0.22420800  | 2.60129000                  | 0.91408000   |
| 20 | C                                            | 1.85880800  | 2.32877600                  | -0.87873100  |
| 21 | C                                            | 0.52015400  | 3.95488800                  | 0.97361900   |
| 22 | H                                            | -0.52818100 | 2.17335400                  | 1.56994100   |
| 23 | C                                            | 2.16700200  | 3.68021200                  | -0.80376200  |
| 24 | H                                            | 2.35857800  | 1.67019600                  | -1.58150800  |
| 25 | C                                            | 1.49421300  | 4.49021400                  | 0.11882100   |
| 26 | H                                            | 0.00697200  | 4.59963700                  | 1.68143600   |
| 27 | H                                            | 2.91996100  | 4.11054100                  | -1.45737900  |
| 28 | H                                            | 1.72847800  | 5.55046300                  | 0.17310700   |
| 29 | C                                            | -0.29711800 | -0.36165500                 | 0.66708500   |
| 30 | O                                            | 0.10185100  | -1.13528700                 | 1.54194500   |
| 31 | O                                            | -1.59007400 | -0.19679500                 | 0.29117600   |
| 32 | C                                            | -2.64923600 | -1.14610700                 | 0.66195600   |
| 33 | C                                            | -2.24424900 | -2.56033100                 | 0.21775200   |
| 34 | H                                            | -1.36619000 | -2.90217700                 | 0.76877100   |
| 35 | H                                            | -3.06752900 | -3.25840800                 | 0.39753800   |
| 36 | H                                            | -2.02259400 | -2.56688400                 | -0.85415000  |

|    |   |             |             |             |
|----|---|-------------|-------------|-------------|
| 1  | C | -2.88575700 | -1.05351900 | 2.17820500  |
| 2  | H | -3.73193800 | -1.68307400 | 2.47055700  |
| 3  | H | -1.99650300 | -1.37878300 | 2.72043100  |
| 4  | H | -3.12141100 | -0.02136500 | 2.45756000  |
| 5  | C | -3.88886000 | -0.67806700 | -0.11067300 |
| 6  | C | -5.10552300 | -1.35528700 | 0.06606800  |
| 7  | C | -3.85471300 | 0.40189800  | -1.00074600 |
| 8  | C | -6.25264500 | -0.96475700 | -0.62274900 |
| 9  | H | -5.16444100 | -2.20007200 | 0.74734100  |
| 10 | C | -5.00430600 | 0.79402600  | -1.69095000 |
| 11 | H | -2.92500300 | 0.93527800  | -1.15395500 |
| 12 | C | -6.20755700 | 0.11517400  | -1.50635500 |
| 13 | H | -7.18221200 | -1.50643200 | -0.46801100 |
| 14 | H | -4.95322700 | 1.63549100  | -2.37735400 |
| 15 | H | -7.10063400 | 0.42141300  | -2.04450500 |
| 16 | N | 3.03717800  | -0.65335600 | 1.29847200  |
| 17 | H | 3.38333100  | -0.45091900 | 2.22836100  |
| 18 | H | 2.13777400  | -1.12694000 | 1.32326100  |
| 19 | C | 3.99341100  | -1.10449200 | 0.39338600  |
| 20 | C | 5.36716500  | -0.94284100 | 0.65120500  |
| 21 | C | 3.60310500  | -1.68197500 | -0.83089300 |
| 22 | C | 6.31766300  | -1.35485500 | -0.28082700 |
| 23 | H | 5.68433200  | -0.49515100 | 1.59139100  |
| 24 | C | 4.56280200  | -2.09466600 | -1.75075200 |
| 25 | H | 2.54397000  | -1.77571200 | -1.05386700 |
| 26 | C | 5.92712700  | -1.93771300 | -1.48782600 |
| 27 | H | 7.37348500  | -1.22311100 | -0.05582600 |
| 28 | H | 4.23907500  | -2.54125700 | -2.68808900 |
| 29 | H | 6.67021800  | -2.26149900 | -2.21094200 |

30

31

### IN1

|    |                                            |                             |
|----|--------------------------------------------|-----------------------------|
| 32 | Zero-point correction=                     | 0.407439 (Hartree/Particle) |
| 33 | Thermal correction to Energy=              | 0.430229                    |
| 34 | Thermal correction to Enthalpy=            | 0.431173                    |
| 35 | Thermal correction to Gibbs Free Energy=   | 0.352604                    |
| 36 | Sum of electronic and zero-point Energies= | -1095.057121                |

|    |                                              |             |             |              |
|----|----------------------------------------------|-------------|-------------|--------------|
| 1  | Sum of electronic and thermal Energies=      |             |             | -1095.034331 |
| 2  | Sum of electronic and thermal Enthalpies=    |             |             | -1095.033387 |
| 3  | Sum of electronic and thermal Free Energies= |             |             | -1095.111956 |
| 4  | Cartesian Coordinates                        |             |             |              |
| 5  | Atom                                         | X           | Y           | Z            |
| 6  | -----                                        |             |             |              |
| 7  | C                                            | -0.79725900 | 0.21162800  | -0.10834400  |
| 8  | C                                            | -1.29118500 | 1.57133000  | -0.12708700  |
| 9  | C                                            | -0.64059400 | 2.62644900  | 0.56268300   |
| 10 | C                                            | -2.45637200 | 1.91651400  | -0.85577200  |
| 11 | C                                            | -1.12002400 | 3.92954000  | 0.50370100   |
| 12 | H                                            | 0.24415400  | 2.40561900  | 1.14480200   |
| 13 | C                                            | -2.92766100 | 3.22772800  | -0.90673100  |
| 14 | H                                            | -3.02506100 | 1.15271500  | -1.37949400  |
| 15 | C                                            | -2.26529000 | 4.25112000  | -0.23196200  |
| 16 | H                                            | -0.58888900 | 4.70863700  | 1.04629600   |
| 17 | H                                            | -3.82685300 | 3.44321000  | -1.47967500  |
| 18 | H                                            | -2.63387300 | 5.27227200  | -0.27000800  |
| 19 | C                                            | 0.41163100  | -0.39067500 | 0.31373300   |
| 20 | O                                            | 0.68074800  | -1.58700500 | 0.02431000   |
| 21 | O                                            | 1.25306500  | 0.38747100  | 1.04464800   |
| 22 | C                                            | 2.58732400  | -0.10462100 | 1.39499900   |
| 23 | C                                            | 3.19873600  | 1.09142600  | 2.14421800   |
| 24 | H                                            | 2.60832700  | 1.32156900  | 3.03771400   |
| 25 | H                                            | 4.22339900  | 0.85659900  | 2.44911000   |
| 26 | H                                            | 3.22544700  | 1.97786600  | 1.50401000   |
| 27 | C                                            | 2.46879400  | -1.30165600 | 2.34722300   |
| 28 | H                                            | 3.43806000  | -1.52462800 | 2.80594200   |
| 29 | H                                            | 1.77283300  | -1.04277500 | 3.15189600   |
| 30 | H                                            | 2.09628000  | -2.18564700 | 1.83011500   |
| 31 | C                                            | 3.40001200  | -0.37406000 | 0.12482400   |
| 32 | C                                            | 4.30963200  | -1.43318800 | 0.03308500   |
| 33 | C                                            | 3.29749300  | 0.51127900  | -0.95868700  |
| 34 | C                                            | 5.09352800  | -1.60659700 | -1.10995400  |
| 35 | H                                            | 4.40897000  | -2.13920900 | 0.85100500   |
| 36 | C                                            | 4.07453700  | 0.33686800  | -2.10232000  |

|    |   |             |             |             |
|----|---|-------------|-------------|-------------|
| 1  | H | 2.59127100  | 1.33501200  | -0.90776600 |
| 2  | C | 4.97967100  | -0.72364900 | -2.18278200 |
| 3  | H | 5.79073800  | -2.43921700 | -1.15990600 |
| 4  | H | 3.97343700  | 1.03211900  | -2.93204700 |
| 5  | H | 5.58793200  | -0.86010400 | -3.07313400 |
| 6  | N | -1.51491300 | -0.81135800 | -0.90385600 |
| 7  | H | -1.61800900 | -0.52989600 | -1.88753200 |
| 8  | H | -0.77145200 | -1.57824100 | -0.84872800 |
| 9  | C | -2.81453100 | -1.34091800 | -0.42978600 |
| 10 | C | -3.73459800 | -1.80001700 | -1.36837200 |
| 11 | C | -3.06386800 | -1.42197300 | 0.93517700  |
| 12 | C | -4.93905900 | -2.35030200 | -0.92735300 |
| 13 | H | -3.51920600 | -1.72888700 | -2.43274500 |
| 14 | C | -4.26925700 | -1.97697900 | 1.36548200  |
| 15 | H | -2.32816700 | -1.03824500 | 1.63387100  |
| 16 | C | -5.20648500 | -2.44069200 | 0.43953300  |
| 17 | H | -5.66505700 | -2.70484000 | -1.65315100 |
| 18 | H | -4.47665400 | -2.04226600 | 2.42959500  |
| 19 | H | -6.14478900 | -2.86722700 | 0.78208600  |

20

21

### TS6

|    |                                              |  |                             |
|----|----------------------------------------------|--|-----------------------------|
| 22 | Zero-point correction=                       |  | 0.403703 (Hartree/Particle) |
| 23 | Thermal correction to Energy=                |  | 0.426172                    |
| 24 | Thermal correction to Enthalpy=              |  | 0.427116                    |
| 25 | Thermal correction to Gibbs Free Energy=     |  | 0.349369                    |
| 26 | Sum of electronic and zero-point Energies=   |  | -1095.058632                |
| 27 | Sum of electronic and thermal Energies=      |  | -1095.036163                |
| 28 | Sum of electronic and thermal Enthalpies=    |  | -1095.035219                |
| 29 | Sum of electronic and thermal Free Energies= |  | -1095.112966                |

30

### Cartesian Coordinates

| 31 | Atom  | X           | Y          | Z           |
|----|-------|-------------|------------|-------------|
| 32 | ----- |             |            |             |
| 33 | C     | -0.79056500 | 0.25210300 | -0.12241100 |
| 34 | C     | -1.32061400 | 1.59979800 | -0.16004300 |
| 35 | C     | -0.70275100 | 2.67388700 | 0.52633200  |
| 36 | C     | -2.48476600 | 1.90115900 | -0.90456900 |

|    |   |             |             |             |
|----|---|-------------|-------------|-------------|
| 1  | C | -1.21711000 | 3.96381400  | 0.45263900  |
| 2  | H | 0.18282700  | 2.48214100  | 1.11887500  |
| 3  | C | -2.99247900 | 3.19746100  | -0.96968700 |
| 4  | H | -3.01303000 | 1.11180500  | -1.43163800 |
| 5  | C | -2.36442800 | 4.24387800  | -0.29546300 |
| 6  | H | -0.71382200 | 4.76283100  | 0.99259100  |
| 7  | H | -3.89077300 | 3.38509200  | -1.55346800 |
| 8  | H | -2.76144800 | 5.25387200  | -0.34566200 |
| 9  | C | 0.40327500  | -0.30061900 | 0.35417000  |
| 10 | O | 0.63951600  | -1.53979200 | 0.08757300  |
| 11 | O | 1.26084100  | 0.45174400  | 1.06650300  |
| 12 | C | 2.59881100  | -0.05371600 | 1.40682900  |
| 13 | C | 3.23106500  | 1.14704300  | 2.12871400  |
| 14 | H | 2.65417300  | 1.39815600  | 3.02523800  |
| 15 | H | 4.25626400  | 0.90448700  | 2.42498300  |
| 16 | H | 3.26059200  | 2.02242500  | 1.47381600  |
| 17 | C | 2.47269000  | -1.23361300 | 2.37798700  |
| 18 | H | 3.44566500  | -1.46700000 | 2.82298600  |
| 19 | H | 1.79541700  | -0.95076800 | 3.19026000  |
| 20 | H | 2.07702100  | -2.11987500 | 1.88199800  |
| 21 | C | 3.38439300  | -0.35322000 | 0.12737000  |
| 22 | C | 4.26355800  | -1.43731900 | 0.03091100  |
| 23 | C | 3.28428400  | 0.52382300  | -0.96316400 |
| 24 | C | 5.02201900  | -1.64211400 | -1.12393500 |
| 25 | H | 4.35935500  | -2.13750400 | 0.85419200  |
| 26 | C | 4.03536300  | 0.31728900  | -2.11874700 |
| 27 | H | 2.60084800  | 1.36637400  | -0.90915300 |
| 28 | C | 4.91115200  | -0.76717200 | -2.20363700 |
| 29 | H | 5.69646600  | -2.49290200 | -1.17774100 |
| 30 | H | 3.93683300  | 1.00605000  | -2.95400300 |
| 31 | H | 5.49924000  | -0.92846400 | -3.10324500 |
| 32 | N | -1.44620100 | -0.84813700 | -0.85606900 |
| 33 | H | -1.48708900 | -0.67726500 | -1.86538500 |
| 34 | H | -0.51709300 | -1.58689100 | -0.60085200 |
| 35 | C | -2.72673300 | -1.38078200 | -0.40172300 |
| 36 | C | -3.59794700 | -1.94006200 | -1.33685400 |

|   |   |             |             |             |
|---|---|-------------|-------------|-------------|
| 1 | C | -3.03960300 | -1.38608200 | 0.95623300  |
| 2 | C | -4.79765800 | -2.50867200 | -0.90782100 |
| 3 | H | -3.34247200 | -1.93227800 | -2.39476100 |
| 4 | C | -4.24052100 | -1.95789400 | 1.37553000  |
| 5 | H | -2.35307600 | -0.93218800 | 1.66290900  |
| 6 | C | -5.12183300 | -2.52020700 | 0.44951900  |
| 7 | H | -5.47743100 | -2.93955000 | -1.63747300 |
| 8 | H | -4.48851100 | -1.95942400 | 2.43321500  |
| 9 | H | -6.05701900 | -2.96048600 | 0.78311300  |

10

11 **IN2**

|    |                                              |  |                             |              |
|----|----------------------------------------------|--|-----------------------------|--------------|
| 12 | Zero-point correction=                       |  | 0.407314 (Hartree/Particle) |              |
| 13 | Thermal correction to Energy=                |  |                             | 0.430140     |
| 14 | Thermal correction to Enthalpy=              |  |                             | 0.431084     |
| 15 | Thermal correction to Gibbs Free Energy=     |  |                             | 0.352835     |
| 16 | Sum of electronic and zero-point Energies=   |  |                             | -1095.072755 |
| 17 | Sum of electronic and thermal Energies=      |  |                             | -1095.049929 |
| 18 | Sum of electronic and thermal Enthalpies=    |  |                             | -1095.048985 |
| 19 | Sum of electronic and thermal Free Energies= |  |                             | -1095.127234 |

20 Cartesian Coordinates

|    |       |             |             |             |
|----|-------|-------------|-------------|-------------|
| 21 | Atom  | X           | Y           | Z           |
| 22 | ----- |             |             |             |
| 23 | C     | -0.69481200 | 0.05310300  | -0.02633800 |
| 24 | C     | -1.03283600 | 1.48627800  | -0.06799800 |
| 25 | C     | -0.43180000 | 2.45482200  | 0.76733000  |
| 26 | C     | -2.00277300 | 1.94350900  | -0.98545000 |
| 27 | C     | -0.76850000 | 3.80274000  | 0.66414400  |
| 28 | H     | 0.29108800  | 2.14367000  | 1.50914100  |
| 29 | C     | -2.33760300 | 3.29246600  | -1.08085200 |
| 30 | H     | -2.51295900 | 1.23393900  | -1.62814000 |
| 31 | C     | -1.71969300 | 4.23662700  | -0.26090500 |
| 32 | H     | -0.28622200 | 4.51974900  | 1.32452100  |
| 33 | H     | -3.09048600 | 3.60340500  | -1.80105800 |
| 34 | H     | -1.98111700 | 5.28874900  | -0.33408800 |
| 35 | C     | 0.37320100  | -0.53920800 | 0.59234200  |
| 36 | O     | 0.59505700  | -1.86329000 | 0.47825500  |

|    |   |             |             |             |
|----|---|-------------|-------------|-------------|
| 1  | O | 1.23835000  | 0.12479200  | 1.36902000  |
| 2  | C | 2.66624800  | -0.25969500 | 1.44803600  |
| 3  | C | 3.29746100  | 0.96630800  | 2.12548000  |
| 4  | H | 2.84661600  | 1.12761200  | 3.11045900  |
| 5  | H | 4.37262500  | 0.80677600  | 2.25263800  |
| 6  | H | 3.15150400  | 1.86534500  | 1.52097800  |
| 7  | C | 2.80982700  | -1.48122000 | 2.36289600  |
| 8  | H | 3.86067500  | -1.63271200 | 2.63141700  |
| 9  | H | 2.25128700  | -1.29757000 | 3.28567400  |
| 10 | H | 2.42399800  | -2.38860900 | 1.89827700  |
| 11 | C | 3.23867100  | -0.43292400 | 0.04084200  |
| 12 | C | 4.11330900  | -1.47624300 | -0.28379900 |
| 13 | C | 2.92508800  | 0.51027800  | -0.95067500 |
| 14 | C | 4.66506600  | -1.57423400 | -1.56310100 |
| 15 | H | 4.37049800  | -2.22419700 | 0.45883400  |
| 16 | C | 3.46885100  | 0.40844500  | -2.23014600 |
| 17 | H | 2.24210900  | 1.32341200  | -0.72204200 |
| 18 | C | 4.34439800  | -0.63391000 | -2.54139200 |
| 19 | H | 5.34311900  | -2.39200800 | -1.79295700 |
| 20 | H | 3.20865300  | 1.14675800  | -2.98415200 |
| 21 | H | 4.77135200  | -0.71213500 | -3.53769400 |
| 22 | N | -1.48732100 | -0.90021200 | -0.77050100 |
| 23 | H | -1.39626900 | -0.79904900 | -1.77833300 |
| 24 | H | -0.12832500 | -2.15950600 | -0.12359200 |
| 25 | C | -2.81871600 | -1.21248600 | -0.39300600 |
| 26 | C | -3.70127400 | -1.73376700 | -1.35167000 |
| 27 | C | -3.25722700 | -1.06946800 | 0.93049100  |
| 28 | C | -4.99447700 | -2.10699100 | -0.99148600 |
| 29 | H | -3.36785400 | -1.84930100 | -2.38171900 |
| 30 | C | -4.55402200 | -1.44405900 | 1.27928000  |
| 31 | H | -2.58240500 | -0.65937500 | 1.67472600  |
| 32 | C | -5.43174000 | -1.96552900 | 0.32692700  |
| 33 | H | -5.66326000 | -2.50762100 | -1.74910000 |
| 34 | H | -4.87965400 | -1.32304200 | 2.30936900  |
| 35 | H | -6.44087000 | -2.25386400 | 0.60644000  |
| 36 |   |             |             |             |

|    |                                              |             |             |                             |
|----|----------------------------------------------|-------------|-------------|-----------------------------|
| 1  | <b>TS7<sub>major_298K</sub></b>              |             |             |                             |
| 2  | Zero-point correction=                       |             |             | 0.766034 (Hartree/Particle) |
| 3  | Thermal correction to Energy=                |             |             | 0.807413                    |
| 4  | Thermal correction to Enthalpy=              |             |             | 0.808357                    |
| 5  | Thermal correction to Gibbs Free Energy=     |             |             | 0.688209                    |
| 6  | Sum of electronic and zero-point Energies=   |             |             | -1961.339466                |
| 7  | Sum of electronic and thermal Energies=      |             |             | -1961.298087                |
| 8  | Sum of electronic and thermal Enthalpies=    |             |             | -1961.297143                |
| 9  | Sum of electronic and thermal Free Energies= |             |             | -1961.417292                |
| 10 | Cartesian Coordinates                        |             |             |                             |
| 11 | Atom                                         | X           | Y           | Z                           |
| 12 | -----                                        |             |             |                             |
| 13 | C                                            | 2.32846800  | -0.81256500 | -0.38720400                 |
| 14 | C                                            | 3.61310100  | -1.45483800 | 0.06678500                  |
| 15 | C                                            | 3.72764800  | -1.96970900 | 1.37037000                  |
| 16 | C                                            | 4.74391700  | -1.52020200 | -0.76235300                 |
| 17 | C                                            | 4.91244000  | -2.55389300 | 1.81382900                  |
| 18 | H                                            | 2.87450300  | -1.90145200 | 2.03922300                  |
| 19 | C                                            | 5.93457400  | -2.09723200 | -0.31790100                 |
| 20 | H                                            | 4.69153600  | -1.10908300 | -1.76669300                 |
| 21 | C                                            | 6.02516900  | -2.62257000 | 0.97135700                  |
| 22 | H                                            | 4.97155700  | -2.94632000 | 2.82654600                  |
| 23 | H                                            | 6.79389900  | -2.13502600 | -0.98364000                 |
| 24 | H                                            | 6.95269200  | -3.06980000 | 1.31982300                  |
| 25 | C                                            | 1.16463900  | -1.66956300 | -0.63189000                 |
| 26 | O                                            | 0.15543600  | -1.30577500 | -1.25538000                 |
| 27 | O                                            | 1.25344900  | -2.87575900 | -0.01837200                 |
| 28 | C                                            | 0.21978400  | -3.89638000 | -0.11823800                 |
| 29 | C                                            | 0.88250600  | -5.09343600 | 0.58862900                  |
| 30 | H                                            | 1.80212600  | -5.37636800 | 0.06638900                  |
| 31 | H                                            | 0.20122300  | -5.94988400 | 0.60385800                  |
| 32 | H                                            | 1.13512000  | -4.83162300 | 1.62003100                  |
| 33 | C                                            | -0.03891900 | -4.24052500 | -1.59439600                 |
| 34 | H                                            | -0.61509800 | -5.16721000 | -1.67849800                 |
| 35 | H                                            | 0.92181000  | -4.40291600 | -2.09427700                 |
| 36 | H                                            | -0.57124600 | -3.43758800 | -2.10379600                 |

|    |   |             |             |             |
|----|---|-------------|-------------|-------------|
| 1  | C | -1.04327000 | -3.50681600 | 0.65713500  |
| 2  | C | -1.03037900 | -2.48584800 | 1.61771000  |
| 3  | C | -2.21852600 | -4.25841700 | 0.50210300  |
| 4  | C | -2.16423200 | -2.22449200 | 2.39122200  |
| 5  | H | -0.14749500 | -1.87340500 | 1.76137200  |
| 6  | C | -3.34768000 | -4.00085600 | 1.28166300  |
| 7  | H | -2.25661300 | -5.06539700 | -0.22403600 |
| 8  | C | -3.32688400 | -2.97916900 | 2.23152400  |
| 9  | H | -2.12823500 | -1.42714200 | 3.12982400  |
| 10 | H | -4.24173100 | -4.60503000 | 1.14776900  |
| 11 | H | -4.20466800 | -2.77591300 | 2.83909300  |
| 12 | N | 2.43392500  | 0.16498100  | -1.45774000 |
| 13 | H | 2.26034700  | -0.17716000 | -2.39578600 |
| 14 | C | 3.15197300  | 1.34801400  | -1.39981000 |
| 15 | C | 3.27334900  | 2.13895500  | -2.56548400 |
| 16 | C | 3.75106600  | 1.82327500  | -0.21392900 |
| 17 | C | 3.94429300  | 3.35684100  | -2.53852600 |
| 18 | H | 2.83778400  | 1.77989300  | -3.49718600 |
| 19 | C | 4.41473700  | 3.05052000  | -0.20336800 |
| 20 | H | 3.71647600  | 1.21703700  | 0.68349500  |
| 21 | C | 4.51863100  | 3.83171600  | -1.35519200 |
| 22 | H | 4.02071400  | 3.93932500  | -3.45393700 |
| 23 | H | 4.87043000  | 3.38967100  | 0.72408100  |
| 24 | H | 5.04472800  | 4.78157700  | -1.33662900 |
| 25 | H | -0.17159600 | 0.51556600  | -0.34157300 |
| 26 | C | -1.09053200 | 4.73252800  | 0.23569500  |
| 27 | C | -0.63292900 | 3.58338300  | 0.88434300  |
| 28 | C | -0.81349000 | 3.41936600  | 2.26960100  |
| 29 | C | -1.46987500 | 4.40671900  | 3.00503400  |
| 30 | C | -1.94308800 | 5.54828900  | 2.35230500  |
| 31 | C | -1.75372400 | 5.71376500  | 0.97638800  |
| 32 | H | -0.91766800 | 4.87887400  | -0.82797000 |
| 33 | H | -1.60747900 | 4.29435000  | 4.07764900  |
| 34 | H | -2.45279300 | 6.32135200  | 2.92144900  |
| 35 | H | -2.11062500 | 6.61467000  | 0.48495000  |
| 36 | C | -0.21450500 | 2.11766400  | 2.74700900  |

|    |   |             |             |             |
|----|---|-------------|-------------|-------------|
| 1  | H | 0.32227500  | 2.21269500  | 3.69712800  |
| 2  | H | -0.98464000 | 1.34716900  | 2.89154000  |
| 3  | C | 0.13316700  | 2.41875100  | 0.31828400  |
| 4  | H | 0.92771200  | 2.70812200  | -0.37356300 |
| 5  | C | 0.72171700  | 1.68086500  | 1.58338300  |
| 6  | H | 1.70673300  | 2.15096900  | 1.74847300  |
| 7  | O | 0.80046400  | 0.31603700  | 1.42427400  |
| 8  | H | 1.66088500  | -0.12194600 | 0.67126100  |
| 9  | C | -2.11507900 | 1.11120700  | -0.00475000 |
| 10 | C | -0.75662500 | 1.68514500  | -1.95376100 |
| 11 | C | -3.00356600 | 1.22856800  | -1.26362300 |
| 12 | H | -2.39660600 | 1.81905100  | 0.77304100  |
| 13 | H | -2.10453900 | 0.10332200  | 0.41157200  |
| 14 | C | -2.00918800 | 0.95462600  | -2.41438500 |
| 15 | H | -0.84789200 | 2.76636500  | -2.08840100 |
| 16 | H | 0.17743300  | 1.33424200  | -2.39074300 |
| 17 | H | -3.32752900 | 2.27431500  | -1.34590200 |
| 18 | H | -1.80238700 | -0.11578700 | -2.50161400 |
| 19 | N | -0.69561300 | 1.40839200  | -0.47075000 |
| 20 | C | -4.23988400 | 0.35194200  | -1.25274900 |
| 21 | C | -5.50781200 | 0.92679000  | -1.40405000 |
| 22 | C | -4.14499600 | -1.04102400 | -1.11758000 |
| 23 | C | -6.65697100 | 0.13474200  | -1.42688300 |
| 24 | H | -5.59631900 | 2.00636800  | -1.50691500 |
| 25 | C | -5.29213700 | -1.83349400 | -1.13923600 |
| 26 | H | -3.17436800 | -1.51471300 | -0.99135200 |
| 27 | C | -6.55134900 | -1.24990800 | -1.29541300 |
| 28 | H | -7.63163000 | 0.60067000  | -1.54610400 |
| 29 | H | -5.19722000 | -2.90952200 | -1.02684800 |
| 30 | H | -7.44337700 | -1.87044600 | -1.31188400 |
| 31 | H | -2.37443000 | 1.32208300  | -3.37785000 |

32

33

**TS7***minor\_298K*

34 Zero-point correction= 0.765695 (Hartree/Particle)

35 Thermal correction to Energy= 0.807157

36 Thermal correction to Enthalpy= 0.808101

|   |                                              |              |
|---|----------------------------------------------|--------------|
| 1 | Thermal correction to Gibbs Free Energy=     | 0.685179     |
| 2 | Sum of electronic and zero-point Energies=   | -1961.338569 |
| 3 | Sum of electronic and thermal Energies=      | -1961.297108 |
| 4 | Sum of electronic and thermal Enthalpies=    | -1961.296164 |
| 5 | Sum of electronic and thermal Free Energies= | -1961.419086 |

6 Cartesian Coordinates

| 7  | Atom  | X          | Y           | Z           |
|----|-------|------------|-------------|-------------|
| 8  | ----- |            |             |             |
| 9  | C     | 1.62165700 | -1.10109500 | 0.45583300  |
| 10 | C     | 2.50979900 | -1.84518100 | 1.41389700  |
| 11 | C     | 2.98557900 | -1.23932400 | 2.59281300  |
| 12 | C     | 2.84970300 | -3.19237300 | 1.19677600  |
| 13 | C     | 3.78849900 | -1.93766300 | 3.49230100  |
| 14 | H     | 2.72060100 | -0.20811500 | 2.80210500  |
| 15 | C     | 3.64685300 | -3.89465700 | 2.10172600  |
| 16 | H     | 2.48054500 | -3.68983900 | 0.30551600  |
| 17 | C     | 4.12627400 | -3.27241800 | 3.25460300  |
| 18 | H     | 4.14221300 | -1.43891600 | 4.39208300  |
| 19 | H     | 3.89357000 | -4.93497600 | 1.90109200  |
| 20 | H     | 4.74455100 | -3.81951700 | 3.96178200  |
| 21 | C     | 2.14194300 | 0.06676000  | -0.24801700 |
| 22 | O     | 1.71681100 | 0.46665500  | -1.34076800 |
| 23 | O     | 3.11267900 | 0.74194600  | 0.44280600  |
| 24 | C     | 3.93636400 | 1.74895800  | -0.21909400 |
| 25 | C     | 3.09460900 | 2.97474000  | -0.60146500 |
| 26 | H     | 2.48154700 | 3.26610800  | 0.25841300  |
| 27 | H     | 3.74108800 | 3.82484300  | -0.84514700 |
| 28 | H     | 2.44259100 | 2.76023700  | -1.44804000 |
| 29 | C     | 4.93783300 | 2.13718300  | 0.88284000  |
| 30 | H     | 5.65599500 | 2.86836900  | 0.49811500  |
| 31 | H     | 4.41059500 | 2.57561300  | 1.73744300  |
| 32 | H     | 5.48698600 | 1.25731000  | 1.22840900  |
| 33 | C     | 4.69617500 | 1.11726500  | -1.39106500 |
| 34 | C     | 5.19212700 | -0.18959000 | -1.26720600 |
| 35 | C     | 4.98532800 | 1.82998100  | -2.56035800 |
| 36 | C     | 5.94477700 | -0.76785100 | -2.28797100 |

|    |   |             |             |             |
|----|---|-------------|-------------|-------------|
| 1  | H | 4.97409200  | -0.76109200 | -0.36970100 |
| 2  | C | 5.74463900  | 1.25369700  | -3.58149400 |
| 3  | H | 4.61528000  | 2.84211700  | -2.68898300 |
| 4  | C | 6.22677000  | -0.04778900 | -3.45082900 |
| 5  | H | 6.31190500  | -1.78453600 | -2.17283900 |
| 6  | H | 5.95344100  | 1.82571800  | -4.48219600 |
| 7  | H | 6.81476900  | -0.49784000 | -4.24650200 |
| 8  | N | 0.89450100  | -1.92106200 | -0.49322000 |
| 9  | H | 1.16031100  | -1.80154400 | -1.46266900 |
| 10 | H | -1.25448200 | 0.05389700  | 0.22524700  |
| 11 | C | -0.18763100 | -2.73698300 | -0.25693500 |
| 12 | C | -0.79664600 | -3.40784700 | -1.34687800 |
| 13 | C | -0.72030700 | -2.96046700 | 1.03372100  |
| 14 | C | -1.88627500 | -4.25088500 | -1.15406200 |
| 15 | H | -0.38678500 | -3.27014300 | -2.34640400 |
| 16 | C | -1.81502600 | -3.80545400 | 1.20588100  |
| 17 | H | -0.27193400 | -2.47476500 | 1.89132100  |
| 18 | C | -2.41403700 | -4.45981800 | 0.12511500  |
| 19 | H | -2.32304100 | -4.75507100 | -2.01338800 |
| 20 | H | -2.19799800 | -3.96159000 | 2.21206600  |
| 21 | H | -3.25462500 | -5.13110400 | 0.27636400  |
| 22 | C | -2.02738400 | 4.27512500  | -0.24357900 |
| 23 | C | -1.60031100 | 3.25745600  | 0.61228500  |
| 24 | C | -1.78364100 | 3.35954700  | 2.00219600  |
| 25 | C | -2.40714000 | 4.48671400  | 2.53801900  |
| 26 | C | -2.84567100 | 5.49959500  | 1.68082000  |
| 27 | C | -2.65751900 | 5.39752400  | 0.29819000  |
| 28 | H | -1.86039600 | 4.20700200  | -1.31610100 |
| 29 | H | -2.54707600 | 4.58117600  | 3.61194900  |
| 30 | H | -3.32963000 | 6.38095500  | 2.09325300  |
| 31 | H | -2.99096900 | 6.19956600  | -0.35436000 |
| 32 | C | -1.23253200 | 2.14897900  | 2.71987400  |
| 33 | H | -0.67918500 | 2.40340300  | 3.63023700  |
| 34 | H | -2.03258700 | 1.45758200  | 3.01752200  |
| 35 | C | -0.87188400 | 1.98920700  | 0.27298000  |
| 36 | H | -0.06069700 | 2.11260100  | -0.44682900 |

|    |                                            |             |                             |              |
|----|--------------------------------------------|-------------|-----------------------------|--------------|
| 1  | C                                          | -0.33615200 | 1.45148700                  | 1.66227900   |
| 2  | H                                          | 0.69699500  | 1.81519300                  | 1.76189000   |
| 3  | O                                          | -0.39909700 | 0.06244500                  | 1.71783600   |
| 4  | H                                          | 0.55738000  | -0.41547800                 | 1.24598100   |
| 5  | C                                          | -3.18751000 | 0.76509400                  | 0.04038700   |
| 6  | C                                          | -1.57454700 | 0.65229700                  | -1.79255800  |
| 7  | C                                          | -3.90825300 | 0.41570900                  | -1.28444900  |
| 8  | H                                          | -3.52058500 | 1.71179200                  | 0.46418700   |
| 9  | H                                          | -3.29296100 | -0.01909300                 | 0.79247600   |
| 10 | C                                          | -2.78340600 | -0.20362300                 | -2.14746700  |
| 11 | H                                          | -1.63401500 | 1.63991500                  | -2.26146500  |
| 12 | H                                          | -0.58863300 | 0.22477900                  | -1.98458200  |
| 13 | H                                          | -4.20477500 | 1.36044300                  | -1.75796900  |
| 14 | H                                          | -2.60468500 | -1.24943600                 | -1.87476000  |
| 15 | H                                          | -3.01472900 | -0.16759200                 | -3.21594400  |
| 16 | N                                          | -1.71002700 | 0.85093000                  | -0.30298400  |
| 17 | C                                          | -5.15437300 | -0.43006200                 | -1.10468000  |
| 18 | C                                          | -6.40362400 | 0.07213600                  | -1.48891900  |
| 19 | C                                          | -5.08834300 | -1.72026100                 | -0.55687300  |
| 20 | C                                          | -7.56261600 | -0.69063600                 | -1.33396300  |
| 21 | H                                          | -6.47052100 | 1.07108000                  | -1.91505000  |
| 22 | C                                          | -6.24519600 | -2.48317300                 | -0.40153300  |
| 23 | H                                          | -4.13427600 | -2.14523300                 | -0.25348300  |
| 24 | C                                          | -7.48613300 | -1.97205400                 | -0.78857000  |
| 25 | H                                          | -8.52230800 | -0.28211300                 | -1.63925100  |
| 26 | H                                          | -6.17290600 | -3.48146200                 | 0.02149300   |
| 27 | H                                          | -8.38573100 | -2.56918500                 | -0.66626900  |
| 28 |                                            |             |                             |              |
| 29 |                                            |             | <b>TS11<sub>298K</sub></b>  |              |
| 30 | Zero-point correction=                     |             | 0.880552 (Hartree/Particle) |              |
| 31 | Thermal correction to Energy=              |             |                             | 0.932335     |
| 32 | Thermal correction to Enthalpy=            |             |                             | 0.933279     |
| 33 | Thermal correction to Gibbs Free Energy=   |             |                             | 0.782722     |
| 34 | Sum of electronic and zero-point Energies= |             |                             | -2245.040665 |
| 35 | Sum of electronic and thermal Energies=    |             |                             | -2244.988883 |
| 36 | Sum of electronic and thermal Enthalpies=  |             |                             | -2244.987939 |

|    |                                              |                       |             |              |
|----|----------------------------------------------|-----------------------|-------------|--------------|
| 1  | Sum of electronic and thermal Free Energies= |                       |             | -2245.138496 |
| 2  |                                              | Cartesian Coordinates |             |              |
| 3  | Atom                                         | X                     | Y           | Z            |
| 4  | -----                                        |                       |             |              |
| 5  | C                                            | -2.09364000           | 0.72313600  | -0.83658700  |
| 6  | C                                            | -3.06447700           | 1.86468600  | -0.87604600  |
| 7  | C                                            | -3.76397300           | 2.34808500  | 0.25463200   |
| 8  | C                                            | -3.26984500           | 2.56100700  | -2.08717400  |
| 9  | C                                            | -4.62677000           | 3.44304000  | 0.16696400   |
| 10 | H                                            | -3.64692100           | 1.85242600  | 1.20989100   |
| 11 | C                                            | -4.12722500           | 3.65622300  | -2.16819800  |
| 12 | H                                            | -2.75389200           | 2.22003300  | -2.97699300  |
| 13 | C                                            | -4.81665500           | 4.11100500  | -1.04283000  |
| 14 | H                                            | -5.15318500           | 3.77336700  | 1.06011300   |
| 15 | H                                            | -4.25861200           | 4.15564800  | -3.12550600  |
| 16 | H                                            | -5.48537700           | 4.96509700  | -1.10689600  |
| 17 | C                                            | -2.39720900           | -0.50735800 | -0.12733500  |
| 18 | O                                            | -2.05525000           | -1.63831600 | -0.49904200  |
| 19 | O                                            | -3.03859800           | -0.31222900 | 1.07695800   |
| 20 | N                                            | -1.46971200           | 0.40096600  | -2.10196800  |
| 21 | H                                            | -1.65848100           | -0.54644200 | -2.40836800  |
| 22 | H                                            | 0.10930700            | -3.88524100 | 1.08520900   |
| 23 | C                                            | -0.31815900           | 0.96045100  | -2.61456100  |
| 24 | C                                            | 0.34903900            | 0.31981100  | -3.68633400  |
| 25 | C                                            | 0.20761900            | 2.18604200  | -2.15327000  |
| 26 | C                                            | 1.49484300            | 0.86993000  | -4.24971500  |
| 27 | H                                            | -0.05643500           | -0.61102200 | -4.07879500  |
| 28 | C                                            | 1.36158800            | 2.72288100  | -2.72403000  |
| 29 | H                                            | -0.30565200           | 2.72980400  | -1.36924000  |
| 30 | C                                            | 2.02435300            | 2.07528700  | -3.77061800  |
| 31 | H                                            | 1.98203000            | 0.35177400  | -5.07255900  |
| 32 | H                                            | 1.73806300            | 3.67115000  | -2.34698000  |
| 33 | H                                            | 2.91641600            | 2.50525000  | -4.21614800  |
| 34 | H                                            | -0.55447100           | -2.75168000 | 0.03404100   |
| 35 | H                                            | 0.38654700            | 0.73603700  | 1.32215900   |
| 36 | H                                            | -1.00413400           | 1.24142600  | 0.31271700   |

|    |   |             |             |             |
|----|---|-------------|-------------|-------------|
| 1  | C | -3.75790200 | -1.40896600 | 1.73425700  |
| 2  | N | 0.30658700  | -3.18115800 | 0.38228000  |
| 3  | C | 1.19504700  | -3.61057300 | -0.61711200 |
| 4  | C | 2.17117000  | -4.58416600 | -0.35003000 |
| 5  | C | 3.09587300  | -4.94443000 | -1.32920200 |
| 6  | C | 3.07108900  | -4.34432900 | -2.59069800 |
| 7  | C | 2.09780500  | -3.37785800 | -2.86070400 |
| 8  | C | 1.16728700  | -3.01107900 | -1.88845000 |
| 9  | H | 2.20724500  | -5.05132400 | 0.63190600  |
| 10 | H | 3.84119500  | -5.70257900 | -1.10218500 |
| 11 | H | 3.79134700  | -4.62954200 | -3.35168400 |
| 12 | H | 2.05534600  | -2.90534900 | -3.83904700 |
| 13 | H | 0.41088400  | -2.26079200 | -2.10018200 |
| 14 | N | -0.38641300 | 1.46382200  | 1.29349900  |
| 15 | C | -4.45914900 | -0.69798100 | 2.90485400  |
| 16 | H | -5.05926200 | -1.41573800 | 3.47269900  |
| 17 | H | -3.72053600 | -0.24994000 | 3.57995000  |
| 18 | H | -5.12239200 | 0.08952700  | 2.53716700  |
| 19 | C | -2.76657600 | -2.44157900 | 2.28812600  |
| 20 | H | -2.35933600 | -3.06779100 | 1.49523500  |
| 21 | H | -1.94433400 | -1.91655100 | 2.78611900  |
| 22 | H | -3.25331300 | -3.07862700 | 3.03433000  |
| 23 | C | -4.81386600 | -1.99505500 | 0.79180800  |
| 24 | C | -5.11809200 | -3.36135400 | 0.78068000  |
| 25 | C | -5.56004100 | -1.13858100 | -0.03181900 |
| 26 | C | -6.13574700 | -3.86168200 | -0.03463700 |
| 27 | H | -4.56121300 | -4.05193800 | 1.40571800  |
| 28 | C | -6.57082000 | -1.63819000 | -0.85135400 |
| 29 | H | -5.34020500 | -0.07504300 | -0.04235200 |
| 30 | C | -6.86504900 | -3.00307200 | -0.85566600 |
| 31 | H | -6.35156900 | -4.92703200 | -0.02902700 |
| 32 | H | -7.12853900 | -0.95705100 | -1.48872600 |
| 33 | H | -7.65346900 | -3.39265800 | -1.49415300 |
| 34 | H | 1.14417600  | -1.45085200 | 1.15168200  |
| 35 | H | 2.26541100  | -0.38969600 | 0.53440400  |
| 36 | N | 1.66250400  | -0.58294300 | 1.34700400  |

|    |   |             |             |             |
|----|---|-------------|-------------|-------------|
| 1  | C | 2.38600500  | -0.65538500 | 2.56252700  |
| 2  | C | 1.82009700  | -1.28566800 | 3.68297700  |
| 3  | C | 2.49864200  | -1.30878300 | 4.89978700  |
| 4  | C | 3.74935700  | -0.69971400 | 5.02797200  |
| 5  | C | 4.31628600  | -0.07458900 | 3.91630700  |
| 6  | C | 3.64765400  | -0.05234700 | 2.69185800  |
| 7  | H | 0.84526400  | -1.76026500 | 3.59049800  |
| 8  | H | 2.04543600  | -1.80602400 | 5.75396400  |
| 9  | H | 4.27520100  | -0.71756300 | 5.97820700  |
| 10 | H | 5.29476100  | 0.39255000  | 3.99415700  |
| 11 | H | 4.11226400  | 0.41119700  | 1.82487100  |
| 12 | H | 3.04672700  | -1.12811100 | -1.64789800 |
| 13 | H | 2.82578600  | 0.50838800  | -1.82204700 |
| 14 | N | 3.28792600  | -0.21377200 | -1.27327900 |
| 15 | C | 4.67406100  | -0.01028800 | -1.12744900 |
| 16 | C | 5.53982700  | -1.09721800 | -0.92188000 |
| 17 | C | 6.90069200  | -0.88206200 | -0.71370300 |
| 18 | C | 7.42692000  | 0.41193000  | -0.70434200 |
| 19 | C | 6.56789300  | 1.49372400  | -0.90818600 |
| 20 | C | 5.20434700  | 1.29062400  | -1.11665800 |
| 21 | H | 5.13787200  | -2.10794600 | -0.92896100 |
| 22 | H | 7.55534600  | -1.73634900 | -0.55986800 |
| 23 | H | 8.48884300  | 0.57397600  | -0.54365100 |
| 24 | H | 6.96032000  | 2.50778200  | -0.90971500 |
| 25 | H | 4.54090100  | 2.13663200  | -1.28097600 |
| 26 | C | 0.13311200  | 2.81764600  | 1.46045000  |
| 27 | C | -0.72484700 | 3.90918100  | 1.30882000  |
| 28 | C | 1.48457800  | 3.00614200  | 1.75440400  |
| 29 | C | -0.21895300 | 5.20059600  | 1.45924200  |
| 30 | H | -1.77145200 | 3.75144800  | 1.06501900  |
| 31 | C | 1.97913200  | 4.30347700  | 1.89742300  |
| 32 | H | 2.14116100  | 2.15292800  | 1.88932300  |
| 33 | C | 1.13148500  | 5.40227800  | 1.75114300  |
| 34 | H | -0.88566300 | 6.04976700  | 1.33956200  |
| 35 | H | 3.03006300  | 4.44963200  | 2.13023500  |
| 36 | H | 1.52066500  | 6.41026400  | 1.86334800  |

|    |                                              |                            |                             |              |
|----|----------------------------------------------|----------------------------|-----------------------------|--------------|
| 1  | H                                            | -1.05642200                | 1.22375700                  | 2.02949600   |
| 2  |                                              |                            |                             |              |
| 3  |                                              | <b>TS10<sub>298K</sub></b> |                             |              |
| 4  | Zero-point correction=                       |                            | 0.761558 (Hartree/Particle) |              |
| 5  | Thermal correction to Energy=                |                            |                             | 0.805772     |
| 6  | Thermal correction to Enthalpy=              |                            |                             | 0.806716     |
| 7  | Thermal correction to Gibbs Free Energy=     |                            |                             | 0.676050     |
| 8  | Sum of electronic and zero-point Energies=   |                            |                             | -1957.548122 |
| 9  | Sum of electronic and thermal Energies=      |                            |                             | -1957.503908 |
| 10 | Sum of electronic and thermal Enthalpies=    |                            |                             | -1957.502964 |
| 11 | Sum of electronic and thermal Free Energies= |                            |                             | -1957.633630 |
| 12 |                                              | Cartesian Coordinates      |                             |              |
| 13 | Atom                                         | X                          | Y                           | Z            |
| 14 | -----                                        |                            |                             |              |
| 15 | C                                            | 1.82091000                 | -0.75888200                 | 1.17630900   |
| 16 | C                                            | 3.30564300                 | -0.75589900                 | 1.35189700   |
| 17 | C                                            | 4.20514000                 | -1.11572400                 | 0.32396800   |
| 18 | C                                            | 3.87157600                 | -0.32239700                 | 2.56799200   |
| 19 | C                                            | 5.58551200                 | -1.05535400                 | 0.51057900   |
| 20 | H                                            | 3.81880400                 | -1.47121200                 | -0.62382800  |
| 21 | C                                            | 5.25262700                 | -0.26078700                 | 2.75061500   |
| 22 | H                                            | 3.20922400                 | -0.04211600                 | 3.37940800   |
| 23 | C                                            | 6.12468100                 | -0.62567700                 | 1.72458900   |
| 24 | H                                            | 6.24436000                 | -1.34937400                 | -0.30383400  |
| 25 | H                                            | 5.64708900                 | 0.07333700                  | 3.70764600   |
| 26 | H                                            | 7.20101400                 | -0.57610100                 | 1.86638800   |
| 27 | C                                            | 1.11701000                 | -1.88327300                 | 0.59487900   |
| 28 | O                                            | -0.09177500                | -2.11008600                 | 0.78149700   |
| 29 | O                                            | 1.86155500                 | -2.65799200                 | -0.25447500  |
| 30 | N                                            | 1.04997700                 | -0.23735800                 | 2.29296100   |
| 31 | H                                            | 0.30491400                 | -0.86684500                 | 2.56819800   |
| 32 | H                                            | -3.06152500                | -1.51514900                 | -0.99270400  |
| 33 | C                                            | 0.76488300                 | 1.09586100                  | 2.52486000   |
| 34 | C                                            | -0.35094000                | 1.43709100                  | 3.32667900   |
| 35 | C                                            | 1.56780600                 | 2.14700400                  | 2.03112500   |
| 36 | C                                            | -0.64849700                | 2.76698500                  | 3.61195800   |

|    |   |             |             |             |
|----|---|-------------|-------------|-------------|
| 1  | H | -0.97770200 | 0.64225300  | 3.72719700  |
| 2  | C | 1.25096600  | 3.47375900  | 2.31894800  |
| 3  | H | 2.44773900  | 1.91767300  | 1.44103200  |
| 4  | C | 0.14513400  | 3.80354200  | 3.10687900  |
| 5  | H | -1.51197300 | 2.99416500  | 4.23286800  |
| 6  | H | 1.88828600  | 4.26098200  | 1.92313500  |
| 7  | H | -0.08420500 | 4.83976600  | 3.33753400  |
| 8  | H | -1.87215300 | -1.64810600 | 0.16564600  |
| 9  | H | -0.08220300 | 1.18268400  | -0.54062100 |
| 10 | H | 1.36913000  | 0.21672300  | -0.06477900 |
| 11 | C | 1.24403400  | -3.76816800 | -0.97710600 |
| 12 | N | -2.80445000 | -1.28014100 | -0.03850700 |
| 13 | C | -3.77542500 | -1.66904800 | 0.90860500  |
| 14 | C | -5.14298500 | -1.62405100 | 0.59555400  |
| 15 | C | -6.09791300 | -1.95526800 | 1.55520100  |
| 16 | C | -5.71185200 | -2.33204100 | 2.84325900  |
| 17 | C | -4.35157200 | -2.37806900 | 3.15668200  |
| 18 | C | -3.38850900 | -2.05381400 | 2.20277900  |
| 19 | H | -5.45399600 | -1.32030100 | -0.40210300 |
| 20 | H | -7.15220800 | -1.91579500 | 1.29240200  |
| 21 | H | -6.45863700 | -2.58795400 | 3.58931800  |
| 22 | H | -4.03303500 | -2.67731800 | 4.15231200  |
| 23 | H | -2.32971000 | -2.10971900 | 2.44186400  |
| 24 | N | 0.82983300  | 0.82304900  | -0.93589300 |
| 25 | C | 0.69971200  | -4.81630600 | 0.00228200  |
| 26 | H | 0.44073000  | -5.73706100 | -0.53185600 |
| 27 | H | 1.48527300  | -5.05924600 | 0.72451000  |
| 28 | H | -0.17062000 | -4.45243300 | 0.54667600  |
| 29 | C | 2.42915400  | -4.37493900 | -1.74842800 |
| 30 | H | 2.88803300  | -3.64030600 | -2.41613200 |
| 31 | H | 3.19125900  | -4.72319600 | -1.04443600 |
| 32 | H | 2.08979900  | -5.22263100 | -2.35223000 |
| 33 | C | 0.21153500  | -3.22059600 | -1.97119500 |
| 34 | C | -1.06311900 | -3.77486000 | -2.12486600 |
| 35 | C | 0.57154100  | -2.15183200 | -2.81141300 |
| 36 | C | -1.95659300 | -3.27170800 | -3.07674800 |

|    |                        |             |                           |                             |
|----|------------------------|-------------|---------------------------|-----------------------------|
| 1  | H                      | -1.37511300 | -4.60180400               | -1.49633100                 |
| 2  | C                      | -0.31874200 | -1.64126300               | -3.75670100                 |
| 3  | H                      | 1.56977000  | -1.72804700               | -2.73181600                 |
| 4  | C                      | -1.59332600 | -2.19983700               | -3.89173400                 |
| 5  | H                      | -2.93890500 | -3.72618600               | -3.17939300                 |
| 6  | H                      | -0.01258600 | -0.81965000               | -4.39975800                 |
| 7  | H                      | -2.28651600 | -1.81178500               | -4.63299500                 |
| 8  | H                      | -2.23562500 | 0.68903500                | 0.09140300                  |
| 9  | H                      | -1.54070600 | 1.83170500                | 1.09920200                  |
| 10 | N                      | -1.76374000 | 1.60453900                | 0.13036500                  |
| 11 | C                      | -2.47339700 | 2.63324700                | -0.53044000                 |
| 12 | C                      | -3.29213000 | 2.33526300                | -1.63178400                 |
| 13 | C                      | -3.94468700 | 3.35576000                | -2.32156000                 |
| 14 | C                      | -3.79254300 | 4.68847400                | -1.93296100                 |
| 15 | C                      | -2.97593900 | 4.98744800                | -0.84018500                 |
| 16 | C                      | -2.31863000 | 3.97441500                | -0.14273100                 |
| 17 | H                      | -3.41817600 | 1.29896500                | -1.93545100                 |
| 18 | H                      | -4.58017400 | 3.10477700                | -3.16729300                 |
| 19 | H                      | -4.30445000 | 5.48082200                | -2.47137900                 |
| 20 | H                      | -2.84984100 | 6.01920500                | -0.52145500                 |
| 21 | H                      | -1.68464000 | 4.21165000                | 0.70863500                  |
| 22 | C                      | 1.62133400  | 1.88558600                | -1.54894400                 |
| 23 | C                      | 1.00229700  | 3.07283600                | -1.94366000                 |
| 24 | C                      | 2.99324200  | 1.70017300                | -1.72804900                 |
| 25 | C                      | 1.76805100  | 4.07924700                | -2.53399600                 |
| 26 | H                      | -0.06335700 | 3.21354900                | -1.79075900                 |
| 27 | C                      | 3.74795300  | 2.71267700                | -2.32212900                 |
| 28 | H                      | 3.47269000  | 0.78867300                | -1.38373700                 |
| 29 | C                      | 3.13879800  | 3.90112700                | -2.72834500                 |
| 30 | H                      | 1.28700600  | 5.00374100                | -2.84044000                 |
| 31 | H                      | 4.81660700  | 2.57170300                | -2.45624500                 |
| 32 | H                      | 3.73110300  | 4.68787500                | -3.18700600                 |
| 33 | H                      | 0.57921000  | 0.10283300                | -1.62343100                 |
| 34 |                        |             |                           |                             |
| 35 |                        |             | <b>TS9<sub>298K</sub></b> |                             |
| 36 | Zero-point correction= |             |                           | 0.643668 (Hartree/Particle) |

|    |                                              |             |             |              |
|----|----------------------------------------------|-------------|-------------|--------------|
| 1  | Thermal correction to Energy=                |             |             | 0.680243     |
| 2  | Thermal correction to Enthalpy=              |             |             | 0.681187     |
| 3  | Thermal correction to Gibbs Free Energy=     |             |             | 0.569163     |
| 4  | Sum of electronic and zero-point Energies=   |             |             | -1670.045102 |
| 5  | Sum of electronic and thermal Energies=      |             |             | -1670.008528 |
| 6  | Sum of electronic and thermal Enthalpies=    |             |             | -1670.007583 |
| 7  | Sum of electronic and thermal Free Energies= |             |             | -1670.119608 |
| 8  | Cartesian Coordinates                        |             |             |              |
| 9  | Atom                                         | X           | Y           | Z            |
| 10 | -----                                        |             |             |              |
| 11 | C                                            | -0.88927900 | -0.92276300 | 0.74542000   |
| 12 | C                                            | -1.47950800 | -2.23730900 | 0.38606000   |
| 13 | C                                            | -1.94196700 | -2.57039000 | -0.91054500  |
| 14 | C                                            | -1.53017600 | -3.26361100 | 1.35651800   |
| 15 | C                                            | -2.43624900 | -3.84287700 | -1.20212800  |
| 16 | H                                            | -1.93287800 | -1.81981400 | -1.69076000  |
| 17 | C                                            | -2.02219100 | -4.53182200 | 1.05745700   |
| 18 | H                                            | -1.18556600 | -3.04082700 | 2.36026000   |
| 19 | C                                            | -2.48097600 | -4.83834100 | -0.22527800  |
| 20 | H                                            | -2.79133600 | -4.05288800 | -2.20914800  |
| 21 | H                                            | -2.04962800 | -5.28717800 | 1.83985600   |
| 22 | H                                            | -2.86377100 | -5.82840200 | -0.45785700  |
| 23 | C                                            | -1.34322500 | 0.35294200  | 0.26102300   |
| 24 | O                                            | -1.15428200 | 1.43573100  | 0.84308800   |
| 25 | O                                            | -1.90461800 | 0.32044400  | -1.00738700  |
| 26 | N                                            | -0.37878600 | -0.78971500 | 2.09797900   |
| 27 | H                                            | -0.76942600 | 0.02825200  | 2.55489700   |
| 28 | H                                            | 0.84240500  | 1.95161700  | 0.71311500   |
| 29 | C                                            | 0.95252300  | -0.99998000 | 2.43562800   |
| 30 | C                                            | 1.53962900  | -0.25607100 | 3.48424500   |
| 31 | C                                            | 1.74940900  | -1.96625500 | 1.78602200   |
| 32 | C                                            | 2.86797400  | -0.46151100 | 3.85163200   |
| 33 | H                                            | 0.93857500  | 0.48543700  | 4.00735600   |
| 34 | C                                            | 3.07927300  | -2.15565300 | 2.15957100   |
| 35 | H                                            | 1.31088300  | -2.58414900 | 1.00979300   |
| 36 | C                                            | 3.65621500  | -1.40707600 | 3.18814000   |

|    |   |             |             |             |
|----|---|-------------|-------------|-------------|
| 1  | H | 3.29069000  | 0.12906800  | 4.66119200  |
| 2  | H | 3.66844100  | -2.90719000 | 1.63928000  |
| 3  | H | 4.69148500  | -1.56476200 | 3.47608900  |
| 4  | H | 2.15733900  | 1.20485200  | 1.38142300  |
| 5  | H | 1.57117700  | 0.39588600  | -0.69222800 |
| 6  | H | 0.42593000  | -0.81717800 | -0.40272400 |
| 7  | C | -2.75264800 | 1.42565200  | -1.46203300 |
| 8  | N | 1.82823200  | 1.71327700  | 0.56086500  |
| 9  | C | 2.66067300  | 2.80297800  | 0.20933500  |
| 10 | C | 2.13967400  | 3.90434800  | -0.48535800 |
| 11 | C | 2.98084600  | 4.94000800  | -0.88927400 |
| 12 | C | 4.34877500  | 4.89695800  | -0.61110500 |
| 13 | C | 4.86759600  | 3.80196500  | 0.08259100  |
| 14 | C | 4.03472400  | 2.76080500  | 0.49079900  |
| 15 | H | 1.07460300  | 3.94592100  | -0.70106500 |
| 16 | H | 2.56047400  | 5.78921200  | -1.42196600 |
| 17 | H | 4.99971000  | 5.70735700  | -0.92584900 |
| 18 | H | 5.92868900  | 3.75671700  | 0.31424400  |
| 19 | H | 4.44150000  | 1.91353500  | 1.03916400  |
| 20 | N | 1.13575800  | -0.42831800 | -1.19581600 |
| 21 | C | -3.31582600 | 0.89894600  | -2.79346600 |
| 22 | H | -3.99250100 | 1.63859400  | -3.23295100 |
| 23 | H | -2.50319600 | 0.70502500  | -3.50351300 |
| 24 | H | -3.87312600 | -0.02872800 | -2.63795900 |
| 25 | C | -1.90260300 | 2.67626400  | -1.72684300 |
| 26 | H | -1.54804000 | 3.11651800  | -0.79524100 |
| 27 | H | -1.03813200 | 2.39728800  | -2.34049900 |
| 28 | H | -2.47497100 | 3.42019500  | -2.29127500 |
| 29 | C | -3.90515700 | 1.64295700  | -0.47650500 |
| 30 | C | -4.39621700 | 2.91799400  | -0.17381200 |
| 31 | C | -4.54440900 | 0.52967100  | 0.09036800  |
| 32 | C | -5.49441700 | 3.07919200  | 0.67403700  |
| 33 | H | -3.92212800 | 3.80044500  | -0.59086100 |
| 34 | C | -5.63612400 | 0.68977900  | 0.94193600  |
| 35 | H | -4.17471600 | -0.46861000 | -0.12549400 |
| 36 | C | -6.11842000 | 1.96668100  | 1.23640700  |

|    |   |             |             |             |
|----|---|-------------|-------------|-------------|
| 1  | H | -5.85582600 | 4.07967200  | 0.89793200  |
| 2  | H | -6.10941700 | -0.18667900 | 1.37690900  |
| 3  | H | -6.96999700 | 2.09223100  | 1.89990200  |
| 4  | C | 2.10809500  | -1.36689700 | -1.74011600 |
| 5  | C | 3.45375700  | -1.00574500 | -1.79638700 |
| 6  | C | 1.67412000  | -2.61800900 | -2.18021300 |
| 7  | C | 4.37985100  | -1.91371700 | -2.31179500 |
| 8  | H | 3.77352100  | -0.02863200 | -1.44432300 |
| 9  | C | 2.60932900  | -3.51470000 | -2.69718200 |
| 10 | H | 0.62424900  | -2.88968700 | -2.10255600 |
| 11 | C | 3.96006600  | -3.16555400 | -2.76487500 |
| 12 | H | 5.42943900  | -1.63846600 | -2.35919100 |
| 13 | H | 2.27953500  | -4.49122100 | -3.03946400 |
| 14 | H | 4.68402500  | -3.86949100 | -3.16503900 |
| 15 | H | 0.49793700  | -0.06318200 | -1.90989300 |

16

17

**TS8<sub>298K</sub>**

|    |                                              |  |                             |              |
|----|----------------------------------------------|--|-----------------------------|--------------|
| 18 | Zero-point correction=                       |  | 0.523803 (Hartree/Particle) |              |
| 19 | Thermal correction to Energy=                |  |                             | 0.553185     |
| 20 | Thermal correction to Enthalpy=              |  |                             | 0.554129     |
| 21 | Thermal correction to Gibbs Free Energy=     |  |                             | 0.461008     |
| 22 | Sum of electronic and zero-point Energies=   |  |                             | -1382.542753 |
| 23 | Sum of electronic and thermal Energies=      |  |                             | -1382.513372 |
| 24 | Sum of electronic and thermal Enthalpies=    |  |                             | -1382.512427 |
| 25 | Sum of electronic and thermal Free Energies= |  |                             | -1382.605548 |

26

Cartesian Coordinates

| 27 | Atom  | X           | Y           | Z           |
|----|-------|-------------|-------------|-------------|
| 28 | ----- |             |             |             |
| 29 | C     | -1.06245100 | -1.00376400 | -0.33874900 |
| 30 | C     | -1.51821900 | -1.93998200 | 0.72259300  |
| 31 | C     | -0.80432700 | -2.08228800 | 1.92928900  |
| 32 | C     | -2.70880100 | -2.67748800 | 0.58558800  |
| 33 | C     | -1.24179900 | -2.94162300 | 2.93314500  |
| 34 | H     | 0.10378300  | -1.50487700 | 2.07610600  |
| 35 | C     | -3.15278600 | -3.53084600 | 1.59619300  |
| 36 | H     | -3.28397600 | -2.57889900 | -0.32972600 |

|    |   |             |             |             |
|----|---|-------------|-------------|-------------|
| 1  | C | -2.42203200 | -3.67417500 | 2.77579300  |
| 2  | H | -0.66409400 | -3.03126400 | 3.85048600  |
| 3  | H | -4.07581300 | -4.08901500 | 1.45612500  |
| 4  | H | -2.76877300 | -4.33734000 | 3.56401600  |
| 5  | C | 0.25809600  | -1.07328800 | -0.91219100 |
| 6  | O | 0.63624500  | -0.33900900 | -1.85752900 |
| 7  | O | 1.08947000  | -1.98827300 | -0.33821900 |
| 8  | C | 2.45054100  | -2.19340500 | -0.83070200 |
| 9  | C | 2.92188700  | -3.40244400 | -0.00271100 |
| 10 | H | 2.28673600  | -4.26854700 | -0.21357600 |
| 11 | H | 3.95778200  | -3.65020700 | -0.25566400 |
| 12 | H | 2.86819800  | -3.19191300 | 1.06859100  |
| 13 | C | 2.43231800  | -2.58673600 | -2.31412000 |
| 14 | H | 3.41676200  | -2.95864600 | -2.61842900 |
| 15 | H | 1.71205500  | -3.39955200 | -2.45161400 |
| 16 | H | 2.14188900  | -1.75339000 | -2.95260700 |
| 17 | C | 3.32821100  | -0.98051200 | -0.50153800 |
| 18 | C | 4.19246000  | -0.39756600 | -1.43630200 |
| 19 | C | 3.33474100  | -0.47692100 | 0.80892600  |
| 20 | C | 5.04671200  | 0.64640900  | -1.07176900 |
| 21 | H | 4.20605600  | -0.75492600 | -2.46017200 |
| 22 | C | 4.18865300  | 0.56147600  | 1.17798000  |
| 23 | H | 2.66396000  | -0.90576700 | 1.54778500  |
| 24 | C | 5.05452800  | 1.12635900  | 0.23801600  |
| 25 | H | 5.71053200  | 1.07971700  | -1.81560000 |
| 26 | H | 4.17841900  | 0.92802000  | 2.20124500  |
| 27 | H | 5.73020900  | 1.92820900  | 0.52487600  |
| 28 | N | -2.03615500 | -0.62686600 | -1.34135200 |
| 29 | H | -1.74379800 | -0.76689100 | -2.30062200 |
| 30 | H | -0.01621600 | 1.32789200  | -1.32034900 |
| 31 | C | -3.11136100 | 0.22491900  | -1.17374100 |
| 32 | C | -3.80518900 | 0.70510100  | -2.30996500 |
| 33 | C | -3.55367600 | 0.65068800  | 0.10076700  |
| 34 | C | -4.89028500 | 1.56338500  | -2.17454500 |
| 35 | H | -3.48303000 | 0.38678700  | -3.29983000 |
| 36 | C | -4.64375700 | 1.51610200  | 0.21495400  |

|    |   |             |            |             |
|----|---|-------------|------------|-------------|
| 1  | H | -3.06153100 | 0.27283900 | 0.99003900  |
| 2  | C | -5.32298200 | 1.98206300 | -0.91128000 |
| 3  | H | -5.40193400 | 1.91244400 | -3.06834400 |
| 4  | H | -4.96981000 | 1.81689000 | 1.20810700  |
| 5  | H | -6.17325700 | 2.64980500 | -0.81037300 |
| 6  | C | 1.44040700  | 4.67598700 | 1.73789100  |
| 7  | C | 2.17541400  | 3.76533700 | 0.97666500  |
| 8  | C | 1.52723400  | 2.78241700 | 0.22816000  |
| 9  | C | 0.13442900  | 2.72770000 | 0.25061700  |
| 10 | C | -0.61568900 | 3.62549300 | 1.01218600  |
| 11 | C | 0.04537800  | 4.60275800 | 1.75497500  |
| 12 | H | 1.95148000  | 5.43999300 | 2.31653400  |
| 13 | H | 3.26002600  | 3.81181100 | 0.96030300  |
| 14 | H | 2.09323700  | 2.06748700 | -0.36118400 |
| 15 | H | -1.70074600 | 3.55781400 | 1.02176300  |
| 16 | H | -0.53218000 | 5.30757800 | 2.34608200  |
| 17 | N | -0.54715300 | 1.69623600 | -0.50256900 |
| 18 | H | -0.71023600 | 0.68617300 | 0.00412900  |
| 19 | H | -1.48422400 | 1.97948800 | -0.80141200 |

20

21 **TS7<sub>major\_195K</sub>**

|    |                                              |  |                             |              |
|----|----------------------------------------------|--|-----------------------------|--------------|
| 22 | Zero-point correction=                       |  | 0.766034 (Hartree/Particle) |              |
| 23 | Thermal correction to Energy=                |  | 0.785067                    |              |
| 24 | Thermal correction to Enthalpy=              |  | 0.785685                    |              |
| 25 | Thermal correction to Gibbs Free Energy=     |  | 0.725040                    |              |
| 26 | Sum of electronic and zero-point Energies=   |  |                             | -1961.339466 |
| 27 | Sum of electronic and thermal Energies=      |  |                             | -1961.320433 |
| 28 | Sum of electronic and thermal Enthalpies=    |  |                             | -1961.319816 |
| 29 | Sum of electronic and thermal Free Energies= |  |                             | -1961.380460 |

30 Cartesian Coordinates

| 31 | Atom  | X          | Y           | Z           |
|----|-------|------------|-------------|-------------|
| 32 | ----- |            |             |             |
| 33 | C     | 2.32846800 | -0.81256500 | -0.38720400 |
| 34 | C     | 3.61310100 | -1.45483800 | 0.06678500  |
| 35 | C     | 3.72764800 | -1.96970900 | 1.37037000  |
| 36 | C     | 4.74391700 | -1.52020200 | -0.76235300 |

|    |   |             |             |             |
|----|---|-------------|-------------|-------------|
| 1  | C | 4.91244000  | -2.55389300 | 1.81382900  |
| 2  | H | 2.87450300  | -1.90145200 | 2.03922300  |
| 3  | C | 5.93457400  | -2.09723200 | -0.31790100 |
| 4  | H | 4.69153600  | -1.10908300 | -1.76669300 |
| 5  | C | 6.02516900  | -2.62257000 | 0.97135700  |
| 6  | H | 4.97155700  | -2.94632000 | 2.82654600  |
| 7  | H | 6.79389900  | -2.13502600 | -0.98364000 |
| 8  | H | 6.95269200  | -3.06980000 | 1.31982300  |
| 9  | C | 1.16463900  | -1.66956300 | -0.63189000 |
| 10 | O | 0.15543600  | -1.30577500 | -1.25538000 |
| 11 | O | 1.25344900  | -2.87575900 | -0.01837200 |
| 12 | C | 0.21978400  | -3.89638000 | -0.11823800 |
| 13 | C | 0.88250600  | -5.09343600 | 0.58862900  |
| 14 | H | 1.80212600  | -5.37636800 | 0.06638900  |
| 15 | H | 0.20122300  | -5.94988400 | 0.60385800  |
| 16 | H | 1.13512000  | -4.83162300 | 1.62003100  |
| 17 | C | -0.03891900 | -4.24052500 | -1.59439600 |
| 18 | H | -0.61509800 | -5.16721000 | -1.67849800 |
| 19 | H | 0.92181000  | -4.40291600 | -2.09427700 |
| 20 | H | -0.57124600 | -3.43758800 | -2.10379600 |
| 21 | C | -1.04327000 | -3.50681600 | 0.65713500  |
| 22 | C | -1.03037900 | -2.48584800 | 1.61771000  |
| 23 | C | -2.21852600 | -4.25841700 | 0.50210300  |
| 24 | C | -2.16423200 | -2.22449200 | 2.39122200  |
| 25 | H | -0.14749500 | -1.87340500 | 1.76137200  |
| 26 | C | -3.34768000 | -4.00085600 | 1.28166300  |
| 27 | H | -2.25661300 | -5.06539700 | -0.22403600 |
| 28 | C | -3.32688400 | -2.97916900 | 2.23152400  |
| 29 | H | -2.12823500 | -1.42714200 | 3.12982400  |
| 30 | H | -4.24173100 | -4.60503000 | 1.14776900  |
| 31 | H | -4.20466800 | -2.77591300 | 2.83909300  |
| 32 | N | 2.43392500  | 0.16498100  | -1.45774000 |
| 33 | H | 2.26034700  | -0.17716000 | -2.39578600 |
| 34 | C | 3.15197300  | 1.34801400  | -1.39981000 |
| 35 | C | 3.27334900  | 2.13895500  | -2.56548400 |
| 36 | C | 3.75106600  | 1.82327500  | -0.21392900 |

|    |   |             |             |             |
|----|---|-------------|-------------|-------------|
| 1  | C | 3.94429300  | 3.35684100  | -2.53852600 |
| 2  | H | 2.83778400  | 1.77989300  | -3.49718600 |
| 3  | C | 4.41473700  | 3.05052000  | -0.20336800 |
| 4  | H | 3.71647600  | 1.21703700  | 0.68349500  |
| 5  | C | 4.51863100  | 3.83171600  | -1.35519200 |
| 6  | H | 4.02071400  | 3.93932500  | -3.45393700 |
| 7  | H | 4.87043000  | 3.38967100  | 0.72408100  |
| 8  | H | 5.04472800  | 4.78157700  | -1.33662900 |
| 9  | H | -0.17159600 | 0.51556600  | -0.34157300 |
| 10 | C | -1.09053200 | 4.73252800  | 0.23569500  |
| 11 | C | -0.63292900 | 3.58338300  | 0.88434300  |
| 12 | C | -0.81349000 | 3.41936600  | 2.26960100  |
| 13 | C | -1.46987500 | 4.40671900  | 3.00503400  |
| 14 | C | -1.94308800 | 5.54828900  | 2.35230500  |
| 15 | C | -1.75372400 | 5.71376500  | 0.97638800  |
| 16 | H | -0.91766800 | 4.87887400  | -0.82797000 |
| 17 | H | -1.60747900 | 4.29435000  | 4.07764900  |
| 18 | H | -2.45279300 | 6.32135200  | 2.92144900  |
| 19 | H | -2.11062500 | 6.61467000  | 0.48495000  |
| 20 | C | -0.21450500 | 2.11766400  | 2.74700900  |
| 21 | H | 0.32227500  | 2.21269500  | 3.69712800  |
| 22 | H | -0.98464000 | 1.34716900  | 2.89154000  |
| 23 | C | 0.13316700  | 2.41875100  | 0.31828400  |
| 24 | H | 0.92771200  | 2.70812200  | -0.37356300 |
| 25 | C | 0.72171700  | 1.68086500  | 1.58338300  |
| 26 | H | 1.70673300  | 2.15096900  | 1.74847300  |
| 27 | O | 0.80046400  | 0.31603700  | 1.42427400  |
| 28 | H | 1.66088500  | -0.12194600 | 0.67126100  |
| 29 | C | -2.11507900 | 1.11120700  | -0.00475000 |
| 30 | C | -0.75662500 | 1.68514500  | -1.95376100 |
| 31 | C | -3.00356600 | 1.22856800  | -1.26362300 |
| 32 | H | -2.39660600 | 1.81905100  | 0.77304100  |
| 33 | H | -2.10453900 | 0.10332200  | 0.41157200  |
| 34 | C | -2.00918800 | 0.95462600  | -2.41438500 |
| 35 | H | -0.84789200 | 2.76636500  | -2.08840100 |
| 36 | H | 0.17743300  | 1.33424200  | -2.39074300 |

|    |   |             |             |             |
|----|---|-------------|-------------|-------------|
| 1  | H | -3.32752900 | 2.27431500  | -1.34590200 |
| 2  | H | -1.80238700 | -0.11578700 | -2.50161400 |
| 3  | N | -0.69561300 | 1.40839200  | -0.47075000 |
| 4  | C | -4.23988400 | 0.35194200  | -1.25274900 |
| 5  | C | -5.50781200 | 0.92679000  | -1.40405000 |
| 6  | C | -4.14499600 | -1.04102400 | -1.11758000 |
| 7  | C | -6.65697100 | 0.13474200  | -1.42688300 |
| 8  | H | -5.59631900 | 2.00636800  | -1.50691500 |
| 9  | C | -5.29213700 | -1.83349400 | -1.13923600 |
| 10 | H | -3.17436800 | -1.51471300 | -0.99135200 |
| 11 | C | -6.55134900 | -1.24990800 | -1.29541300 |
| 12 | H | -7.63163000 | 0.60067000  | -1.54610400 |
| 13 | H | -5.19722000 | -2.90952200 | -1.02684800 |
| 14 | H | -7.44337700 | -1.87044600 | -1.31188400 |
| 15 | H | -2.37443000 | 1.32208300  | -3.37785000 |

16

17

**TS7<sub>minor\_195K</sub>**

|    |                                              |                             |
|----|----------------------------------------------|-----------------------------|
| 18 | Zero-point correction=                       | 0.765695 (Hartree/Particle) |
| 19 | Thermal correction to Energy=                | 0.784845                    |
| 20 | Thermal correction to Enthalpy=              | 0.785462                    |
| 21 | Thermal correction to Gibbs Free Energy=     | 0.722975                    |
| 22 | Sum of electronic and zero-point Energies=   | -1961.338569                |
| 23 | Sum of electronic and thermal Energies=      | -1961.319420                |
| 24 | Sum of electronic and thermal Enthalpies=    | -1961.318802                |
| 25 | Sum of electronic and thermal Free Energies= | -1961.381290                |

26

Cartesian Coordinates

| 27 | Atom  | X          | Y           | Z          |
|----|-------|------------|-------------|------------|
| 28 | ----- |            |             |            |
| 29 | C     | 1.62165700 | -1.10109500 | 0.45583300 |
| 30 | C     | 2.50979900 | -1.84518100 | 1.41389700 |
| 31 | C     | 2.98557900 | -1.23932400 | 2.59281300 |
| 32 | C     | 2.84970300 | -3.19237300 | 1.19677600 |
| 33 | C     | 3.78849900 | -1.93766300 | 3.49230100 |
| 34 | H     | 2.72060100 | -0.20811500 | 2.80210500 |
| 35 | C     | 3.64685300 | -3.89465700 | 2.10172600 |
| 36 | H     | 2.48054500 | -3.68983900 | 0.30551600 |

|    |   |             |             |             |
|----|---|-------------|-------------|-------------|
| 1  | C | 4.12627400  | -3.27241800 | 3.25460300  |
| 2  | H | 4.14221300  | -1.43891600 | 4.39208300  |
| 3  | H | 3.89357000  | -4.93497600 | 1.90109200  |
| 4  | H | 4.74455100  | -3.81951700 | 3.96178200  |
| 5  | C | 2.14194300  | 0.06676000  | -0.24801700 |
| 6  | O | 1.71681100  | 0.46665500  | -1.34076800 |
| 7  | O | 3.11267900  | 0.74194600  | 0.44280600  |
| 8  | C | 3.93636400  | 1.74895800  | -0.21909400 |
| 9  | C | 3.09460900  | 2.97474000  | -0.60146500 |
| 10 | H | 2.48154700  | 3.26610800  | 0.25841300  |
| 11 | H | 3.74108800  | 3.82484300  | -0.84514700 |
| 12 | H | 2.44259100  | 2.76023700  | -1.44804000 |
| 13 | C | 4.93783300  | 2.13718300  | 0.88284000  |
| 14 | H | 5.65599500  | 2.86836900  | 0.49811500  |
| 15 | H | 4.41059500  | 2.57561300  | 1.73744300  |
| 16 | H | 5.48698600  | 1.25731000  | 1.22840900  |
| 17 | C | 4.69617500  | 1.11726500  | -1.39106500 |
| 18 | C | 5.19212700  | -0.18959000 | -1.26720600 |
| 19 | C | 4.98532800  | 1.82998100  | -2.56035800 |
| 20 | C | 5.94477700  | -0.76785100 | -2.28797100 |
| 21 | H | 4.97409200  | -0.76109200 | -0.36970100 |
| 22 | C | 5.74463900  | 1.25369700  | -3.58149400 |
| 23 | H | 4.61528000  | 2.84211700  | -2.68898300 |
| 24 | C | 6.22677000  | -0.04778900 | -3.45082900 |
| 25 | H | 6.31190500  | -1.78453600 | -2.17283900 |
| 26 | H | 5.95344100  | 1.82571800  | -4.48219600 |
| 27 | H | 6.81476900  | -0.49784000 | -4.24650200 |
| 28 | N | 0.89450100  | -1.92106200 | -0.49322000 |
| 29 | H | 1.16031100  | -1.80154400 | -1.46266900 |
| 30 | H | -1.25448200 | 0.05389700  | 0.22524700  |
| 31 | C | -0.18763100 | -2.73698300 | -0.25693500 |
| 32 | C | -0.79664600 | -3.40784700 | -1.34687800 |
| 33 | C | -0.72030700 | -2.96046700 | 1.03372100  |
| 34 | C | -1.88627500 | -4.25088500 | -1.15406200 |
| 35 | H | -0.38678500 | -3.27014300 | -2.34640400 |
| 36 | C | -1.81502600 | -3.80545400 | 1.20588100  |

|    |   |             |             |             |
|----|---|-------------|-------------|-------------|
| 1  | H | -0.27193400 | -2.47476500 | 1.89132100  |
| 2  | C | -2.41403700 | -4.45981800 | 0.12511500  |
| 3  | H | -2.32304100 | -4.75507100 | -2.01338800 |
| 4  | H | -2.19799800 | -3.96159000 | 2.21206600  |
| 5  | H | -3.25462500 | -5.13110400 | 0.27636400  |
| 6  | C | -2.02738400 | 4.27512500  | -0.24357900 |
| 7  | C | -1.60031100 | 3.25745600  | 0.61228500  |
| 8  | C | -1.78364100 | 3.35954700  | 2.00219600  |
| 9  | C | -2.40714000 | 4.48671400  | 2.53801900  |
| 10 | C | -2.84567100 | 5.49959500  | 1.68082000  |
| 11 | C | -2.65751900 | 5.39752400  | 0.29819000  |
| 12 | H | -1.86039600 | 4.20700200  | -1.31610100 |
| 13 | H | -2.54707600 | 4.58117600  | 3.61194900  |
| 14 | H | -3.32963000 | 6.38095500  | 2.09325300  |
| 15 | H | -2.99096900 | 6.19956600  | -0.35436000 |
| 16 | C | -1.23253200 | 2.14897900  | 2.71987400  |
| 17 | H | -0.67918500 | 2.40340300  | 3.63023700  |
| 18 | H | -2.03258700 | 1.45758200  | 3.01752200  |
| 19 | C | -0.87188400 | 1.98920700  | 0.27298000  |
| 20 | H | -0.06069700 | 2.11260100  | -0.44682900 |
| 21 | C | -0.33615200 | 1.45148700  | 1.66227900  |
| 22 | H | 0.69699500  | 1.81519300  | 1.76189000  |
| 23 | O | -0.39909700 | 0.06244500  | 1.71783600  |
| 24 | H | 0.55738000  | -0.41547800 | 1.24598100  |
| 25 | C | -3.18751000 | 0.76509400  | 0.04038700  |
| 26 | C | -1.57454700 | 0.65229700  | -1.79255800 |
| 27 | C | -3.90825300 | 0.41570900  | -1.28444900 |
| 28 | H | -3.52058500 | 1.71179200  | 0.46418700  |
| 29 | H | -3.29296100 | -0.01909300 | 0.79247600  |
| 30 | C | -2.78340600 | -0.20362300 | -2.14746700 |
| 31 | H | -1.63401500 | 1.63991500  | -2.26146500 |
| 32 | H | -0.58863300 | 0.22477900  | -1.98458200 |
| 33 | H | -4.20477500 | 1.36044300  | -1.75796900 |
| 34 | H | -2.60468500 | -1.24943600 | -1.87476000 |
| 35 | H | -3.01472900 | -0.16759200 | -3.21594400 |
| 36 | N | -1.71002700 | 0.85093000  | -0.30298400 |

|    |   |             |             |             |
|----|---|-------------|-------------|-------------|
| 1  | C | -5.15437300 | -0.43006200 | -1.10468000 |
| 2  | C | -6.40362400 | 0.07213600  | -1.48891900 |
| 3  | C | -5.08834300 | -1.72026100 | -0.55687300 |
| 4  | C | -7.56261600 | -0.69063600 | -1.33396300 |
| 5  | H | -6.47052100 | 1.07108000  | -1.91505000 |
| 6  | C | -6.24519600 | -2.48317300 | -0.40153300 |
| 7  | H | -4.13427600 | -2.14523300 | -0.25348300 |
| 8  | C | -7.48613300 | -1.97205400 | -0.78857000 |
| 9  | H | -8.52230800 | -0.28211300 | -1.63925100 |
| 10 | H | -6.17290600 | -3.48146200 | 0.02149300  |
| 11 | H | -8.38573100 | -2.56918500 | -0.66626900 |

12

13

### TS11<sub>195K</sub>

|    |                                              |  |                             |              |
|----|----------------------------------------------|--|-----------------------------|--------------|
| 14 | Zero-point correction=                       |  | 0.880552 (Hartree/Particle) |              |
| 15 | Thermal correction to Energy=                |  |                             | 0.905036     |
| 16 | Thermal correction to Enthalpy=              |  |                             | 0.905653     |
| 17 | Thermal correction to Gibbs Free Energy=     |  |                             | 0.829050     |
| 18 | Sum of electronic and zero-point Energies=   |  |                             | -2245.040665 |
| 19 | Sum of electronic and thermal Energies=      |  |                             | -2245.016182 |
| 20 | Sum of electronic and thermal Enthalpies=    |  |                             | -2245.015564 |
| 21 | Sum of electronic and thermal Free Energies= |  |                             | -2245.092168 |

22

### Cartesian Coordinates

| 23 | Atom  | X           | Y          | Z           |
|----|-------|-------------|------------|-------------|
| 24 | ----- |             |            |             |
| 25 | C     | -2.09364000 | 0.72313600 | -0.83658700 |
| 26 | C     | -3.06447700 | 1.86468600 | -0.87604600 |
| 27 | C     | -3.76397300 | 2.34808500 | 0.25463200  |
| 28 | C     | -3.26984500 | 2.56100700 | -2.08717400 |
| 29 | C     | -4.62677000 | 3.44304000 | 0.16696400  |
| 30 | H     | -3.64692100 | 1.85242600 | 1.20989100  |
| 31 | C     | -4.12722500 | 3.65622300 | -2.16819800 |
| 32 | H     | -2.75389200 | 2.22003300 | -2.97699300 |
| 33 | C     | -4.81665500 | 4.11100500 | -1.04283000 |
| 34 | H     | -5.15318500 | 3.77336700 | 1.06011300  |
| 35 | H     | -4.25861200 | 4.15564800 | -3.12550600 |
| 36 | H     | -5.48537700 | 4.96509700 | -1.10689600 |

|    |   |             |             |             |
|----|---|-------------|-------------|-------------|
| 1  | C | -2.39720900 | -0.50735800 | -0.12733500 |
| 2  | O | -2.05525000 | -1.63831600 | -0.49904200 |
| 3  | O | -3.03859800 | -0.31222900 | 1.07695800  |
| 4  | N | -1.46971200 | 0.40096600  | -2.10196800 |
| 5  | H | -1.65848100 | -0.54644200 | -2.40836800 |
| 6  | H | 0.10930700  | -3.88524100 | 1.08520900  |
| 7  | C | -0.31815900 | 0.96045100  | -2.61456100 |
| 8  | C | 0.34903900  | 0.31981100  | -3.68633400 |
| 9  | C | 0.20761900  | 2.18604200  | -2.15327000 |
| 10 | C | 1.49484300  | 0.86993000  | -4.24971500 |
| 11 | H | -0.05643500 | -0.61102200 | -4.07879500 |
| 12 | C | 1.36158800  | 2.72288100  | -2.72403000 |
| 13 | H | -0.30565200 | 2.72980400  | -1.36924000 |
| 14 | C | 2.02435300  | 2.07528700  | -3.77061800 |
| 15 | H | 1.98203000  | 0.35177400  | -5.07255900 |
| 16 | H | 1.73806300  | 3.67115000  | -2.34698000 |
| 17 | H | 2.91641600  | 2.50525000  | -4.21614800 |
| 18 | H | -0.55447100 | -2.75168000 | 0.03404100  |
| 19 | H | 0.38654700  | 0.73603700  | 1.32215900  |
| 20 | H | -1.00413400 | 1.24142600  | 0.31271700  |
| 21 | C | -3.75790200 | -1.40896600 | 1.73425700  |
| 22 | N | 0.30658700  | -3.18115800 | 0.38228000  |
| 23 | C | 1.19504700  | -3.61057300 | -0.61711200 |
| 24 | C | 2.17117000  | -4.58416600 | -0.35003000 |
| 25 | C | 3.09587300  | -4.94443000 | -1.32920200 |
| 26 | C | 3.07108900  | -4.34432900 | -2.59069800 |
| 27 | C | 2.09780500  | -3.37785800 | -2.86070400 |
| 28 | C | 1.16728700  | -3.01107900 | -1.88845000 |
| 29 | H | 2.20724500  | -5.05132400 | 0.63190600  |
| 30 | H | 3.84119500  | -5.70257900 | -1.10218500 |
| 31 | H | 3.79134700  | -4.62954200 | -3.35168400 |
| 32 | H | 2.05534600  | -2.90534900 | -3.83904700 |
| 33 | H | 0.41088400  | -2.26079200 | -2.10018200 |
| 34 | N | -0.38641300 | 1.46382200  | 1.29349900  |
| 35 | C | -4.45914900 | -0.69798100 | 2.90485400  |
| 36 | H | -5.05926200 | -1.41573800 | 3.47269900  |

|    |   |             |             |             |
|----|---|-------------|-------------|-------------|
| 1  | H | -3.72053600 | -0.24994000 | 3.57995000  |
| 2  | H | -5.12239200 | 0.08952700  | 2.53716700  |
| 3  | C | -2.76657600 | -2.44157900 | 2.28812600  |
| 4  | H | -2.35933600 | -3.06779100 | 1.49523500  |
| 5  | H | -1.94433400 | -1.91655100 | 2.78611900  |
| 6  | H | -3.25331300 | -3.07862700 | 3.03433000  |
| 7  | C | -4.81386600 | -1.99505500 | 0.79180800  |
| 8  | C | -5.11809200 | -3.36135400 | 0.78068000  |
| 9  | C | -5.56004100 | -1.13858100 | -0.03181900 |
| 10 | C | -6.13574700 | -3.86168200 | -0.03463700 |
| 11 | H | -4.56121300 | -4.05193800 | 1.40571800  |
| 12 | C | -6.57082000 | -1.63819000 | -0.85135400 |
| 13 | H | -5.34020500 | -0.07504300 | -0.04235200 |
| 14 | C | -6.86504900 | -3.00307200 | -0.85566600 |
| 15 | H | -6.35156900 | -4.92703200 | -0.02902700 |
| 16 | H | -7.12853900 | -0.95705100 | -1.48872600 |
| 17 | H | -7.65346900 | -3.39265800 | -1.49415300 |
| 18 | H | 1.14417600  | -1.45085200 | 1.15168200  |
| 19 | H | 2.26541100  | -0.38969600 | 0.53440400  |
| 20 | N | 1.66250400  | -0.58294300 | 1.34700400  |
| 21 | C | 2.38600500  | -0.65538500 | 2.56252700  |
| 22 | C | 1.82009700  | -1.28566800 | 3.68297700  |
| 23 | C | 2.49864200  | -1.30878300 | 4.89978700  |
| 24 | C | 3.74935700  | -0.69971400 | 5.02797200  |
| 25 | C | 4.31628600  | -0.07458900 | 3.91630700  |
| 26 | C | 3.64765400  | -0.05234700 | 2.69185800  |
| 27 | H | 0.84526400  | -1.76026500 | 3.59049800  |
| 28 | H | 2.04543600  | -1.80602400 | 5.75396400  |
| 29 | H | 4.27520100  | -0.71756300 | 5.97820700  |
| 30 | H | 5.29476100  | 0.39255000  | 3.99415700  |
| 31 | H | 4.11226400  | 0.41119700  | 1.82487100  |
| 32 | H | 3.04672700  | -1.12811100 | -1.64789800 |
| 33 | H | 2.82578600  | 0.50838800  | -1.82204700 |
| 34 | N | 3.28792600  | -0.21377200 | -1.27327900 |
| 35 | C | 4.67406100  | -0.01028800 | -1.12744900 |
| 36 | C | 5.53982700  | -1.09721800 | -0.92188000 |

|    |   |             |             |             |
|----|---|-------------|-------------|-------------|
| 1  | C | 6.90069200  | -0.88206200 | -0.71370300 |
| 2  | C | 7.42692000  | 0.41193000  | -0.70434200 |
| 3  | C | 6.56789300  | 1.49372400  | -0.90818600 |
| 4  | C | 5.20434700  | 1.29062400  | -1.11665800 |
| 5  | H | 5.13787200  | -2.10794600 | -0.92896100 |
| 6  | H | 7.55534600  | -1.73634900 | -0.55986800 |
| 7  | H | 8.48884300  | 0.57397600  | -0.54365100 |
| 8  | H | 6.96032000  | 2.50778200  | -0.90971500 |
| 9  | H | 4.54090100  | 2.13663200  | -1.28097600 |
| 10 | C | 0.13311200  | 2.81764600  | 1.46045000  |
| 11 | C | -0.72484700 | 3.90918100  | 1.30882000  |
| 12 | C | 1.48457800  | 3.00614200  | 1.75440400  |
| 13 | C | -0.21895300 | 5.20059600  | 1.45924200  |
| 14 | H | -1.77145200 | 3.75144800  | 1.06501900  |
| 15 | C | 1.97913200  | 4.30347700  | 1.89742300  |
| 16 | H | 2.14116100  | 2.15292800  | 1.88932300  |
| 17 | C | 1.13148500  | 5.40227800  | 1.75114300  |
| 18 | H | -0.88566300 | 6.04976700  | 1.33956200  |
| 19 | H | 3.03006300  | 4.44963200  | 2.13023500  |
| 20 | H | 1.52066500  | 6.41026400  | 1.86334800  |
| 21 | H | -1.05642200 | 1.22375700  | 2.02949600  |

22

23

**TS10<sub>195K</sub>**

|    |                                              |  |                             |
|----|----------------------------------------------|--|-----------------------------|
| 24 | Zero-point correction=                       |  | 0.761557 (Hartree/Particle) |
| 25 | Thermal correction to Energy=                |  | 0.782318                    |
| 26 | Thermal correction to Enthalpy=              |  | 0.782936                    |
| 27 | Thermal correction to Gibbs Free Energy=     |  | 0.716296                    |
| 28 | Sum of electronic and zero-point Energies=   |  | -1957.548122                |
| 29 | Sum of electronic and thermal Energies=      |  | -1957.527362                |
| 30 | Sum of electronic and thermal Enthalpies=    |  | -1957.526744                |
| 31 | Sum of electronic and thermal Free Energies= |  | -1957.593384                |

32

Cartesian Coordinates

| 33 | Atom  | X          | Y           | Z          |
|----|-------|------------|-------------|------------|
| 34 | ----- |            |             |            |
| 35 | C     | 1.82095300 | -0.75867800 | 1.17619800 |
| 36 | C     | 3.30568000 | -0.75546400 | 1.35187000 |

|    |   |             |             |             |
|----|---|-------------|-------------|-------------|
| 1  | C | 4.20529000  | -1.11504100 | 0.32395400  |
| 2  | C | 3.87147400  | -0.32198400 | 2.56803600  |
| 3  | C | 5.58564300  | -1.05446300 | 0.51064600  |
| 4  | H | 3.81906200  | -1.47050000 | -0.62389700 |
| 5  | C | 5.25250500  | -0.26016500 | 2.75074100  |
| 6  | H | 3.20902900  | -0.04188600 | 3.37944000  |
| 7  | C | 6.12467500  | -0.62481400 | 1.72472600  |
| 8  | H | 6.24458300  | -1.34829600 | -0.30376000 |
| 9  | H | 5.64686200  | 0.07393300  | 3.70782500  |
| 10 | H | 7.20099200  | -0.57507500 | 1.86658800  |
| 11 | C | 1.11730000  | -1.88320900 | 0.59472100  |
| 12 | O | -0.09142500 | -2.11032200 | 0.78134400  |
| 13 | O | 1.86201100  | -2.65770000 | -0.25469100 |
| 14 | N | 1.04988300  | -0.23737000 | 2.29286300  |
| 15 | H | 0.30492800  | -0.86701800 | 2.56802600  |
| 16 | H | -3.06156300 | -1.51574100 | -0.99244800 |
| 17 | C | 0.76449600  | 1.09578200  | 2.52480400  |
| 18 | C | -0.35148600 | 1.43674800  | 3.32651400  |
| 19 | C | 1.56726800  | 2.14710800  | 2.03121700  |
| 20 | C | -0.64934200 | 2.76656900  | 3.61182100  |
| 21 | H | -0.97814700 | 0.64176700  | 3.72690500  |
| 22 | C | 1.25012700  | 3.47378700  | 2.31906200  |
| 23 | H | 2.44731400  | 1.91798100  | 1.44121400  |
| 24 | C | 0.14413700  | 3.80331000  | 3.10687900  |
| 25 | H | -1.51293600 | 2.99354600  | 4.23264100  |
| 26 | H | 1.88733500  | 4.26115600  | 1.92335900  |
| 27 | H | -0.08543900 | 4.83947700  | 3.33755400  |
| 28 | H | -1.87194000 | -1.64852300 | 0.16567300  |
| 29 | H | -0.08230800 | 1.18264100  | -0.54071700 |
| 30 | H | 1.36913800  | 0.21689000  | -0.06482900 |
| 31 | C | 1.24472100  | -3.76795300 | -0.97740800 |
| 32 | N | -2.80430000 | -1.28063900 | -0.03832500 |
| 33 | C | -3.77506200 | -1.66949900 | 0.90902600  |
| 34 | C | -5.14269200 | -1.62450200 | 0.59628100  |
| 35 | C | -6.09740600 | -1.95566800 | 1.55615700  |
| 36 | C | -5.71106000 | -2.33238500 | 2.84414600  |

|    |   |             |             |             |
|----|---|-------------|-------------|-------------|
| 1  | C | -4.35071000 | -2.37841500 | 3.15726400  |
| 2  | C | -3.38785700 | -2.05421500 | 2.20312900  |
| 3  | H | -5.45392400 | -1.32078800 | -0.40131800 |
| 4  | H | -7.15176000 | -1.91619600 | 1.29359400  |
| 5  | H | -6.45767900 | -2.58825700 | 3.59038500  |
| 6  | H | -4.03195100 | -2.67762500 | 4.15283600  |
| 7  | H | -2.32900500 | -2.11013400 | 2.44197400  |
| 8  | N | 0.82982600  | 0.82321800  | -0.93594500 |
| 9  | C | 0.70067000  | -4.81630300 | 0.00190300  |
| 10 | H | 0.44185400  | -5.73705800 | -0.53231500 |
| 11 | H | 1.48631800  | -5.05914900 | 0.72406800  |
| 12 | H | -0.16971200 | -4.45266600 | 0.54637700  |
| 13 | C | 2.42995800  | -4.37438500 | -1.74881700 |
| 14 | H | 2.88865500  | -3.63959100 | -2.41646800 |
| 15 | H | 3.19216000  | -4.72253300 | -1.04487600 |
| 16 | H | 2.09077800  | -5.22210100 | -2.35268400 |
| 17 | C | 0.21206400  | -3.22051900 | -1.97141000 |
| 18 | C | -1.06251000 | -3.77498600 | -2.12501300 |
| 19 | C | 0.57182900  | -2.15165300 | -2.81160000 |
| 20 | C | -1.95613900 | -3.27193500 | -3.07680200 |
| 21 | H | -1.37431900 | -4.60201400 | -1.49649700 |
| 22 | C | -0.31861000 | -1.64118400 | -3.75679500 |
| 23 | H | 1.56999100  | -1.72770200 | -2.73205200 |
| 24 | C | -1.59311000 | -2.19996200 | -3.89176100 |
| 25 | H | -2.93838200 | -3.72657200 | -3.17939800 |
| 26 | H | -0.01263900 | -0.81948700 | -4.39983300 |
| 27 | H | -2.28642000 | -1.81198800 | -4.63295100 |
| 28 | H | -2.23570700 | 0.68860200  | 0.09125800  |
| 29 | H | -1.54108000 | 1.83151200  | 1.09897500  |
| 30 | N | -1.76400500 | 1.60420500  | 0.13014600  |
| 31 | C | -2.47382300 | 2.63270200  | -0.53080700 |
| 32 | C | -3.29235500 | 2.33445800  | -1.63223100 |
| 33 | C | -3.94507400 | 3.35475900  | -2.32214400 |
| 34 | C | -3.79329200 | 4.68753300  | -1.93360800 |
| 35 | C | -2.97688400 | 4.98676700  | -0.84075700 |
| 36 | C | -2.31941800 | 3.97393100  | -0.14316400 |

|    |   |             |            |             |
|----|---|-------------|------------|-------------|
| 1  | H | -3.41811200 | 1.29811300 | -1.93585600 |
| 2  | H | -4.58040200 | 3.10357400 | -3.16793800 |
| 3  | H | -4.30532400 | 5.47972600 | -2.47213300 |
| 4  | H | -2.85106600 | 6.01857300 | -0.52207600 |
| 5  | H | -1.68558100 | 4.21136800 | 0.70825900  |
| 6  | C | 1.62117200  | 1.88598200 | -1.54881100 |
| 7  | C | 1.00186800  | 3.07301700 | -1.94375600 |
| 8  | C | 2.99318800  | 1.70099600 | -1.72752600 |
| 9  | C | 1.76746600  | 4.07964600 | -2.53392200 |
| 10 | H | -0.06387400 | 3.21339800 | -1.79115700 |
| 11 | C | 3.74774200  | 2.71371500 | -2.32143900 |
| 12 | H | 3.47282700  | 0.78965600 | -1.38305700 |
| 13 | C | 3.13832500  | 3.90195300 | -2.72787600 |
| 14 | H | 1.28621400  | 5.00397400 | -2.84054100 |
| 15 | H | 4.81647900  | 2.57307300 | -2.45525200 |
| 16 | H | 3.73050800  | 4.68887000 | -3.18640600 |
| 17 | H | 0.57939000  | 0.10304200 | -1.62359200 |

18

19

**TS9<sub>195K</sub>**

|    |                                              |  |                             |
|----|----------------------------------------------|--|-----------------------------|
| 20 | Zero-point correction=                       |  | 0.643668 (Hartree/Particle) |
| 21 | Thermal correction to Energy=                |  | 0.660719                    |
| 22 | Thermal correction to Enthalpy=              |  | 0.661337                    |
| 23 | Thermal correction to Gibbs Free Energy=     |  | 0.603777                    |
| 24 | Sum of electronic and zero-point Energies=   |  | -1670.045102                |
| 25 | Sum of electronic and thermal Energies=      |  | -1670.028051                |
| 26 | Sum of electronic and thermal Enthalpies=    |  | -1670.027434                |
| 27 | Sum of electronic and thermal Free Energies= |  | -1670.084994                |

28

Cartesian Coordinates

| 29 | Atom  | X           | Y           | Z           |
|----|-------|-------------|-------------|-------------|
| 30 | ----- |             |             |             |
| 31 | C     | -0.88927900 | -0.92276300 | 0.74542000  |
| 32 | C     | -1.47950800 | -2.23730900 | 0.38606000  |
| 33 | C     | -1.94196700 | -2.57039000 | -0.91054500 |
| 34 | C     | -1.53017600 | -3.26361100 | 1.35651800  |
| 35 | C     | -2.43624900 | -3.84287700 | -1.20212800 |
| 36 | H     | -1.93287800 | -1.81981400 | -1.69076000 |

|    |   |             |             |             |
|----|---|-------------|-------------|-------------|
| 1  | C | -2.02219100 | -4.53182200 | 1.05745700  |
| 2  | H | -1.18556600 | -3.04082700 | 2.36026000  |
| 3  | C | -2.48097600 | -4.83834100 | -0.22527800 |
| 4  | H | -2.79133600 | -4.05288800 | -2.20914800 |
| 5  | H | -2.04962800 | -5.28717800 | 1.83985600  |
| 6  | H | -2.86377100 | -5.82840200 | -0.45785700 |
| 7  | C | -1.34322500 | 0.35294200  | 0.26102300  |
| 8  | O | -1.15428200 | 1.43573100  | 0.84308800  |
| 9  | O | -1.90461800 | 0.32044400  | -1.00738700 |
| 10 | N | -0.37878600 | -0.78971500 | 2.09797900  |
| 11 | H | -0.76942600 | 0.02825200  | 2.55489700  |
| 12 | H | 0.84240500  | 1.95161700  | 0.71311500  |
| 13 | C | 0.95252300  | -0.99998000 | 2.43562800  |
| 14 | C | 1.53962900  | -0.25607100 | 3.48424500  |
| 15 | C | 1.74940900  | -1.96625500 | 1.78602200  |
| 16 | C | 2.86797400  | -0.46151100 | 3.85163200  |
| 17 | H | 0.93857500  | 0.48543700  | 4.00735600  |
| 18 | C | 3.07927300  | -2.15565300 | 2.15957100  |
| 19 | H | 1.31088300  | -2.58414900 | 1.00979300  |
| 20 | C | 3.65621500  | -1.40707600 | 3.18814000  |
| 21 | H | 3.29069000  | 0.12906800  | 4.66119200  |
| 22 | H | 3.66844100  | -2.90719000 | 1.63928000  |
| 23 | H | 4.69148500  | -1.56476200 | 3.47608900  |
| 24 | H | 2.15733900  | 1.20485200  | 1.38142300  |
| 25 | H | 1.57117700  | 0.39588600  | -0.69222800 |
| 26 | H | 0.42593000  | -0.81717800 | -0.40272400 |
| 27 | C | -2.75264800 | 1.42565200  | -1.46203300 |
| 28 | N | 1.82823200  | 1.71327700  | 0.56086500  |
| 29 | C | 2.66067300  | 2.80297800  | 0.20933500  |
| 30 | C | 2.13967400  | 3.90434800  | -0.48535800 |
| 31 | C | 2.98084600  | 4.94000800  | -0.88927400 |
| 32 | C | 4.34877500  | 4.89695800  | -0.61110500 |
| 33 | C | 4.86759600  | 3.80196500  | 0.08259100  |
| 34 | C | 4.03472400  | 2.76080500  | 0.49079900  |
| 35 | H | 1.07460300  | 3.94592100  | -0.70106500 |
| 36 | H | 2.56047400  | 5.78921200  | -1.42196600 |

|    |   |             |             |             |
|----|---|-------------|-------------|-------------|
| 1  | H | 4.99971000  | 5.70735700  | -0.92584900 |
| 2  | H | 5.92868900  | 3.75671700  | 0.31424400  |
| 3  | H | 4.44150000  | 1.91353500  | 1.03916400  |
| 4  | N | 1.13575800  | -0.42831800 | -1.19581600 |
| 5  | C | -3.31582600 | 0.89894600  | -2.79346600 |
| 6  | H | -3.99250100 | 1.63859400  | -3.23295100 |
| 7  | H | -2.50319600 | 0.70502500  | -3.50351300 |
| 8  | H | -3.87312600 | -0.02872800 | -2.63795900 |
| 9  | C | -1.90260300 | 2.67626400  | -1.72684300 |
| 10 | H | -1.54804000 | 3.11651800  | -0.79524100 |
| 11 | H | -1.03813200 | 2.39728800  | -2.34049900 |
| 12 | H | -2.47497100 | 3.42019500  | -2.29127500 |
| 13 | C | -3.90515700 | 1.64295700  | -0.47650500 |
| 14 | C | -4.39621700 | 2.91799400  | -0.17381200 |
| 15 | C | -4.54440900 | 0.52967100  | 0.09036800  |
| 16 | C | -5.49441700 | 3.07919200  | 0.67403700  |
| 17 | H | -3.92212800 | 3.80044500  | -0.59086100 |
| 18 | C | -5.63612400 | 0.68977900  | 0.94193600  |
| 19 | H | -4.17471600 | -0.46861000 | -0.12549400 |
| 20 | C | -6.11842000 | 1.96668000  | 1.23640700  |
| 21 | H | -5.85582600 | 4.07967200  | 0.89793200  |
| 22 | H | -6.10941700 | -0.18668000 | 1.37690900  |
| 23 | H | -6.96999700 | 2.09223000  | 1.89990200  |
| 24 | C | 2.10809500  | -1.36689700 | -1.74011600 |
| 25 | C | 3.45375700  | -1.00574500 | -1.79638700 |
| 26 | C | 1.67412000  | -2.61800900 | -2.18021300 |
| 27 | C | 4.37985100  | -1.91371700 | -2.31179500 |
| 28 | H | 3.77352100  | -0.02863200 | -1.44432300 |
| 29 | C | 2.60932900  | -3.51470000 | -2.69718200 |
| 30 | H | 0.62424900  | -2.88968700 | -2.10255600 |
| 31 | C | 3.96006600  | -3.16555400 | -2.76487500 |
| 32 | H | 5.42943900  | -1.63846600 | -2.35919100 |
| 33 | H | 2.27953500  | -4.49122100 | -3.03946400 |
| 34 | H | 4.68402500  | -3.86949100 | -3.16503900 |
| 35 | H | 0.49793700  | -0.06318200 | -1.90989300 |
| 36 |   |             |             |             |

|    |                                              |             |             |                             |
|----|----------------------------------------------|-------------|-------------|-----------------------------|
| 1  | <b>TS8<sub>195K</sub></b>                    |             |             |                             |
| 2  | Zero-point correction=                       |             |             | 0.523803 (Hartree/Particle) |
| 3  | Thermal correction to Energy=                |             |             | 0.537312                    |
| 4  | Thermal correction to Enthalpy=              |             |             | 0.537930                    |
| 5  | Thermal correction to Gibbs Free Energy=     |             |             | 0.489844                    |
| 6  | Sum of electronic and zero-point Energies=   |             |             | -1382.542753                |
| 7  | Sum of electronic and thermal Energies=      |             |             | -1382.529244                |
| 8  | Sum of electronic and thermal Enthalpies=    |             |             | -1382.528626                |
| 9  | Sum of electronic and thermal Free Energies= |             |             | -1382.576712                |
| 10 | Cartesian Coordinates                        |             |             |                             |
| 11 | Atom                                         | X           | Y           | Z                           |
| 12 | -----                                        |             |             |                             |
| 13 | C                                            | -1.06245100 | -1.00376400 | -0.33874900                 |
| 14 | C                                            | -1.51821900 | -1.93998200 | 0.72259300                  |
| 15 | C                                            | -0.80432700 | -2.08228800 | 1.92928900                  |
| 16 | C                                            | -2.70880100 | -2.67748800 | 0.58558800                  |
| 17 | C                                            | -1.24179900 | -2.94162300 | 2.93314500                  |
| 18 | H                                            | 0.10378300  | -1.50487700 | 2.07610600                  |
| 19 | C                                            | -3.15278600 | -3.53084600 | 1.59619300                  |
| 20 | H                                            | -3.28397600 | -2.57889900 | -0.32972600                 |
| 21 | C                                            | -2.42203200 | -3.67417500 | 2.77579300                  |
| 22 | H                                            | -0.66409400 | -3.03126400 | 3.85048600                  |
| 23 | H                                            | -4.07581300 | -4.08901500 | 1.45612500                  |
| 24 | H                                            | -2.76877300 | -4.33734000 | 3.56401600                  |
| 25 | C                                            | 0.25809600  | -1.07328800 | -0.91219100                 |
| 26 | O                                            | 0.63624500  | -0.33900900 | -1.85752900                 |
| 27 | O                                            | 1.08947000  | -1.98827300 | -0.33821900                 |
| 28 | C                                            | 2.45054100  | -2.19340500 | -0.83070200                 |
| 29 | C                                            | 2.92188700  | -3.40244400 | -0.00271100                 |
| 30 | H                                            | 2.28673600  | -4.26854700 | -0.21357600                 |
| 31 | H                                            | 3.95778200  | -3.65020700 | -0.25566400                 |
| 32 | H                                            | 2.86819800  | -3.19191300 | 1.06859100                  |
| 33 | C                                            | 2.43231800  | -2.58673600 | -2.31412000                 |
| 34 | H                                            | 3.41676200  | -2.95864600 | -2.61842900                 |
| 35 | H                                            | 1.71205500  | -3.39955200 | -2.45161400                 |
| 36 | H                                            | 2.14188900  | -1.75339000 | -2.95260700                 |

|    |   |             |             |             |
|----|---|-------------|-------------|-------------|
| 1  | C | 3.32821100  | -0.98051200 | -0.50153800 |
| 2  | C | 4.19246000  | -0.39756600 | -1.43630200 |
| 3  | C | 3.33474100  | -0.47692100 | 0.80892600  |
| 4  | C | 5.04671200  | 0.64640900  | -1.07176900 |
| 5  | H | 4.20605600  | -0.75492600 | -2.46017200 |
| 6  | C | 4.18865300  | 0.56147600  | 1.17798000  |
| 7  | H | 2.66396000  | -0.90576700 | 1.54778500  |
| 8  | C | 5.05452800  | 1.12635900  | 0.23801600  |
| 9  | H | 5.71053200  | 1.07971700  | -1.81560000 |
| 10 | H | 4.17841900  | 0.92802000  | 2.20124500  |
| 11 | H | 5.73020900  | 1.92820900  | 0.52487600  |
| 12 | N | -2.03615500 | -0.62686600 | -1.34135200 |
| 13 | H | -1.74379800 | -0.76689100 | -2.30062200 |
| 14 | H | -0.01621600 | 1.32789200  | -1.32034900 |
| 15 | C | -3.11136100 | 0.22491900  | -1.17374100 |
| 16 | C | -3.80518900 | 0.70510100  | -2.30996500 |
| 17 | C | -3.55367600 | 0.65068800  | 0.10076700  |
| 18 | C | -4.89028500 | 1.56338500  | -2.17454500 |
| 19 | H | -3.48303000 | 0.38678700  | -3.29983000 |
| 20 | C | -4.64375700 | 1.51610200  | 0.21495400  |
| 21 | H | -3.06153100 | 0.27283900  | 0.99003900  |
| 22 | C | -5.32298200 | 1.98206300  | -0.91128000 |
| 23 | H | -5.40193400 | 1.91244400  | -3.06834400 |
| 24 | H | -4.96981000 | 1.81689000  | 1.20810700  |
| 25 | H | -6.17325700 | 2.64980500  | -0.81037300 |
| 26 | C | 1.44040700  | 4.67598700  | 1.73789100  |
| 27 | C | 2.17541400  | 3.76533700  | 0.97666500  |
| 28 | C | 1.52723400  | 2.78241700  | 0.22816000  |
| 29 | C | 0.13442900  | 2.72770000  | 0.25061700  |
| 30 | C | -0.61568900 | 3.62549300  | 1.01218600  |
| 31 | C | 0.04537800  | 4.60275800  | 1.75497500  |
| 32 | H | 1.95148000  | 5.43999300  | 2.31653400  |
| 33 | H | 3.26002600  | 3.81181100  | 0.96030300  |
| 34 | H | 2.09323700  | 2.06748700  | -0.36118400 |
| 35 | H | -1.70074600 | 3.55781400  | 1.02176300  |
| 36 | H | -0.53218000 | 5.30757800  | 2.34608200  |

|    |                                              |             |                       |                    |
|----|----------------------------------------------|-------------|-----------------------|--------------------|
| 1  | N                                            | -0.54715300 | 1.69623600            | -0.50256900        |
| 2  | H                                            | -0.71023600 | 0.68617300            | 0.00412900         |
| 3  | H                                            | -1.48422400 | 1.97948800            | -0.80141200        |
| 4  |                                              |             |                       |                    |
| 5  |                                              |             | 7                     |                    |
| 6  | Zero-point correction=                       |             | 0.361746              | (Hartree/Particle) |
| 7  | Thermal correction to Energy=                |             |                       | 0.378732           |
| 8  | Thermal correction to Enthalpy=              |             |                       | 0.379676           |
| 9  | Thermal correction to Gibbs Free Energy=     |             |                       | 0.315413           |
| 10 | Sum of electronic and zero-point Energies=   |             |                       | -866.268698        |
| 11 | Sum of electronic and thermal Energies=      |             |                       | -866.251712        |
| 12 | Sum of electronic and thermal Enthalpies=    |             |                       | -866.250768        |
| 13 | Sum of electronic and thermal Free Energies= |             |                       | -866.315031        |
| 14 |                                              |             | Cartesian Coordinates |                    |
| 15 | Atom                                         | X           | Y                     | Z                  |
| 16 | -----                                        |             |                       |                    |
| 17 | H                                            | 0.22343600  | -1.50529100           | 1.57016800         |
| 18 | C                                            | -3.36488100 | 1.39097200            | 0.13705100         |
| 19 | C                                            | -2.68633300 | 0.17733800            | 0.25660400         |
| 20 | C                                            | -2.93146400 | -0.86904300           | -0.64637300        |
| 21 | C                                            | -3.86135800 | -0.70414600           | -1.67266900        |
| 22 | C                                            | -4.53622300 | 0.51364700            | -1.79606700        |
| 23 | C                                            | -4.29070100 | 1.55625800            | -0.89681000        |
| 24 | H                                            | -3.18876000 | 2.19710300            | 0.84559400         |
| 25 | H                                            | -4.06367000 | -1.51412700           | -2.36969000        |
| 26 | H                                            | -5.26334600 | 0.64901900            | -2.59263500        |
| 27 | H                                            | -4.82959900 | 2.49481200            | -0.99647200        |
| 28 | C                                            | -2.08494300 | -2.07979500           | -0.31984000        |
| 29 | H                                            | -2.63786000 | -3.02321900           | -0.39409200        |
| 30 | H                                            | -1.22013100 | -2.16408300           | -0.99160100        |
| 31 | C                                            | -1.64325900 | -0.22919700           | 1.28146500         |
| 32 | H                                            | -1.94786700 | 0.03532000            | 2.30012900         |
| 33 | C                                            | -1.59627600 | -1.79412700           | 1.12433500         |
| 34 | H                                            | -2.32959300 | -2.22108400           | 1.82337000         |
| 35 | O                                            | -0.32157500 | -2.31256900           | 1.42914500         |
| 36 | C                                            | 0.22615800  | 0.54647400            | -0.24258200        |

|    |   |             |             |             |
|----|---|-------------|-------------|-------------|
| 1  | C | 0.05123800  | 1.53216200  | 1.86744400  |
| 2  | C | 1.56403900  | 1.31464100  | -0.04076400 |
| 3  | H | -0.47069500 | 1.15983200  | -0.83412500 |
| 4  | H | 0.35785500  | -0.40287000 | -0.76801600 |
| 5  | C | 1.50743100  | 1.76959900  | 1.45670700  |
| 6  | H | -0.58184400 | 2.39095400  | 1.57601200  |
| 7  | H | -0.07637000 | 1.36809200  | 2.94289200  |
| 8  | H | 1.54889600  | 2.20445300  | -0.67932000 |
| 9  | H | 2.16707900  | 1.13820400  | 2.05967900  |
| 10 | N | -0.28440000 | 0.31760000  | 1.11969000  |
| 11 | C | 2.82248300  | 0.53183500  | -0.37334900 |
| 12 | C | 3.91487000  | 1.18279600  | -0.96131000 |
| 13 | C | 2.94615900  | -0.83359500 | -0.07392300 |
| 14 | C | 5.09958600  | 0.49836700  | -1.23818500 |
| 15 | H | 3.83494300  | 2.23973800  | -1.20790700 |
| 16 | C | 4.12735900  | -1.52154000 | -0.35240300 |
| 17 | H | 2.11022500  | -1.37235000 | 0.36474800  |
| 18 | C | 5.21041600  | -0.85842400 | -0.93309700 |
| 19 | H | 5.93235400  | 1.02507400  | -1.69736500 |
| 20 | H | 4.19909900  | -2.58019000 | -0.11672700 |
| 21 | H | 6.12940500  | -1.39617300 | -1.15056700 |
| 22 | H | 1.82404100  | 2.80881000  | 1.58752600  |

23

24 **aniline<sub>4</sub>**

25 Zero-point correction= 0.475228 (Hartree/Particle)

26 Thermal correction to Energy= 0.503232

27 Thermal correction to Enthalpy= 0.504176

28 Thermal correction to Gibbs Free Energy= 0.407126

29 Sum of electronic and zero-point Energies= -1149.968502

30 Sum of electronic and thermal Energies= -1149.940498

31 Sum of electronic and thermal Enthalpies= -1149.939554

32 Sum of electronic and thermal Free Energies= -1150.036604

33

Cartesian Coordinates

| 34 | Atom  | X          | Y           | Z          |
|----|-------|------------|-------------|------------|
| 35 | ----- |            |             |            |
| 36 | H     | 1.03898500 | -2.83988400 | 1.22356300 |

|    |   |             |             |             |
|----|---|-------------|-------------|-------------|
| 1  | H | -0.02451800 | -1.54730800 | 1.09076000  |
| 2  | H | 1.96157900  | -0.86781700 | -0.15837300 |
| 3  | N | 0.58815700  | -2.19583200 | 0.58079500  |
| 4  | C | -0.02415900 | -2.84645800 | -0.51077700 |
| 5  | C | 0.53064300  | -4.02269800 | -1.04079200 |
| 6  | C | -0.03503200 | -4.62850700 | -2.16102100 |
| 7  | C | -1.15808400 | -4.07432300 | -2.77912200 |
| 8  | C | -1.71255900 | -2.90580900 | -2.25315200 |
| 9  | C | -1.15788900 | -2.29429100 | -1.12939600 |
| 10 | H | 1.41098400  | -4.45749900 | -0.57137000 |
| 11 | H | 0.40784200  | -5.54098100 | -2.55258400 |
| 12 | H | -1.59678000 | -4.54871900 | -3.65213700 |
| 13 | H | -2.59434200 | -2.46668400 | -2.71305000 |
| 14 | H | -1.61260000 | -1.39807000 | -0.71539600 |
| 15 | C | 3.73342800  | 0.12455600  | 0.17089900  |
| 16 | C | 4.86102700  | 0.67175600  | -0.46315300 |
| 17 | C | 3.79446200  | -0.12669500 | 1.55245200  |
| 18 | C | 6.01398100  | 0.95703100  | 0.26586100  |
| 19 | H | 4.82756700  | 0.87374500  | -1.53189200 |
| 20 | C | 4.95223400  | 0.16062800  | 2.27262700  |
| 21 | H | 2.92707900  | -0.54976200 | 2.05362500  |
| 22 | C | 6.07103800  | 0.70496600  | 1.63817200  |
| 23 | H | 6.87563500  | 1.37772200  | -0.24652100 |
| 24 | H | 4.97932100  | -0.04577200 | 3.33988100  |
| 25 | H | 6.97185500  | 0.92686700  | 2.20275800  |
| 26 | N | 2.54212900  | -0.10901100 | -0.53964600 |
| 27 | H | 2.68799600  | -0.24111200 | -1.53562800 |
| 28 | H | 0.96910000  | 2.85383100  | 0.62802300  |
| 29 | H | 1.19585100  | 1.40533800  | -0.17508100 |
| 30 | N | 0.50413500  | 2.10630100  | 0.12140800  |
| 31 | C | -0.30825100 | 2.58244000  | -0.92628100 |
| 32 | C | -0.81867400 | 3.89073300  | -0.91122400 |
| 33 | C | -1.66732100 | 4.33139100  | -1.92513000 |
| 34 | C | -2.02513200 | 3.48223200  | -2.97425400 |
| 35 | C | -1.52168300 | 2.17966000  | -2.99206000 |
| 36 | C | -0.67387700 | 1.72822600  | -1.98163400 |

|    |   |             |             |             |
|----|---|-------------|-------------|-------------|
| 1  | H | -0.54647400 | 4.56146200  | -0.09863200 |
| 2  | H | -2.04817100 | 5.34920100  | -1.89408900 |
| 3  | H | -2.68488800 | 3.82941800  | -3.76403300 |
| 4  | H | -1.78852000 | 1.50387200  | -3.80084400 |
| 5  | H | -0.29319900 | 0.70995200  | -2.00219900 |
| 6  | H | -0.43880800 | 0.14440600  | 2.97398300  |
| 7  | C | -2.29893300 | 0.09630500  | 2.16310500  |
| 8  | C | -3.08910800 | 0.59463300  | 1.11402300  |
| 9  | C | -2.93517700 | -0.46189800 | 3.28327200  |
| 10 | C | -4.47967200 | 0.52744100  | 1.19009000  |
| 11 | H | -2.61033100 | 1.04214300  | 0.24657200  |
| 12 | C | -4.32586000 | -0.52134000 | 3.35020800  |
| 13 | H | -2.33303800 | -0.85337300 | 4.10117500  |
| 14 | C | -5.10993000 | -0.02934100 | 2.30471900  |
| 15 | H | -5.07355800 | 0.92220800  | 0.36952700  |
| 16 | H | -4.79806900 | -0.95550200 | 4.22806100  |
| 17 | H | -6.19365800 | -0.07671500 | 2.35944000  |
| 18 | N | -0.89081000 | 0.10204100  | 2.06501700  |
| 19 | H | -0.51495800 | 0.84070500  | 1.45684300  |
| 20 |   |             |             |             |
| 21 |   |             |             |             |

1 9. Copy of NMR and HPLC Spectra

2 e1

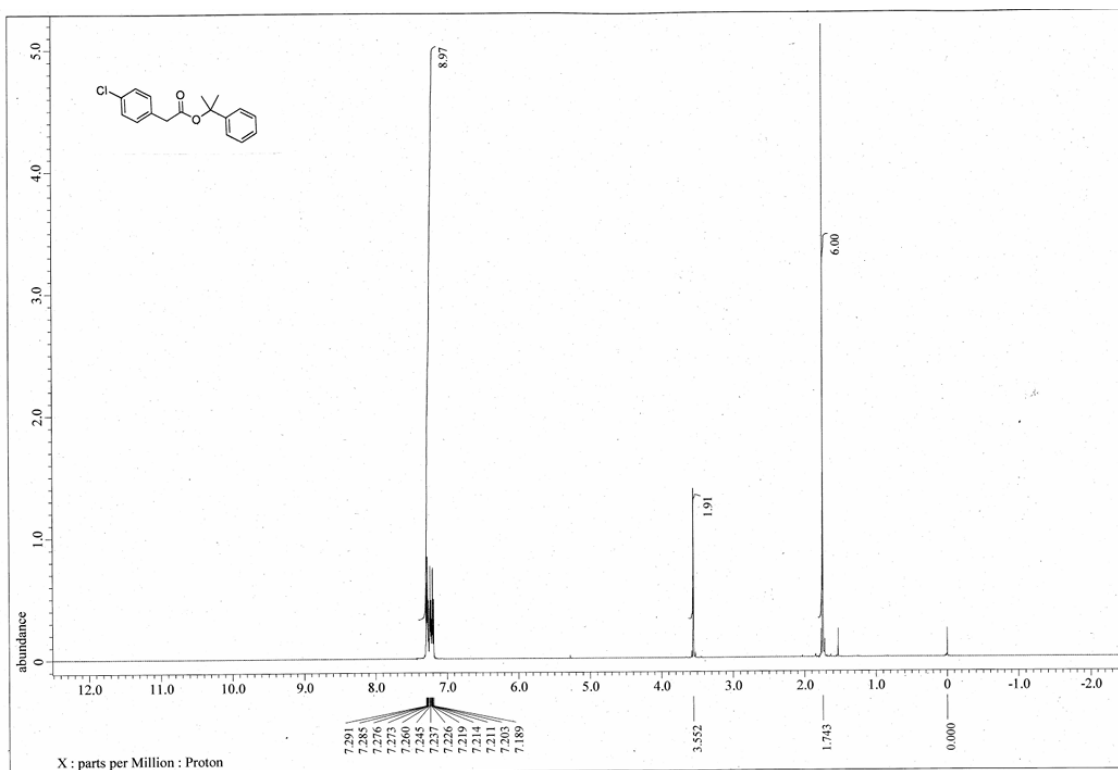

3

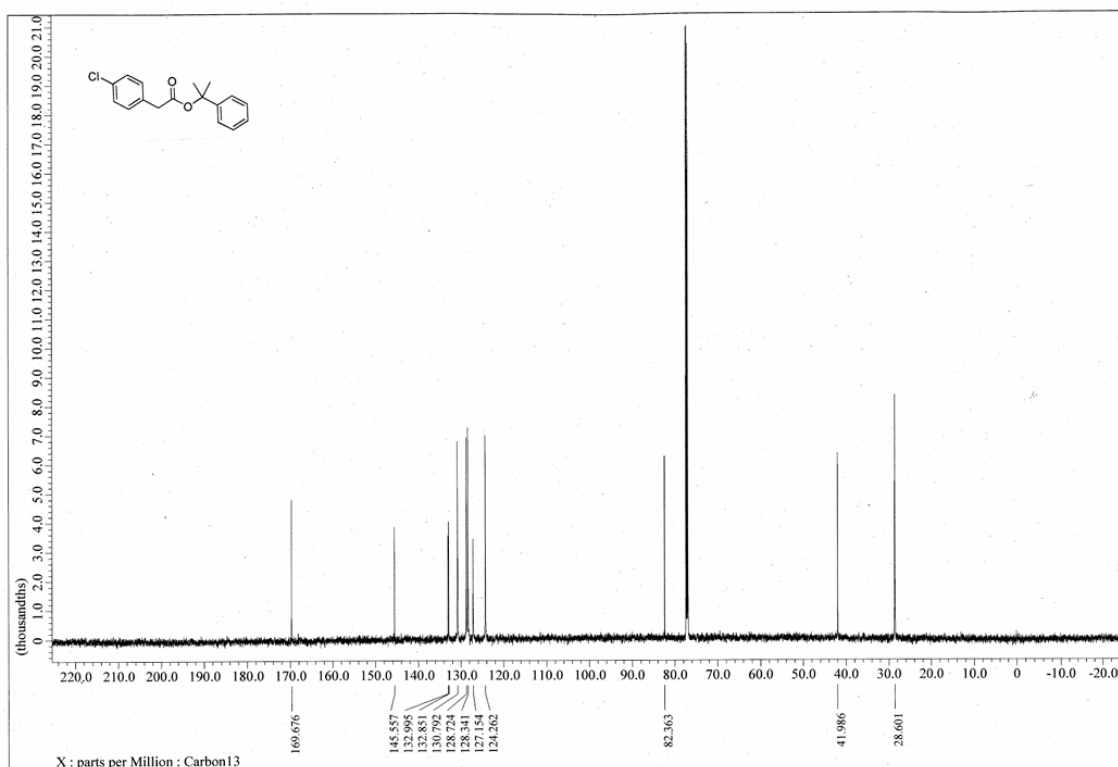

4

5

1

e2

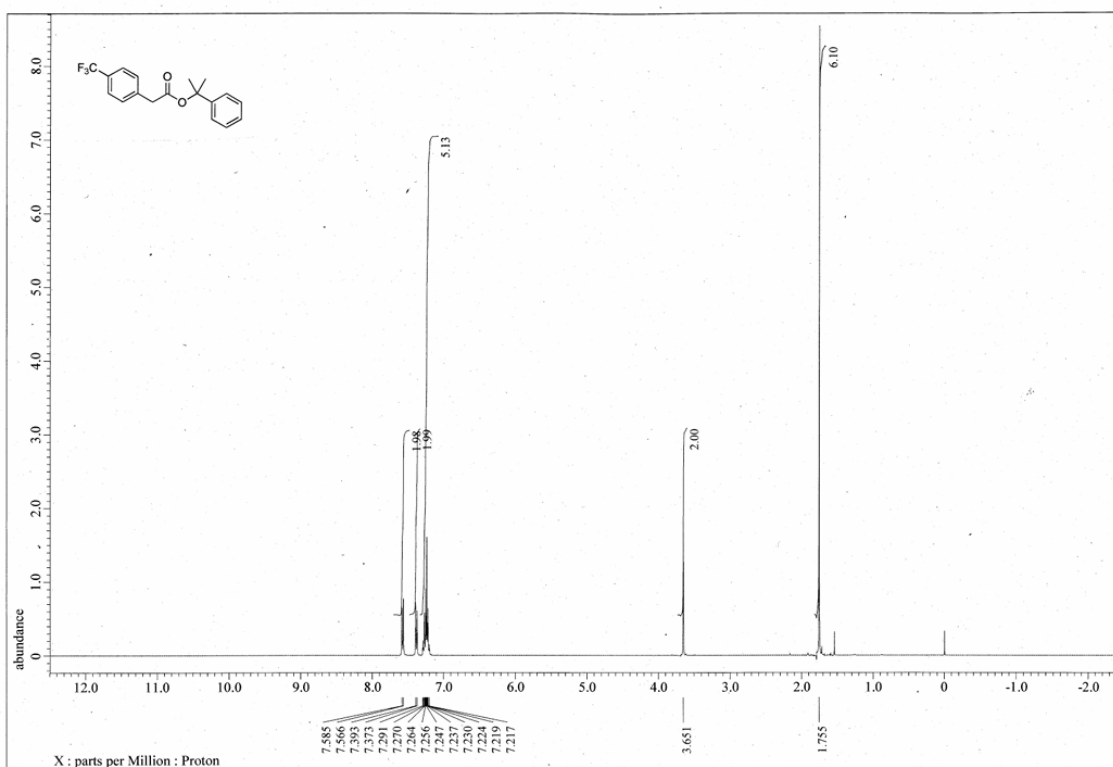

2

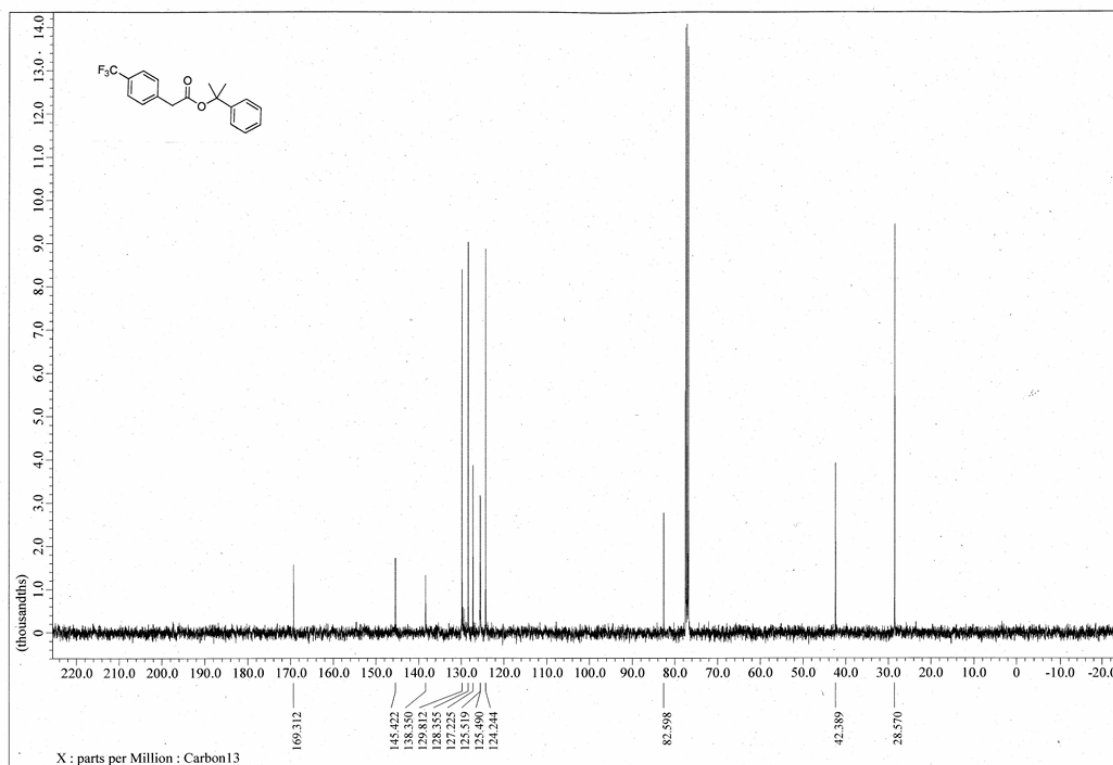

3

4

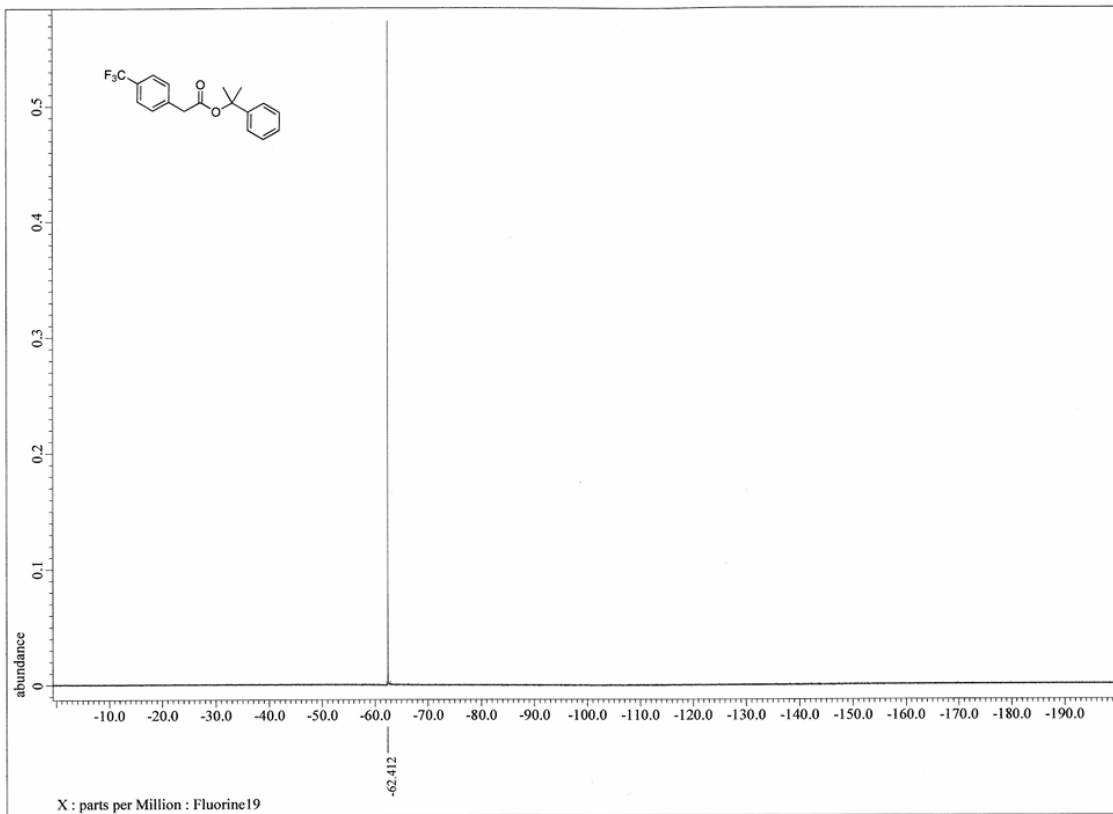

1

2

1

e3

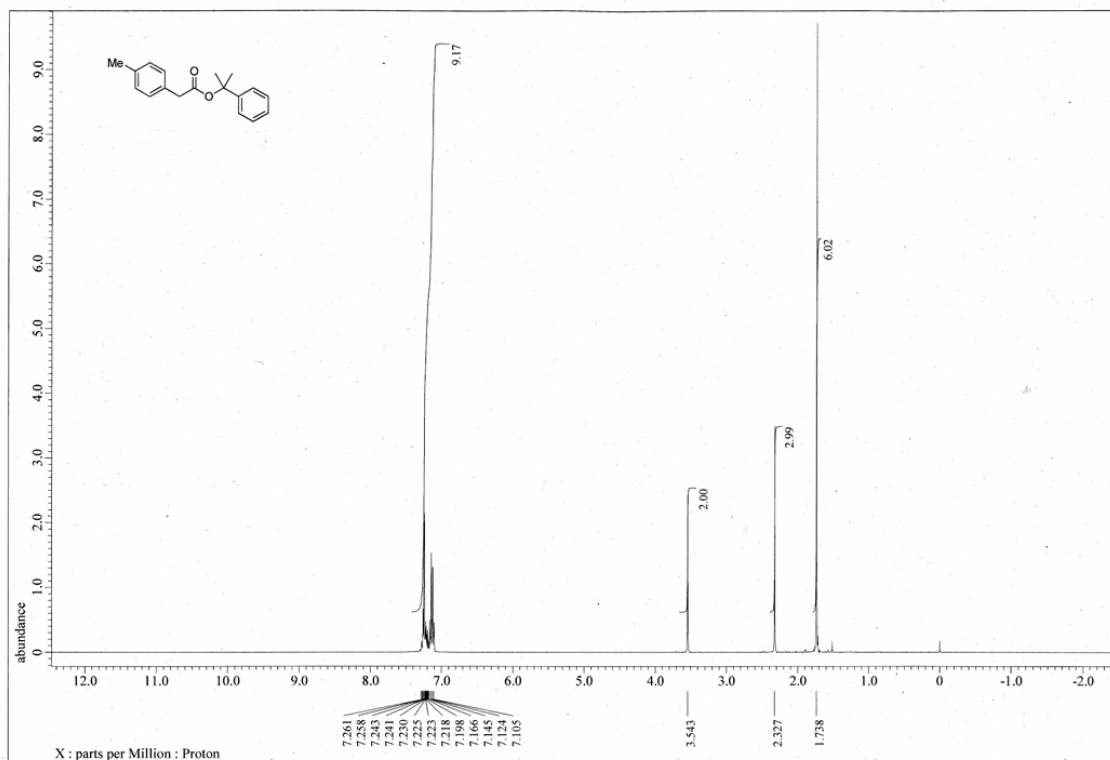

2

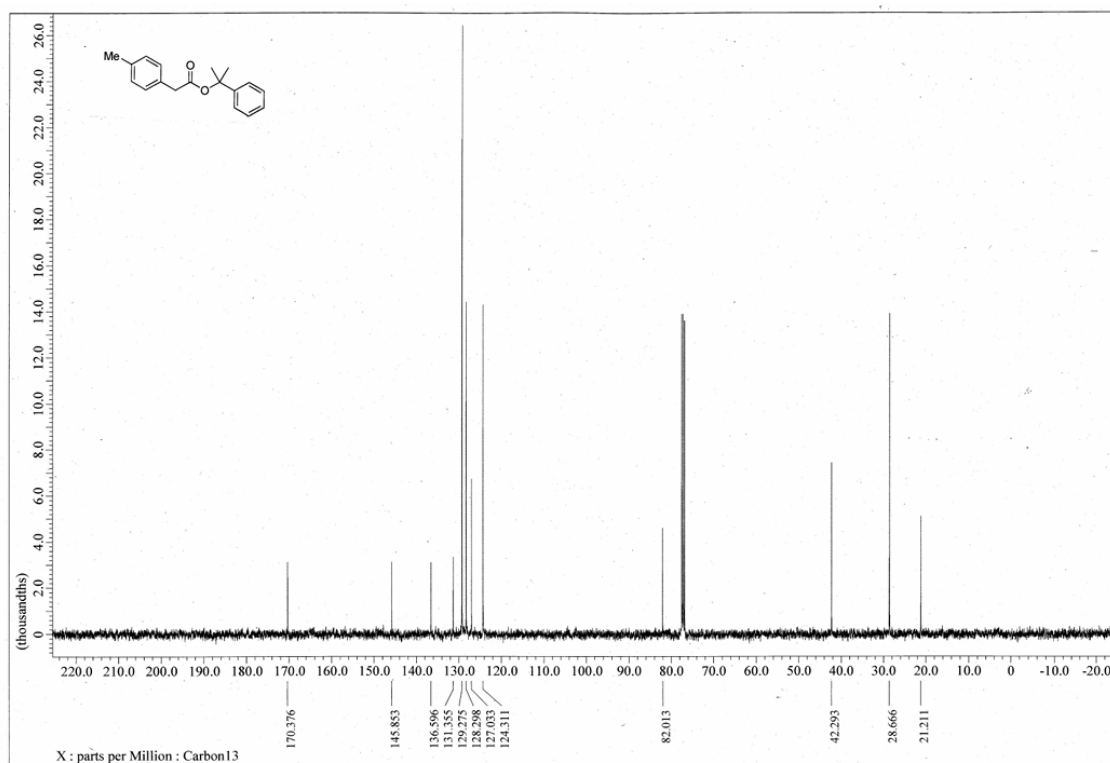

3

4

1

e4

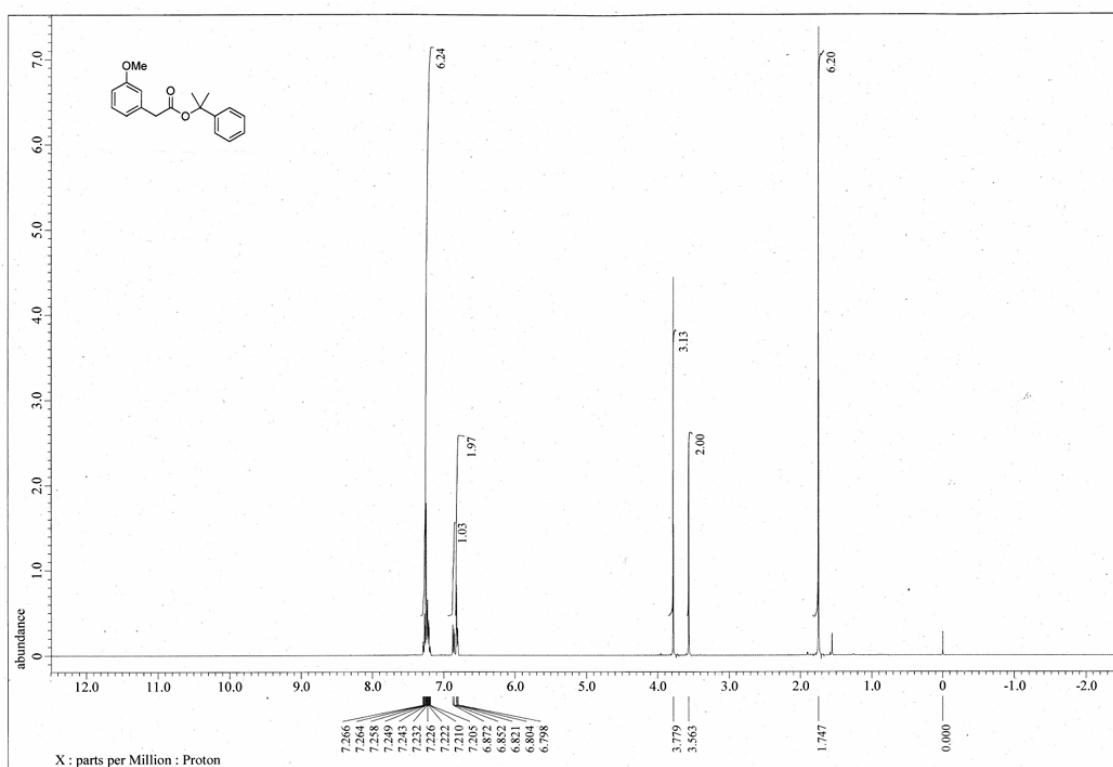

2

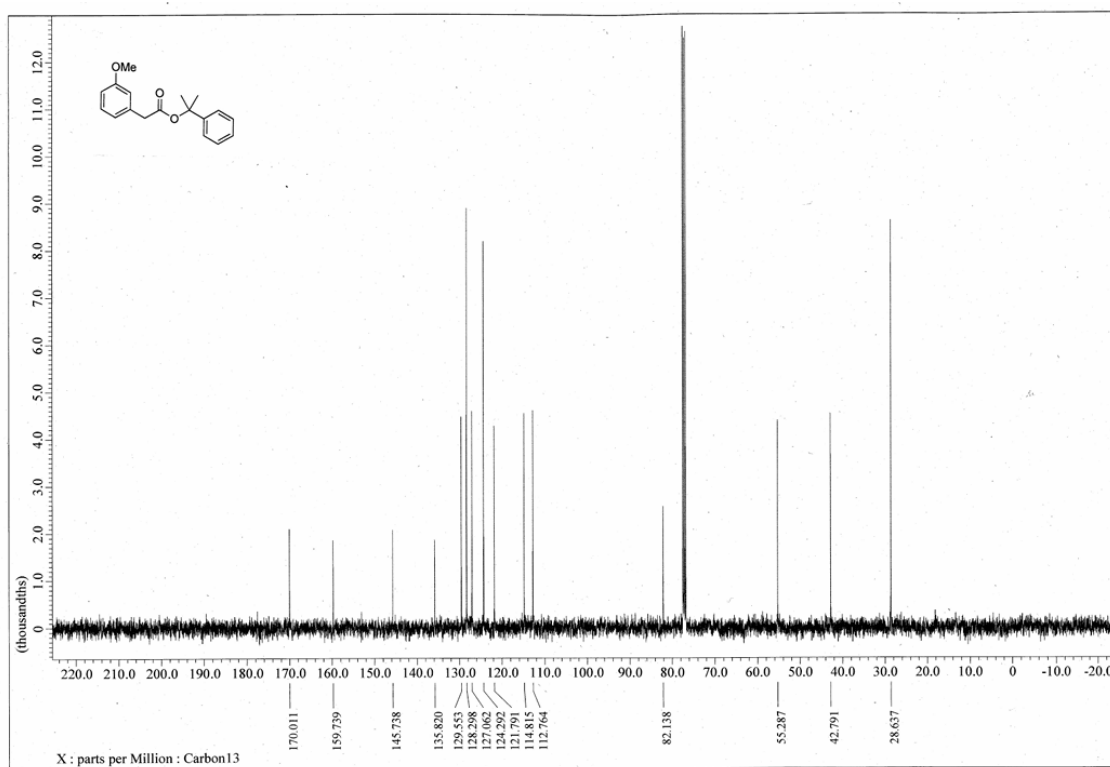

3

4

1

e5

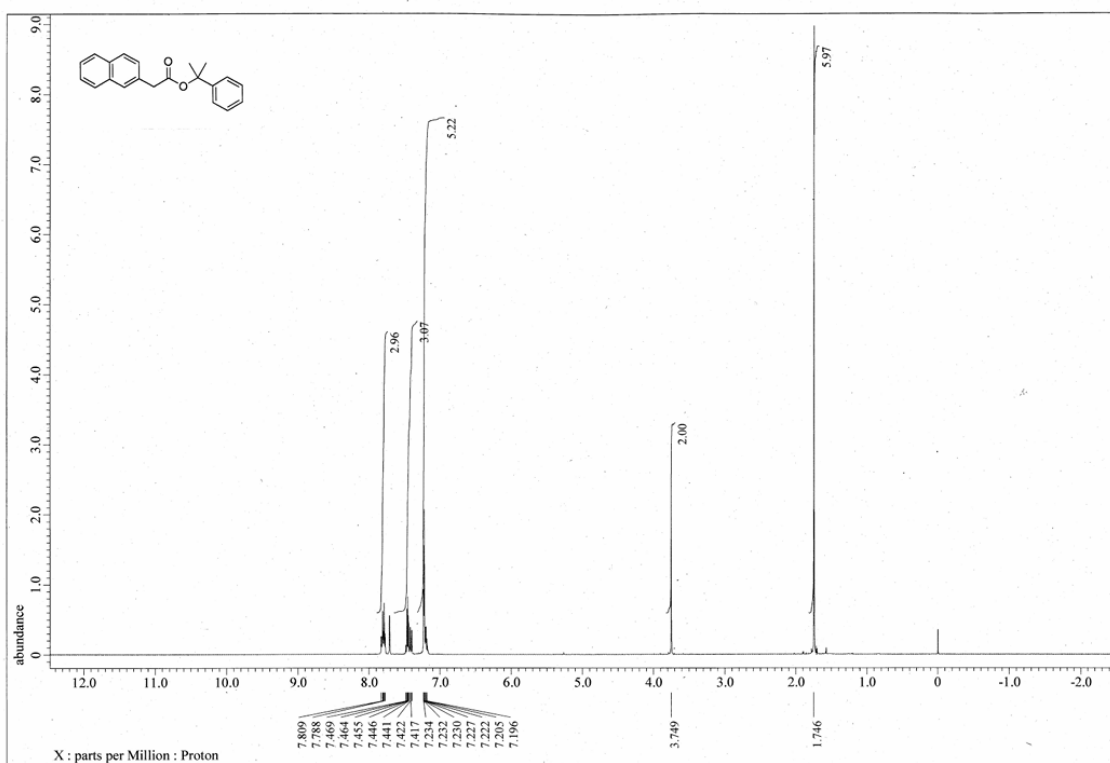

2

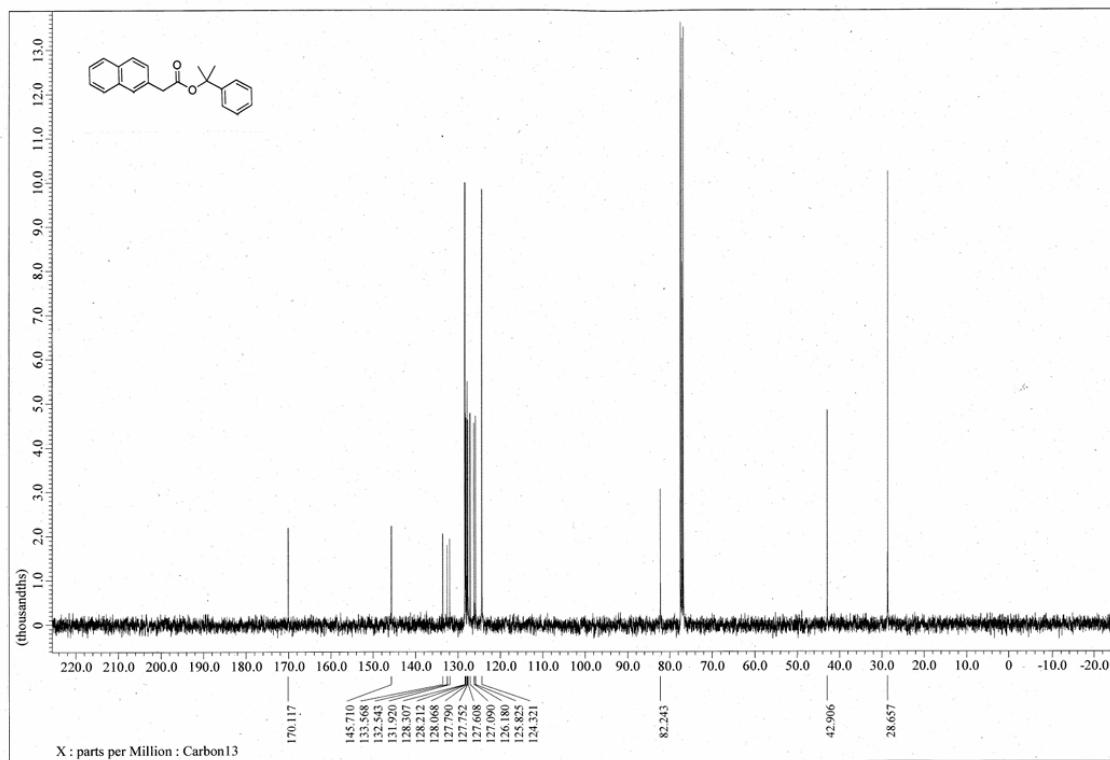

3

4

1

e6

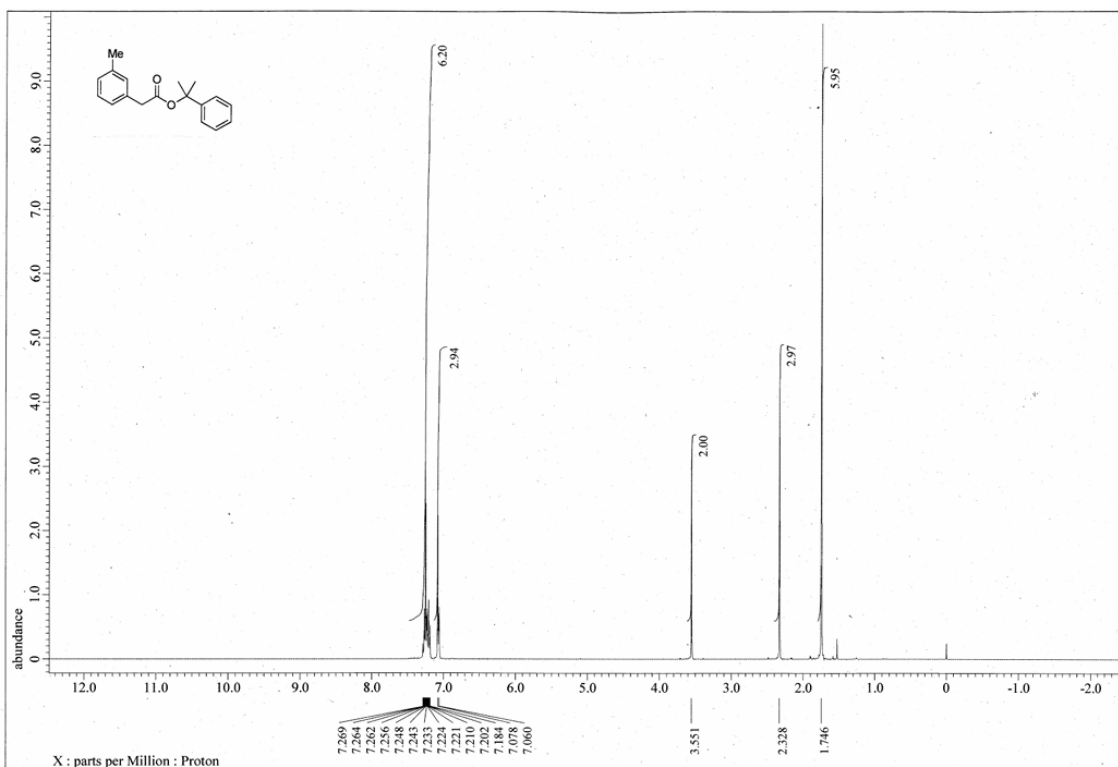

2

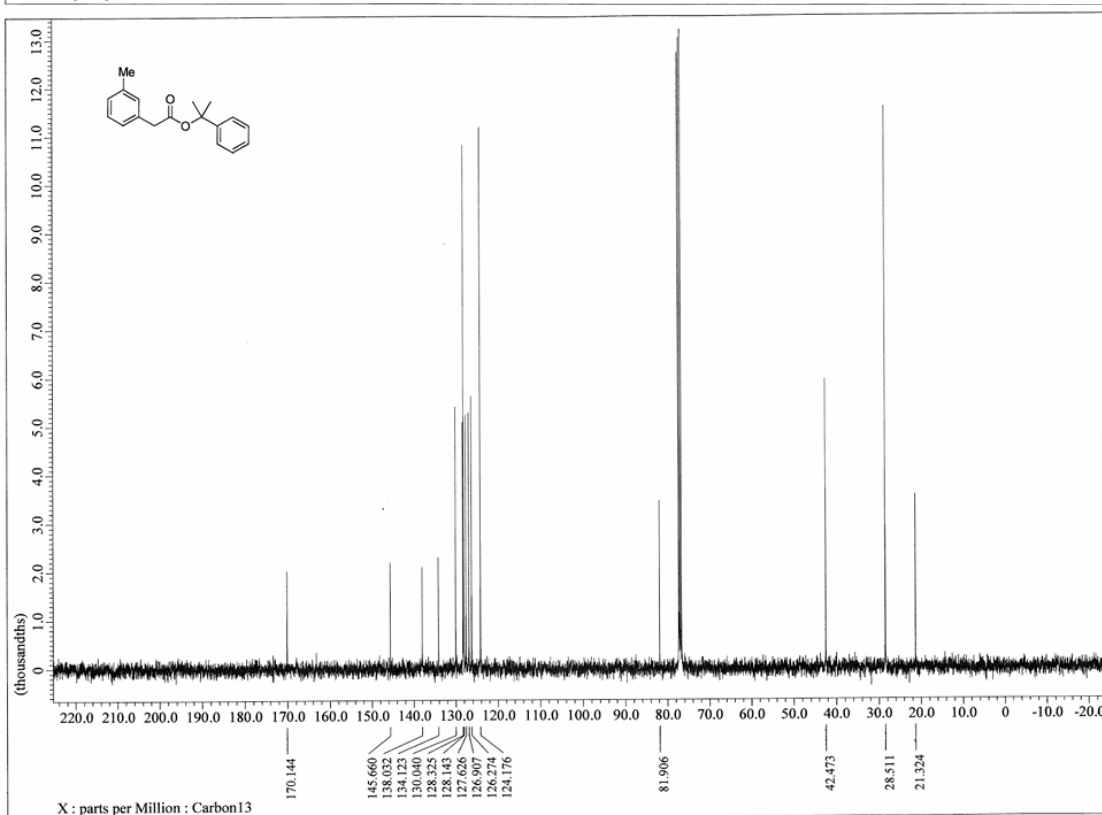

3

4

1

d1

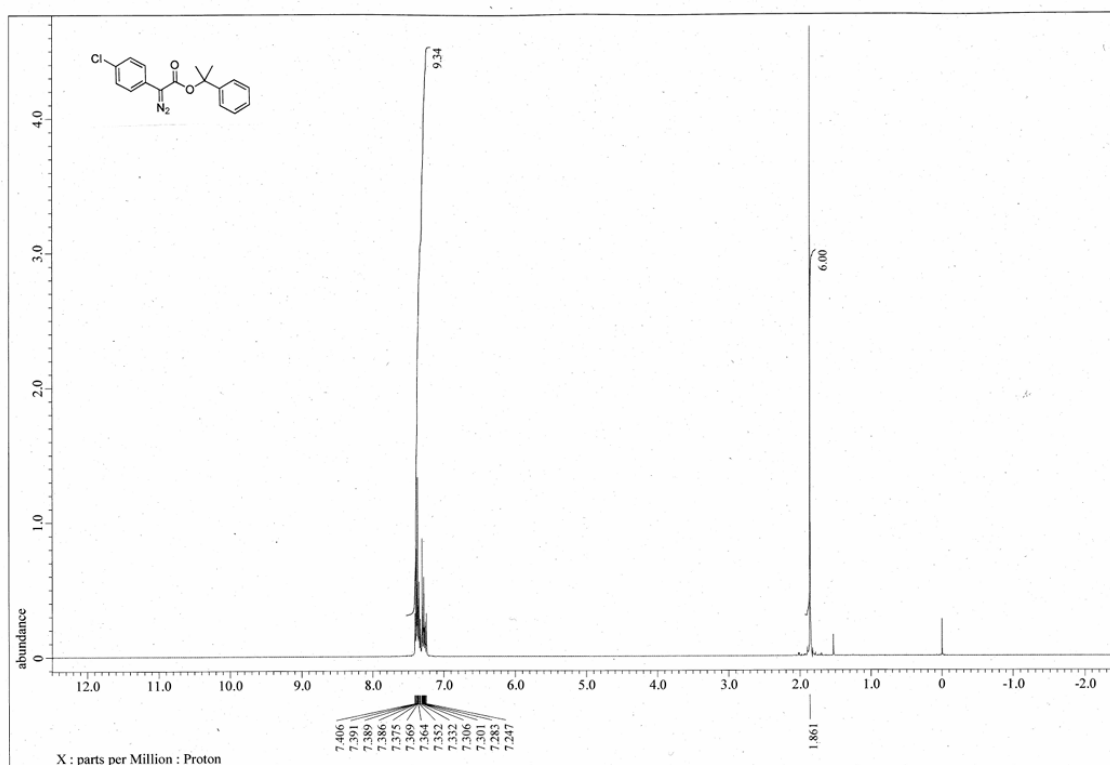

2

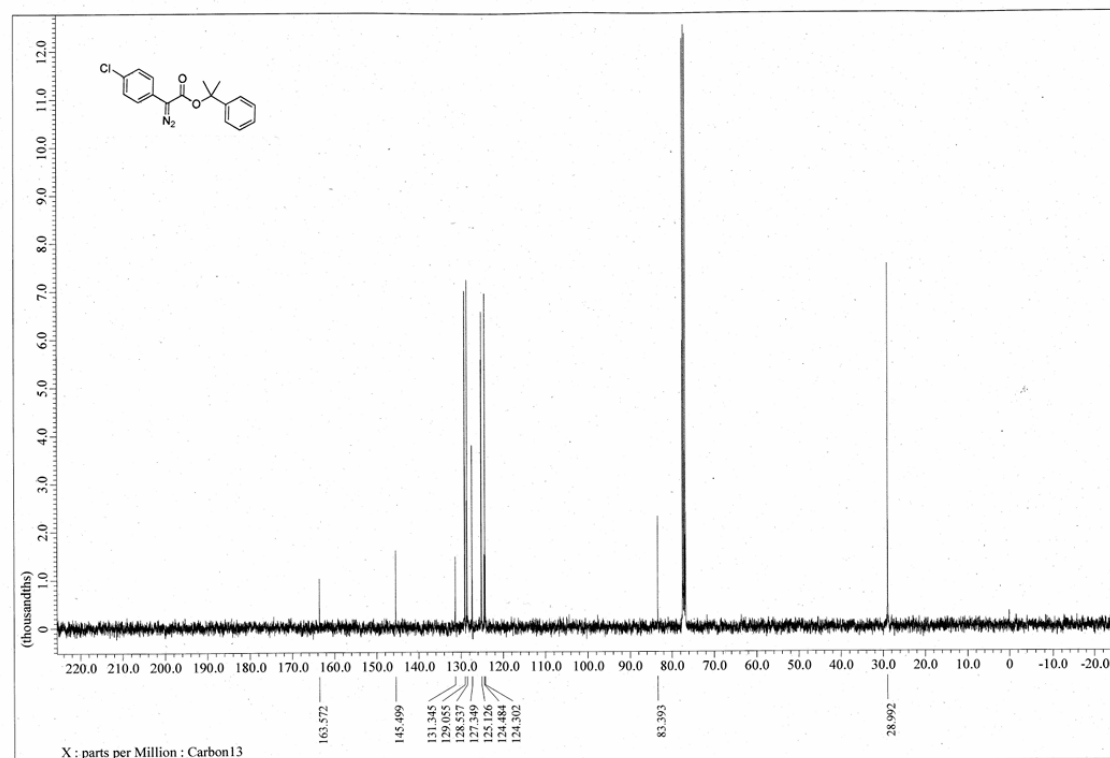

3

4

1

d2

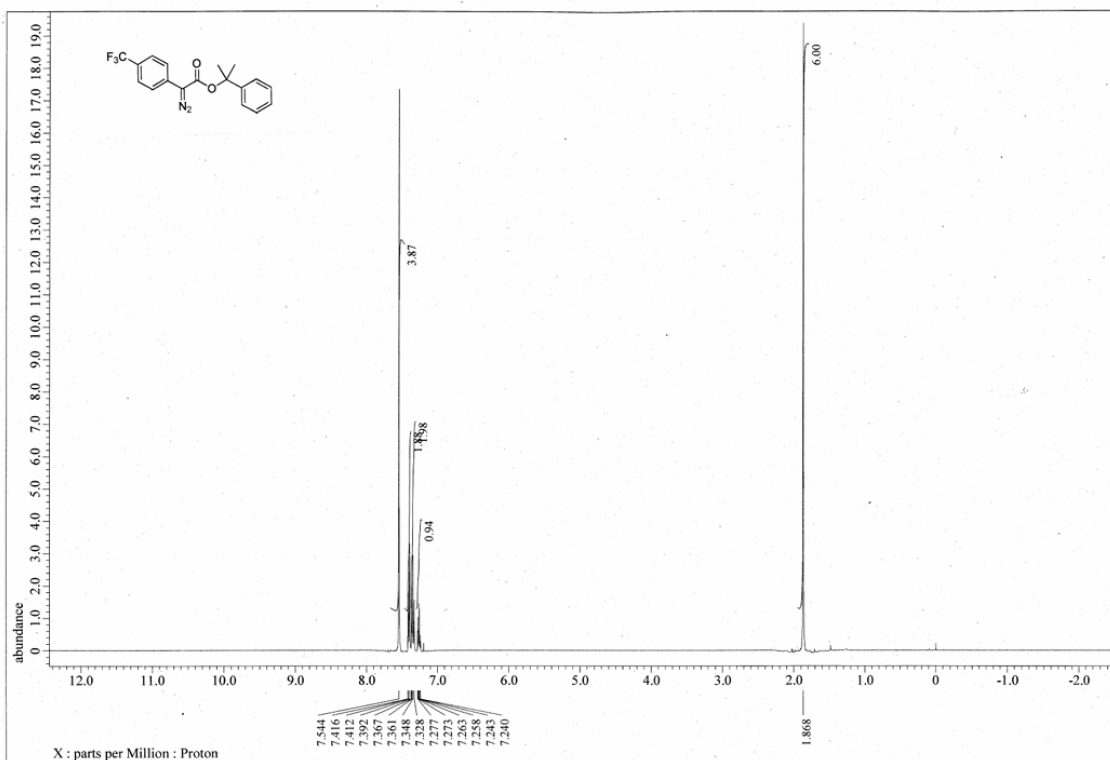

2

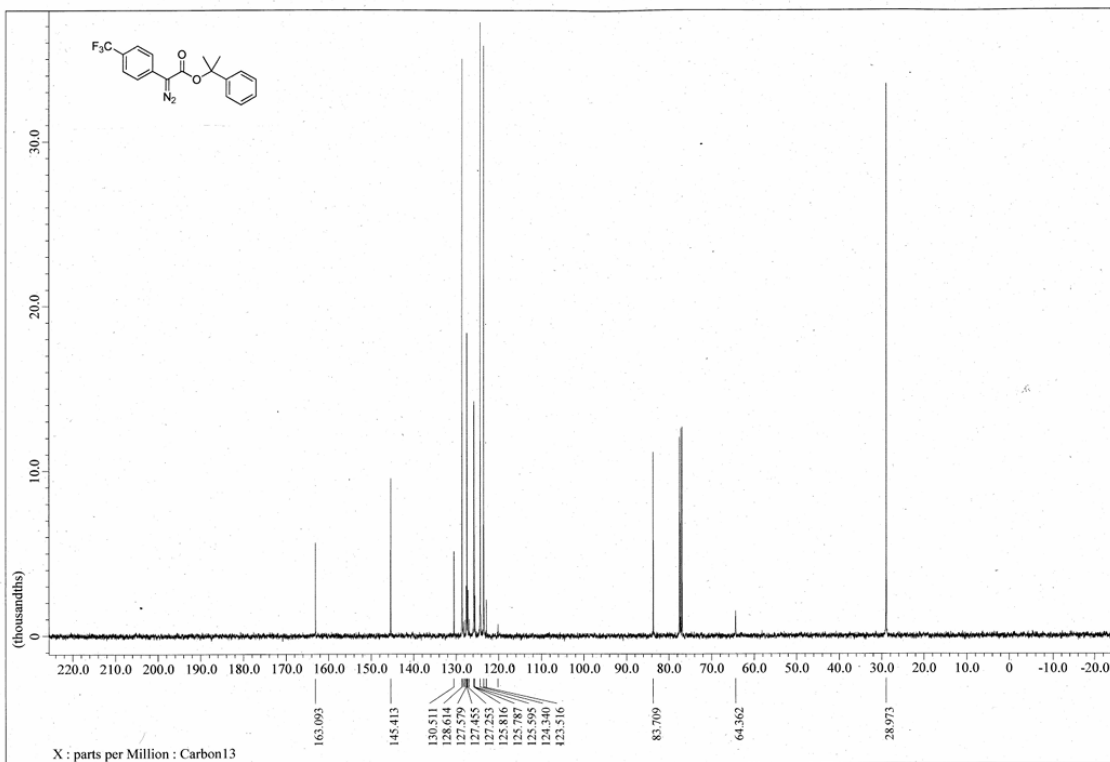

3

4

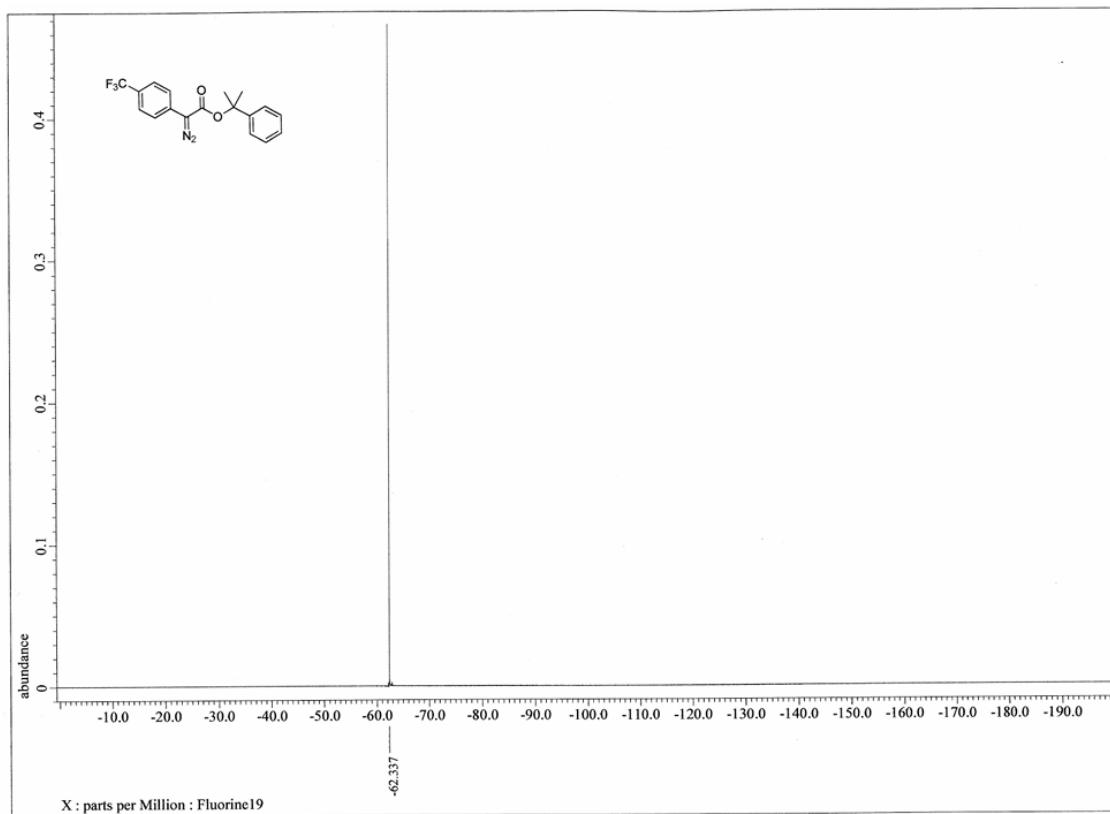

1

2

1

d4

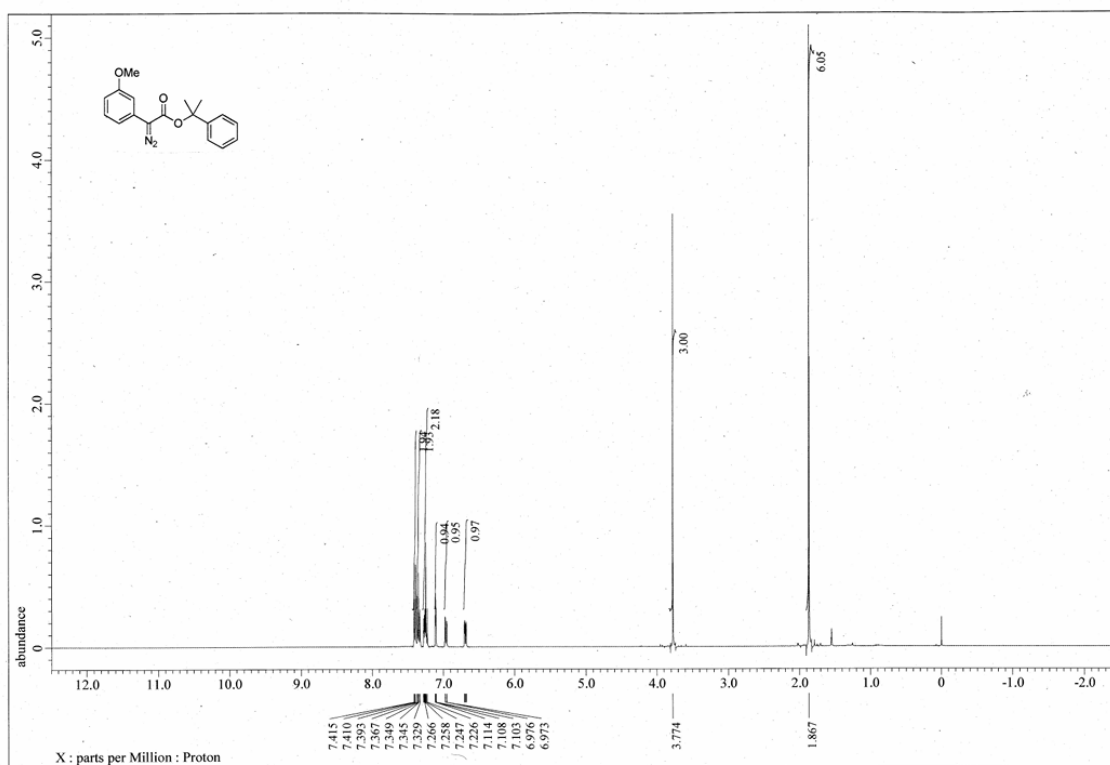

2

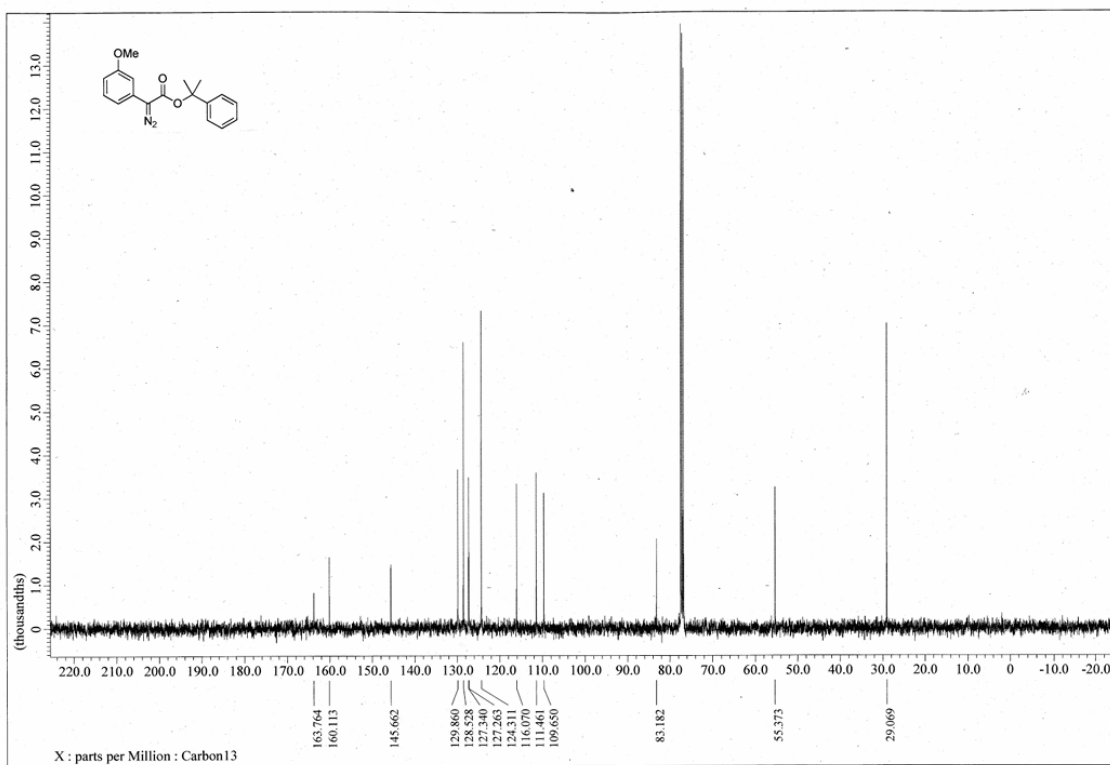

3

4

1

d5

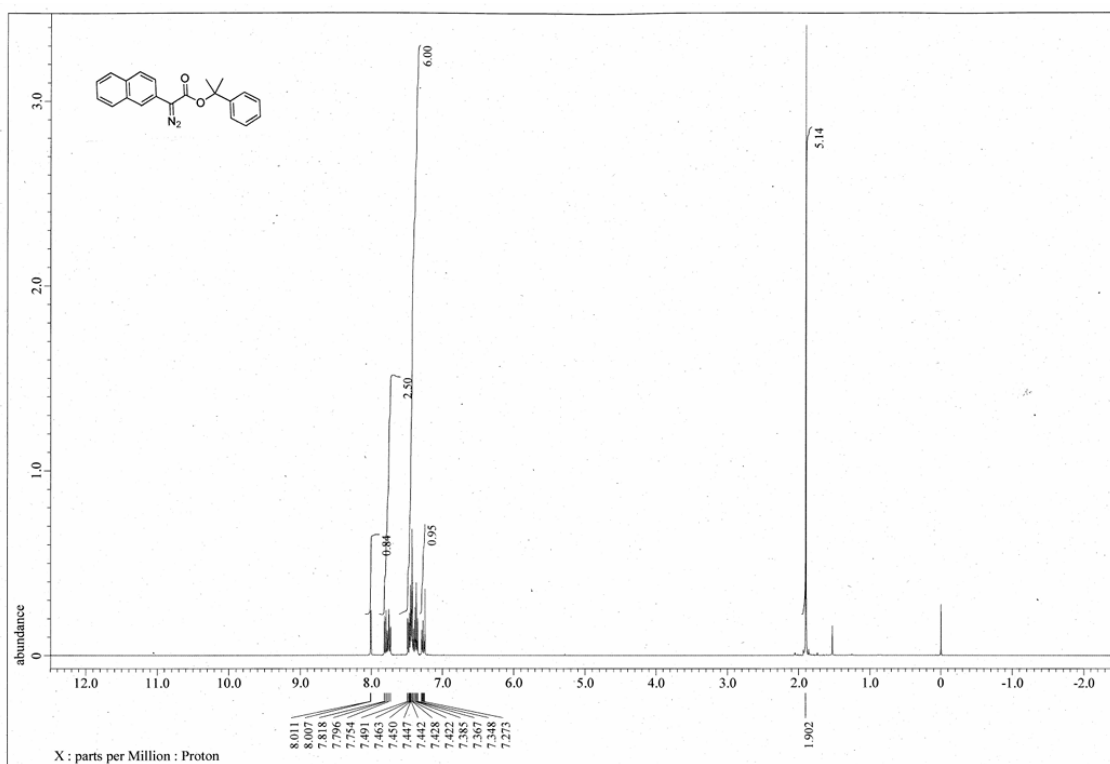

2

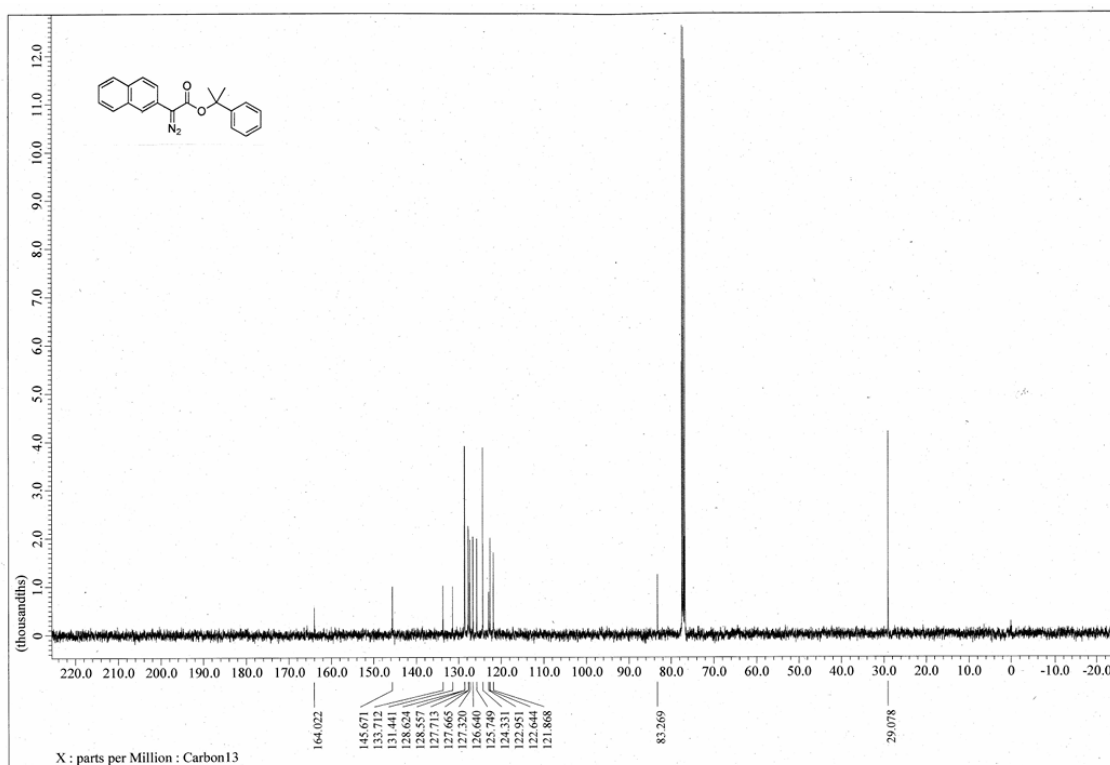

3

4

1  
2

3a

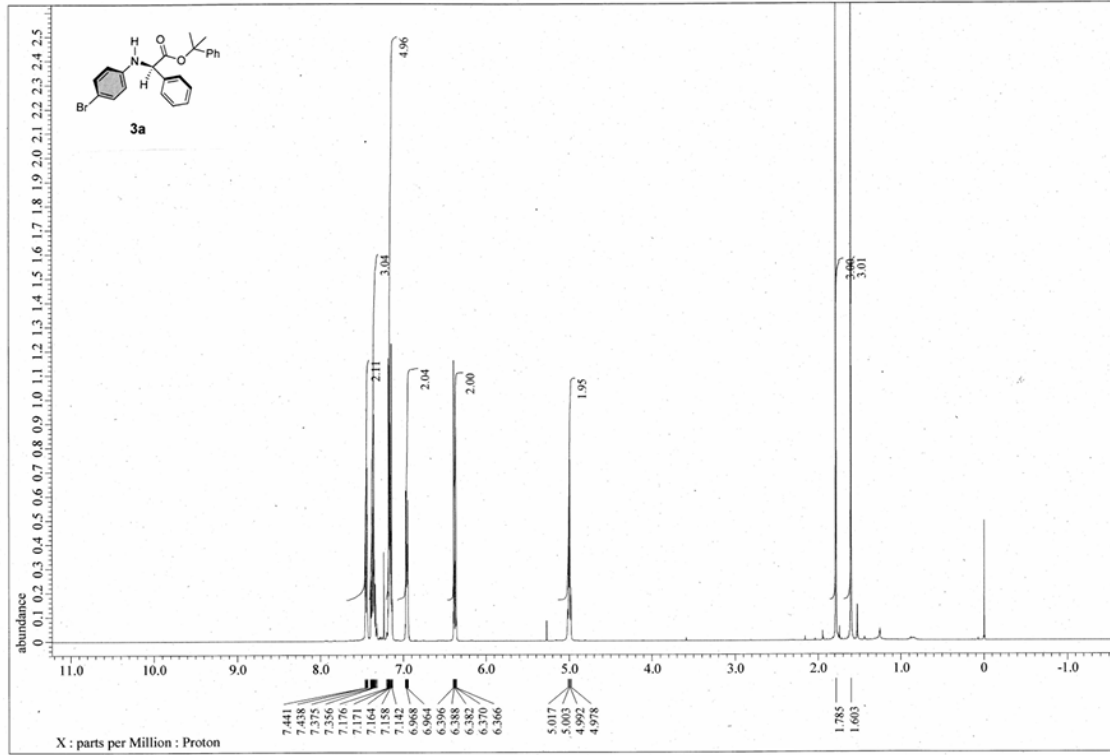

3

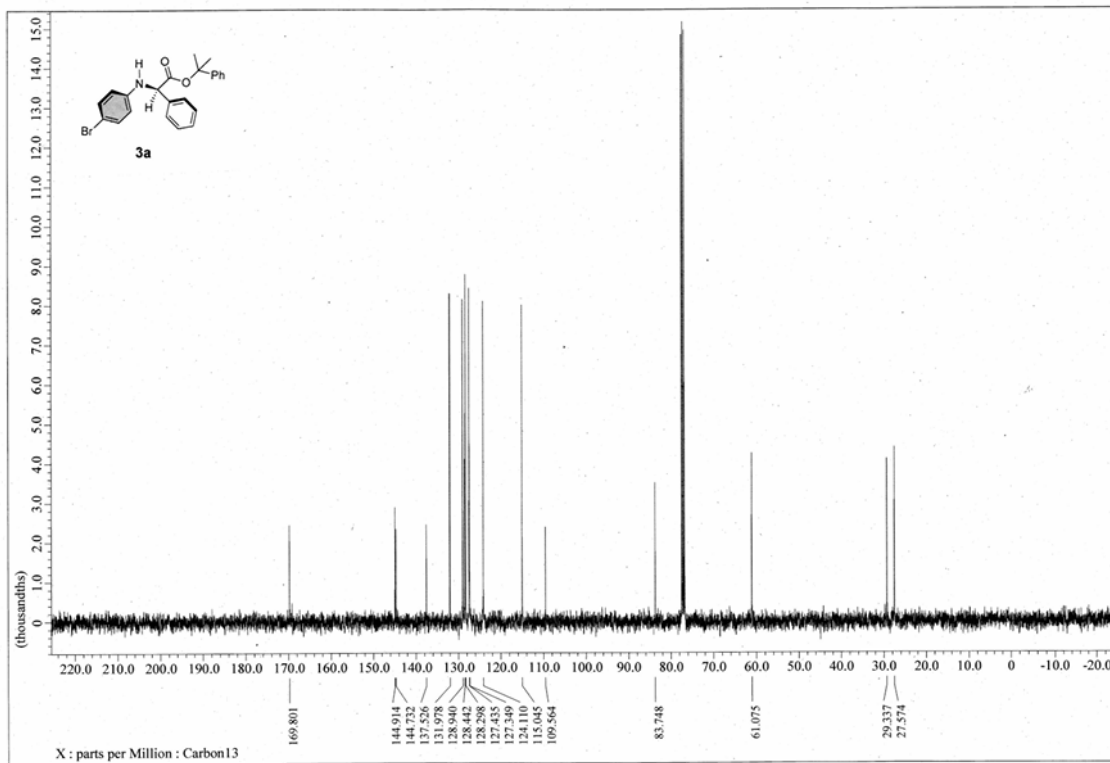

4

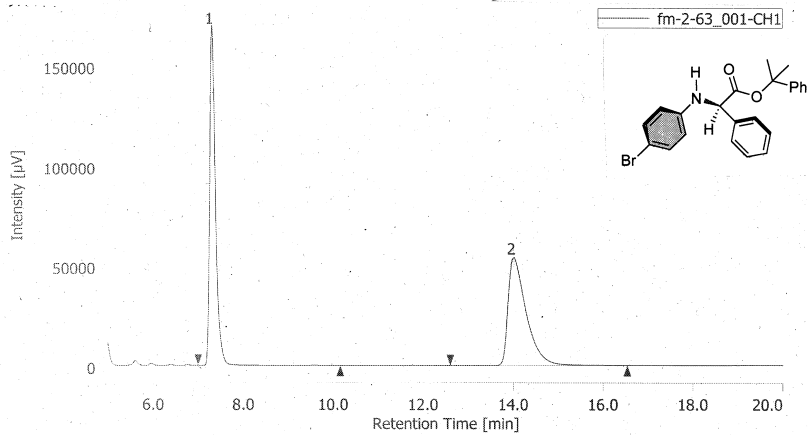

| # | tR [min] | Area [µV·sec] | Area%  | Height [µV] | Height% |
|---|----------|---------------|--------|-------------|---------|
| 1 | 7.317    | 1528404       | 50.375 | 170252      | 75.966  |
| 2 | 14.017   | 1505678       | 49.625 | 53884       | 24.034  |

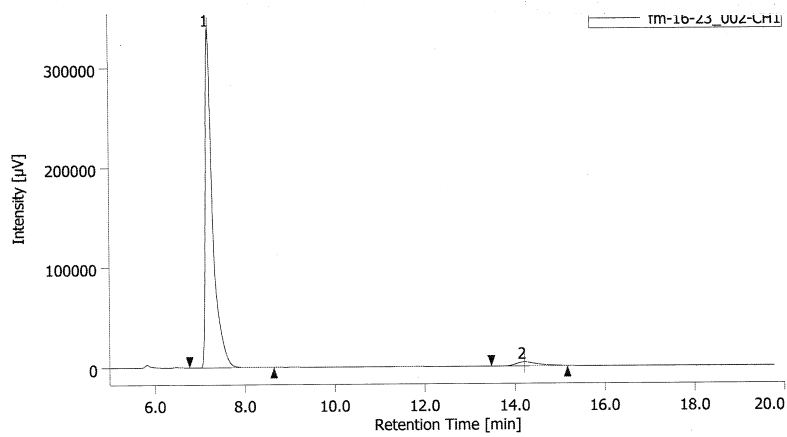

| # | tR [min] | Area [µV·sec] | Area%  | Height [µV] | Height% |
|---|----------|---------------|--------|-------------|---------|
| 1 | 7.208    | 3799117       | 96.691 | 340223      | 98.858  |
| 2 | 14.208   | 130007        | 3.309  | 3930        | 1.142   |

1  
2

1

3b

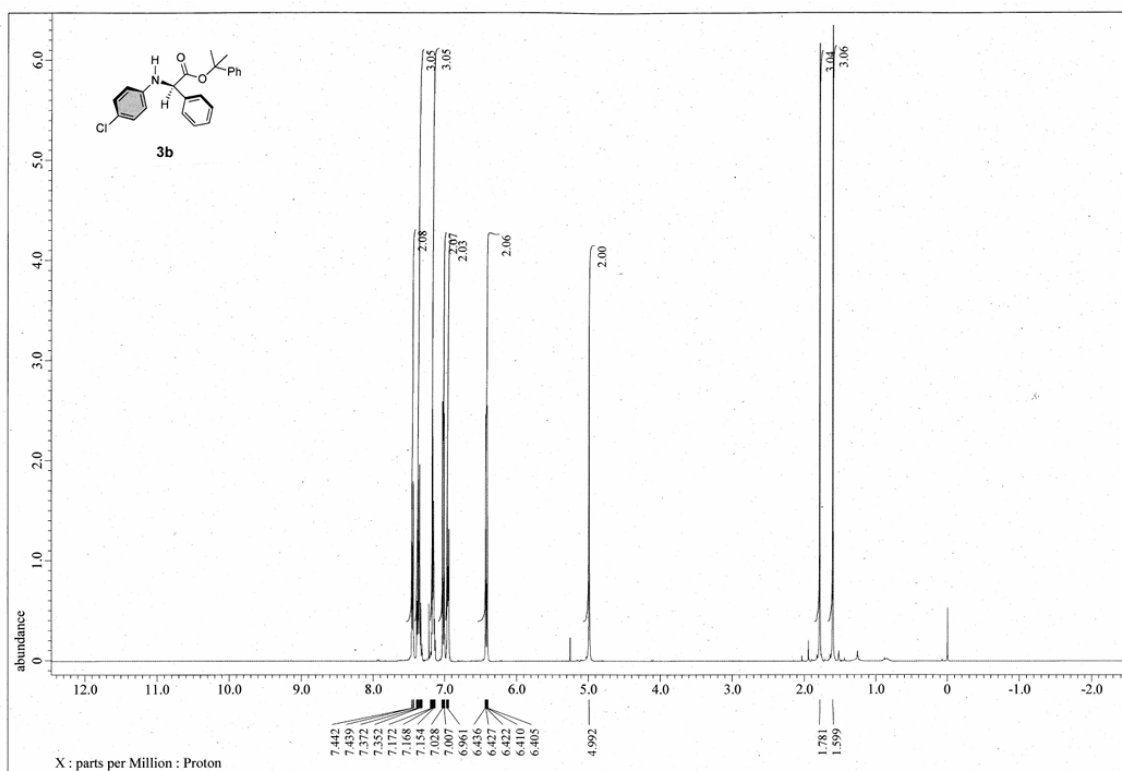

2

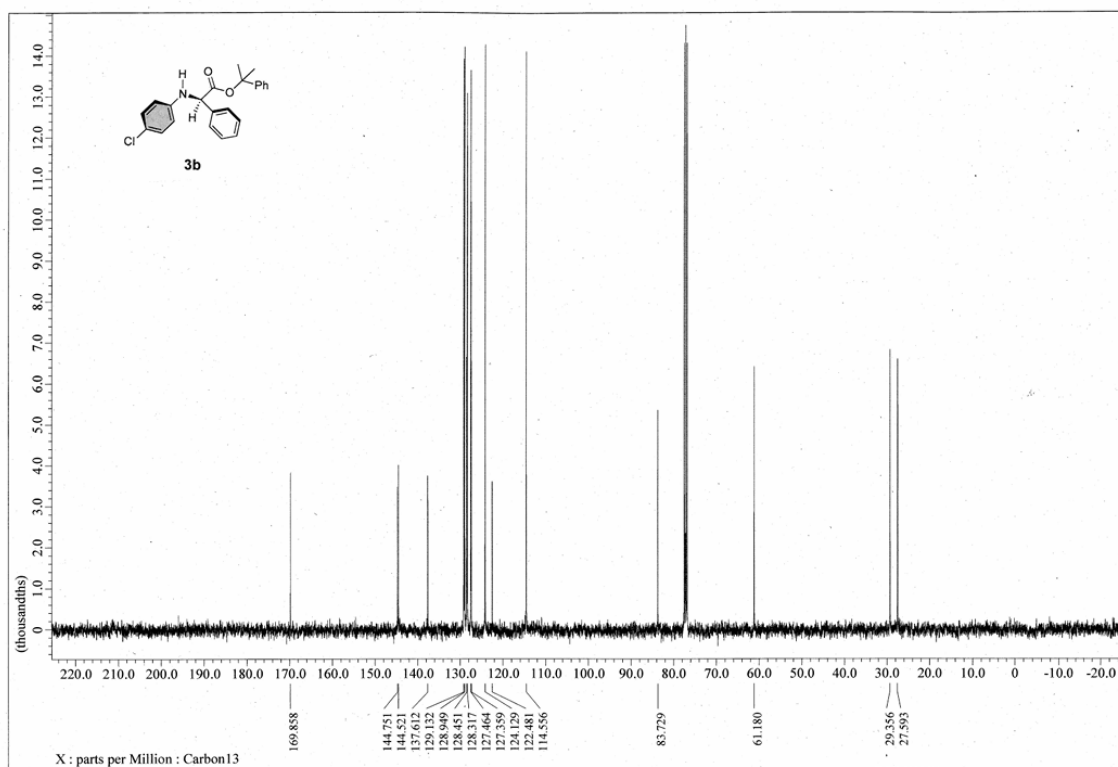

3

4

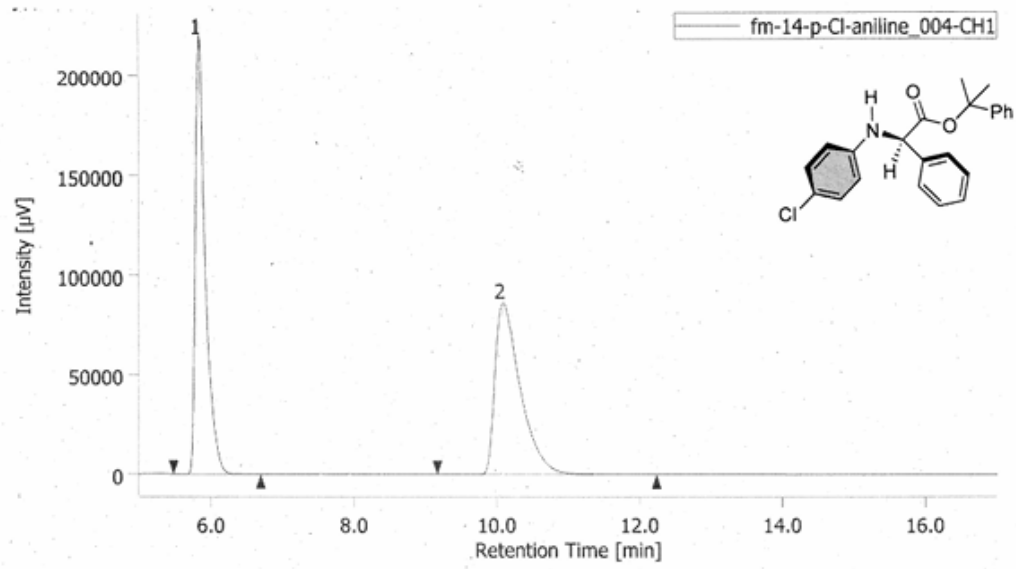

| # | tR [min] | Area [ $\mu\text{V}\cdot\text{sec}$ ] | Area%  | Height [ $\mu\text{V}$ ] | Height% |
|---|----------|---------------------------------------|--------|--------------------------|---------|
| 1 | 5.842    | 2130996                               | 50.098 | 220009                   | 71.734  |
| 2 | 10.092   | 2122625                               | 49.902 | 86694                    | 28.266  |

228 fm-15-p-Cl\_001 2025/03/13 12:55:28

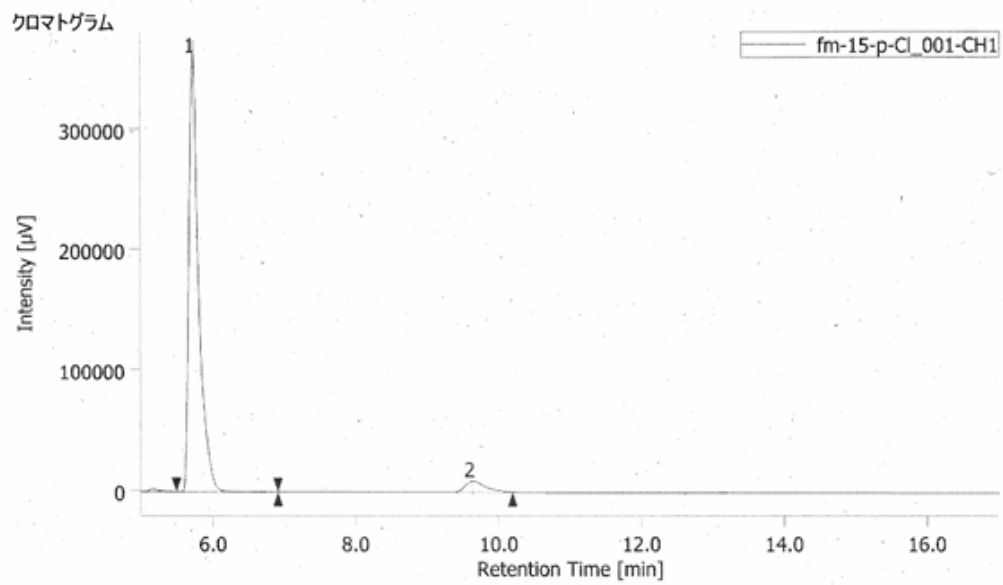

| # | tR [min] | Area [ $\mu\text{V}\cdot\text{sec}$ ] | Area%  | Height [ $\mu\text{V}$ ] | Height% |
|---|----------|---------------------------------------|--------|--------------------------|---------|
| 1 | 5.725    | 3404020                               | 94.989 | 362464                   | 97.533  |
| 2 | 9.642    | 179571                                | 5.011  | 9166                     | 2.467   |

1

3c

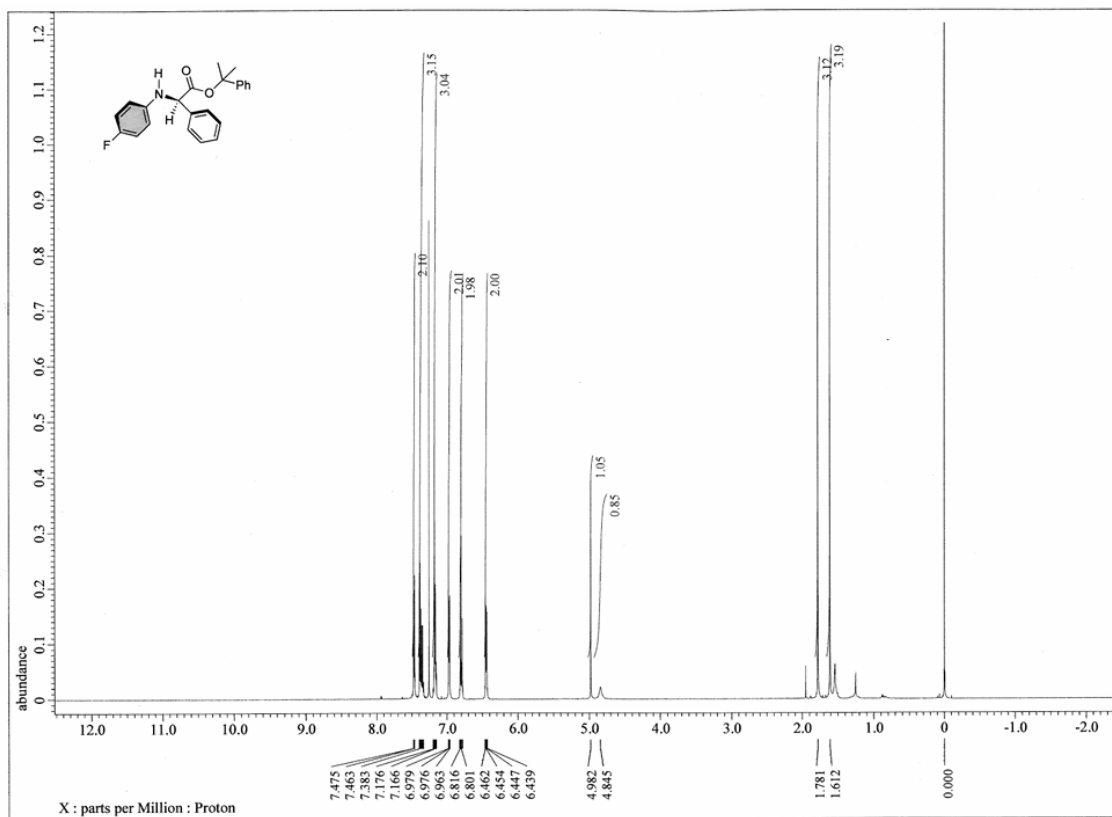

2

3

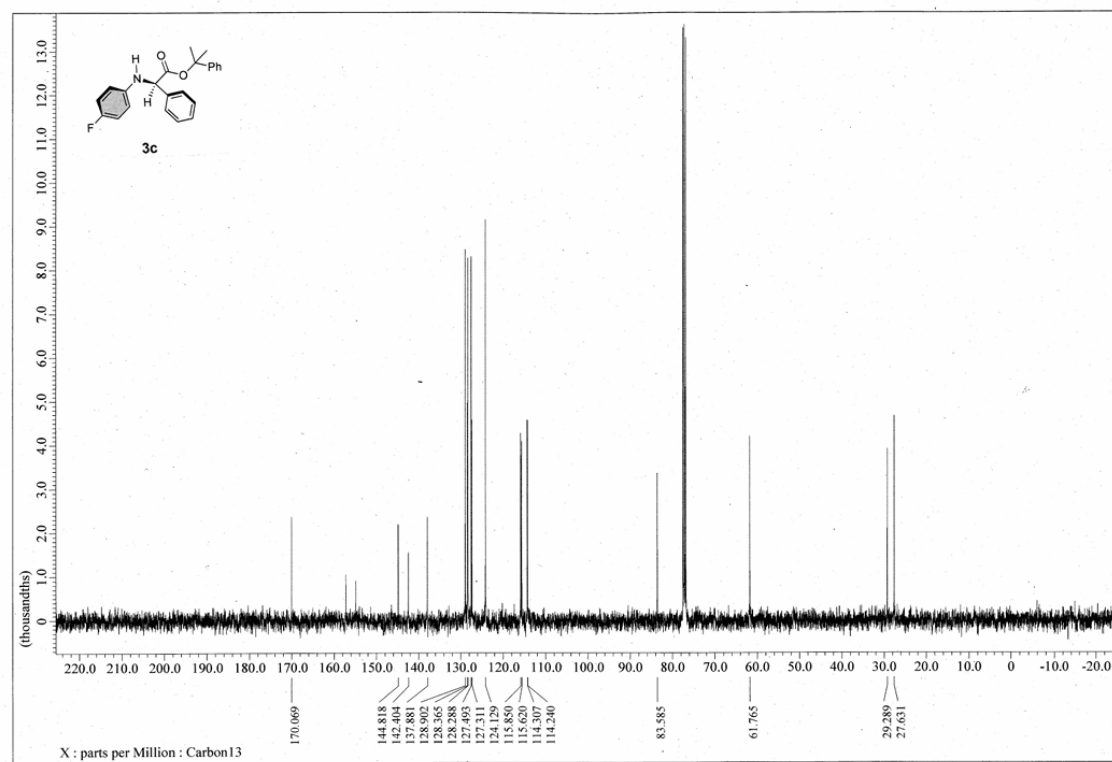

4

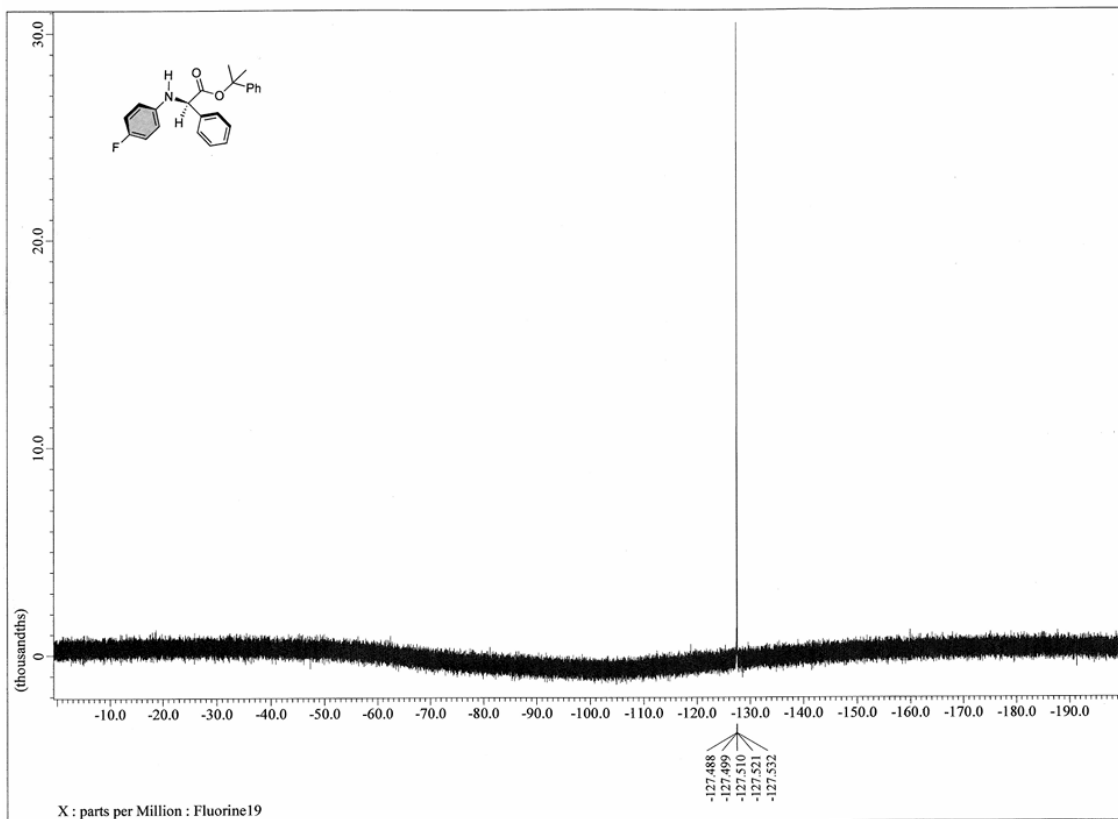

1

2

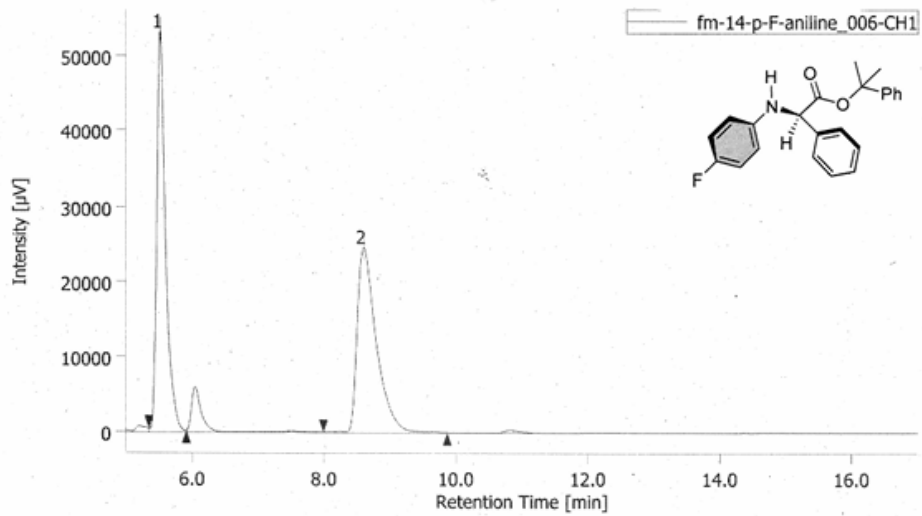

| # | tR [min] | Area [μV-sec] | Area%  | Height [μV] | Height% |
|---|----------|---------------|--------|-------------|---------|
| 1 | 5.517    | 495834        | 49.935 | 53367       | 68.397  |
| 2 | 8.600    | 497126        | 50.065 | 24658       | 31.603  |

0110 fm-15-38-p-F-chiral\_001 2025/03/13 13:03:48

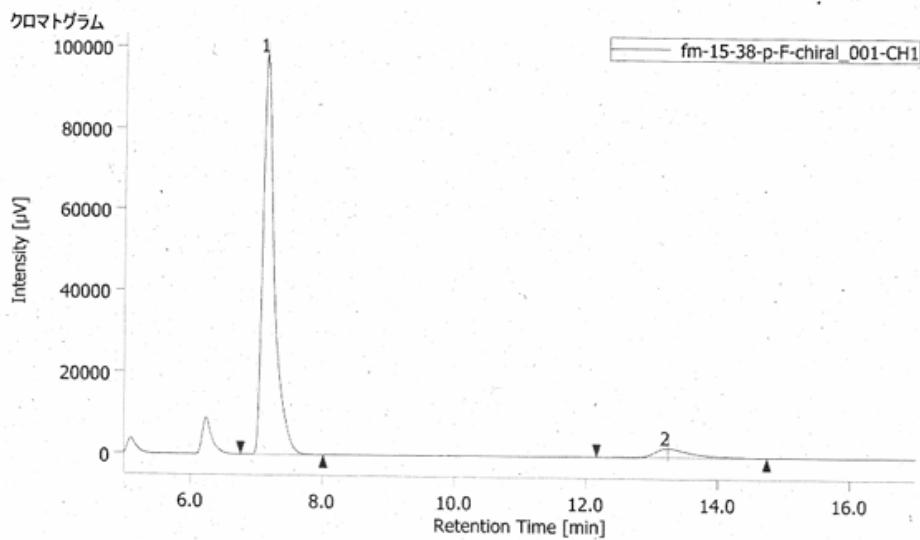

| # | tR [min] | Area [μV-sec] | Area%  | Height [μV] | Height% |
|---|----------|---------------|--------|-------------|---------|
| 1 | 7.142    | 1200720       | 93.774 | 98522       | 97.856  |
| 2 | 13.242   | 79715         | 6.226  | 2158        | 2.144   |

1  
2

1

3d

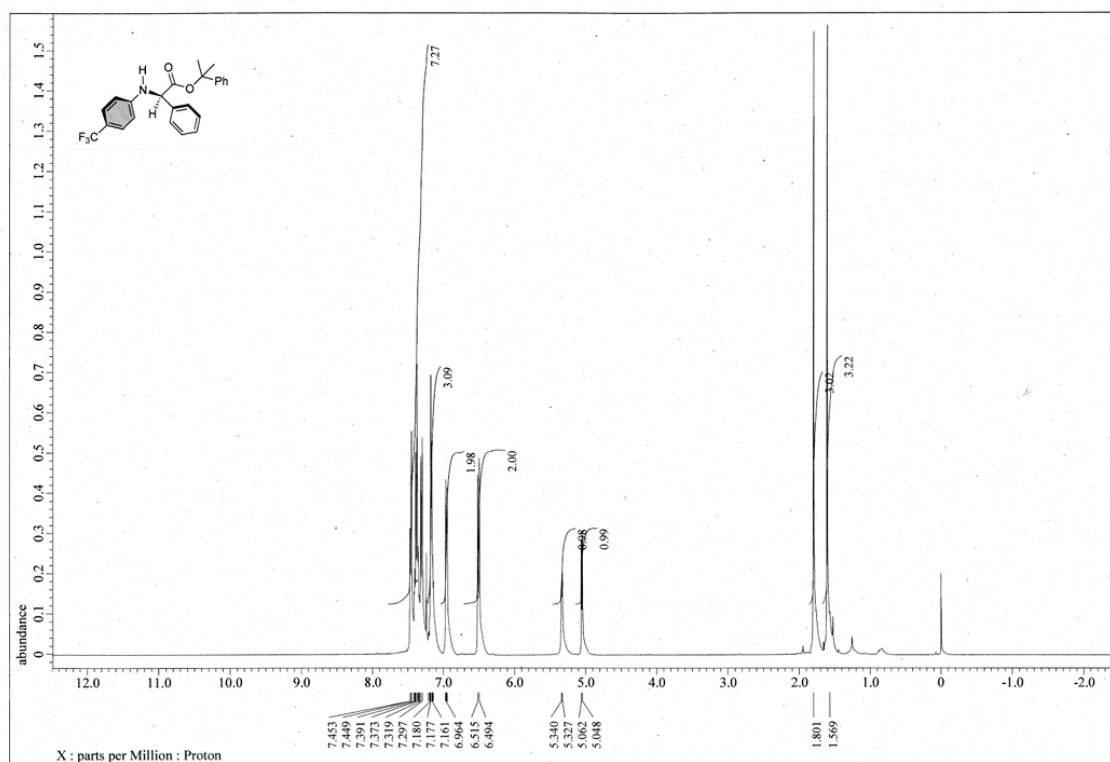

2

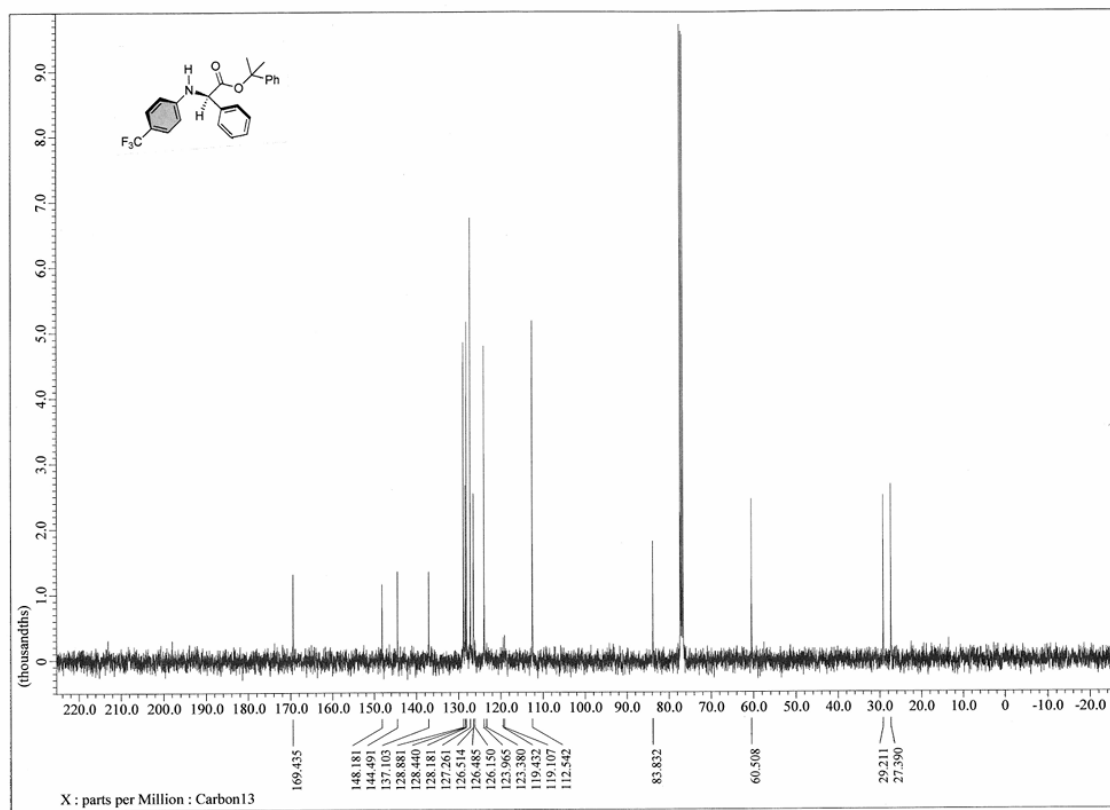

3

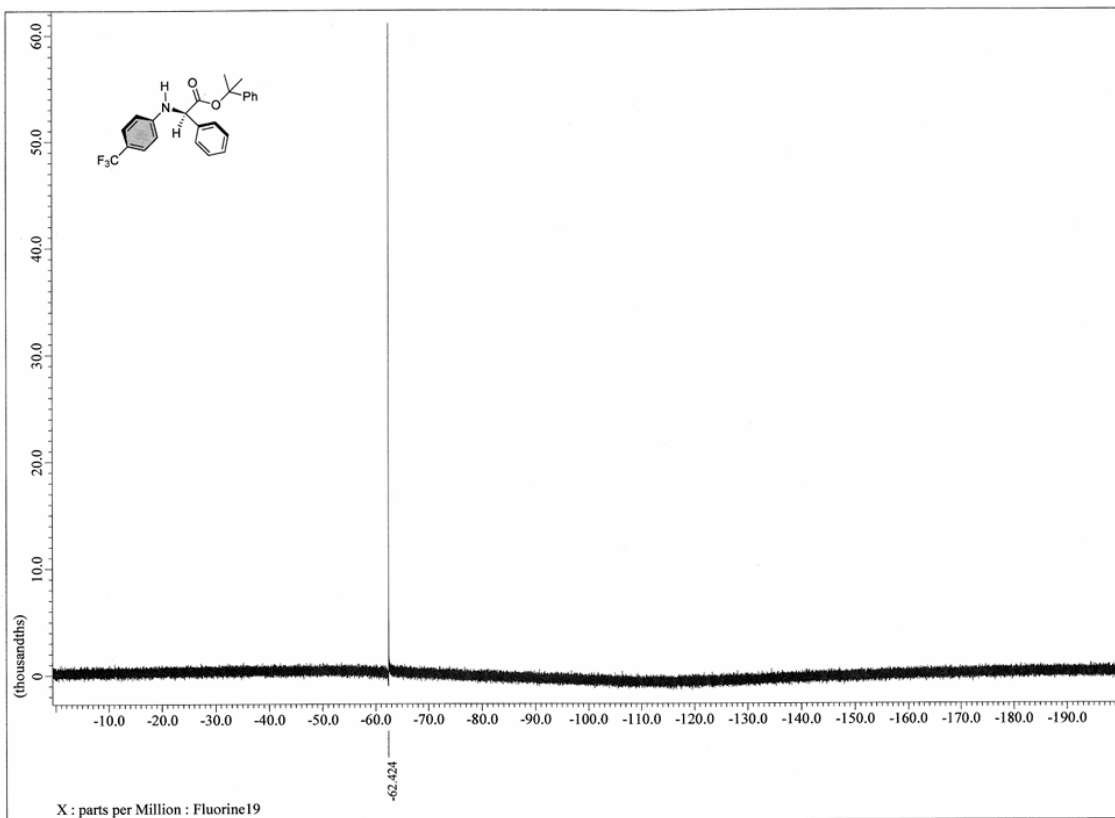

1

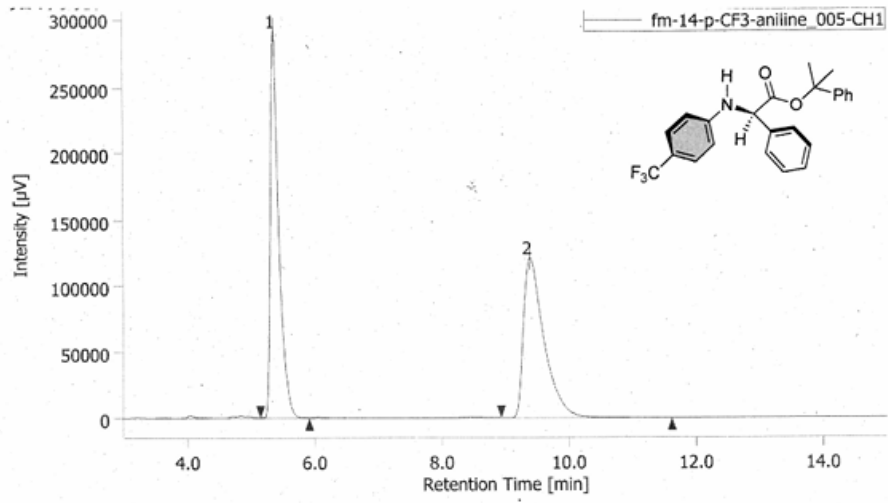

| # | tR [min] | Area [µV·sec] | Area%  | Height [µV] | Height% |
|---|----------|---------------|--------|-------------|---------|
| 1 | 5.367    | 2696655       | 50.043 | 293053      | 70.774  |
| 2 | 9.392    | 2692015       | 49.957 | 121013      | 29.226  |

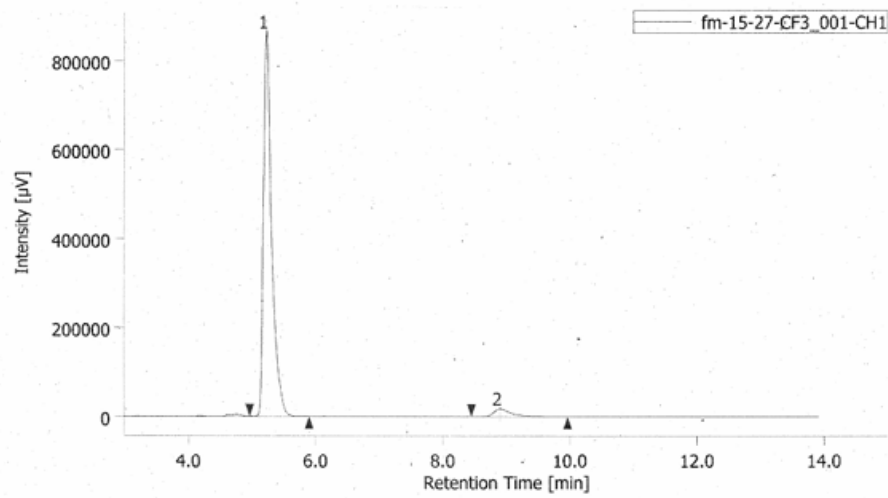

| # | tR [min] | Area [µV·sec] | Area%  | Height [µV] | Height% |
|---|----------|---------------|--------|-------------|---------|
| 1 | 5.233    | 7764055       | 96.065 | 867919      | 98.084  |
| 2 | 8.900    | 318008        | 3.935  | 16955       | 1.916   |

- 1
- 2
- 3
- 4

1

3e

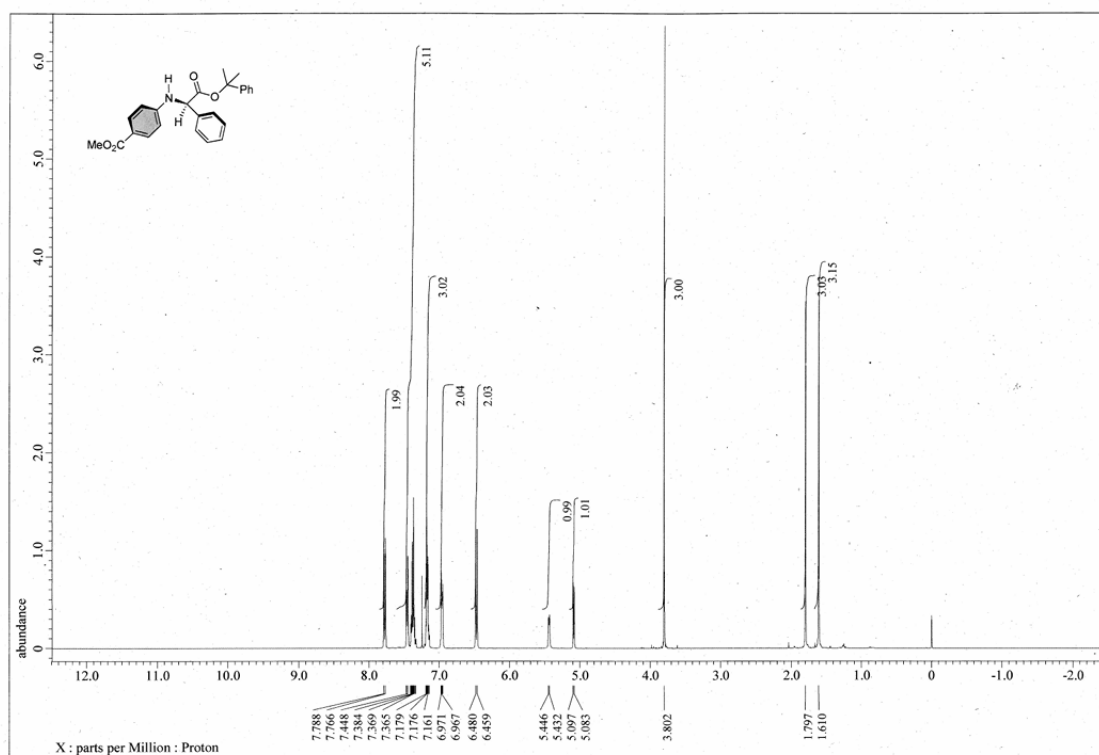

2

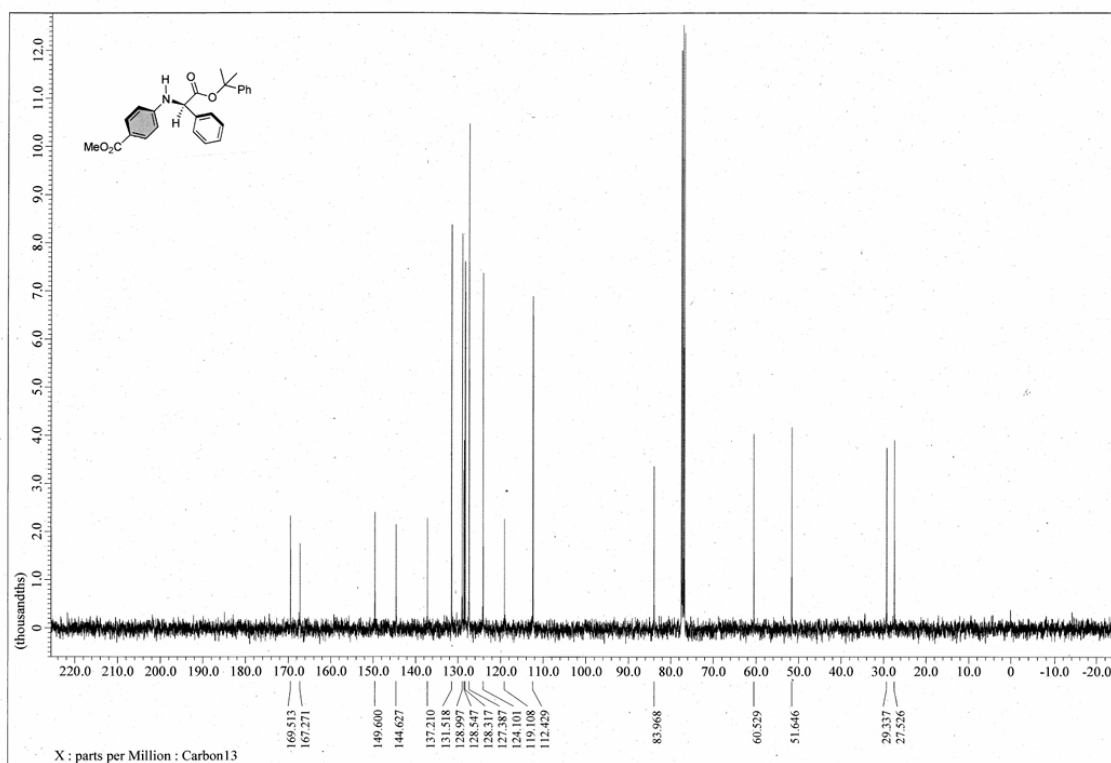

3

4

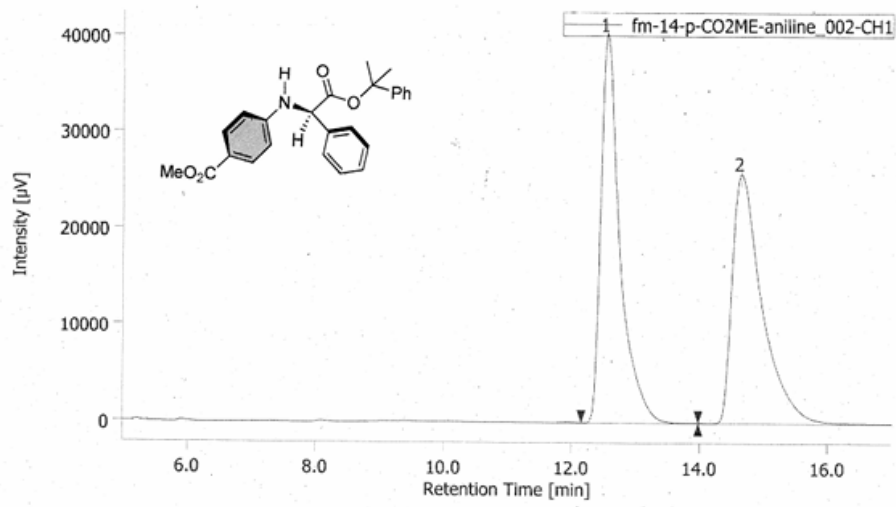

| # | tR [min] | Area [µV·sec] | Area%  | Height [µV] | Height% |
|---|----------|---------------|--------|-------------|---------|
| 1 | 12.550   | 838630        | 50.032 | 40423       | 60.915  |
| 2 | 14.650   | 837546        | 49.968 | 25937       | 39.085  |

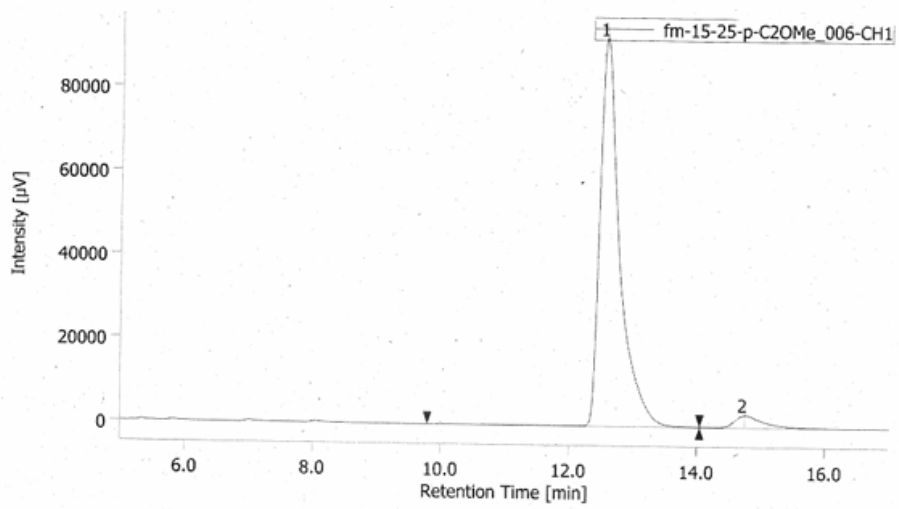

| # | tR [min] | Area [µV·sec] | Area%  | Height [µV] | Height% |
|---|----------|---------------|--------|-------------|---------|
| 1 | 12.558   | 2000823       | 95.567 | 93037       | 96.933  |
| 2 | 14.750   | 92803         | 4.433  | 2943        | 3.067   |

- 1
- 2
- 3

1

3f

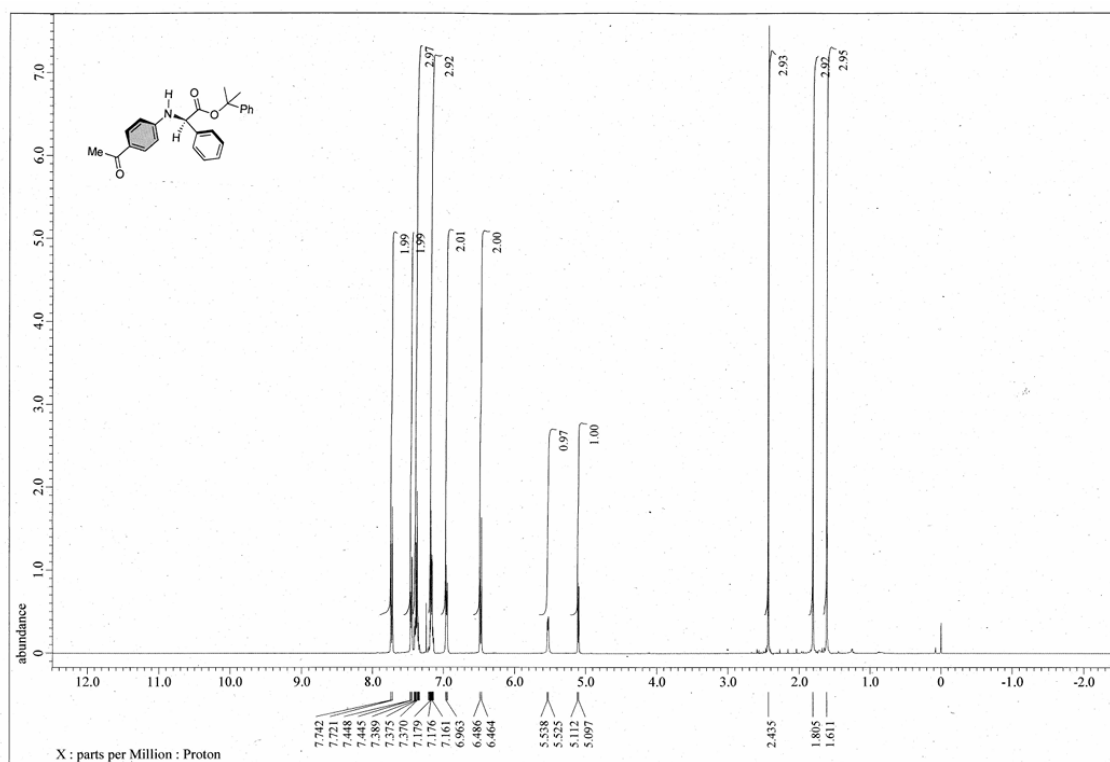

2

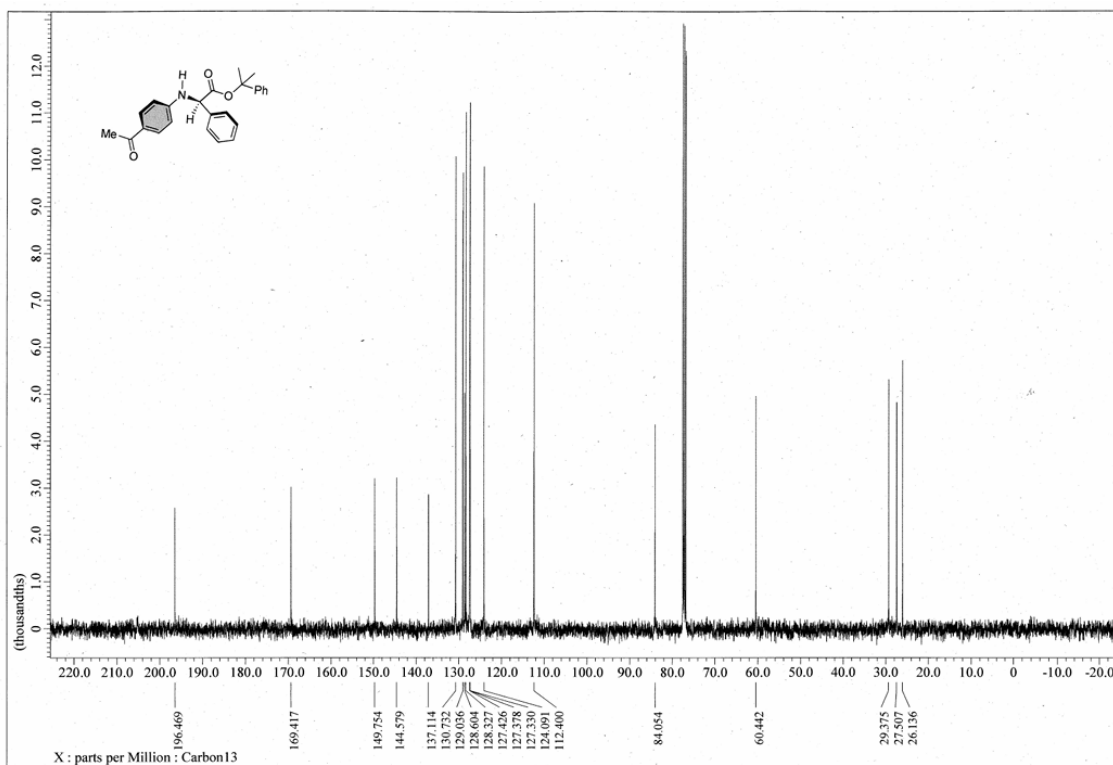

3

4

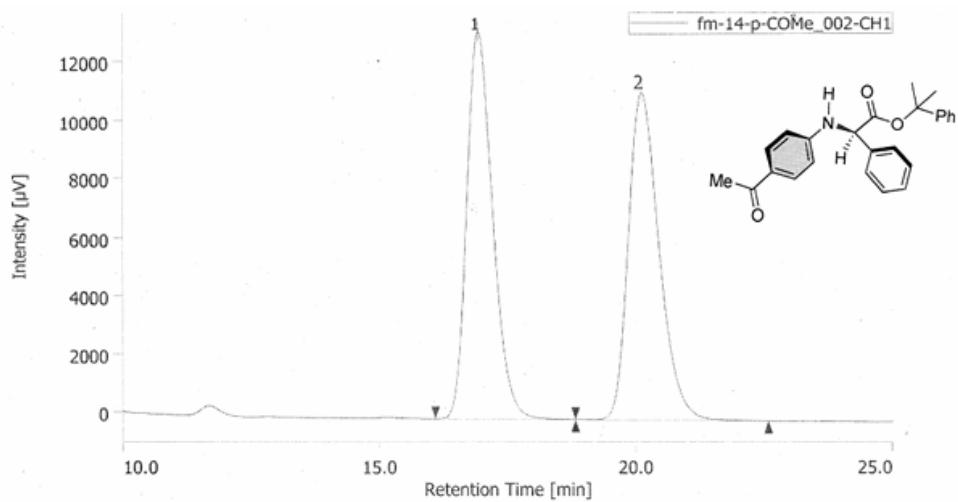

| # | tR [min] | Area [µV·sec] | Area%  | Height [µV] | Height% |
|---|----------|---------------|--------|-------------|---------|
| 1 | 16.925   | 466207        | 49.840 | 13282       | 54.159  |
| 2 | 20.108   | 469205        | 50.160 | 11242       | 45.841  |

1229 fm-15-p-COMe-chiral\_003 2025/03/13 12:18:35

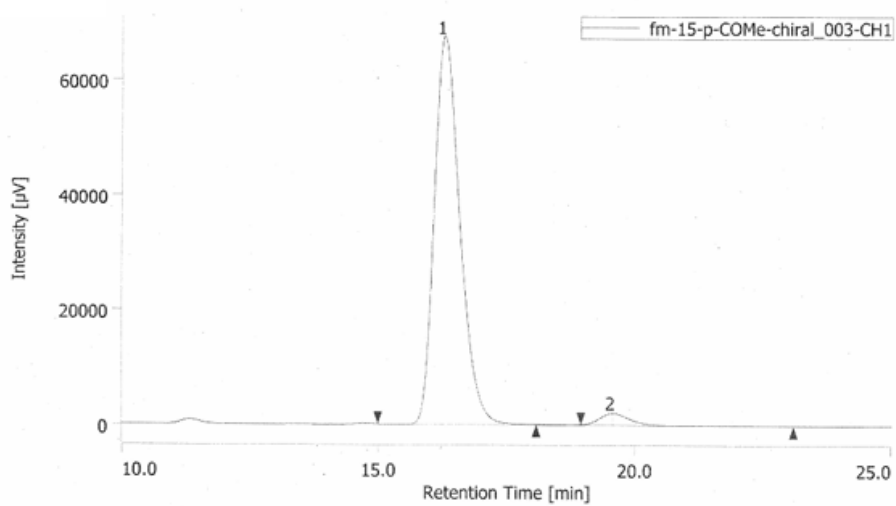

| # | tR [min] | Area [µV·sec] | Area%  | Height [µV] | Height% |
|---|----------|---------------|--------|-------------|---------|
| 1 | 16.283   | 2342353       | 96.589 | 67536       | 97.068  |
| 2 | 19.567   | 82716         | 3.411  | 2040        | 2.932   |

- 1
- 2
- 3

1

3g

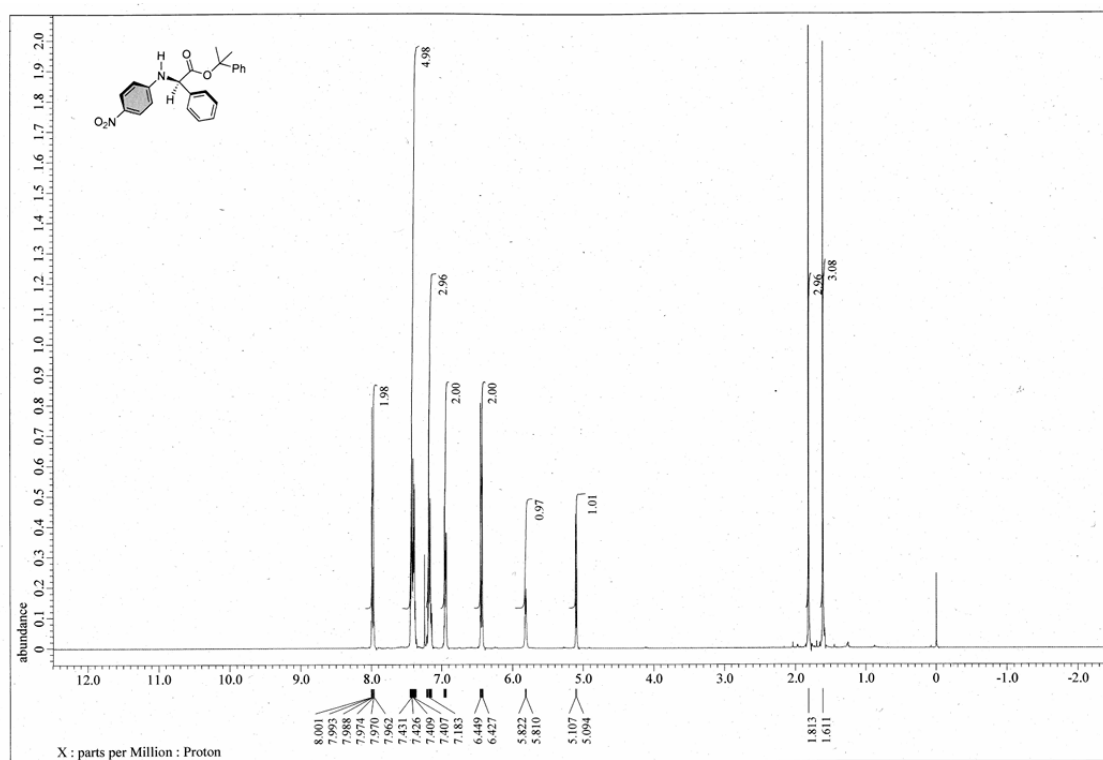

2

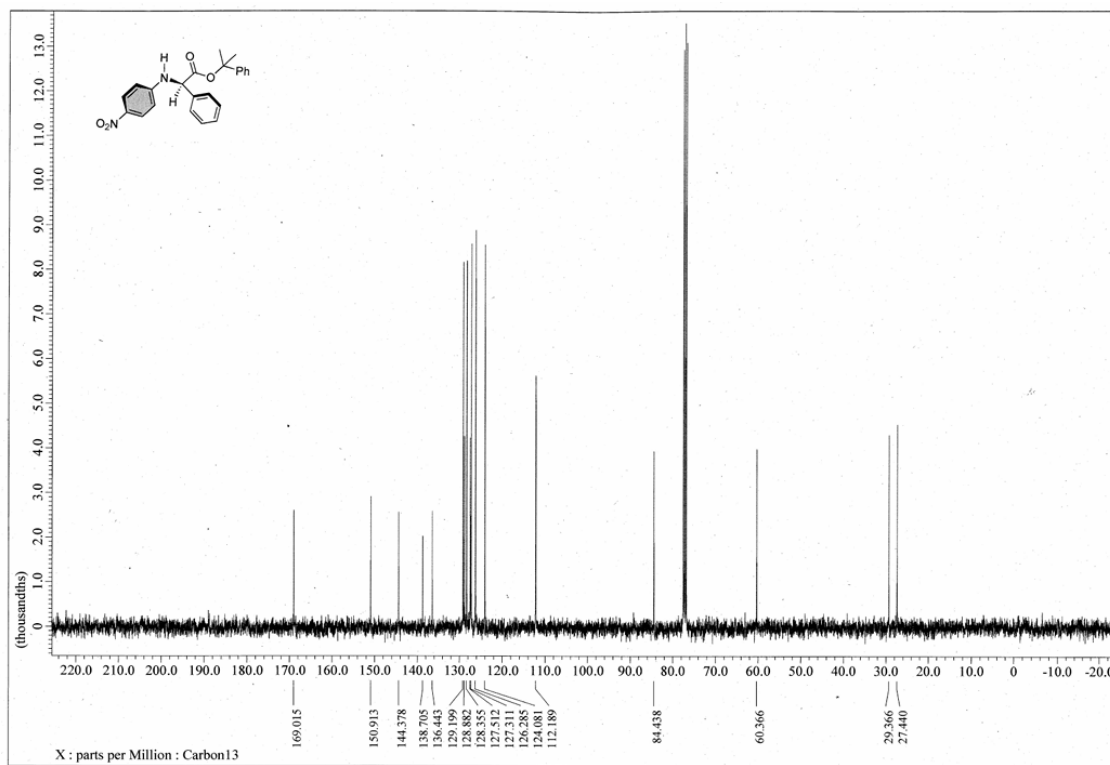

3

4

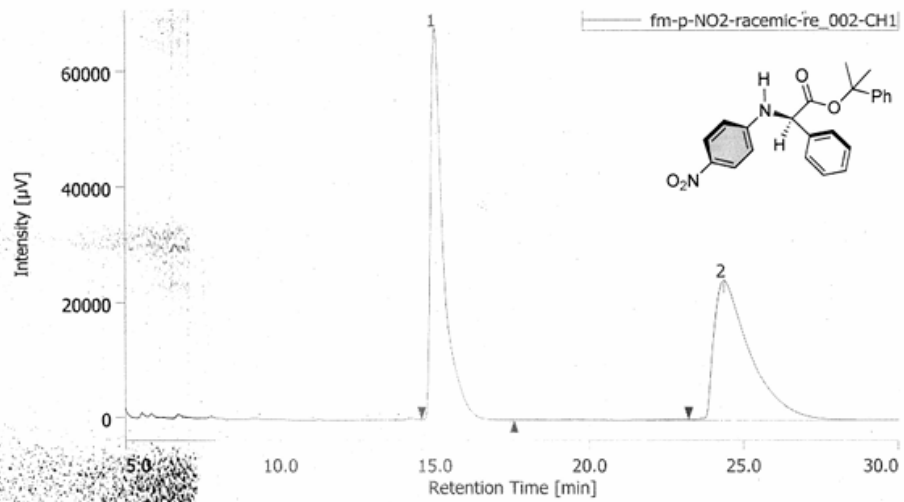

| # | tR [min] | Area [ $\mu\text{V}\cdot\text{sec}$ ] | Area%  | Height [ $\mu\text{V}$ ] | Height% |
|---|----------|---------------------------------------|--------|--------------------------|---------|
| 1 | 14.992   | 1961513                               | 49.921 | 67884                    | 73.730  |
| 2 | 24.350   | 1967713                               | 50.079 | 24188                    | 26.270  |

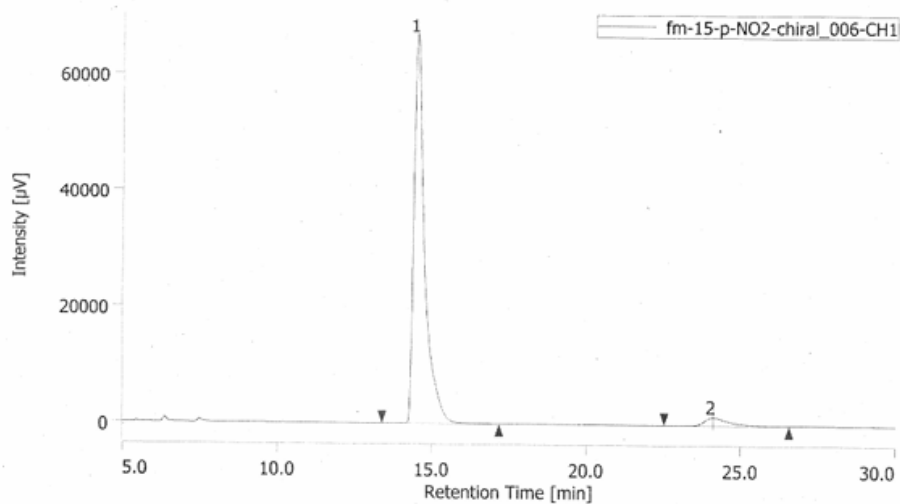

| # | tR [min] | Area [ $\mu\text{V}\cdot\text{sec}$ ] | Area%  | Height [ $\mu\text{V}$ ] | Height% |
|---|----------|---------------------------------------|--------|--------------------------|---------|
| 1 | 14.500   | 1616330                               | 95.665 | 67072                    | 97.968  |
| 2 | 24.108   | 73241                                 | 4.335  | 1391                     | 2.032   |

- 1
- 2
- 3
- 4

1

3h

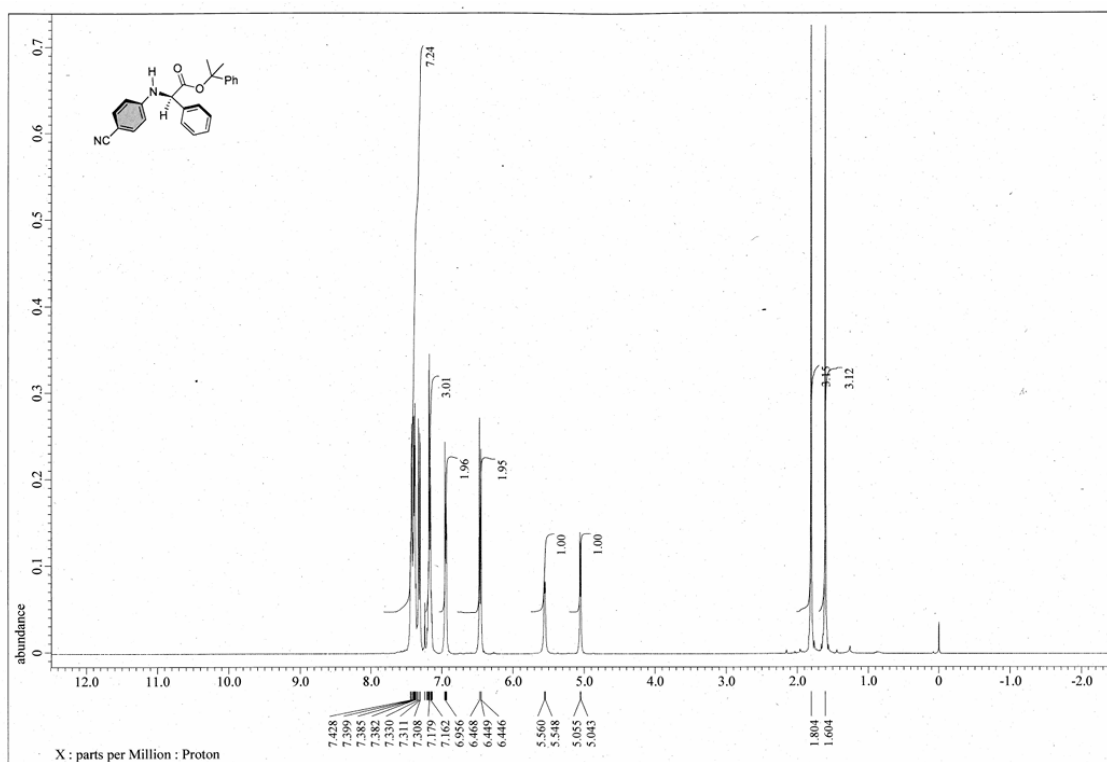

2

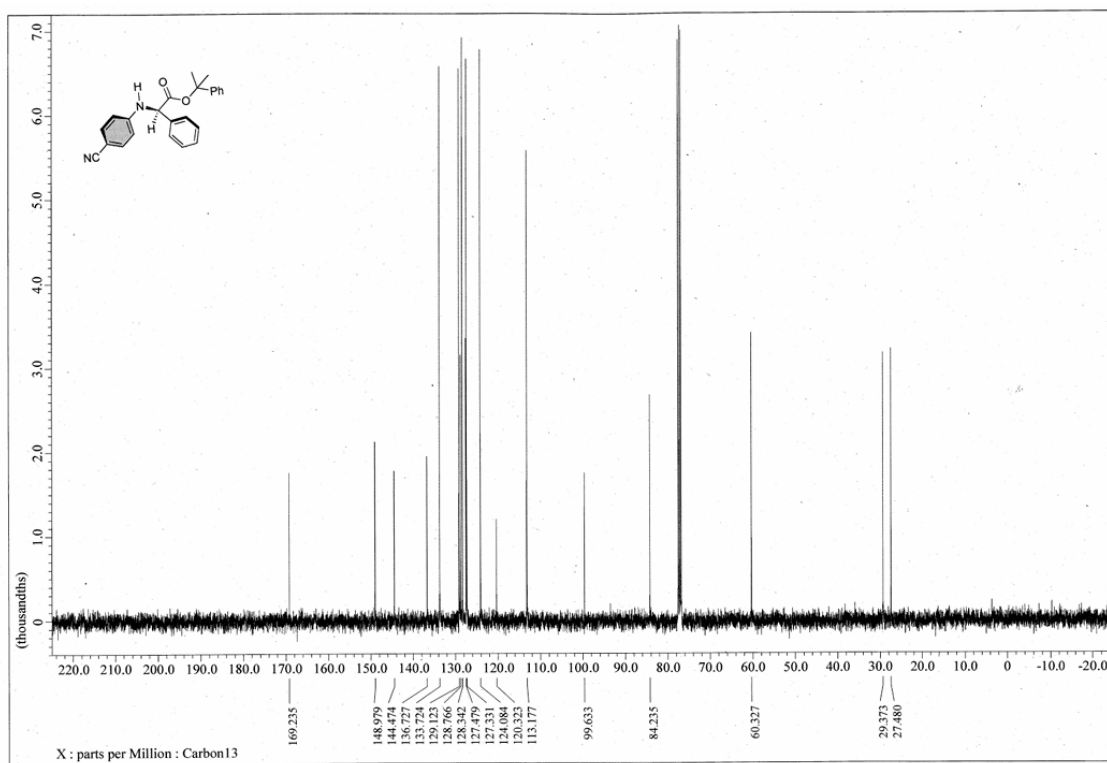

3

4

0614 08-578\_001 2026/06/15 15:18:56

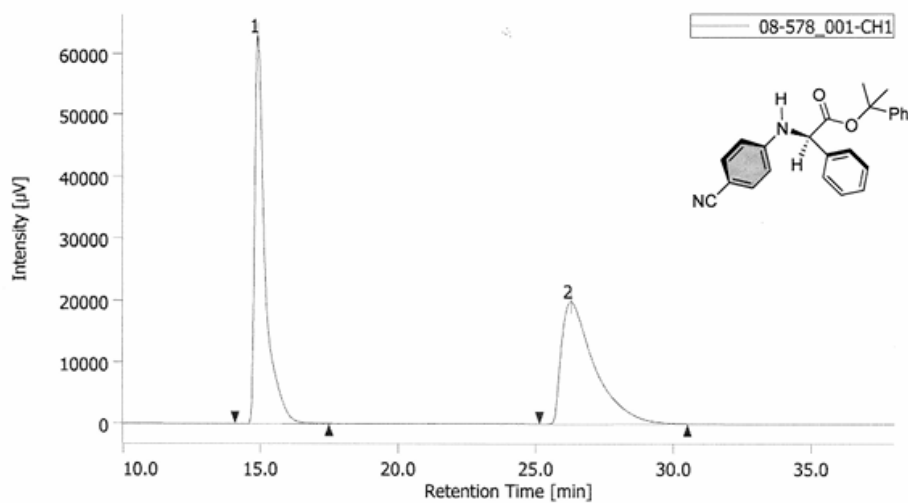

| # | tR [min] | Area [ $\mu\text{V}\cdot\text{sec}$ ] | Area%  | Height [ $\mu\text{V}$ ] [ $\mu\text{V}$ ] | Height% |
|---|----------|---------------------------------------|--------|--------------------------------------------|---------|
| 1 | 14.925   | 1658442                               | 50.087 | 63145                                      | 76.007  |
| 2 | 26.275   | 1652661                               | 49.913 | 19932                                      | 23.993  |

0416 yk-ts-07-509re\_001 2026/06/14 2:26:56

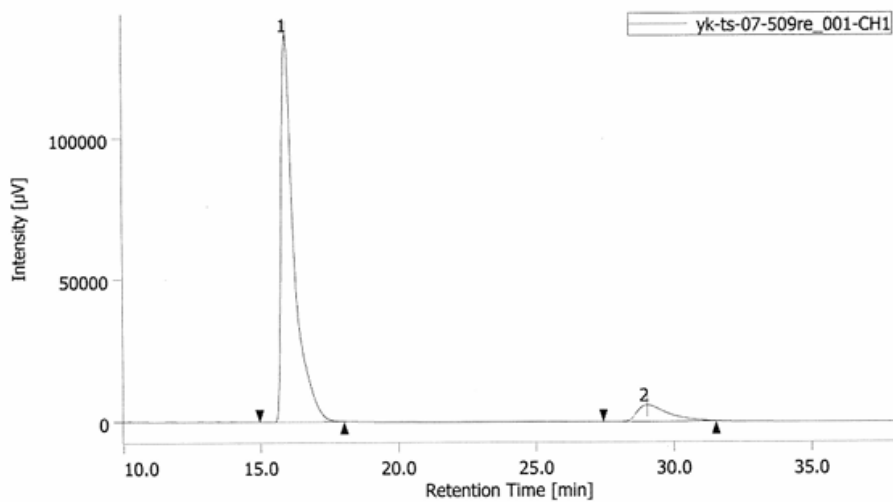

| # | tR [min] | Area [ $\mu\text{V}\cdot\text{sec}$ ] | Area%  | Height [ $\mu\text{V}$ ] [ $\mu\text{V}$ ] | Height% |
|---|----------|---------------------------------------|--------|--------------------------------------------|---------|
| 1 | 15.933   | 4409963                               | 90.810 | 137137                                     | 95.966  |
| 2 | 29.017   | 446312                                | 9.190  | 5764                                       | 4.034   |

1

3i

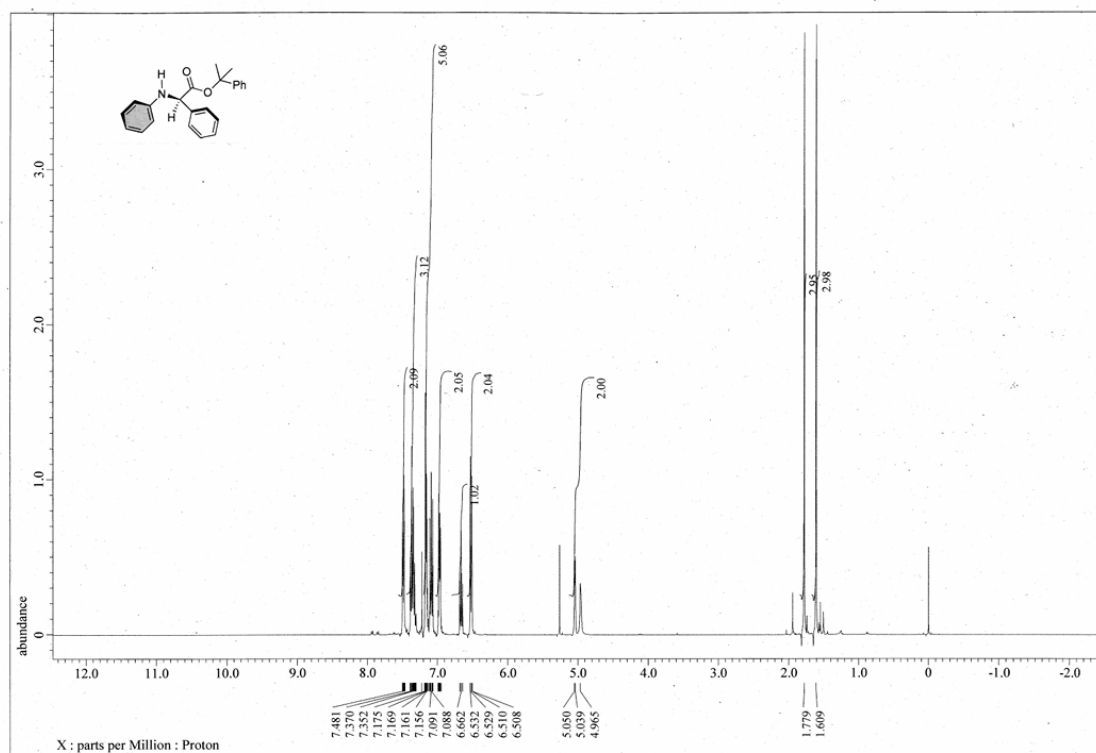

2

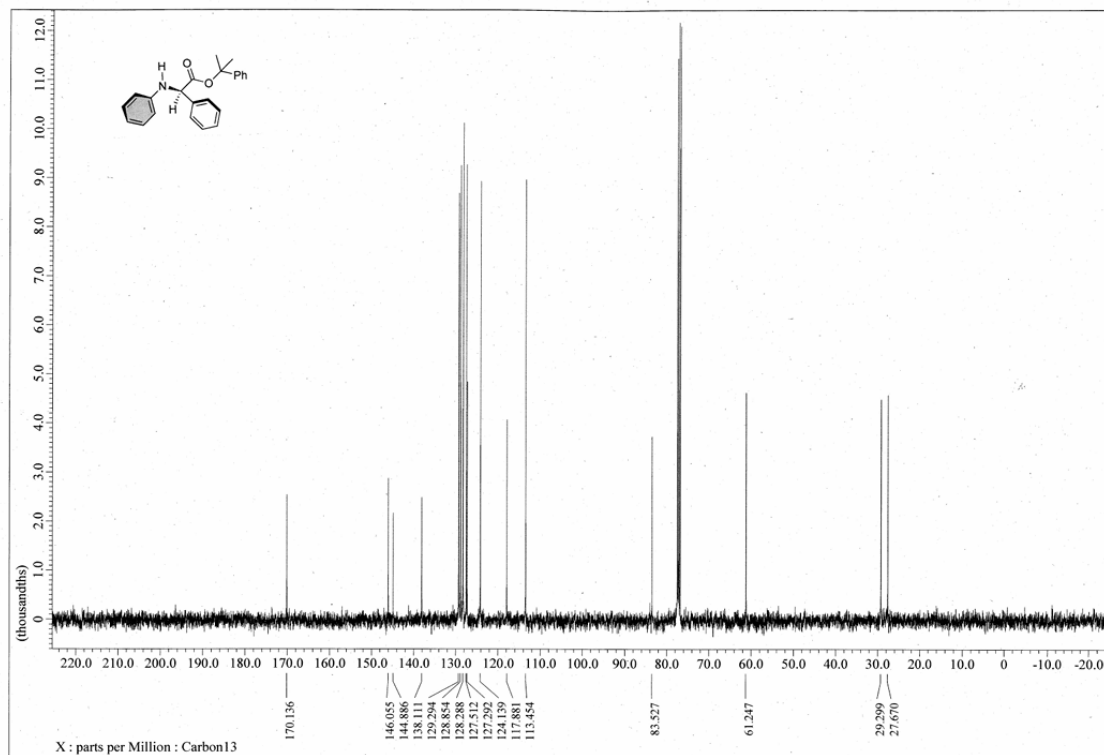

3

4

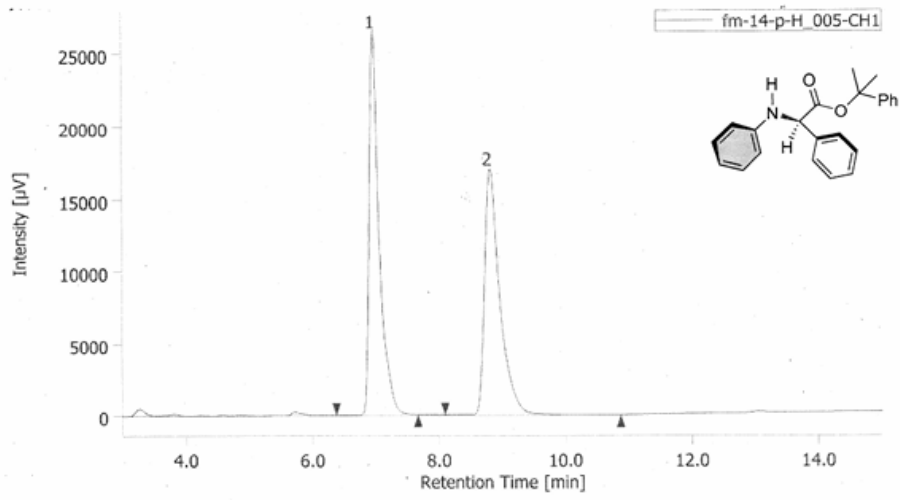

| # | tR [min] | Area [µV.sec] | Area%  | Height [µV] | Height% |
|---|----------|---------------|--------|-------------|---------|
| 1 | 6.967    | 295666        | 50.895 | 26660       | 61.091  |
| 2 | 8.808    | 285272        | 49.105 | 16980       | 38.909  |

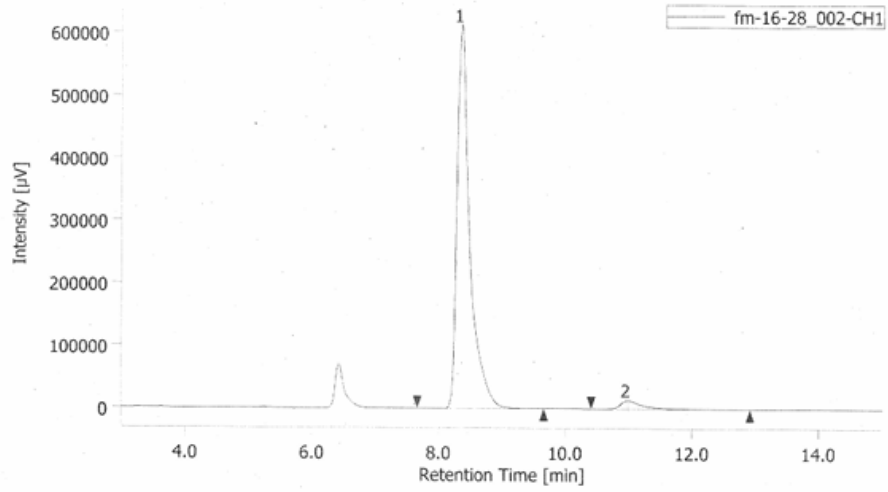

| # | tR [min] | Area [µV.sec] | Area%  | Height [µV] | Height% |
|---|----------|---------------|--------|-------------|---------|
| 1 | 8.350    | 8578580       | 96.564 | 614210      | 97.907  |
| 2 | 10.992   | 305278        | 3.436  | 13128       | 2.093   |

- 1
- 2
- 3
- 4

1

3j

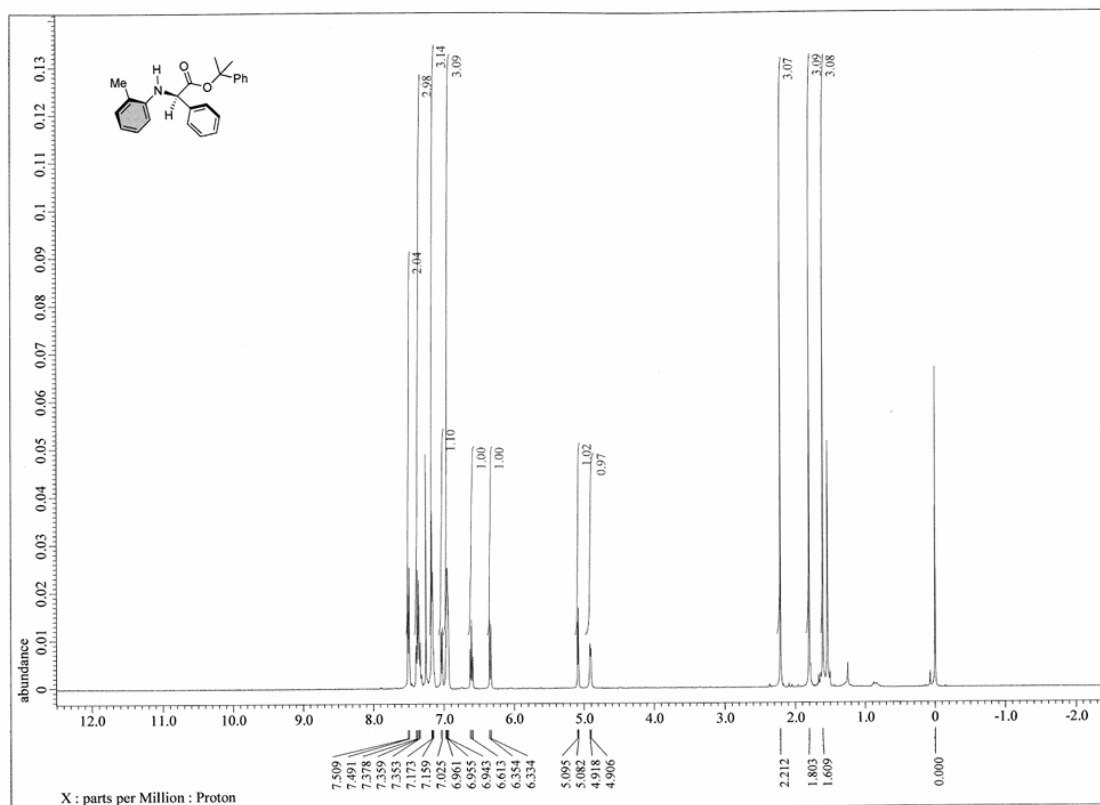

2

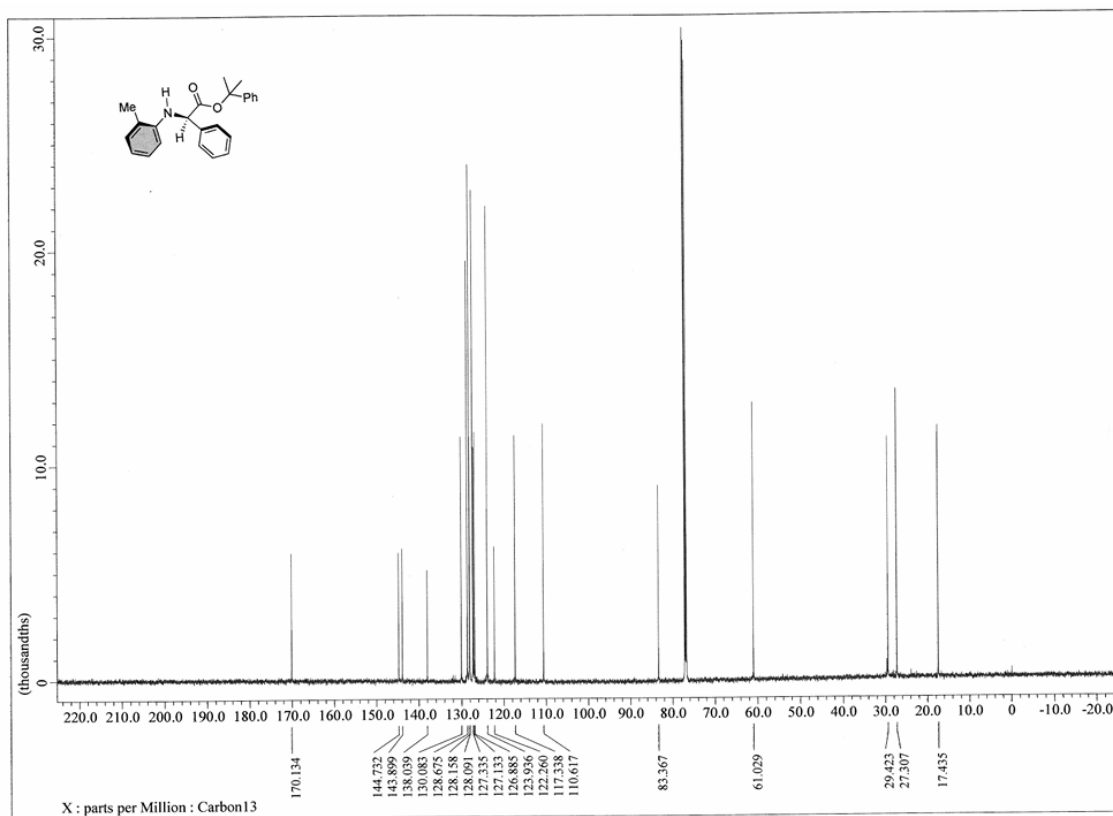

3

0508 yk-ts-7-533\_004 2026/05/08 13:32:36

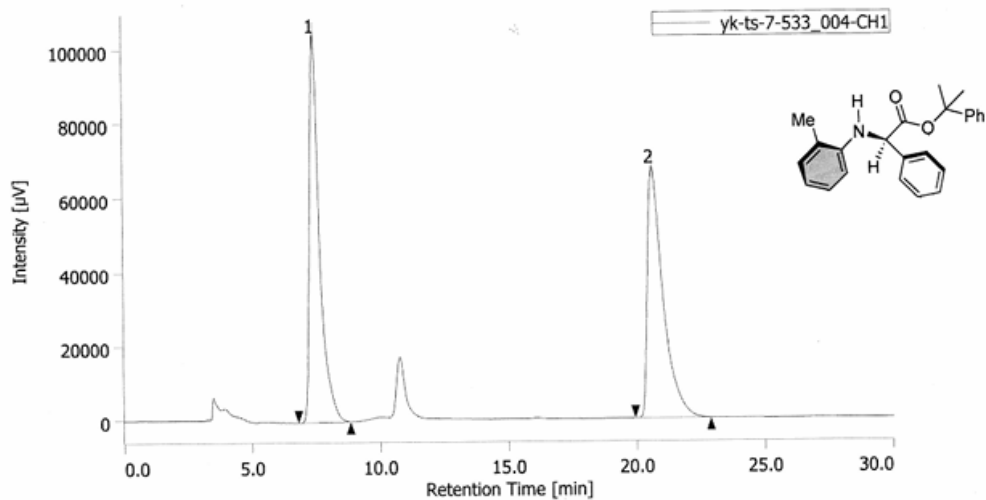

| # | tR [min] | Area [µV·sec] | Area%  | Height [µV] | Height% |
|---|----------|---------------|--------|-------------|---------|
| 1 | 7.450    | 2843651       | 49.785 | 104655      | 60.608  |
| 2 | 20.633   | 2868223       | 50.215 | 68020       | 39.392  |

0614 yk-ts-08-574\_001 2026/06/14 19:32:19

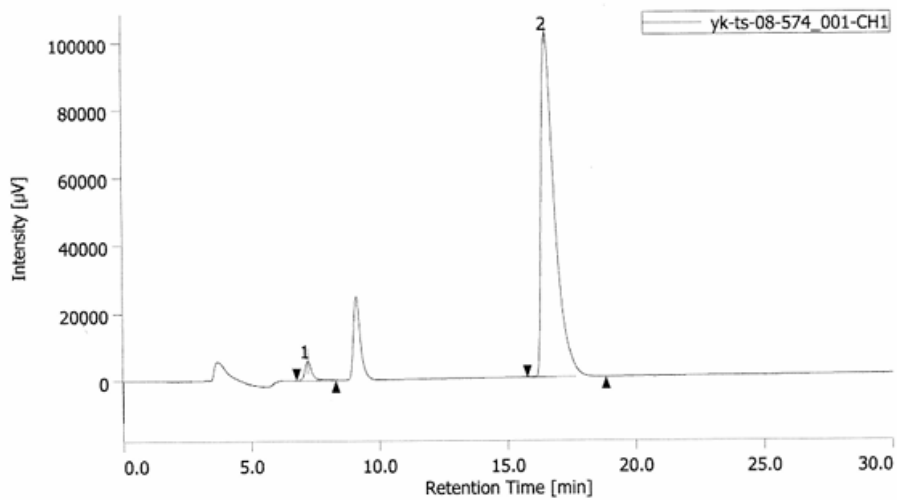

| # | tR [min] | Area [µV·sec] | Area%  | Height [µV] | Height% |
|---|----------|---------------|--------|-------------|---------|
| 1 | 7.208    | 110868        | 2.930  | 5748        | 5.323   |
| 2 | 16.517   | 3673204       | 97.070 | 102248      | 94.677  |

- 1
- 2
- 3

1

3k

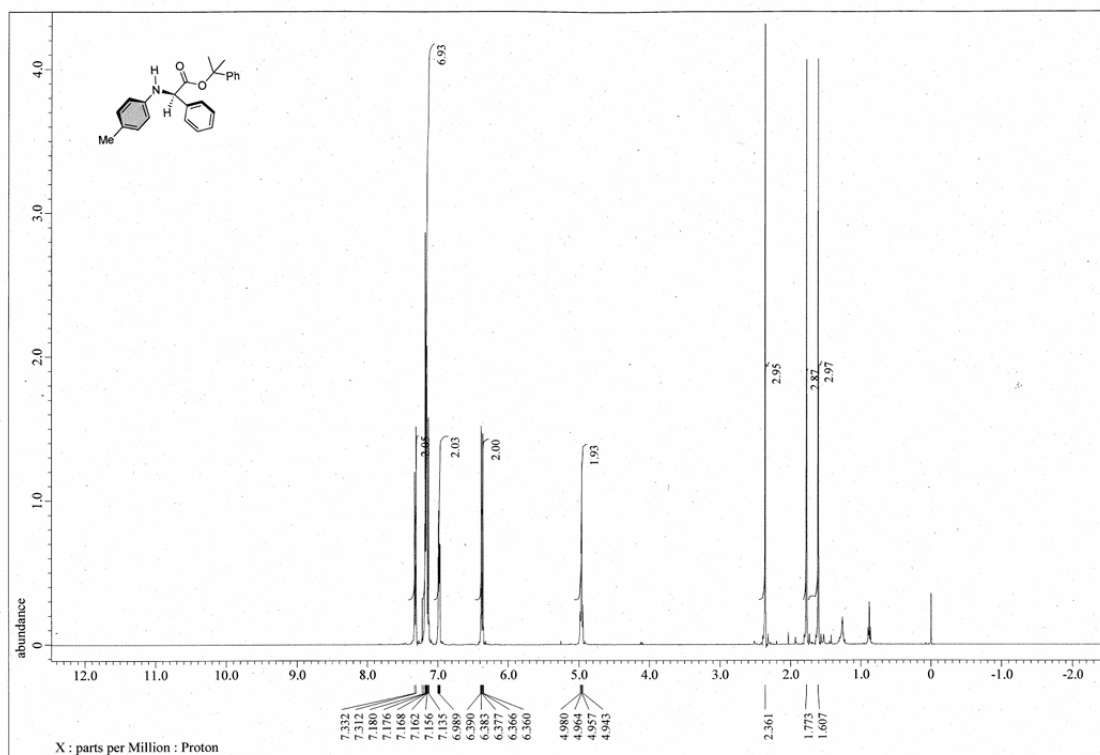

2

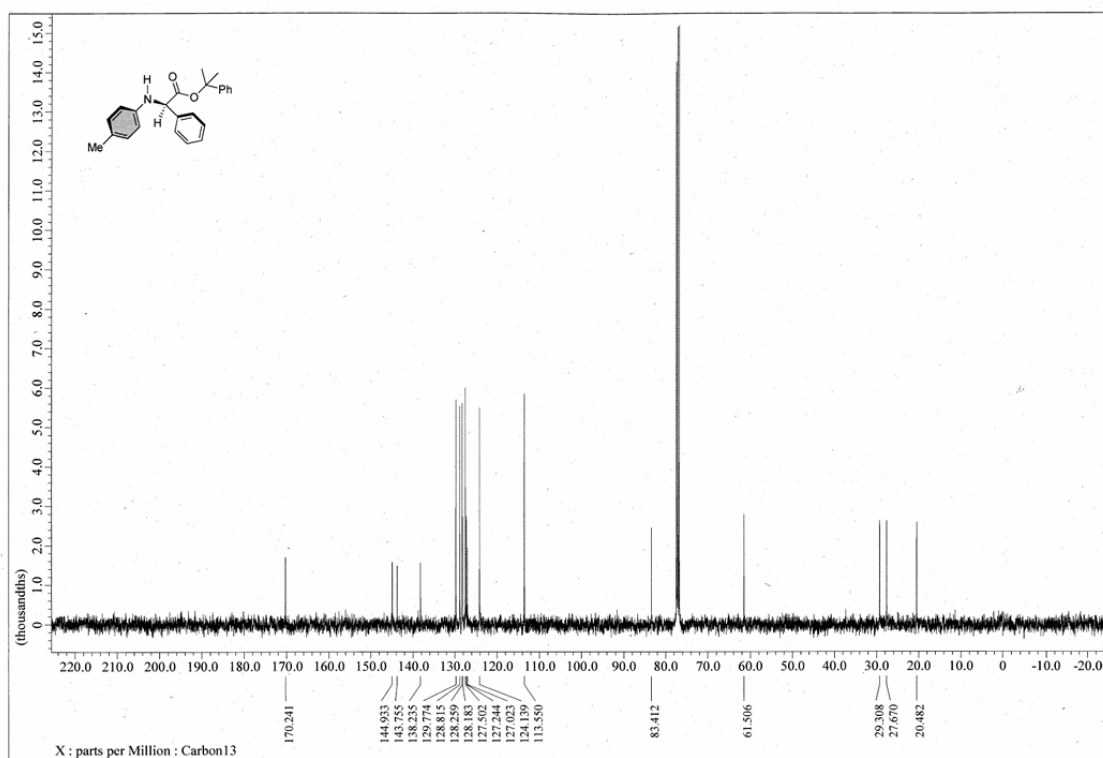

3

4

1

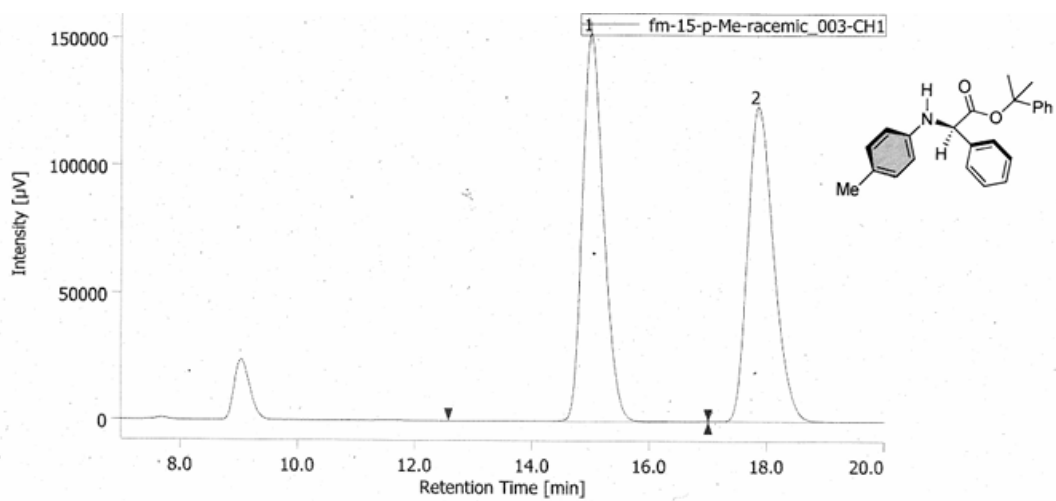

| # | tR [min] | Area [µV·sec] | Area%  | Height [µV] | Height% |
|---|----------|---------------|--------|-------------|---------|
| 1 | 14.992   | 3834097       | 49.958 | 152988      | 55.145  |
| 2 | 17.842   | 3840523       | 50.042 | 124441      | 44.855  |

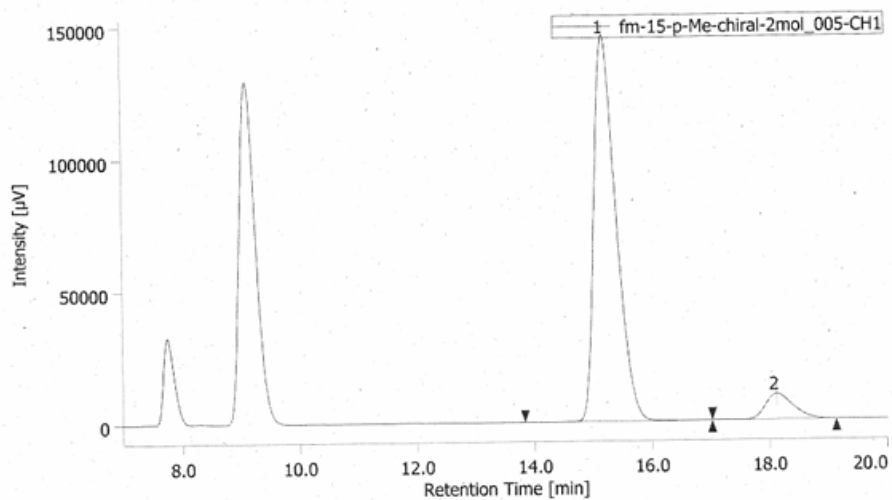

| # | tR [min] | Area [µV·sec] | Area%  | Height [µV] | Height% |
|---|----------|---------------|--------|-------------|---------|
| 1 | 15.192   | 3779079       | 92.257 | 145770      | 93.796  |
| 2 | 18.117   | 317183        | 7.743  | 9642        | 6.204   |

2

3

4

5

1  
2

31

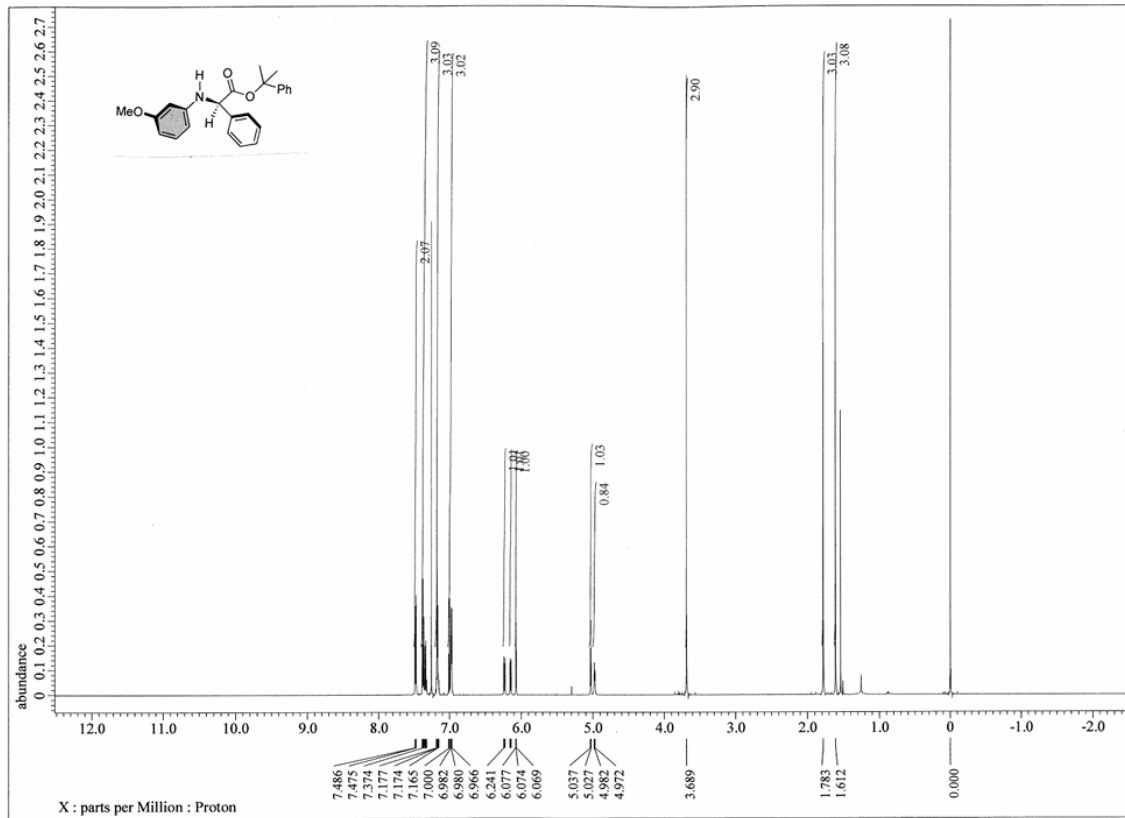

3

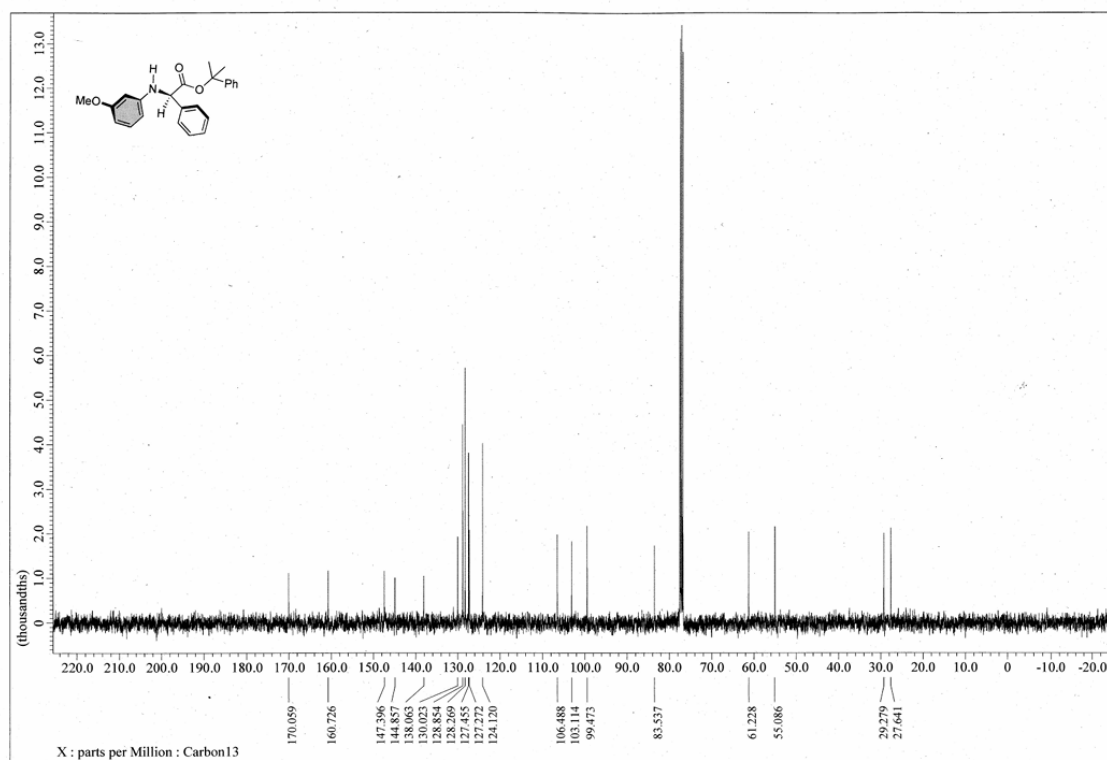

1

2

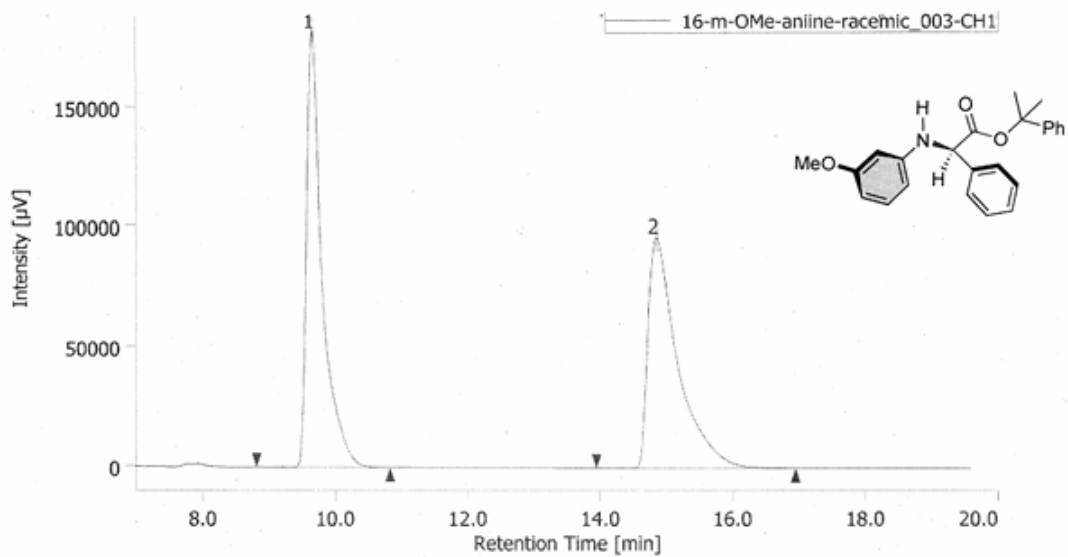

| # | tR [min] | Area [µV·sec] | Area%  | Height [µV] | Height% |
|---|----------|---------------|--------|-------------|---------|
| 1 | 9.650    | 2968762       | 49.877 | 181665      | 65.504  |
| 2 | 14.850   | 2983421       | 50.123 | 95668       | 34.496  |

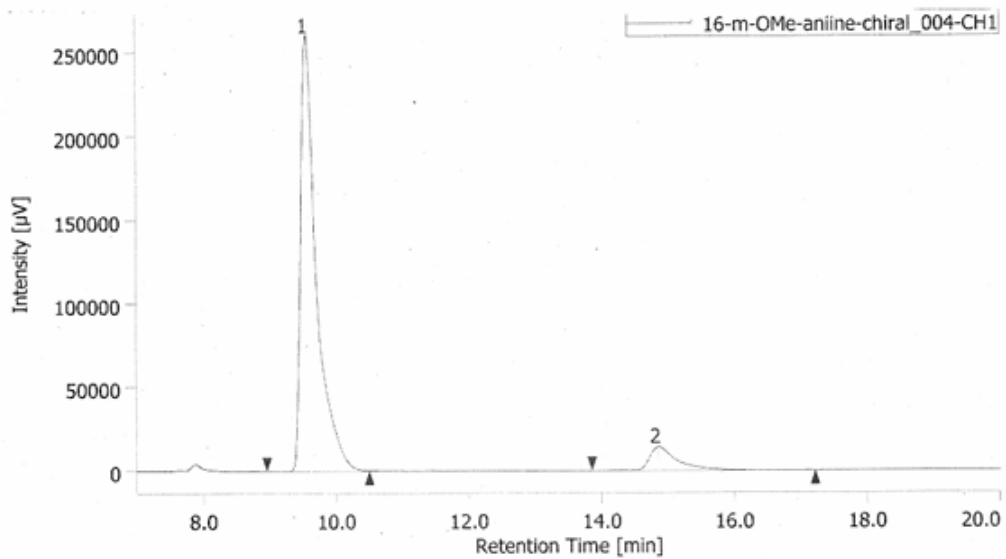

| # | tR [min] | Area [µV·sec] | Area%  | Height [µV] | Height% |
|---|----------|---------------|--------|-------------|---------|
| 1 | 9.558    | 4279117       | 91.676 | 261180      | 94.941  |
| 2 | 14.850   | 388538        | 8.324  | 13916       | 5.059   |

1  
2  
3

3m

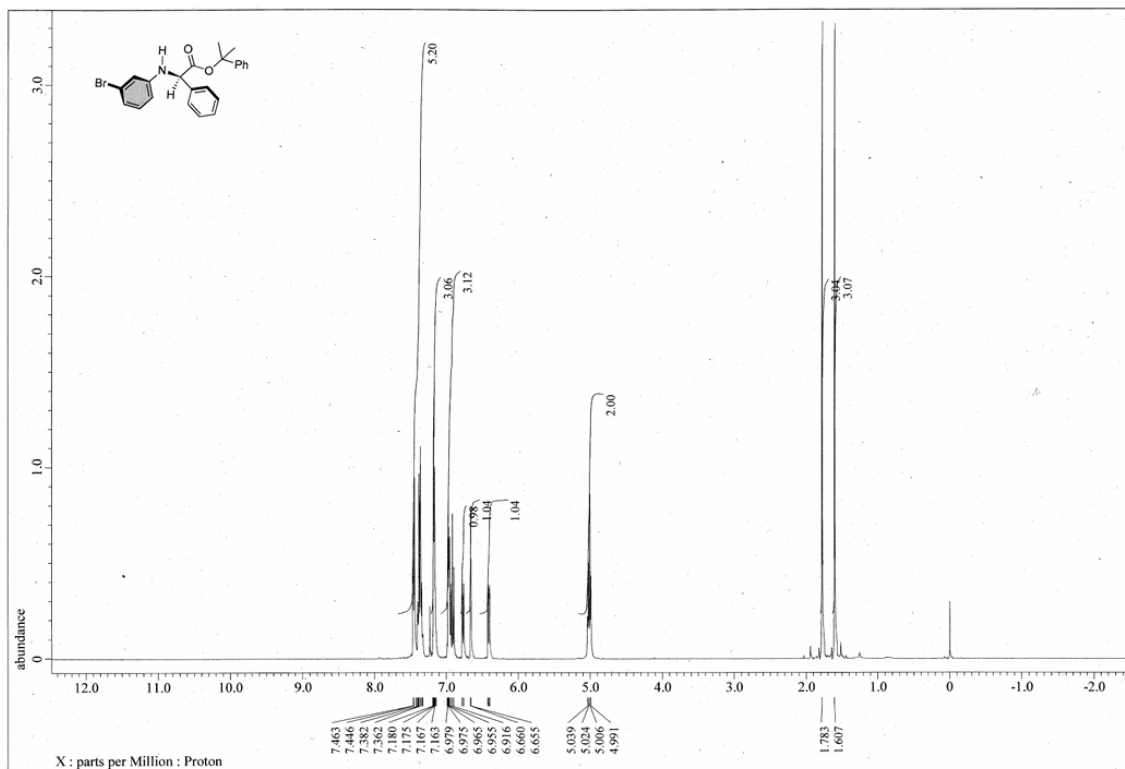

1

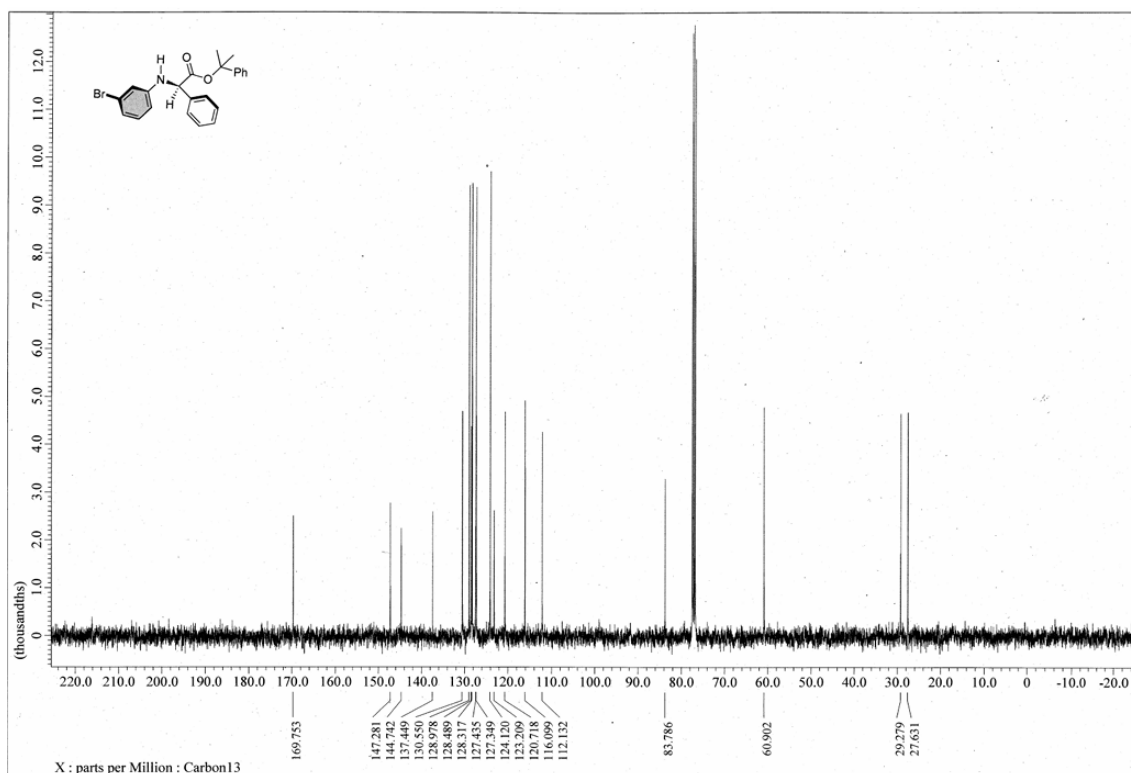

2

3

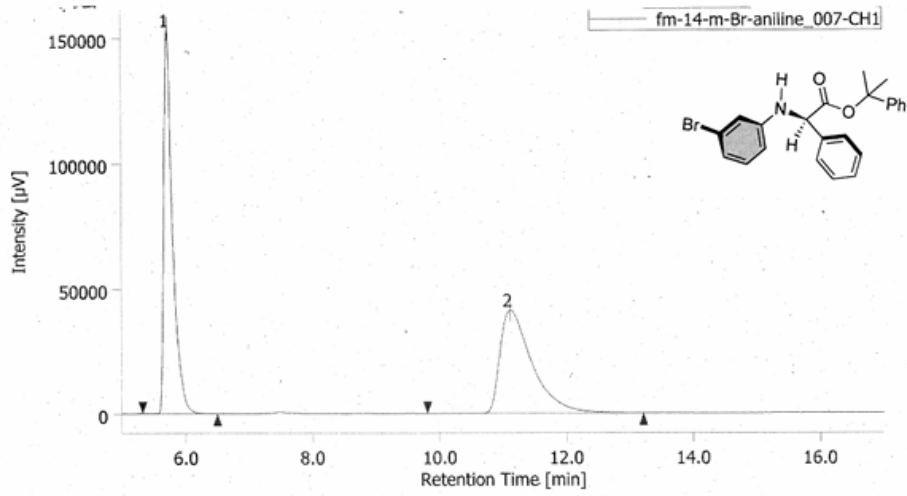

| # | tR [min] | Area [µV·sec] | Area%  | Height [µV] | Height% |
|---|----------|---------------|--------|-------------|---------|
| 1 | 5.725    | 1463262       | 50.242 | 153780      | 78.857  |
| 2 | 11.117   | 1449182       | 49.758 | 41231       | 21.143  |

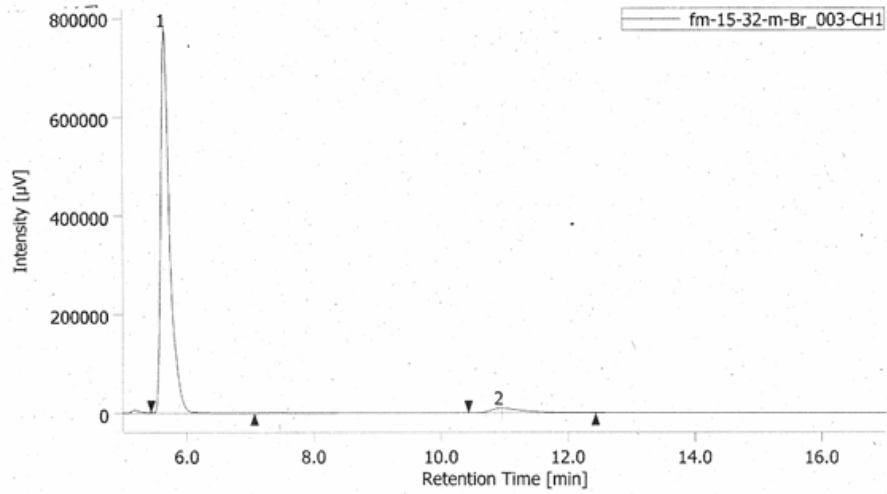

| # | tR [min] | Area [µV·sec] | Area%  | Height [µV] | Height% |
|---|----------|---------------|--------|-------------|---------|
| 1 | 5.650    | 7525734       | 95.716 | 780083      | 98.745  |
| 2 | 10.950   | 336842        | 4.284  | 9911        | 1.255   |

- 1
- 2
- 3
- 4
- 5

1

3n

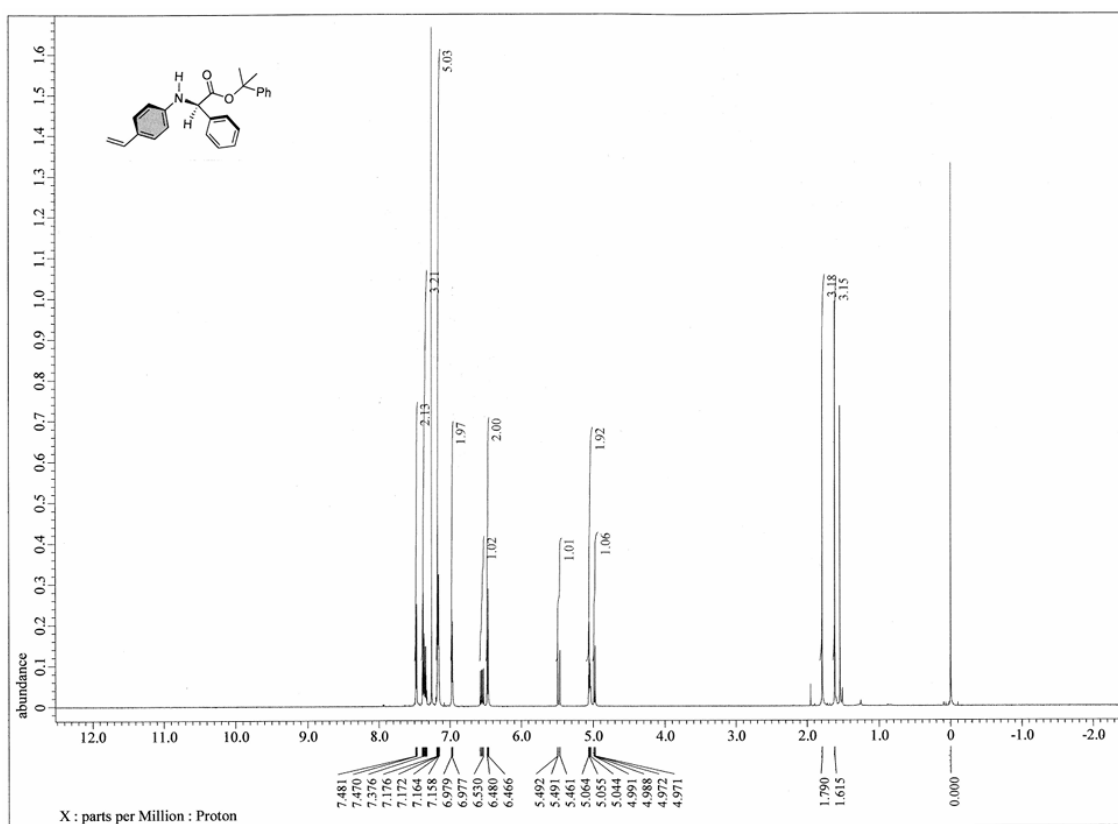

2

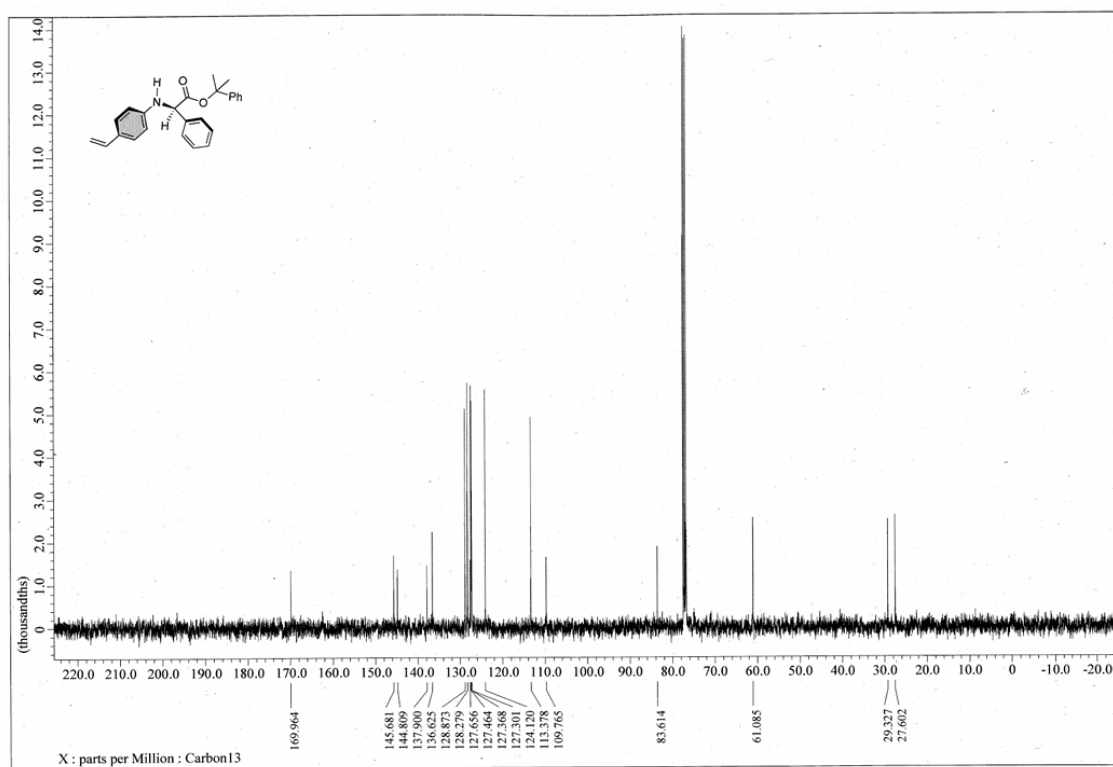

3

1

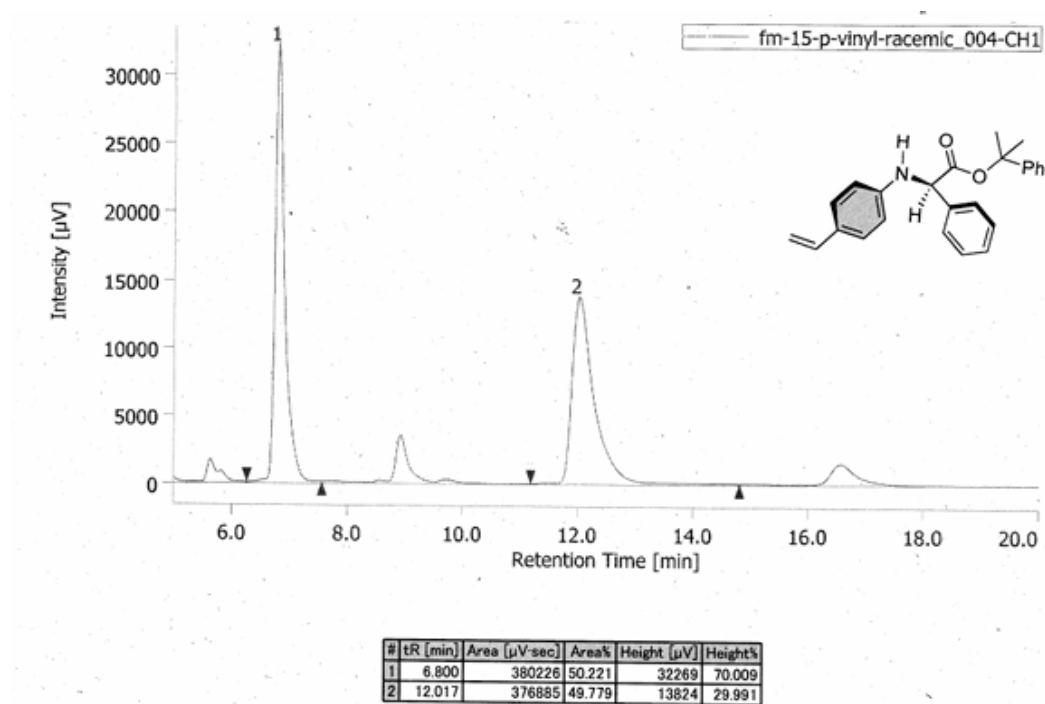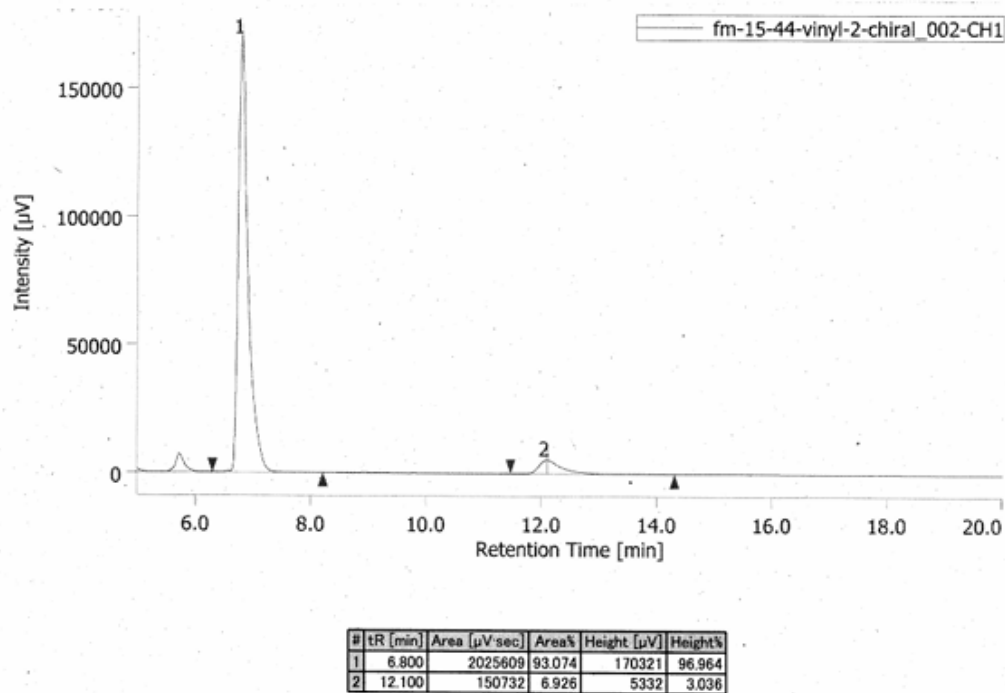

2

1  
2

3o

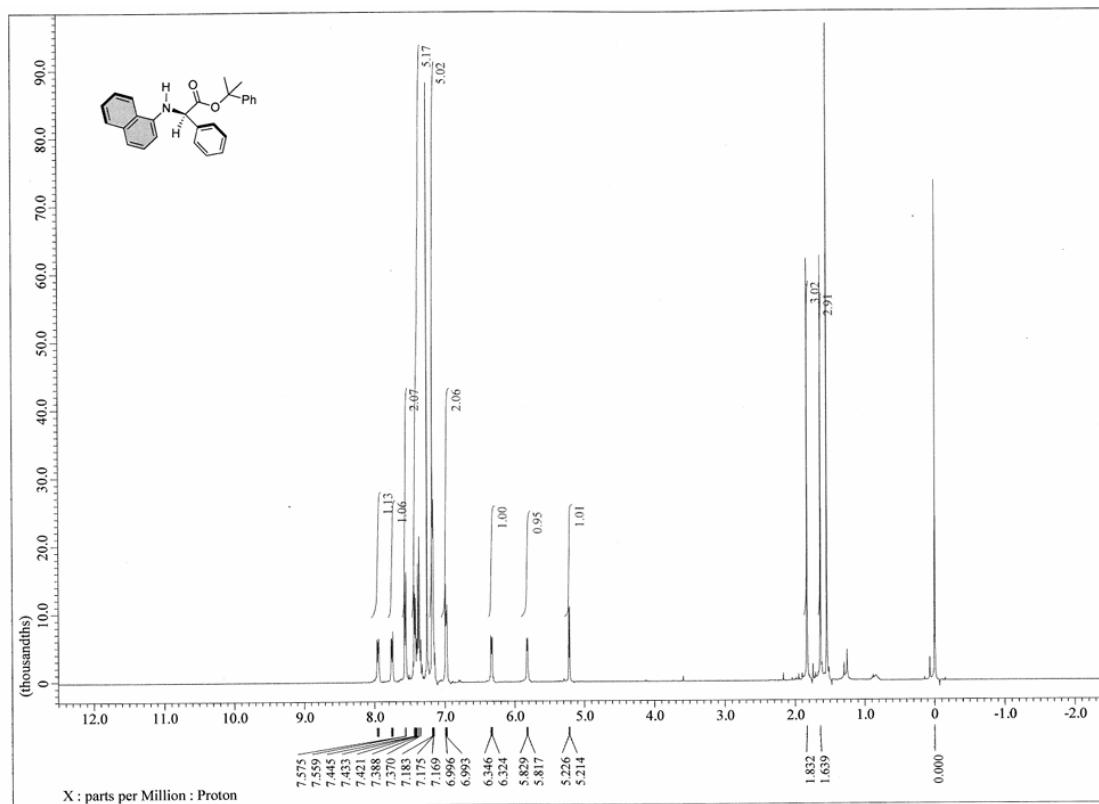

3

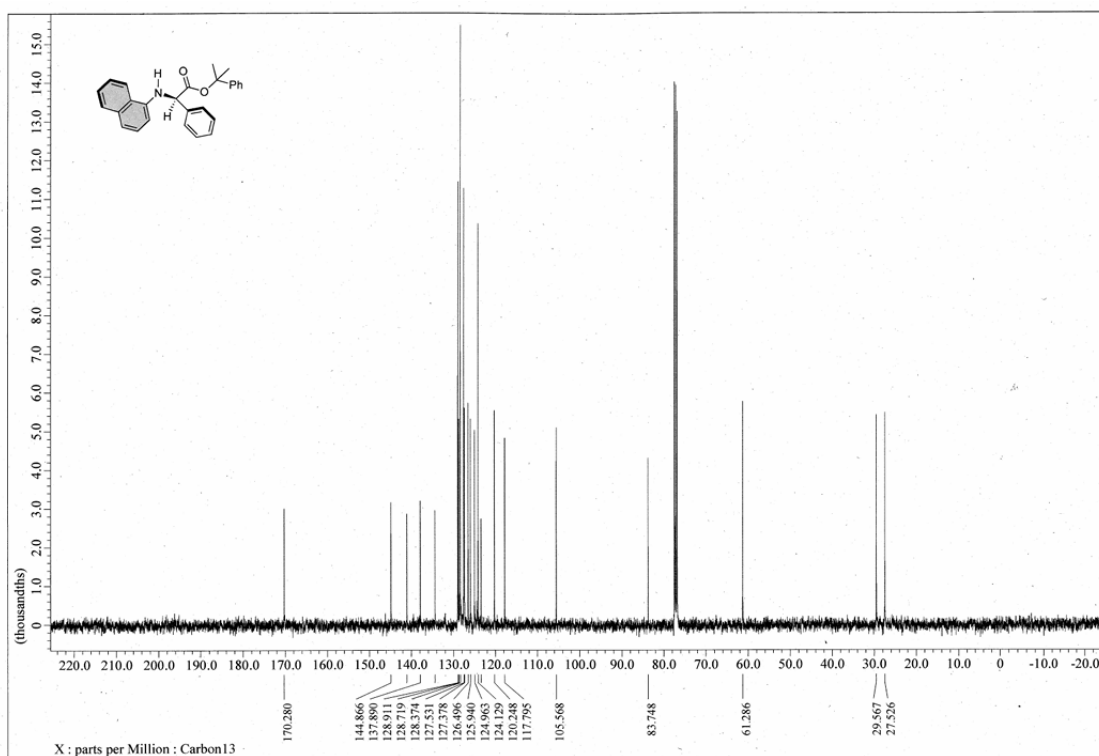

4

1

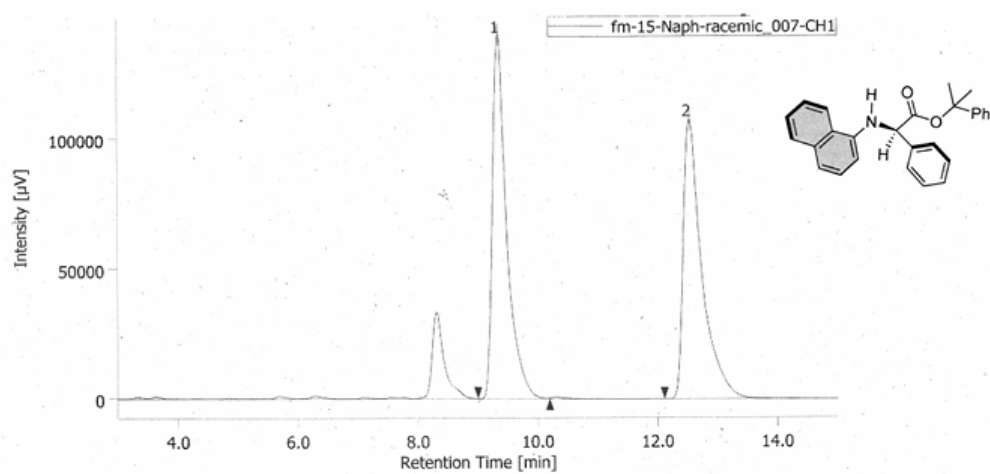

| # | tR [min] | Area [µV.sec] | Area%  | Height [µV] | Height% |
|---|----------|---------------|--------|-------------|---------|
| 1 | 9.342    | 2316307       | 49.925 | 140770      | 56.600  |
| 2 | 12.533   | 2323237       | 50.075 | 107941      | 43.400  |

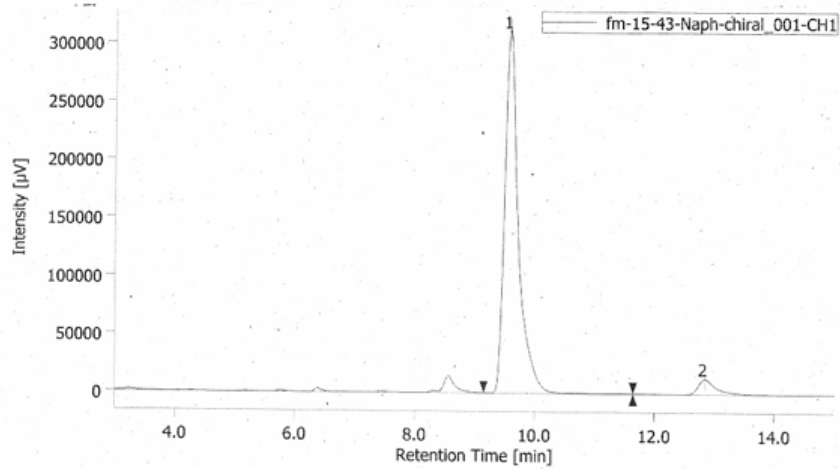

| # | tR [min] | Area [µV.sec] | Area%  | Height [µV] | Height% |
|---|----------|---------------|--------|-------------|---------|
| 1 | 9.567    | 4978078       | 94.789 | 312670      | 95.975  |
| 2 | 12.842   | 273694        | 5.211  | 13114       | 4.025   |

2  
3  
4  
5  
6

1  
2

3p

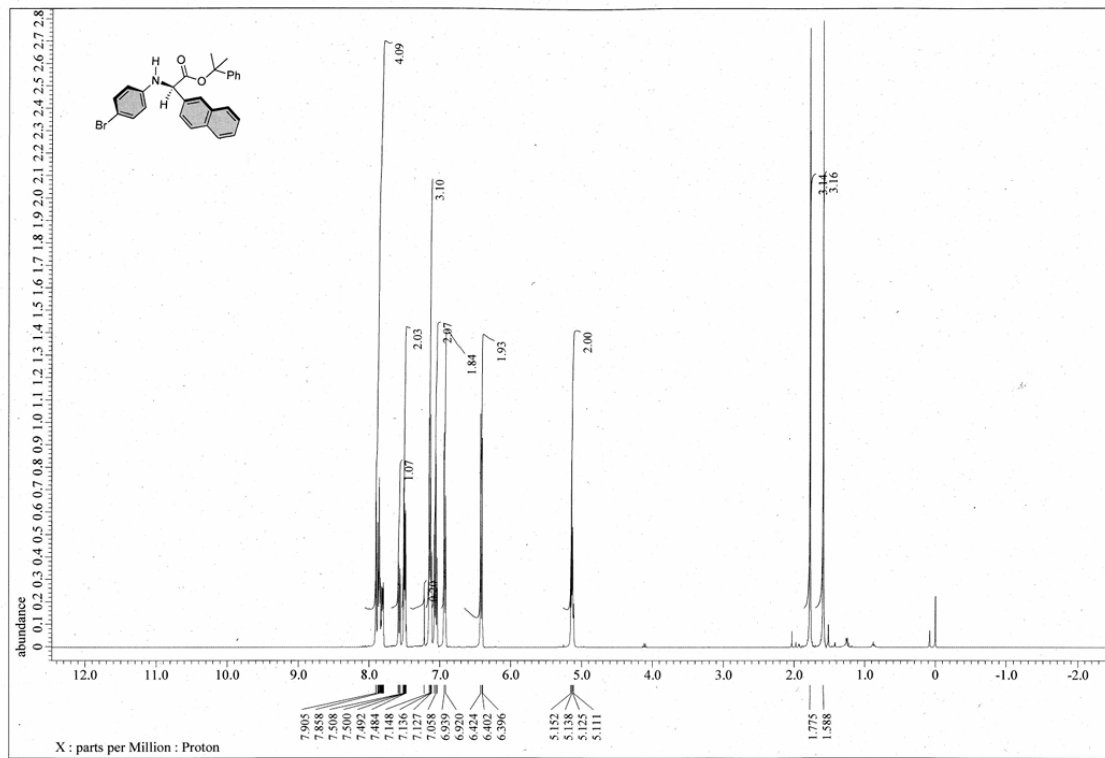

3

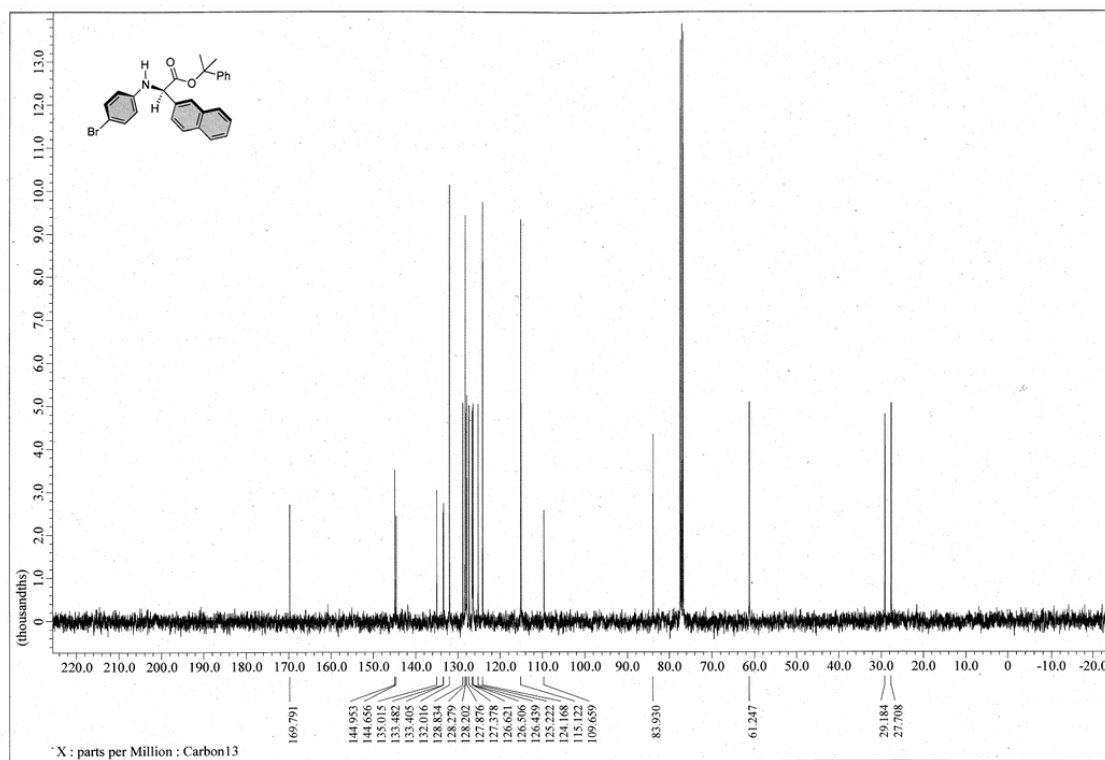

4

1

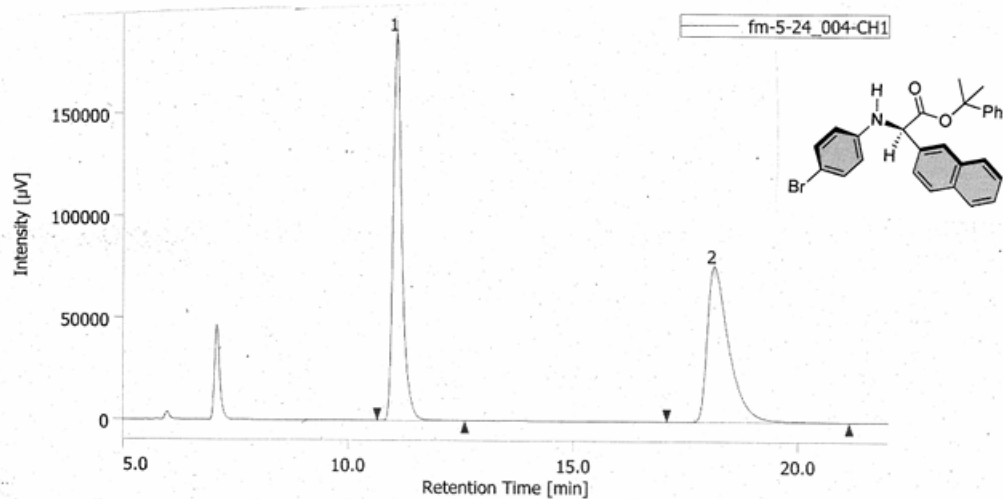

| # | tR (min) | Area [ $\mu\text{V}\cdot\text{sec}$ ] | Area%  | Height [ $\mu\text{V}$ ] | Height% |
|---|----------|---------------------------------------|--------|--------------------------|---------|
| 1 | 11.067   | 2578944                               | 50.298 | 190152                   | 71.361  |
| 2 | 18.133   | 2548352                               | 49.702 | 76313                    | 28.639  |

0612 yk-ts-08-573\_001 2026/06/16 4:29:10

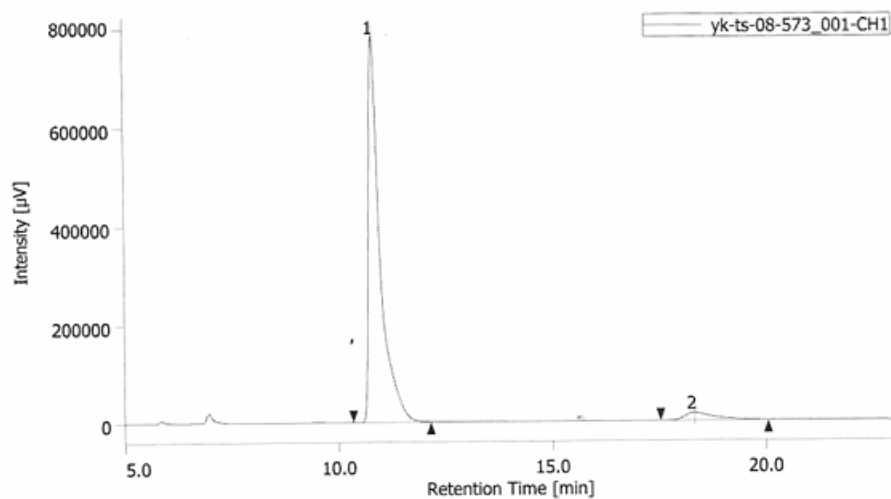

| # | tR (min) | Area [ $\mu\text{V}\cdot\text{sec}$ ] | Area%  | Height [ $\mu\text{V}$ ] | Height% |
|---|----------|---------------------------------------|--------|--------------------------|---------|
| 1 | 10.825   | 14617732                              | 95.270 | 785010                   | 98.061  |
| 2 | 18.317   | 725751                                | 4.730  | 15524                    | 1.939   |

2

3

1

3q

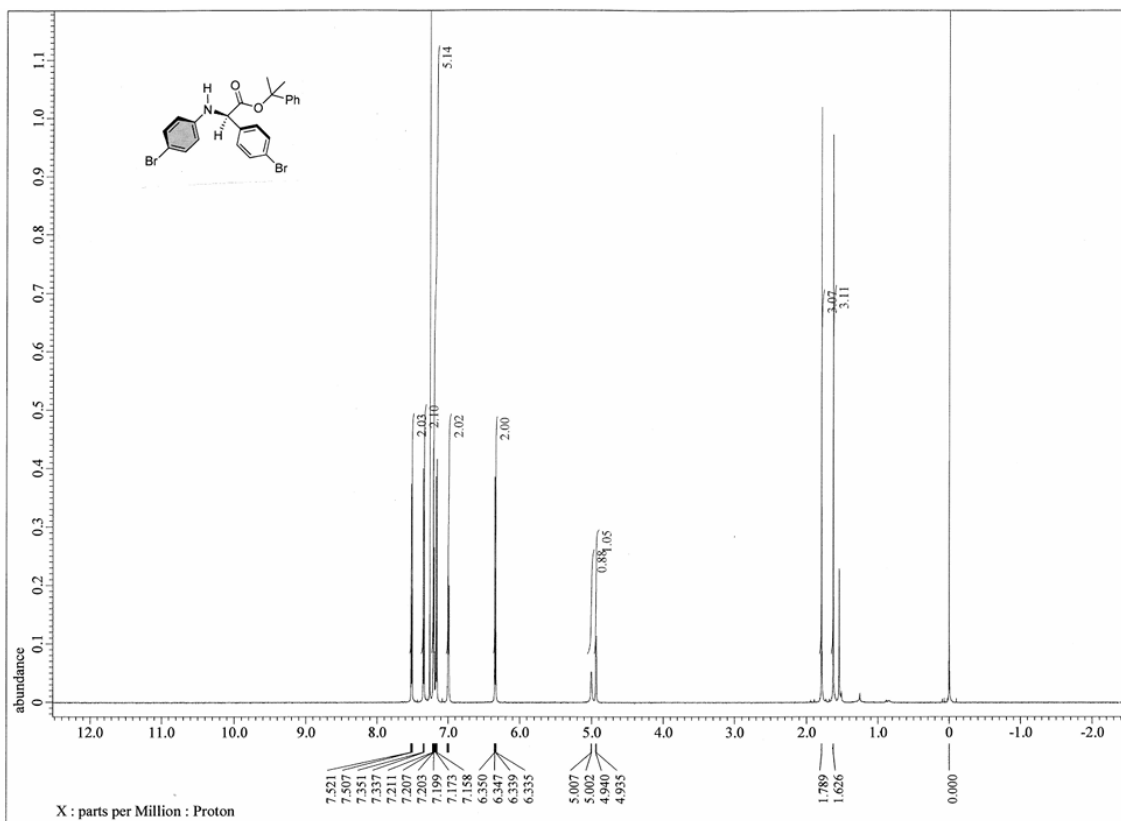

2

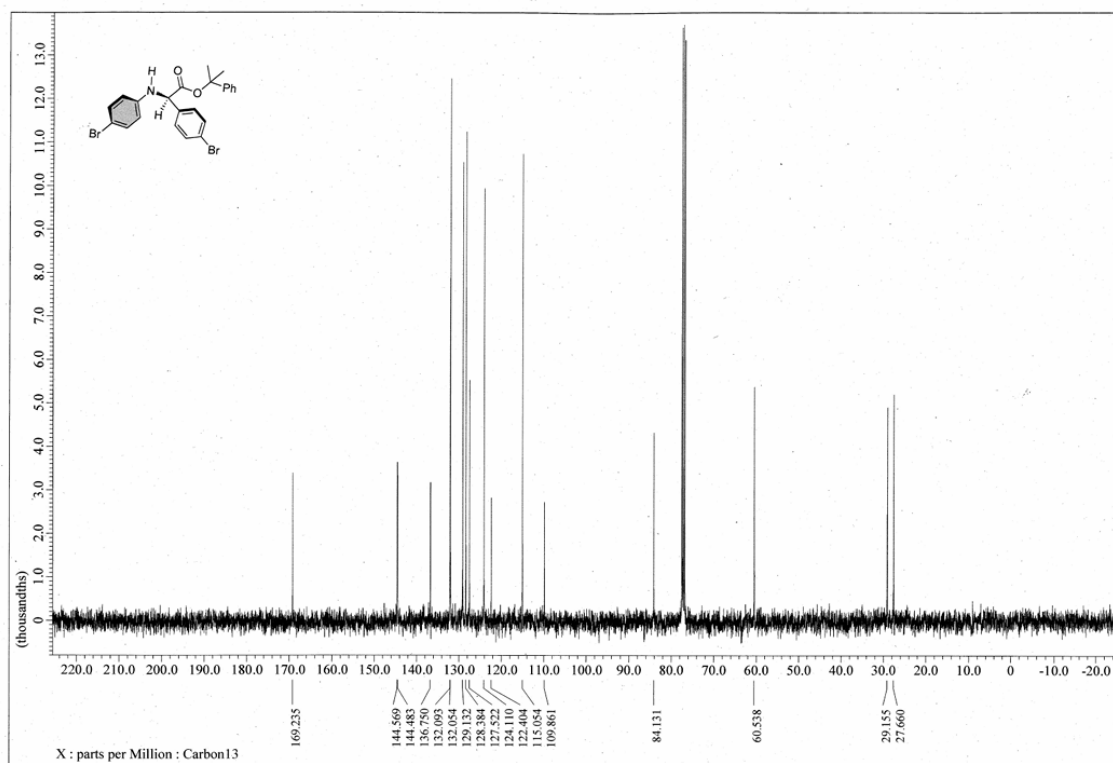

3

1

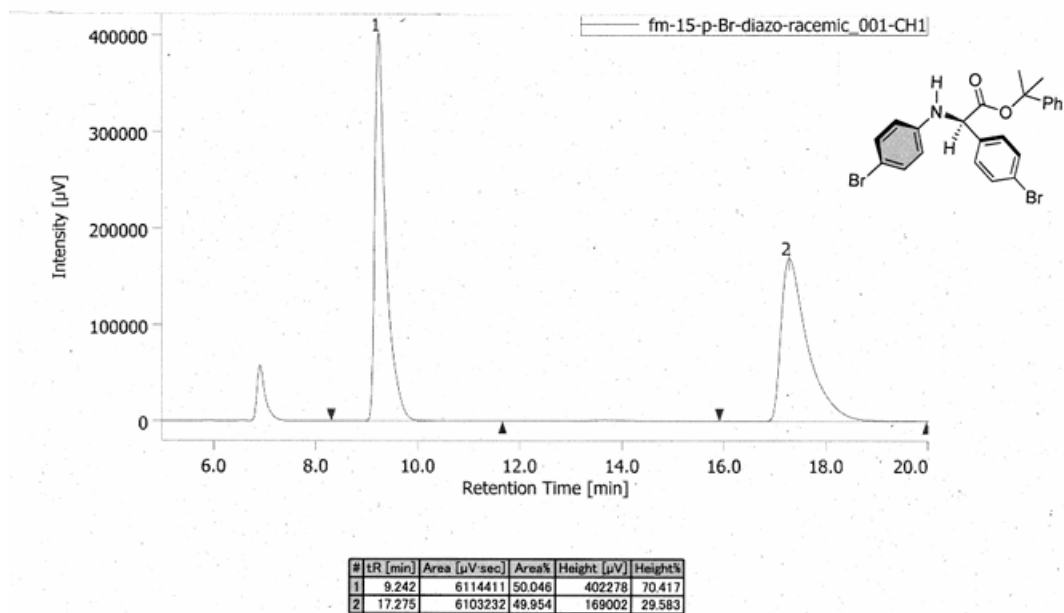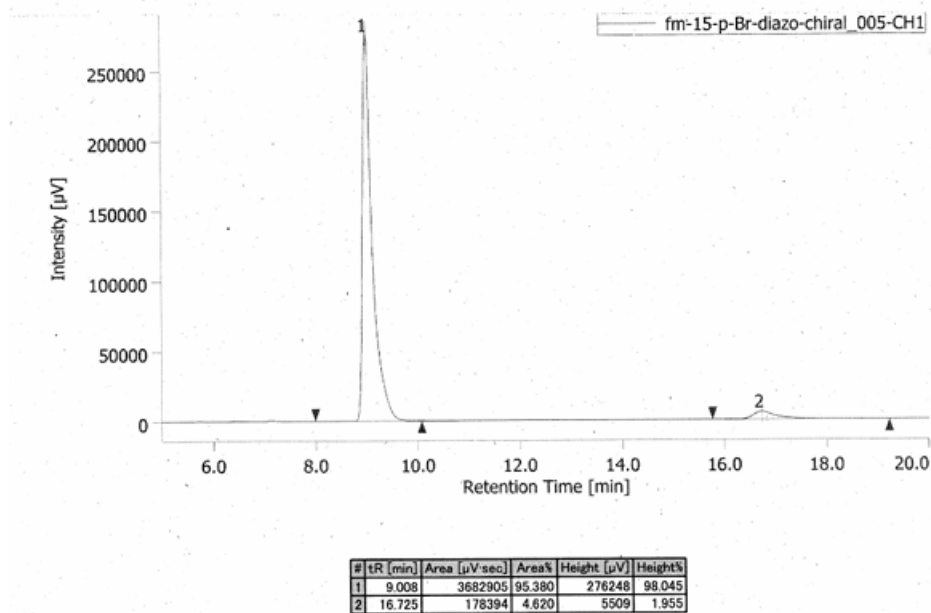

2

3

1  
2

3r

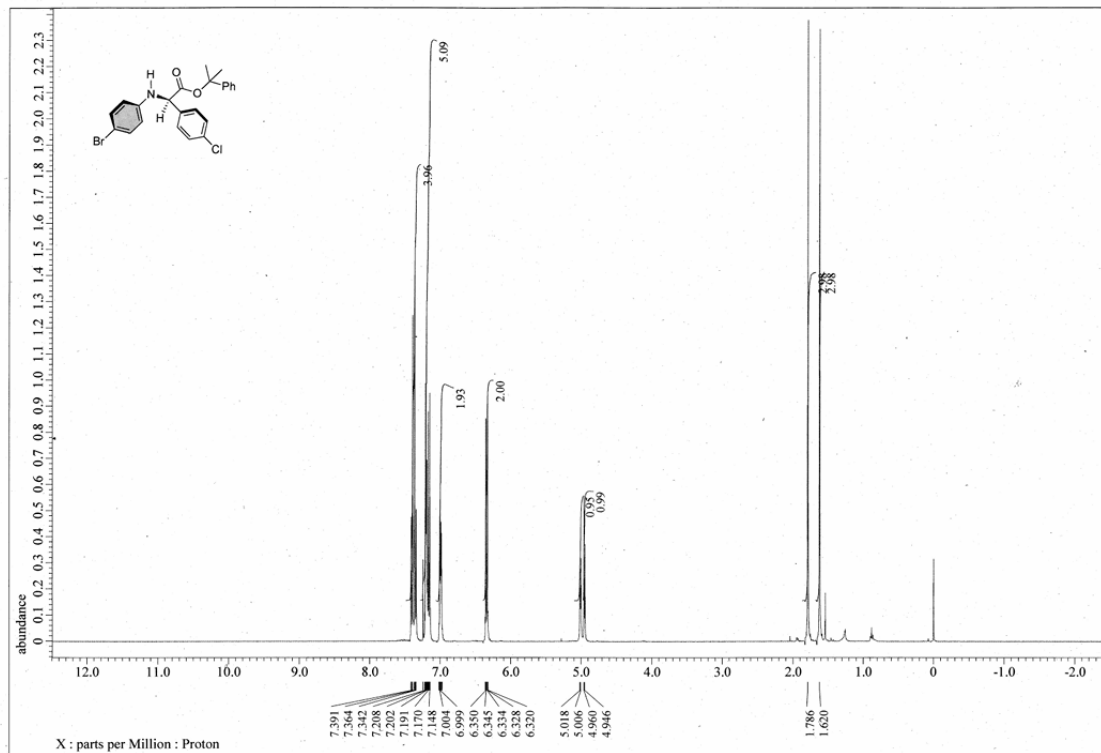

3

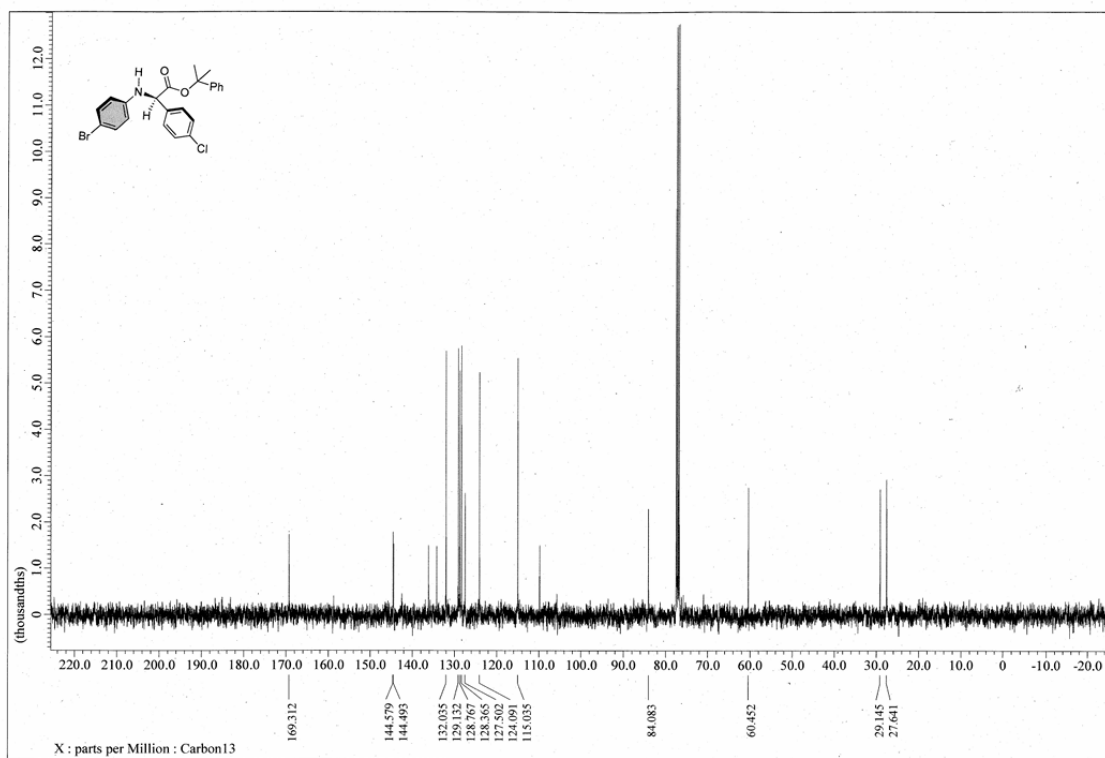

4

1

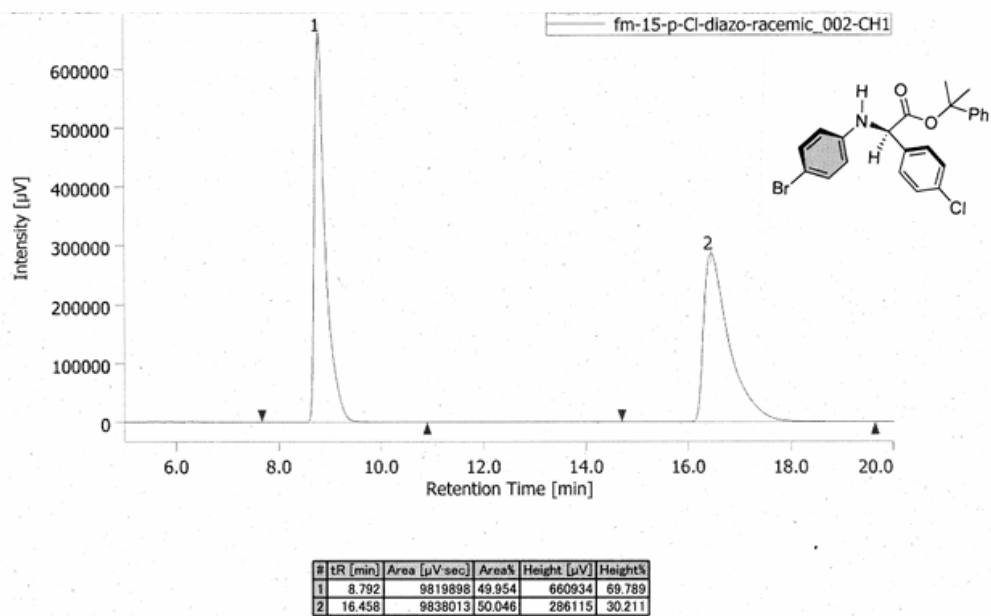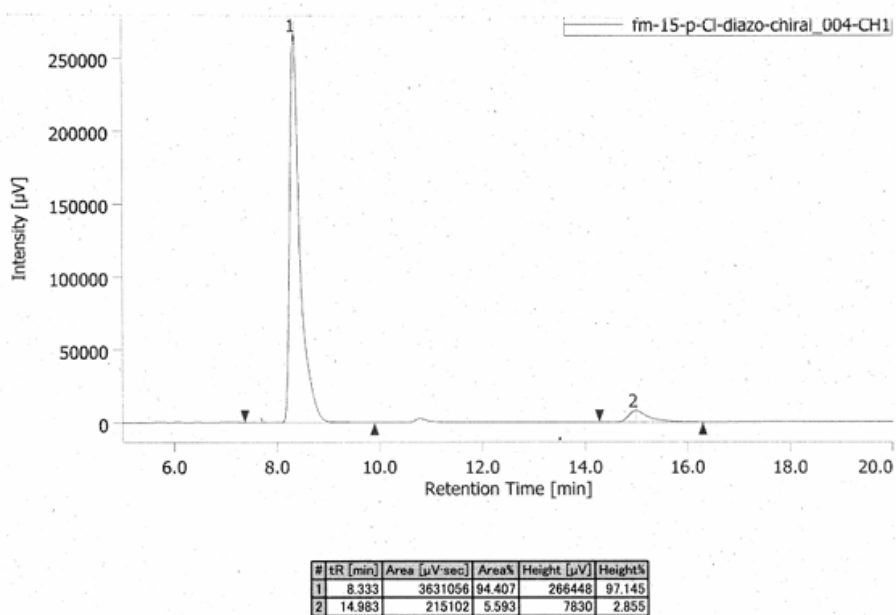

2

3

4

1  
2

3s

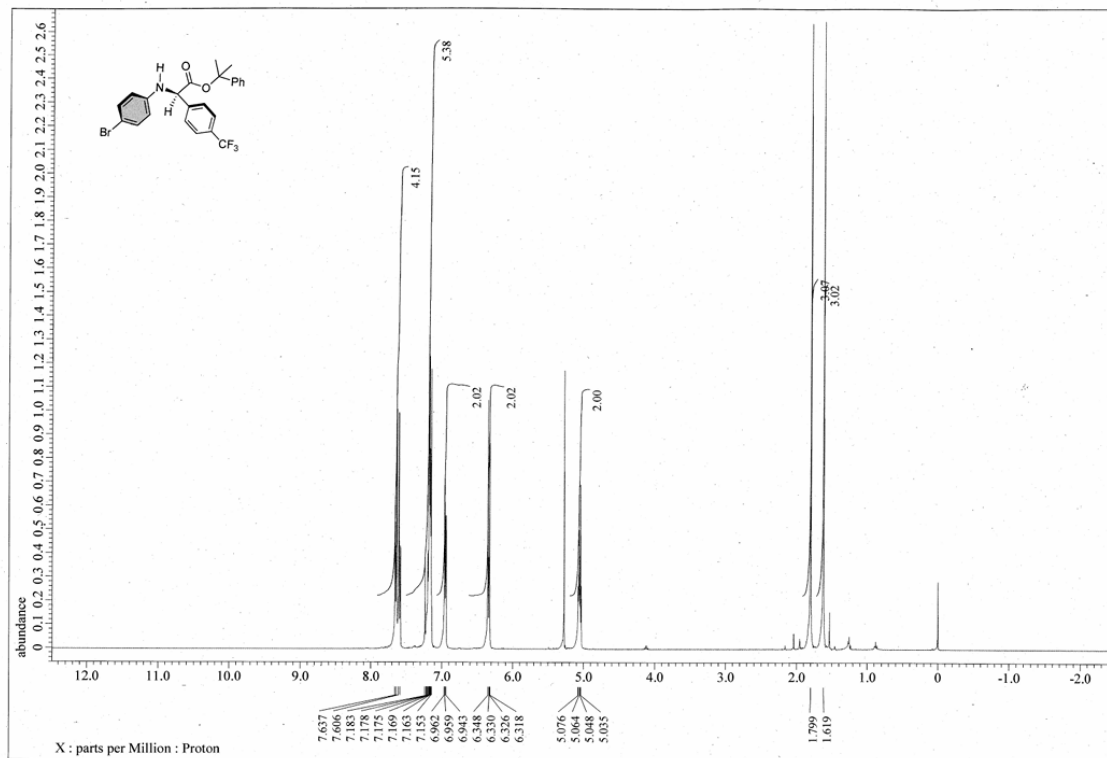

3

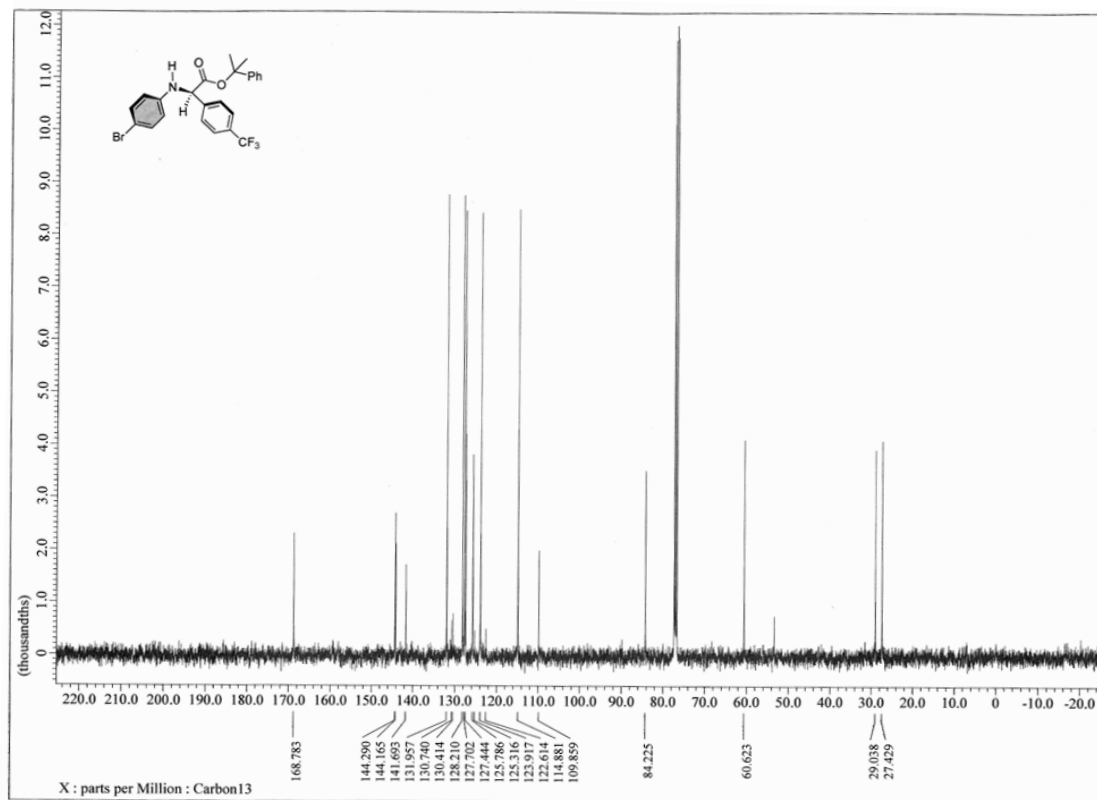

1

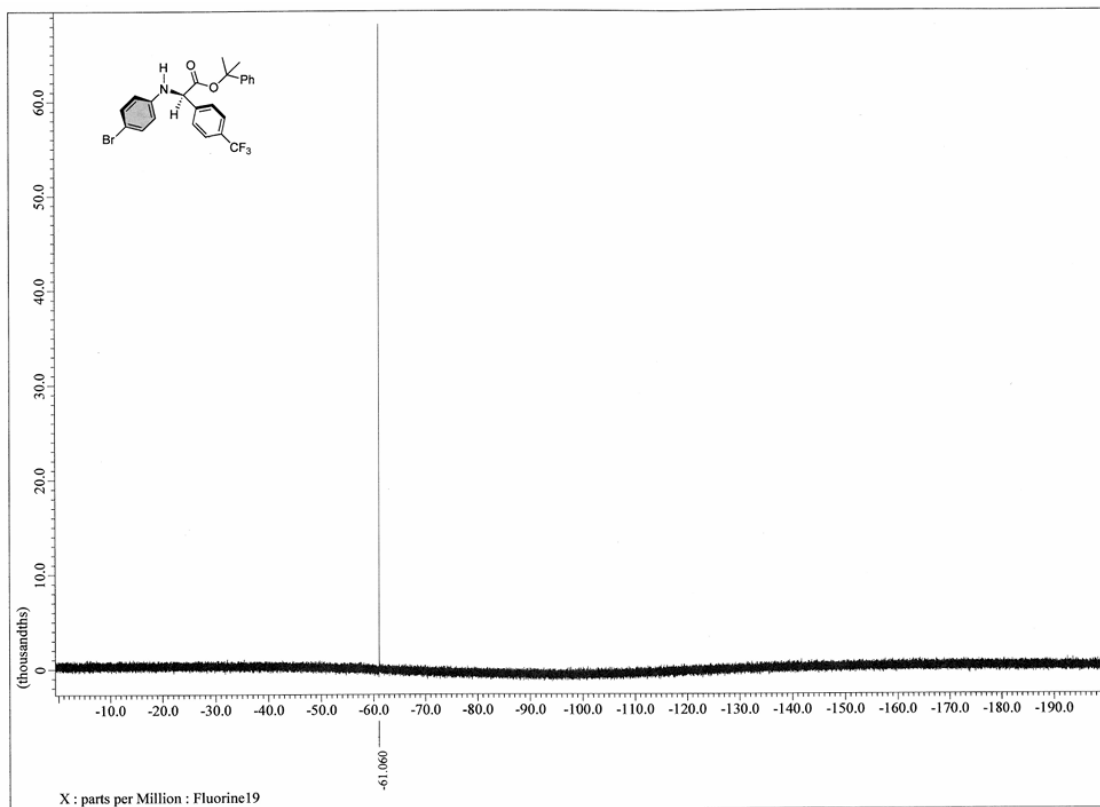

2

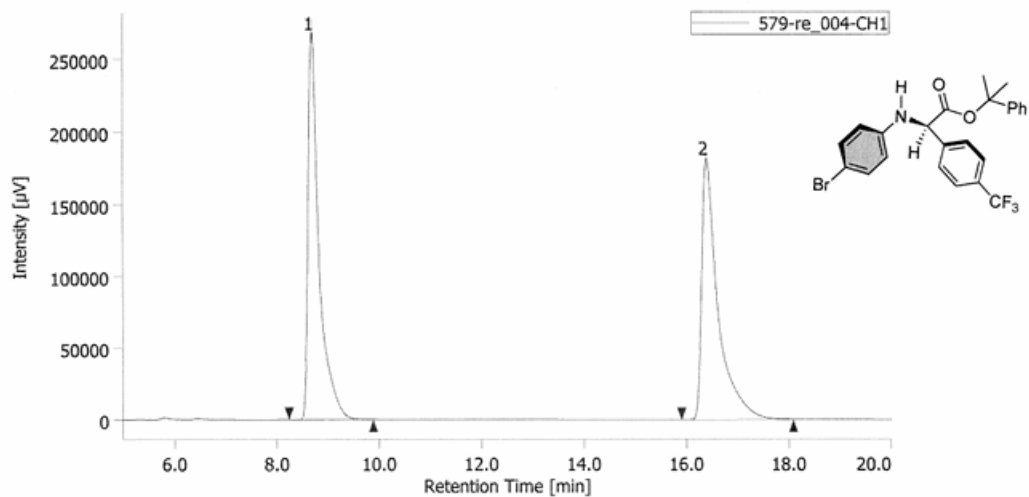

| # | tR [min] | Area [ $\mu\text{V}\cdot\text{sec}$ ] | Area%  | Height [ $\mu\text{V}$ ] [ $\mu\text{V}$ ] | Height% |
|---|----------|---------------------------------------|--------|--------------------------------------------|---------|
| 1 | 8.700    | 4007836                               | 49.947 | 268938                                     | 59.655  |
| 2 | 16.408   | 4016386                               | 50.053 | 181881                                     | 40.345  |

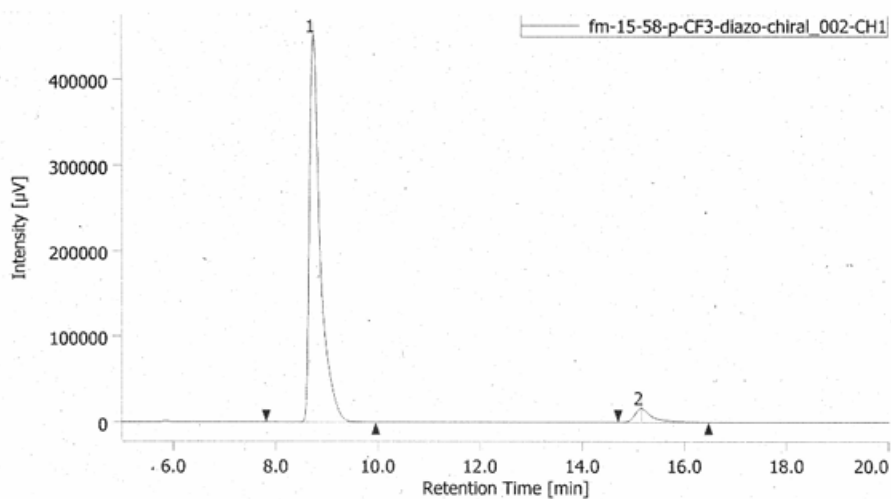

| # | tR [min] | Area [ $\mu\text{V}\cdot\text{sec}$ ] | Area%  | Height [ $\mu\text{V}$ ] [ $\mu\text{V}$ ] | Height% |
|---|----------|---------------------------------------|--------|--------------------------------------------|---------|
| 1 | 8.742    | 6589508                               | 94.611 | 452937                                     | 96.580  |
| 2 | 15.150   | 375321                                | 5.389  | 16039                                      | 3.420   |

1

3t

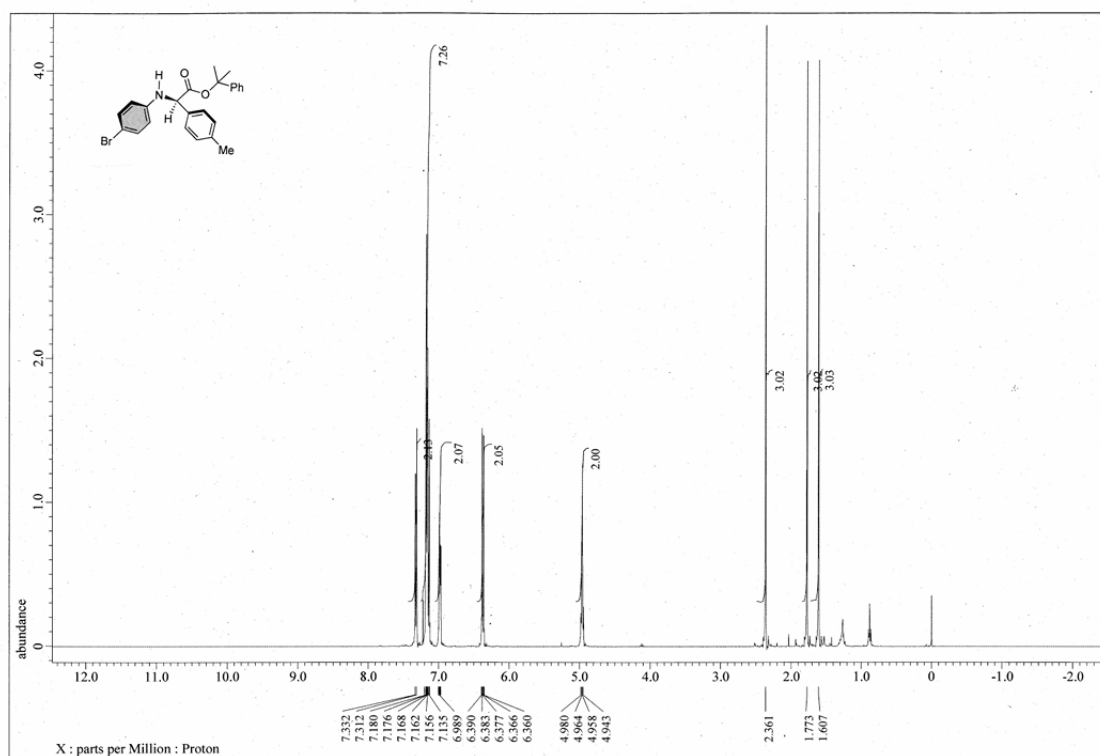

2

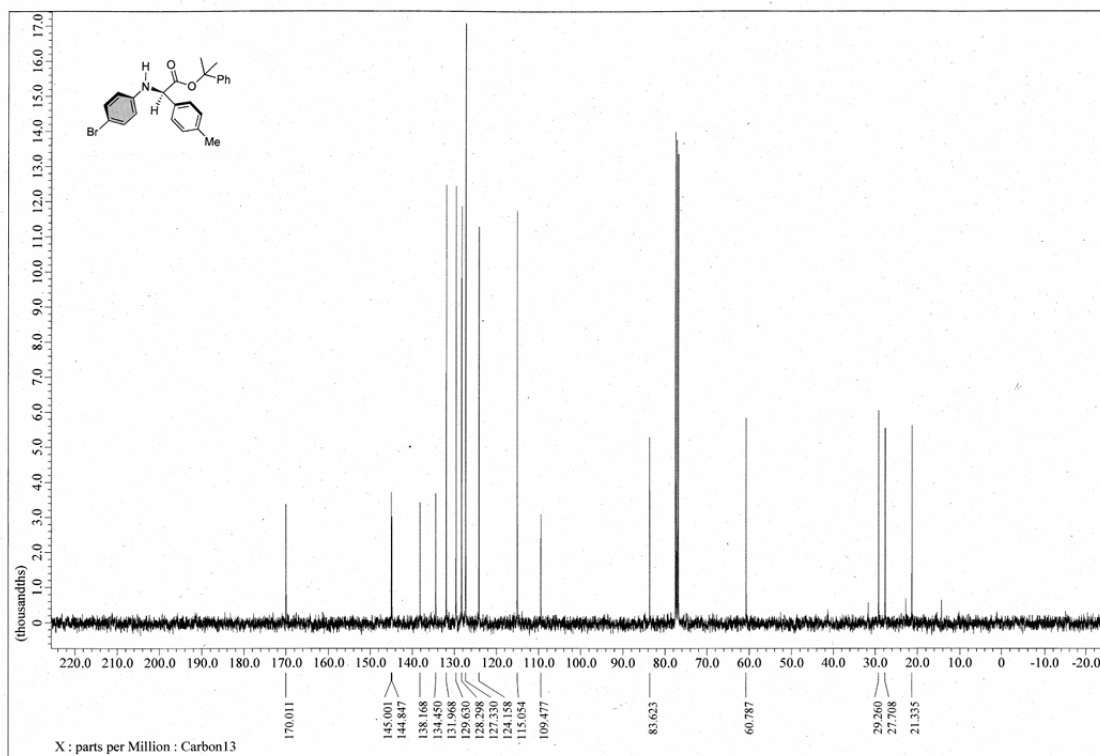

3

4

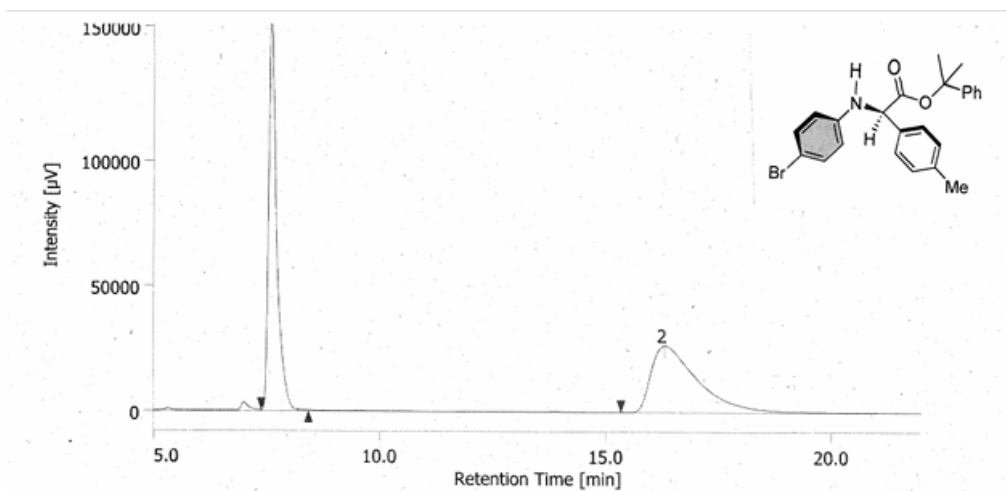

| # | tR [min] | Area [μV·sec] | Area%  | Height [μV] | Height% |
|---|----------|---------------|--------|-------------|---------|
| 1 | 7.600    | 1960584       | 50.237 | 155787      | 85.402  |
| 2 | 16.317   | 1942091       | 49.763 | 26629       | 14.598  |

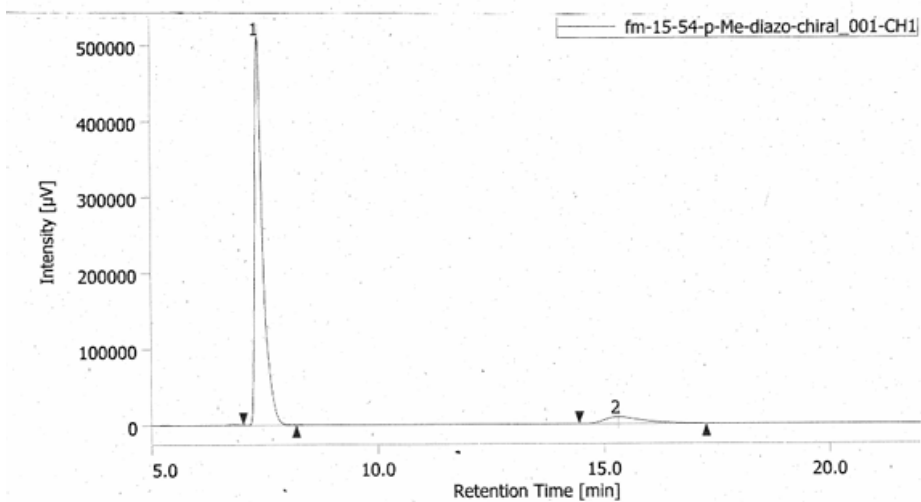

| # | tR [min] | Area [μV·sec] | Area%  | Height [μV] | Height% |
|---|----------|---------------|--------|-------------|---------|
| 1 | 7.367    | 6260759       | 92.298 | 510568      | 98.311  |
| 2 | 15.308   | 522479        | 7.702  | 8771        | 1.689   |

- 1
- 2
- 3
- 4

1

3u

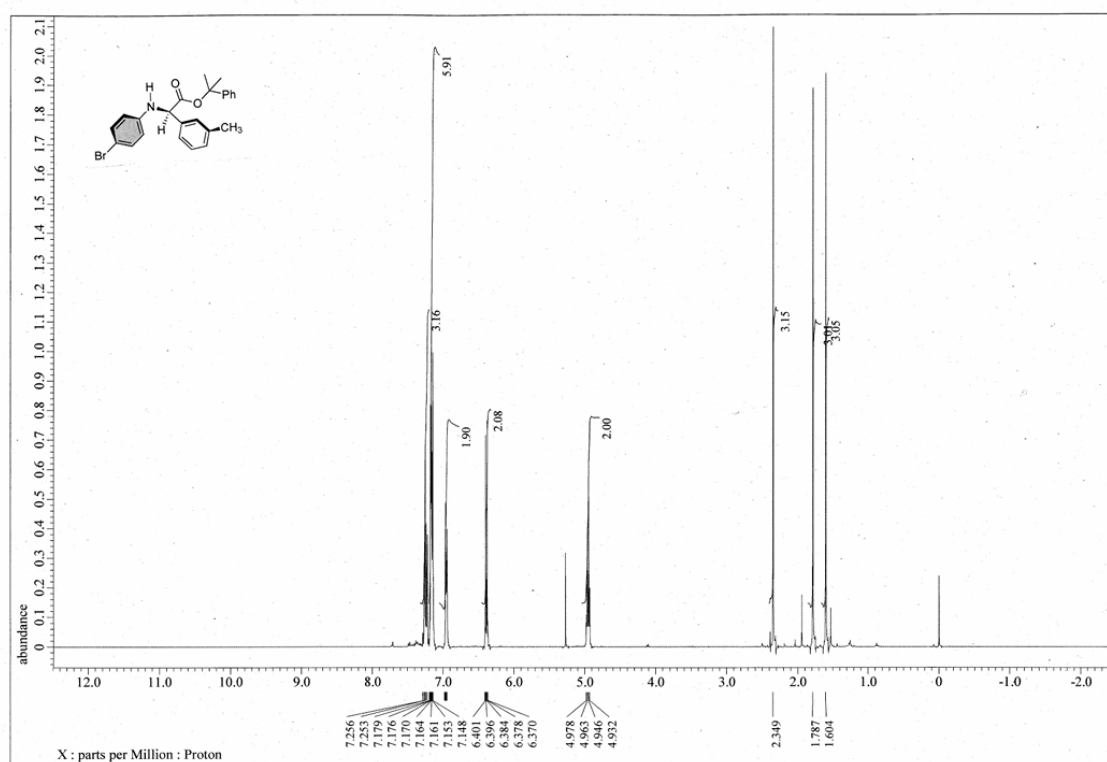

2

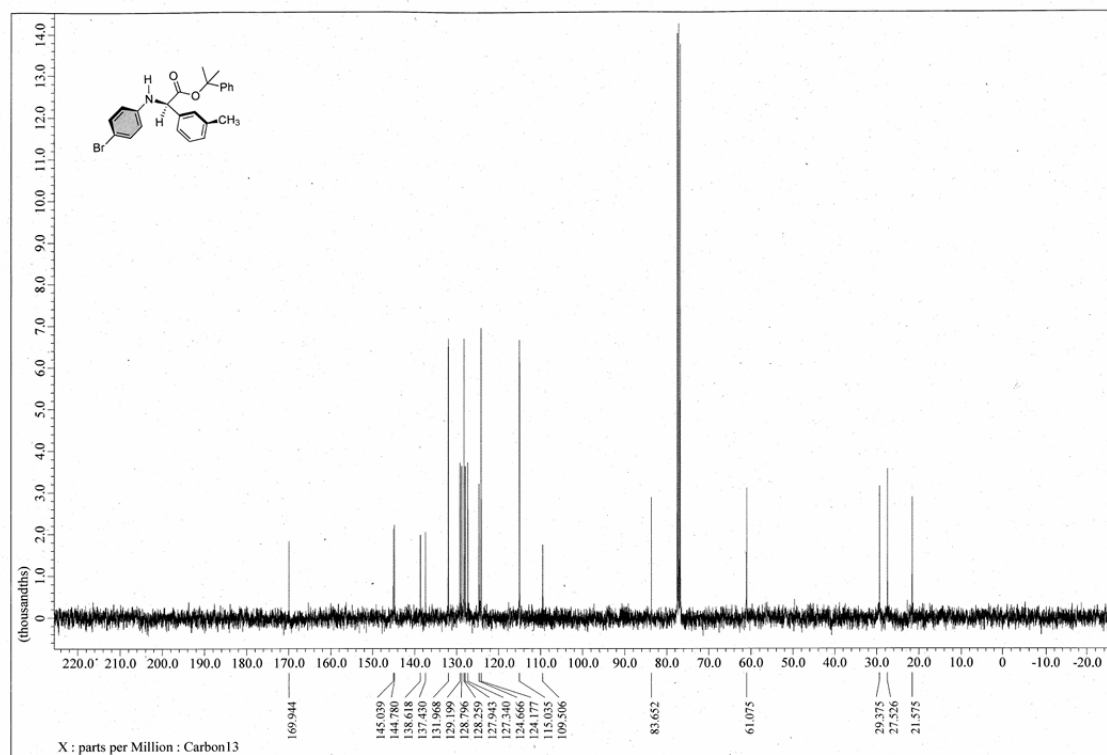

3

4

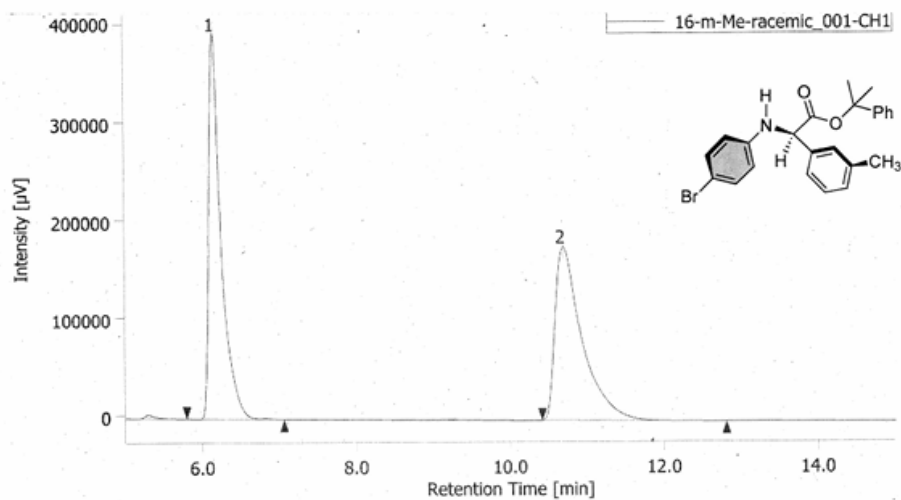

| # | tR [min] | Area [µV·sec] | Area%  | Height [µV] | Height% |
|---|----------|---------------|--------|-------------|---------|
| 1 | 6.158    | 4323987       | 50.194 | 394745      | 68.998  |
| 2 | 10.700   | 4290580       | 49.806 | 177370      | 31.002  |

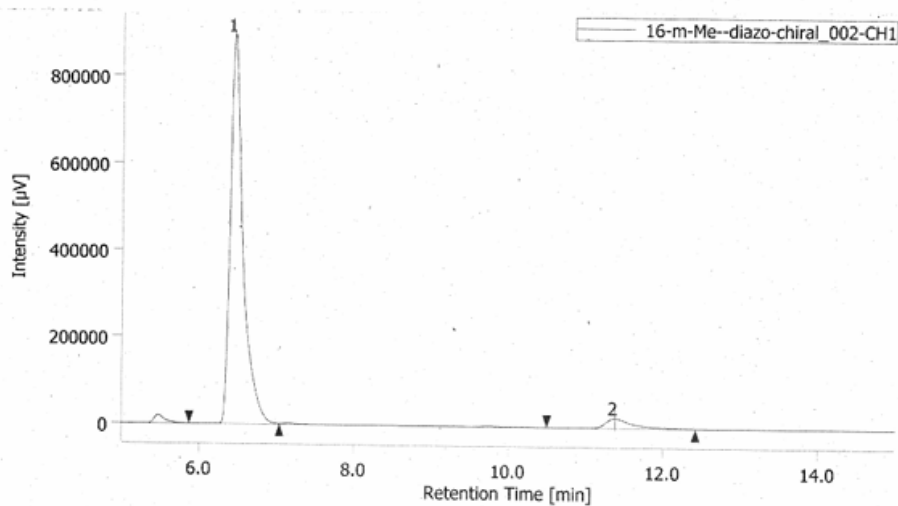

| # | tR [min] | Area [µV·sec] | Area%  | Height [µV] | Height% |
|---|----------|---------------|--------|-------------|---------|
| 1 | 6.442    | 10286464      | 95.098 | 898660      | 97.588  |
| 2 | 11.383   | 530239        | 4.902  | 22212       | 2.412   |

1  
2  
3

1

3v

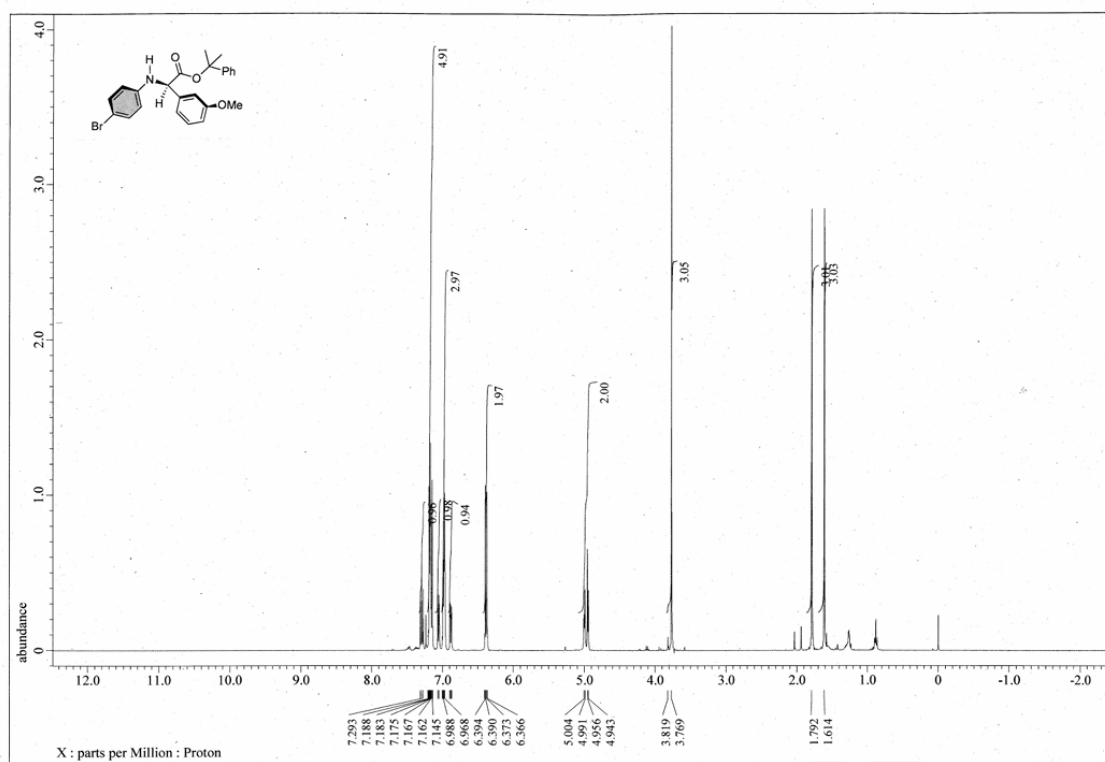

2

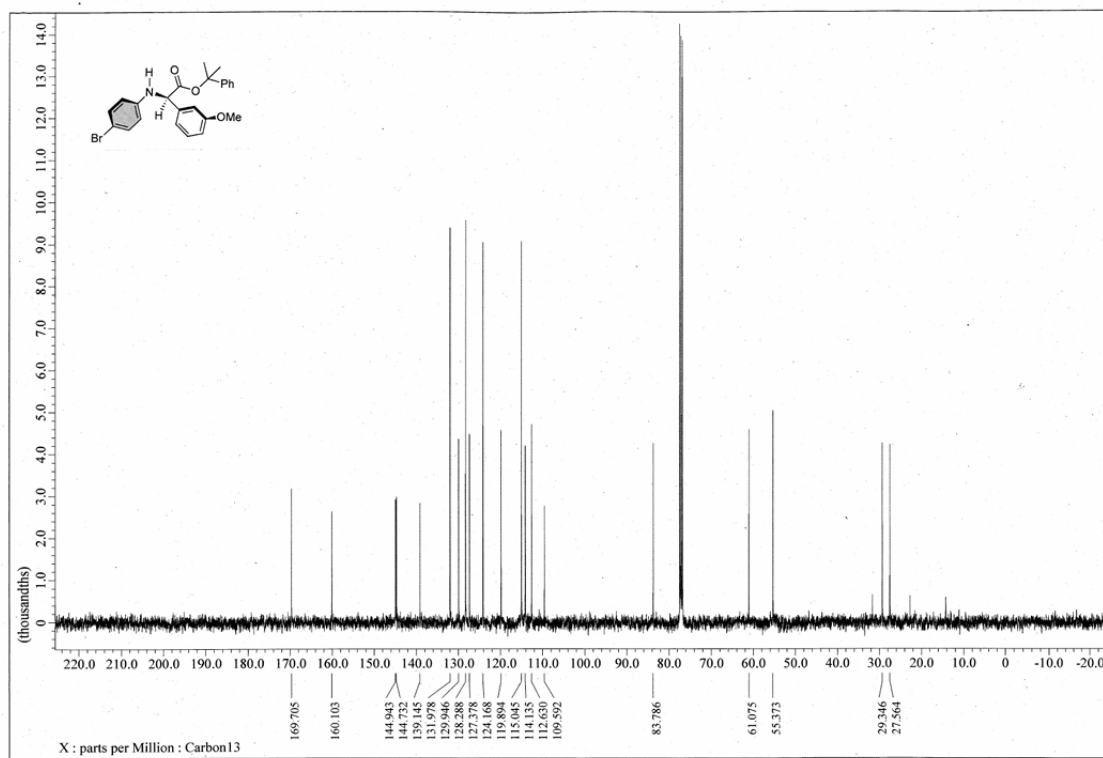

3

4

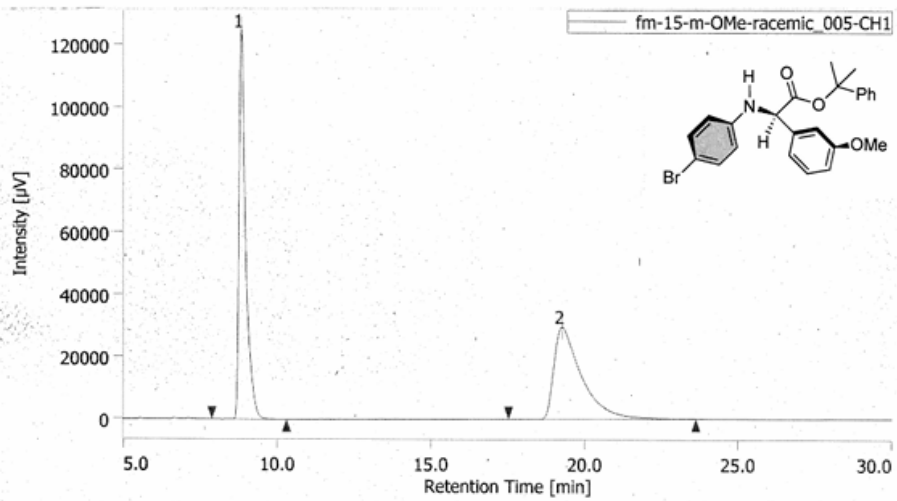

| # | tR [min] | Area [µV·sec] | Area%  | Height [µV] | Height% |
|---|----------|---------------|--------|-------------|---------|
| 1 | 8.842    | 1870275       | 50.401 | 125093      | 80.854  |
| 2 | 19.275   | 1840500       | 49.599 | 29821       | 19.146  |

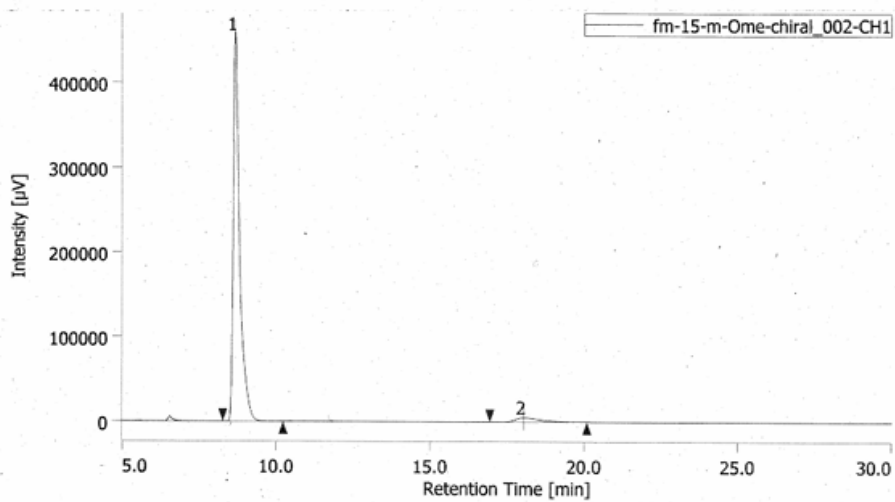

| # | tR [min] | Area [µV·sec] | Area%  | Height [µV] | Height% |
|---|----------|---------------|--------|-------------|---------|
| 1 | 8.675    | 6727676       | 96.004 | 459302      | 98.936  |
| 2 | 18.050   | 279993        | 3.996  | 4941        | 1.064   |

- 1
- 2
- 3

1

3w

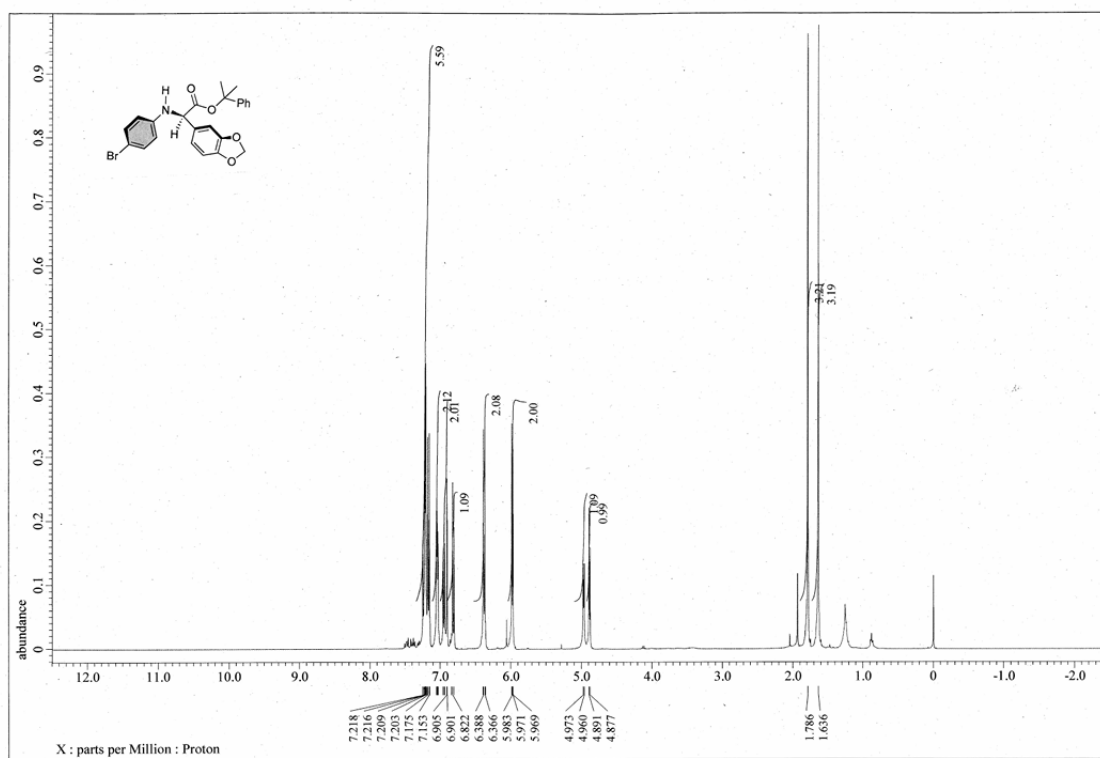

2

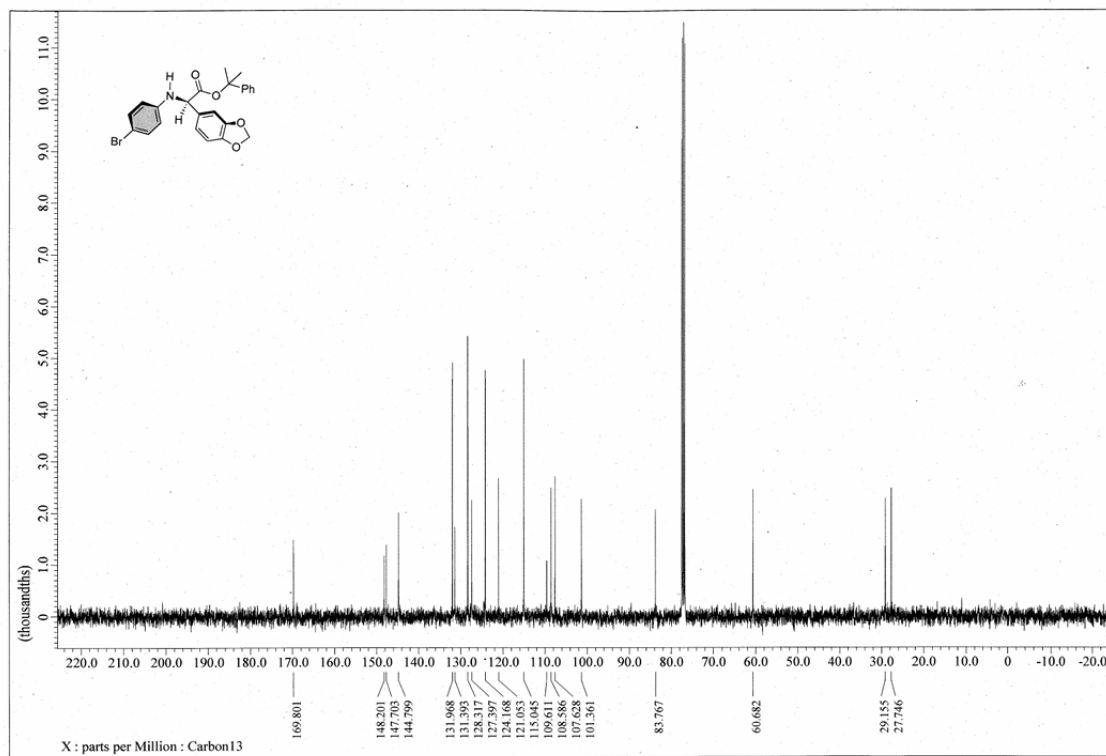

3

4

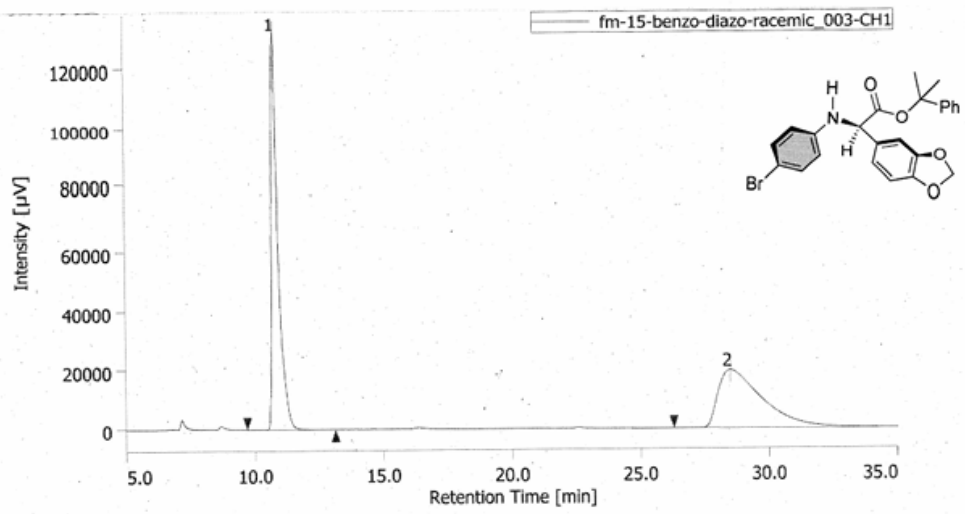

| # | tR [min] | Area [µV·sec] | Area%  | Height [µV] | Height% |
|---|----------|---------------|--------|-------------|---------|
| 1 | 10.800   | 2360433       | 50.099 | 131915      | 87.032  |
| 2 | 28.483   | 2351073       | 49.901 | 19655       | 12.968  |

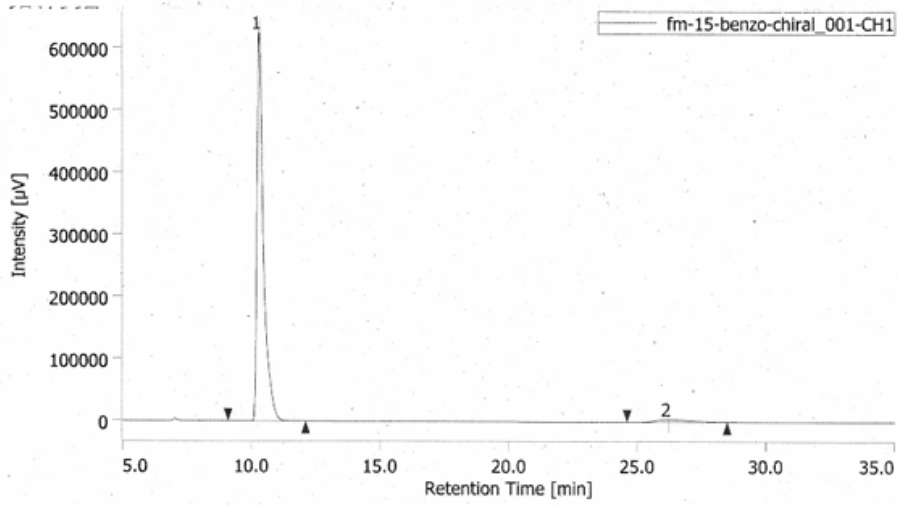

| # | tR [min] | Area [µV·sec] | Area%  | Height [µV] | Height% |
|---|----------|---------------|--------|-------------|---------|
| 1 | 10.308   | 11073607      | 96.557 | 628530      | 99.335  |
| 2 | 26.217   | 394847        | 3.443  | 4205        | 0.665   |

- 1
- 2
- 3

1

3x

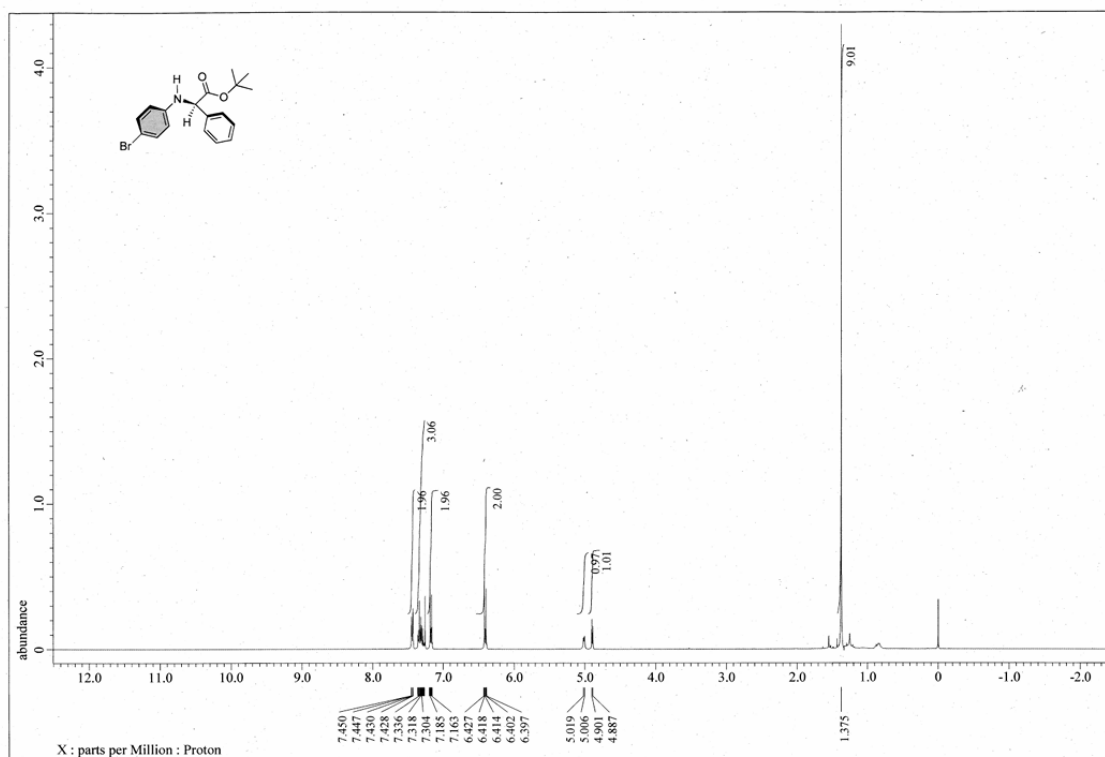

2

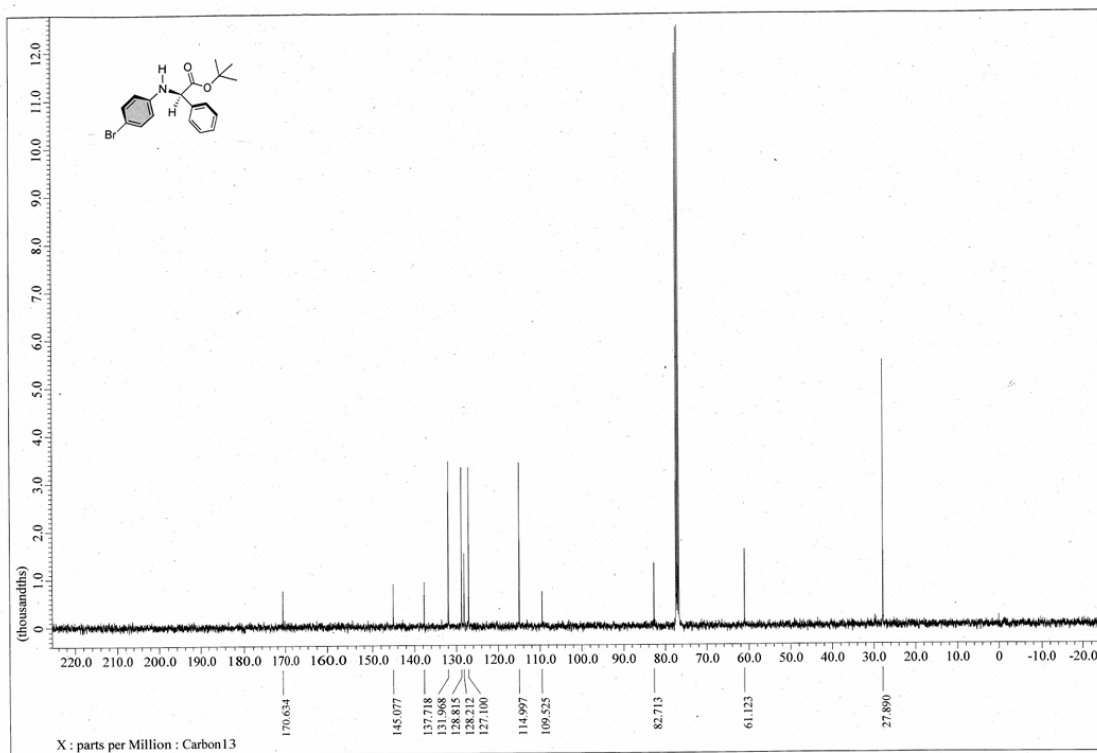

3

4

5

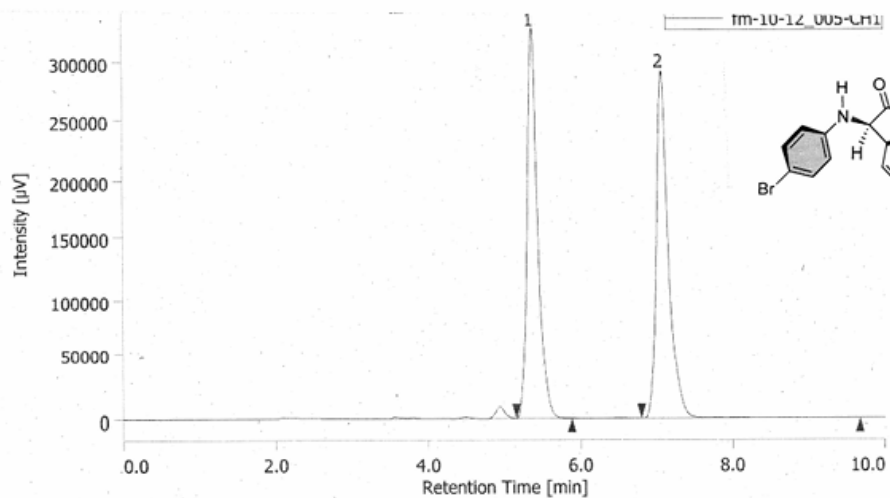

| # | tR [min] | Area [µV·sec] | Area%  | Height [µV] | Height% |
|---|----------|---------------|--------|-------------|---------|
| 1 | 5.375    | 3101856       | 49.870 | 328067      | 52.930  |
| 2 | 7.075    | 3117991       | 50.130 | 291745      | 47.070  |

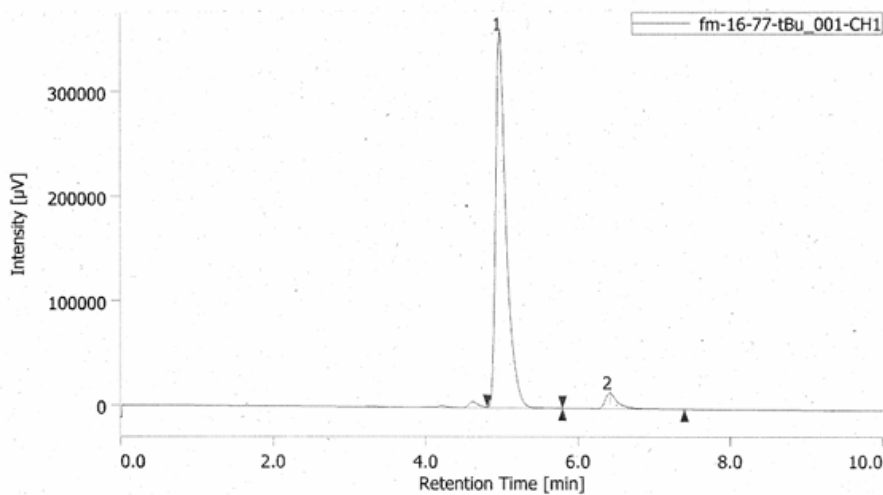

| # | tR [min] | Area [µV·sec] | Area%  | Height [µV] | Height% |
|---|----------|---------------|--------|-------------|---------|
| 1 | 4.975    | 3453041       | 95.355 | 360200      | 95.997  |
| 2 | 6.417    | 168216        | 4.645  | 15018       | 4.003   |

- 1
- 2
- 3
- 4

1

3y

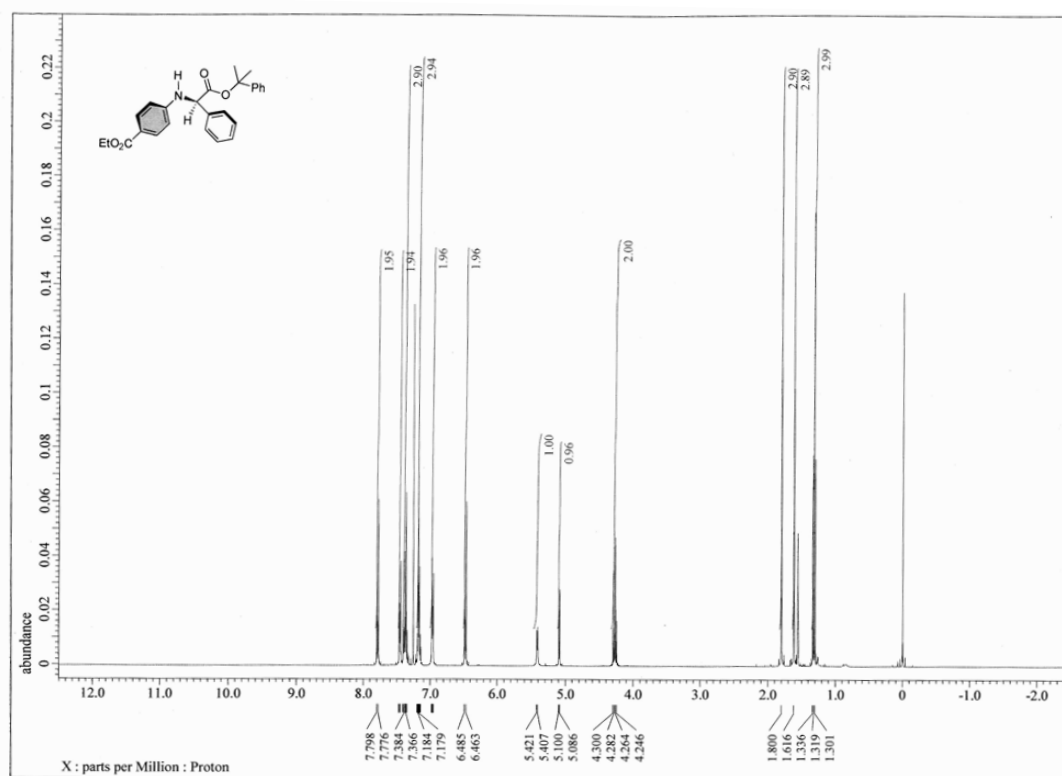

2

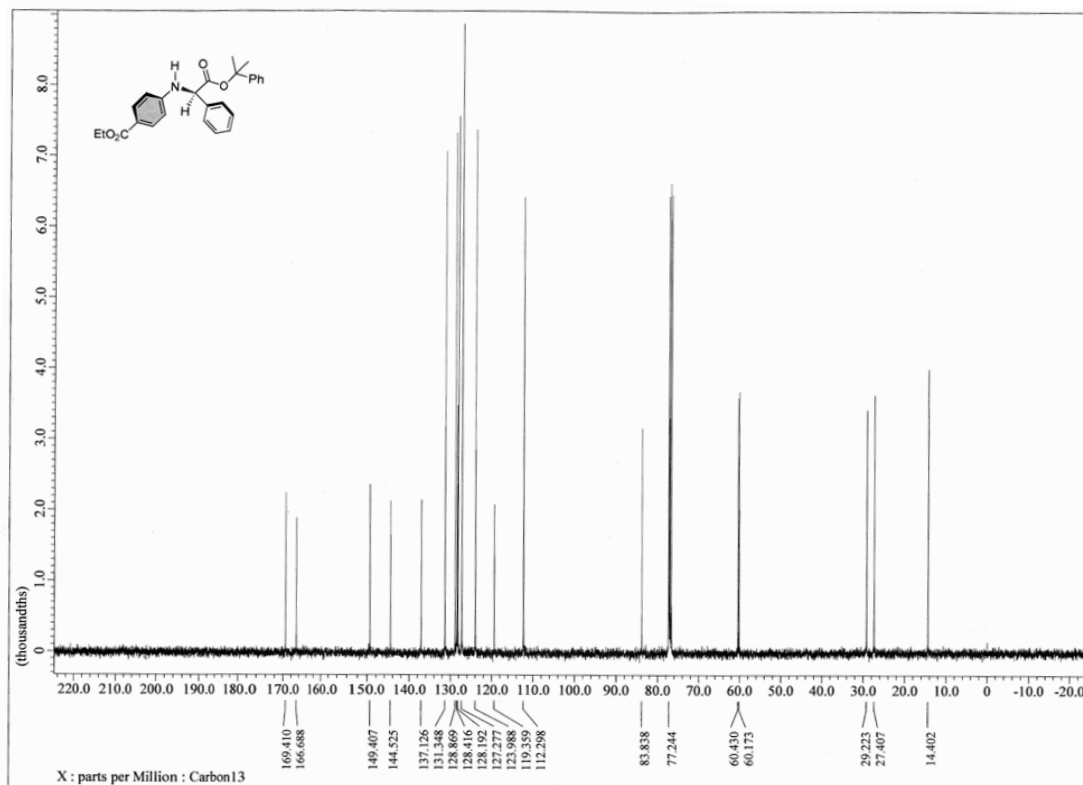

3

0529 yk-ts-03-186 p-CO<sub>2</sub>Me\_003 2026/05/07 16:09:56

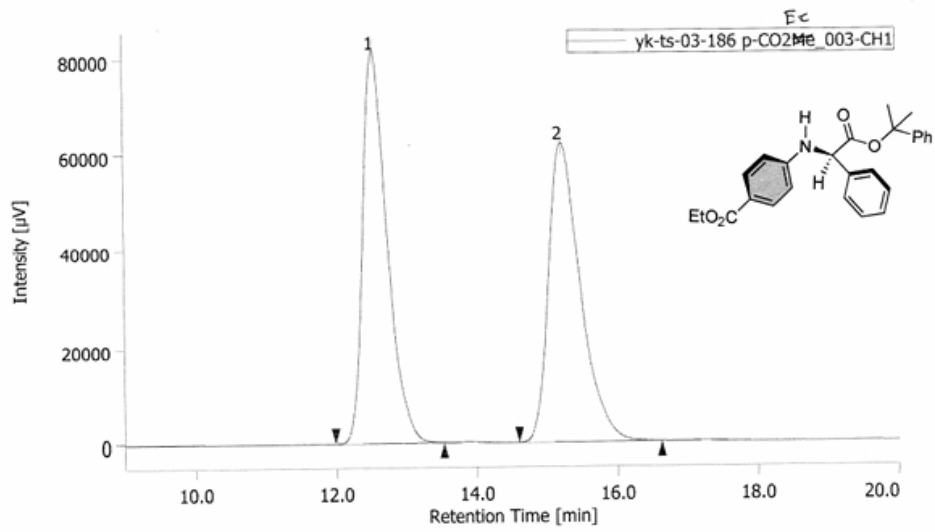

| # | tR [min] | Area [µV·sec] | Area%  | Height [µV] [µV] | Height% |
|---|----------|---------------|--------|------------------|---------|
| 1 | 12.558   | 1954277       | 50.163 | 81608            | 56.683  |
| 2 | 15.225   | 1941578       | 49.837 | 62363            | 43.317  |

0620 yk-ts-03-223-p-CO<sub>2</sub>Et\_003 2026/05/07 16:09:19

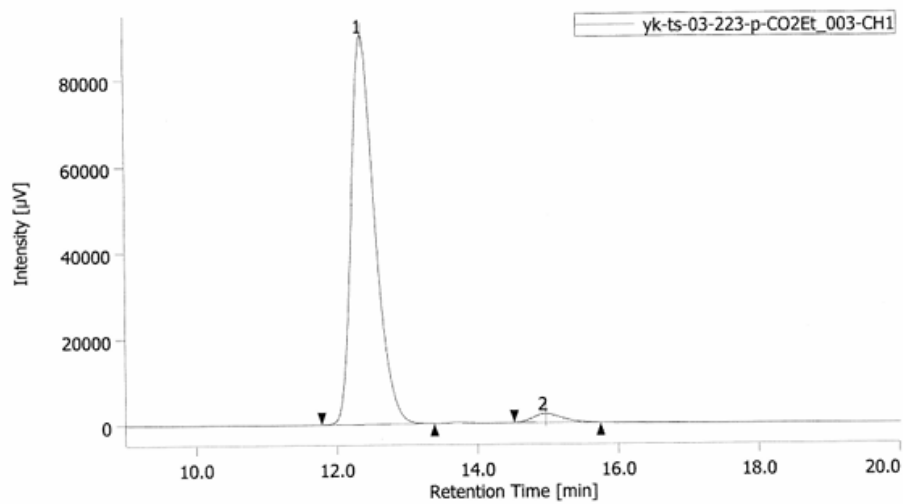

| # | tR [min] | Area [µV·sec] | Area%  | Height [µV] [µV] | Height% |
|---|----------|---------------|--------|------------------|---------|
| 1 | 12.375   | 2090641       | 97.208 | 90324            | 97.788  |
| 2 | 14.967   | 60058         | 2.792  | 2043             | 2.212   |

1

3z

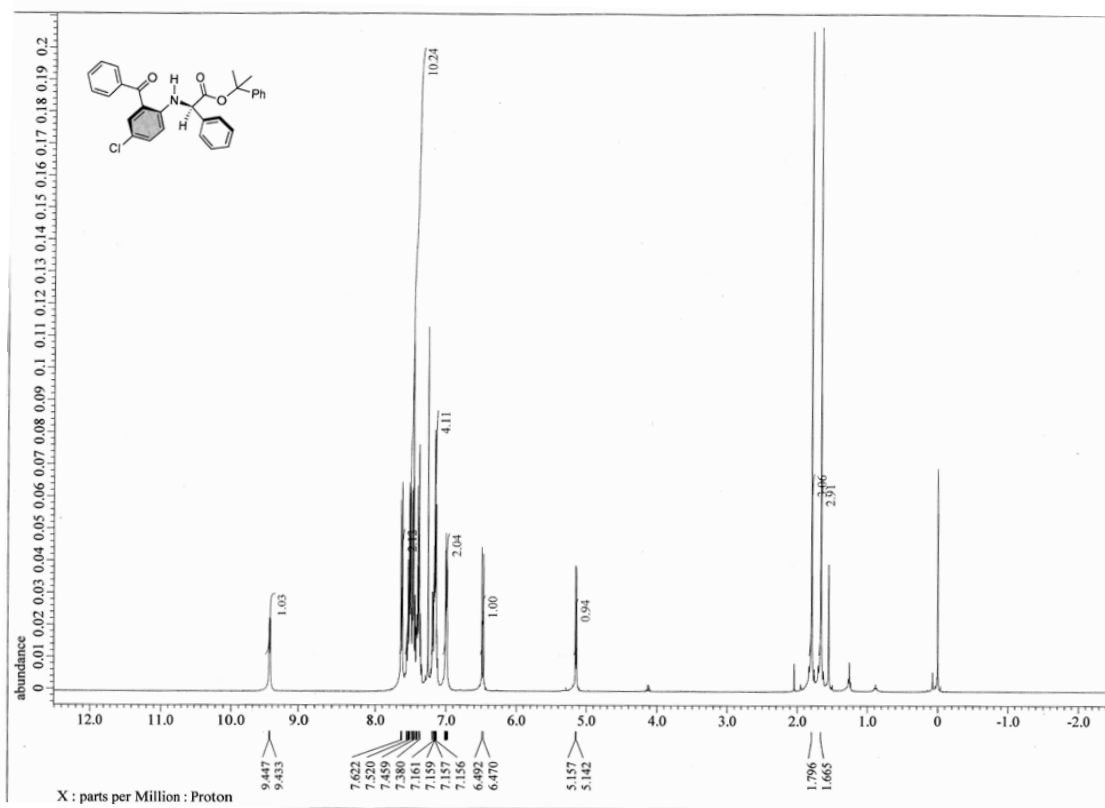

2

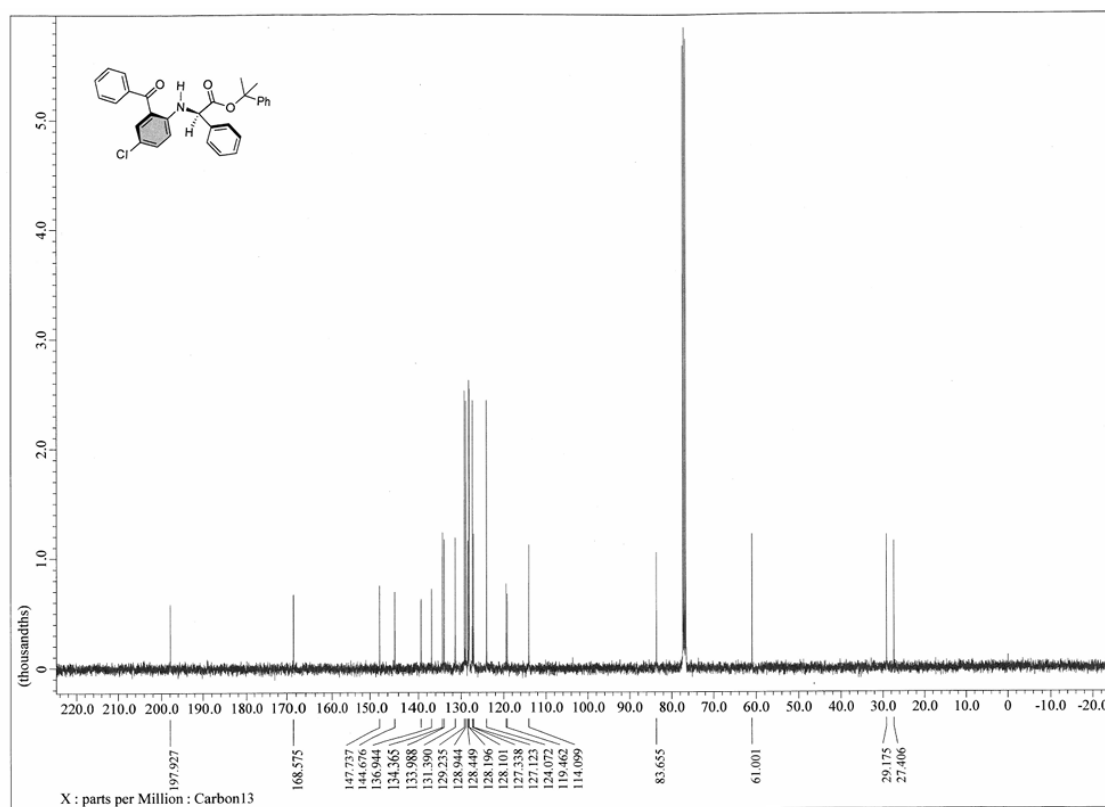

3

0714 yk-ts-247\_004 2026/05/16 9:42:09

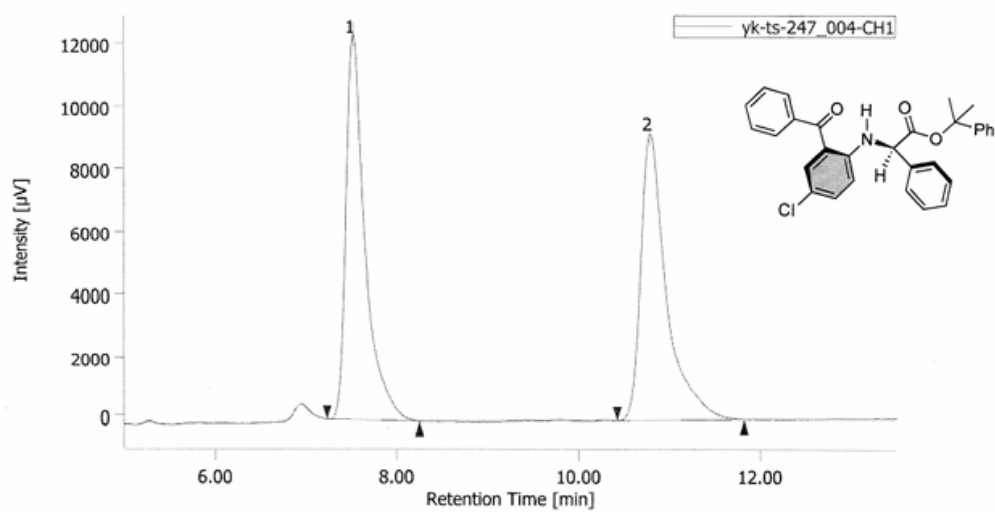

| # | tR [min] | Area [µV·sec] | Area%  | Height [µV] | Height% |
|---|----------|---------------|--------|-------------|---------|
| 1 | 7.525    | 182099        | 49.994 | 12419       | 57.327  |
| 2 | 10.792   | 182142        | 50.006 | 9245        | 42.673  |

0516 yk-ts-07-537\_002 2026/05/16 14:48:18

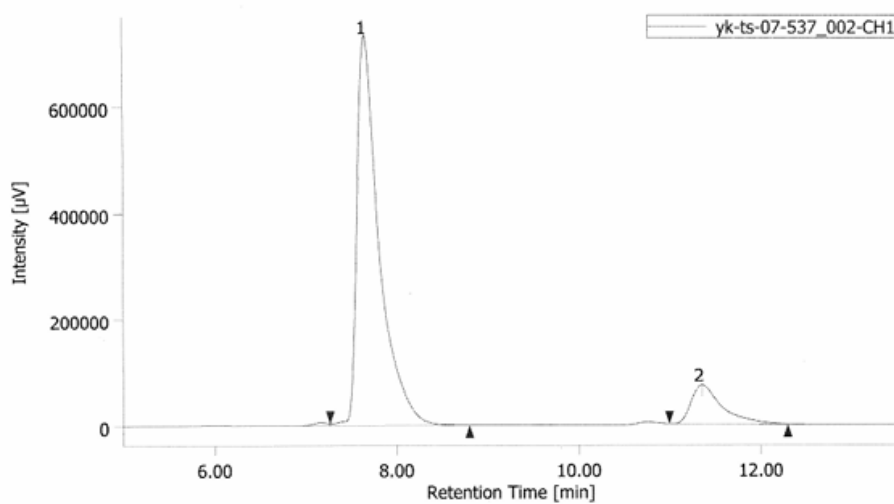

| # | tR [min] | Area [µV·sec] | Area%  | Height [µV] | Height% |
|---|----------|---------------|--------|-------------|---------|
| 1 | 7.658    | 12329185      | 88.012 | 730246      | 90.994  |
| 2 | 11.350   | 1679330       | 11.988 | 72279       | 9.006   |

1

3aa

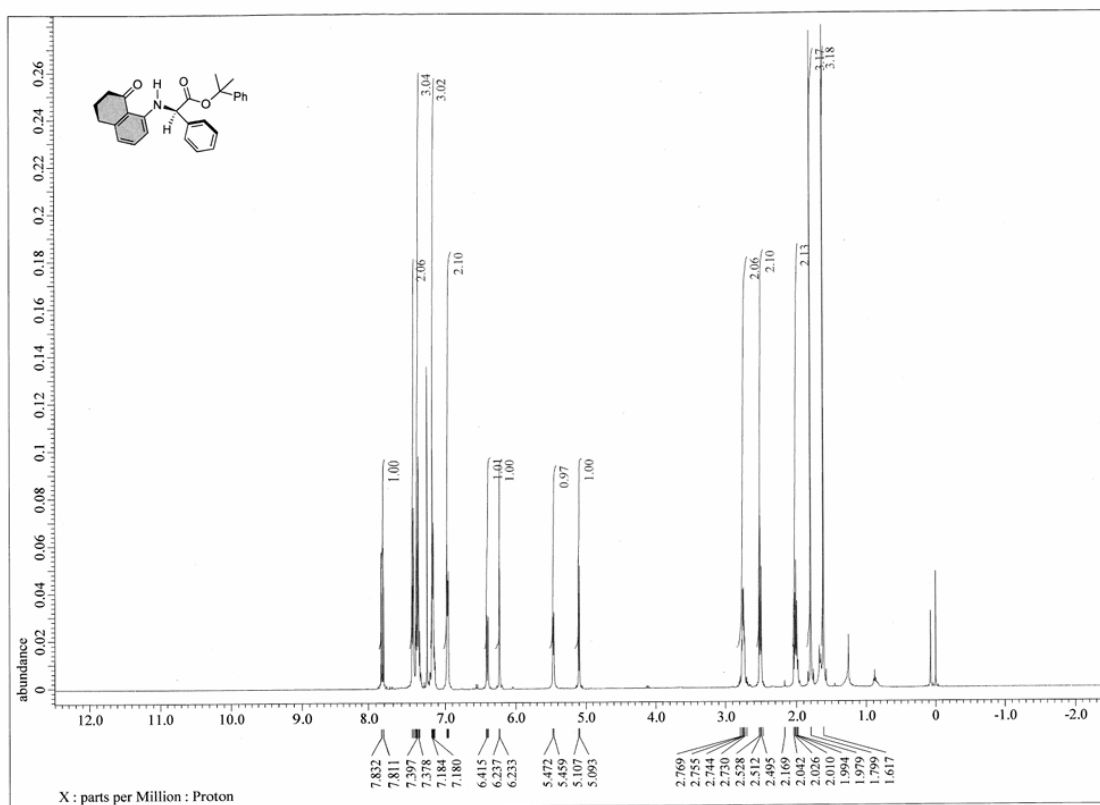

2

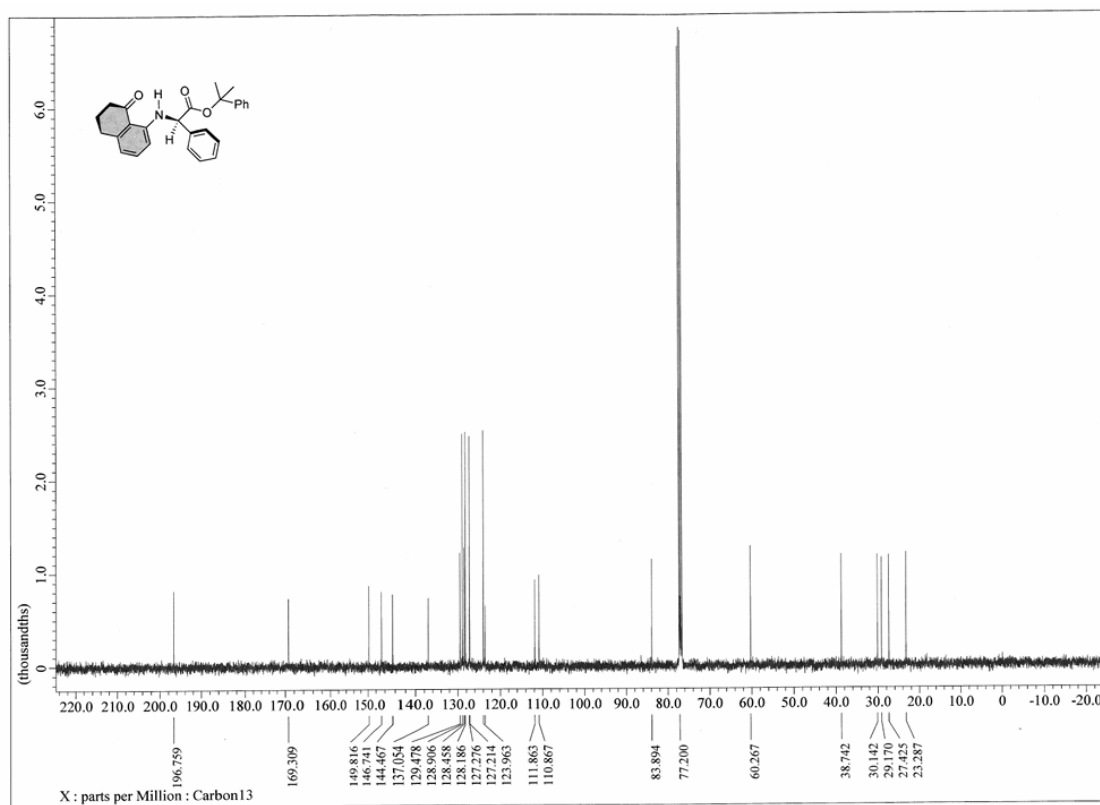

3

0911 yk-ts-04-277\_001 2026/06/16 6:04:57

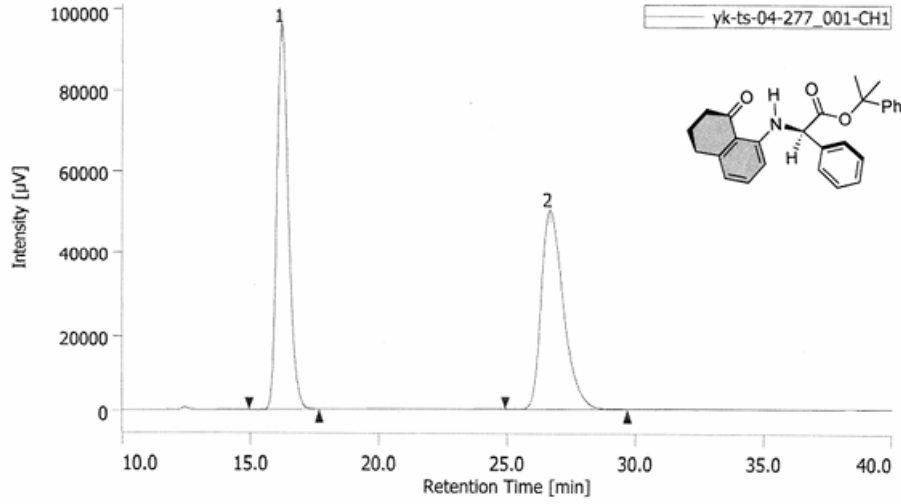

| # | tR [min] | Area [µV·sec] | Area%  | Height [µV] [µV] | Height% |
|---|----------|---------------|--------|------------------|---------|
| 1 | 16.217   | 3059059       | 49.988 | 96005            | 65.591  |
| 2 | 26.692   | 3060530       | 50.012 | 50364            | 34.409  |

0929 yk-ts-04-281\_002 2026/06/16 6:06:21

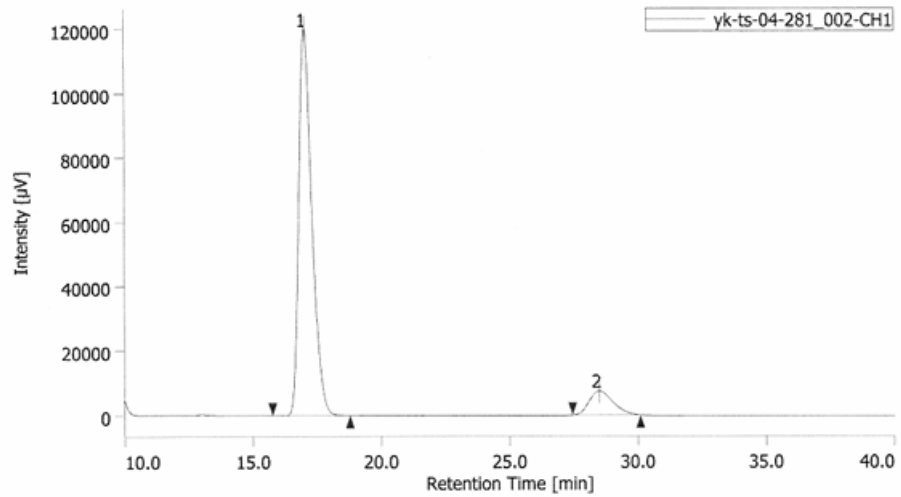

| # | tR [min] | Area [µV·sec] | Area%  | Height [µV] [µV] | Height% |
|---|----------|---------------|--------|------------------|---------|
| 1 | 17.025   | 4234773       | 89.971 | 120237           | 94.277  |
| 2 | 28.483   | 472035        | 10.029 | 7299             | 5.723   |

1

2

1

3ab

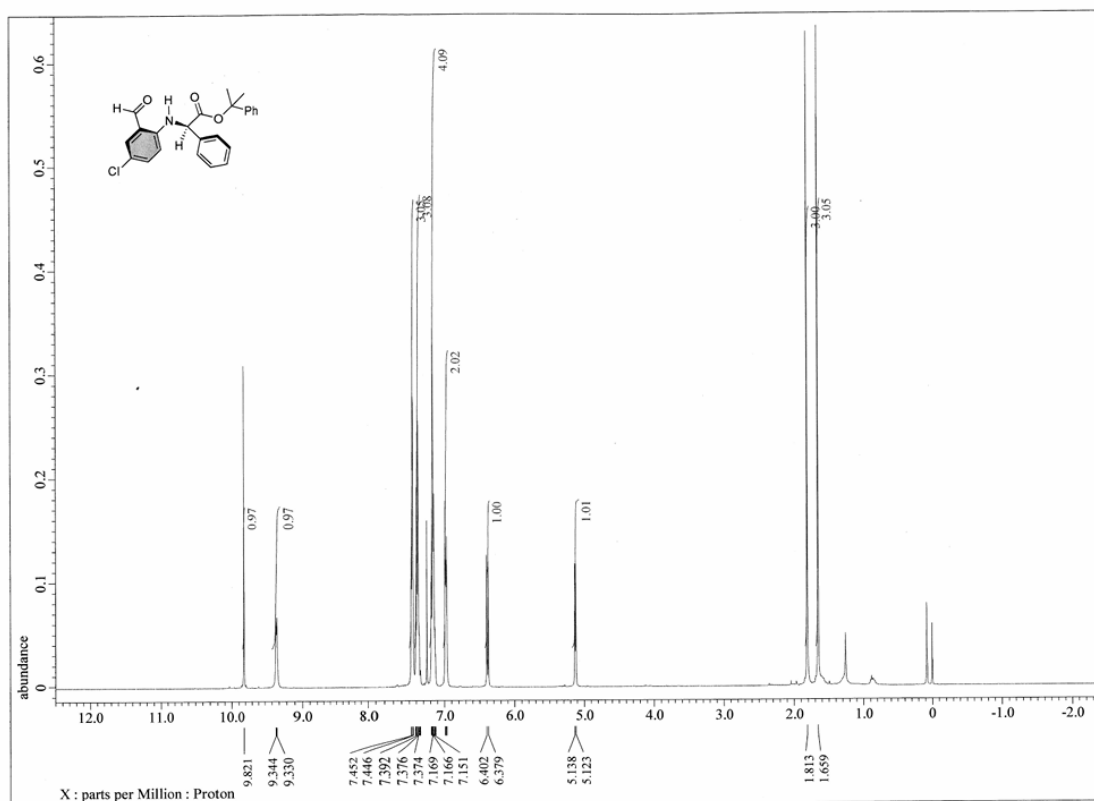

2

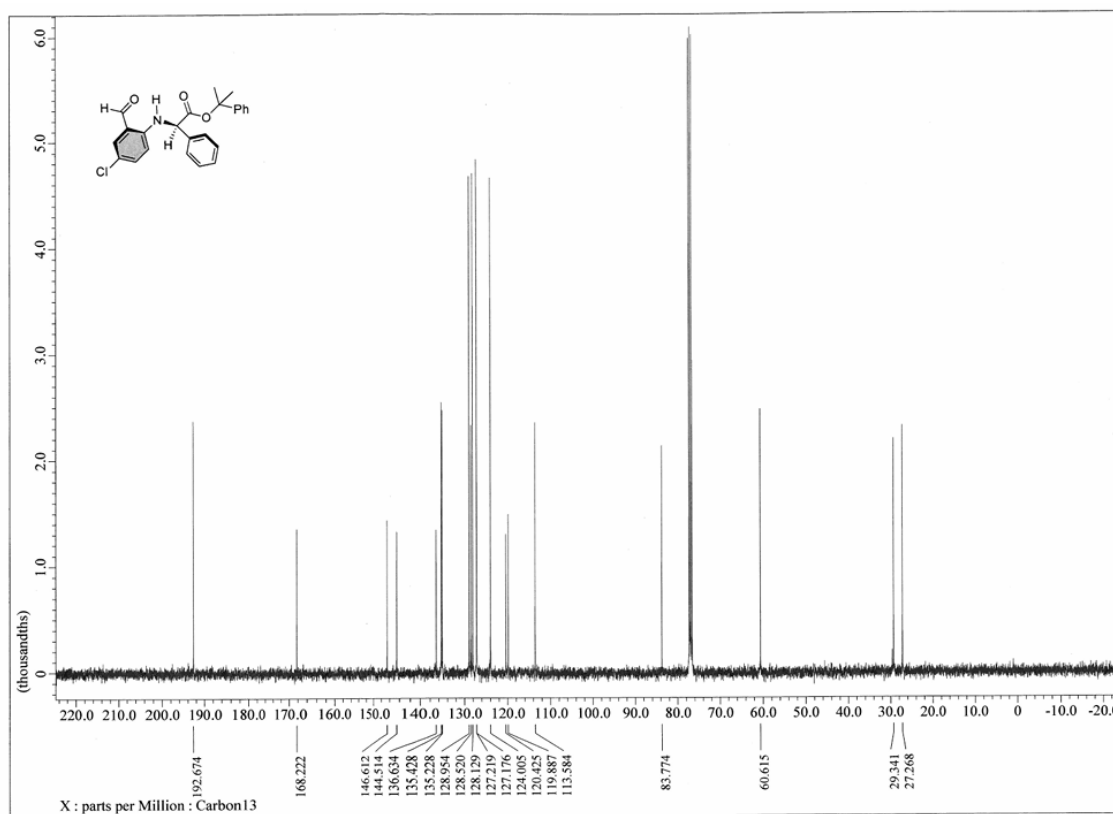

3

1015 yk-ts-05-314\_001 2026/06/16 6:15:59

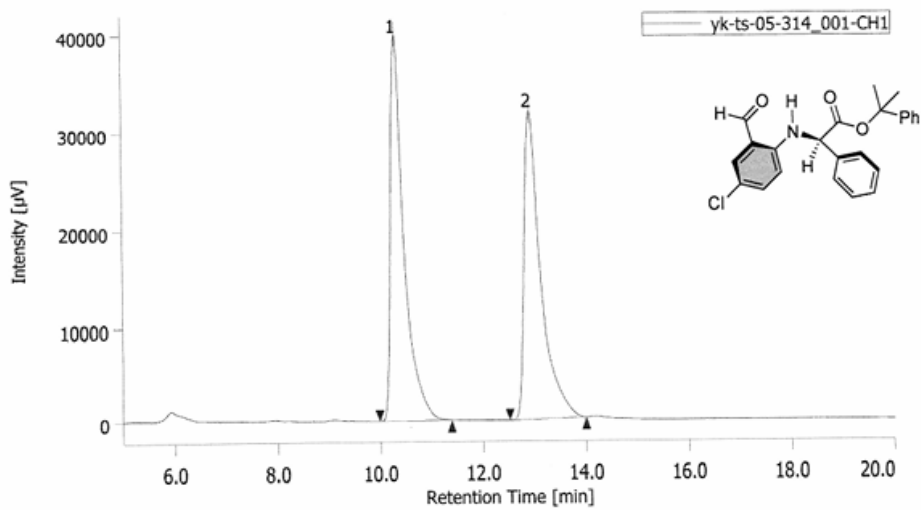

| # | tR [min] | Area [µV·sec] | Area%  | Height (µV) [µV] | Height% |
|---|----------|---------------|--------|------------------|---------|
| 1 | 10.325   | 740271        | 50.408 | 39973            | 55.577  |
| 2 | 12.942   | 728286        | 49.592 | 31950            | 44.423  |

1031 yk-ts-05-318\_001 2026/06/16 6:16:09

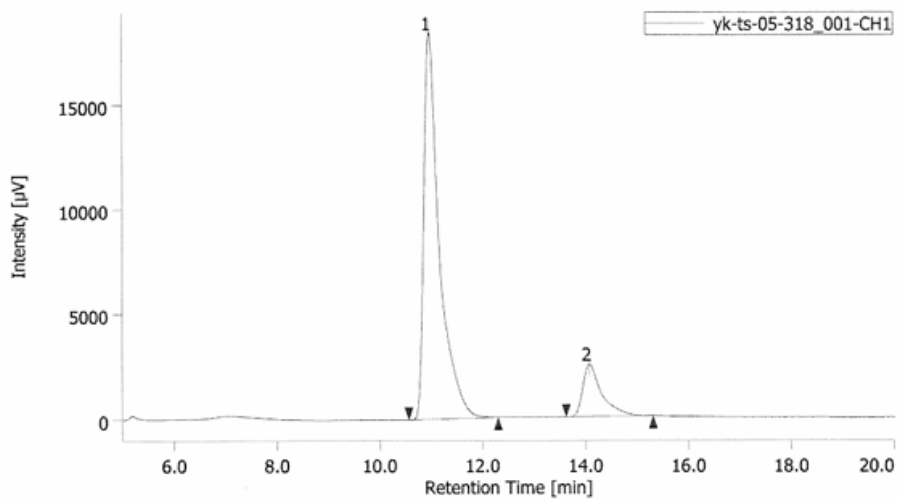

| # | tR [min] | Area [µV·sec] | Area%  | Height (µV) [µV] | Height% |
|---|----------|---------------|--------|------------------|---------|
| 1 | 10.975   | 383395        | 86.035 | 18462            | 68.170  |
| 2 | 14.075   | 62234         | 13.965 | 2477             | 11.830  |

1  
2  
3

1

3ac

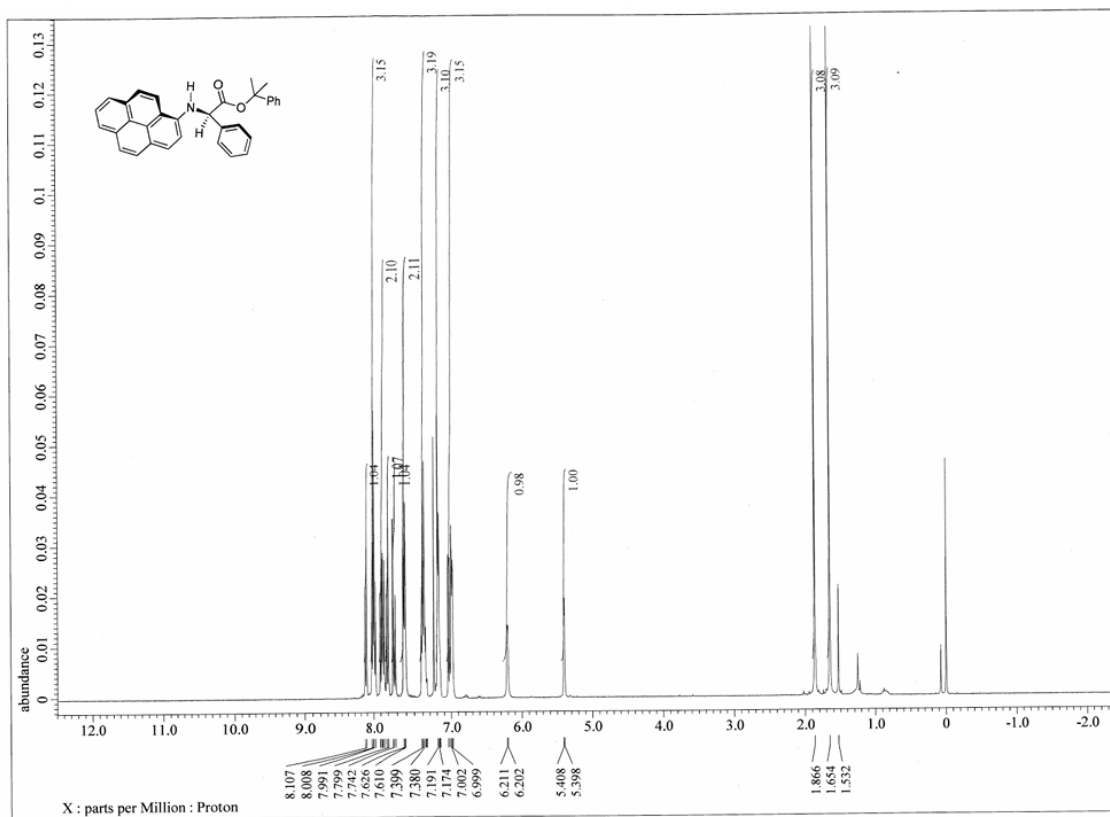

2

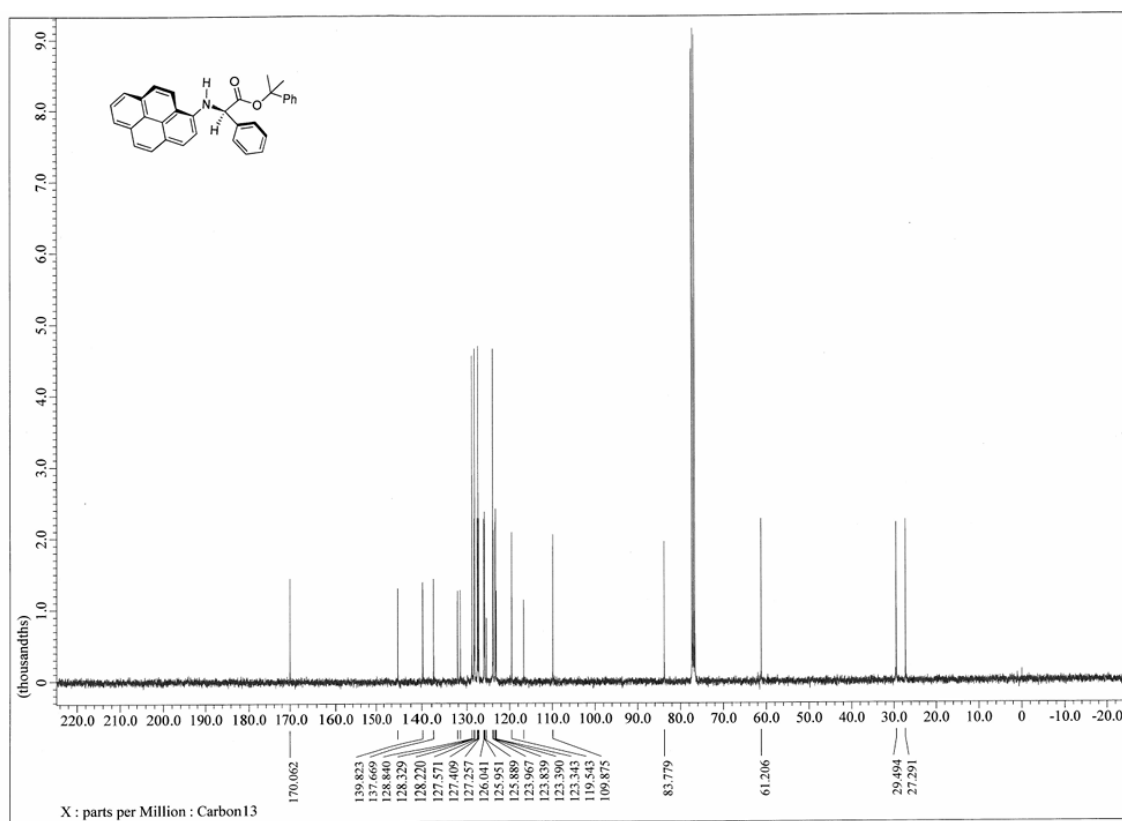

3

1118 yk-ts-05-360\_001 2026/06/16 6:27:28

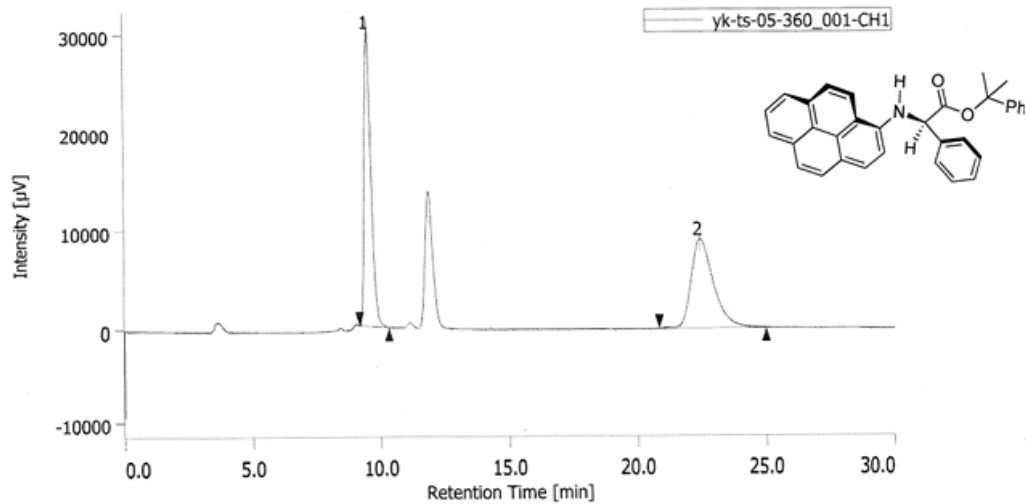

| # | tR [min] | Area [µV·sec] | Area%  | Height [µV] [µV] | Height% |
|---|----------|---------------|--------|------------------|---------|
| 1 | 9.517    | 546020        | 50.953 | 30156            | 76.866  |
| 2 | 22.458   | 525603        | 49.047 | 9076             | 23.134  |

1219 yk-ts-06-406\_001 2026/06/16 6:27:09

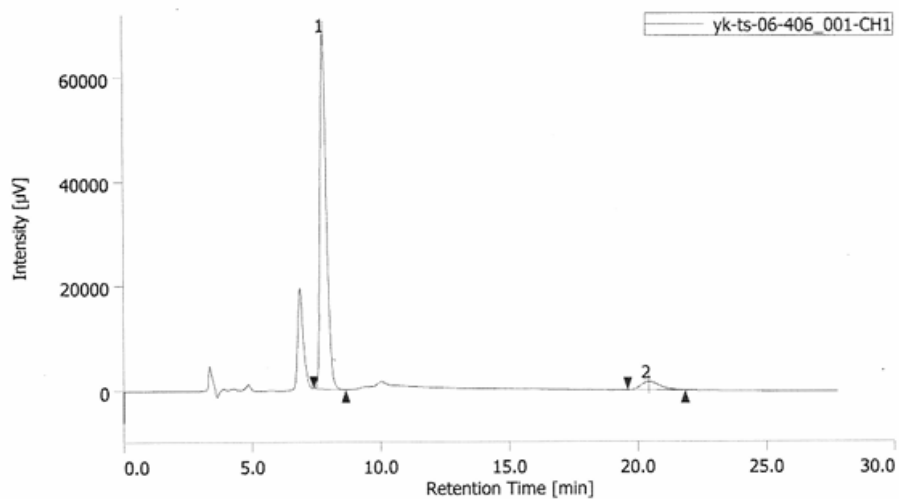

| # | tR [min] | Area [µV·sec] | Area%  | Height [µV] [µV] | Height% |
|---|----------|---------------|--------|------------------|---------|
| 1 | 7.783    | 1161198       | 93.588 | 67993            | 97.750  |
| 2 | 20.425   | 79558         | 6.412  | 1565             | 2.250   |

1

3ad

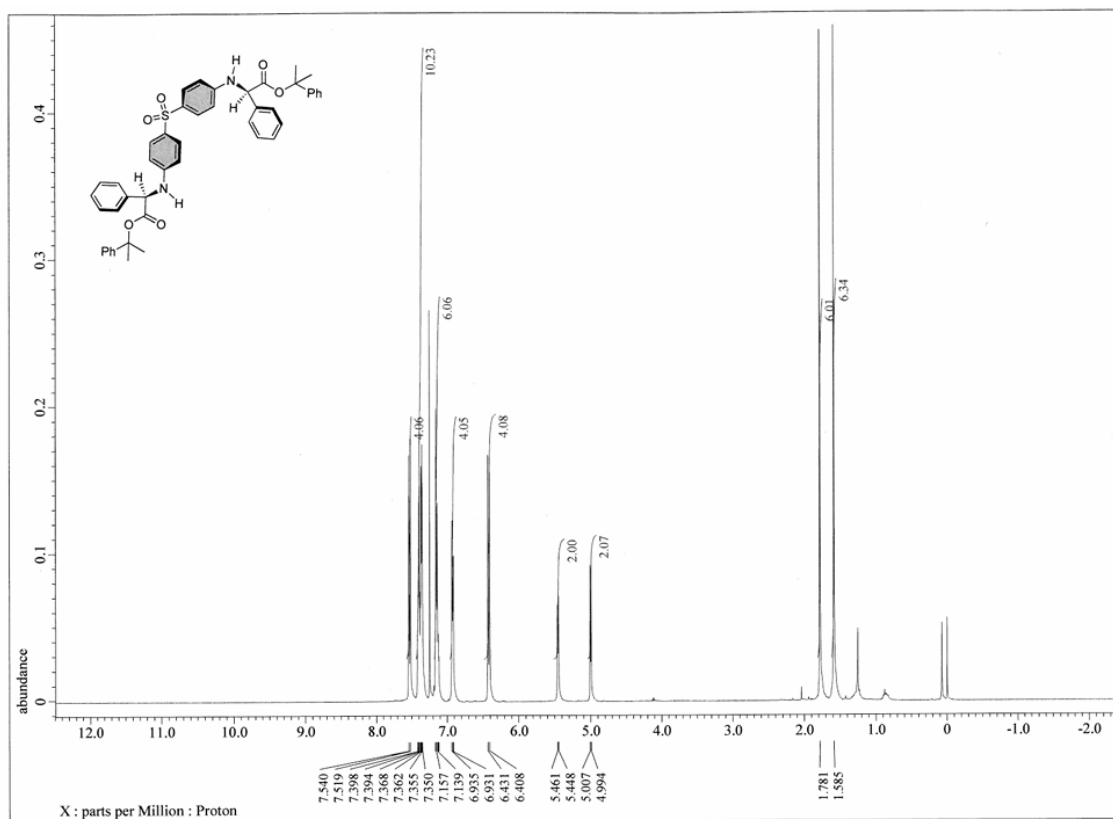

2

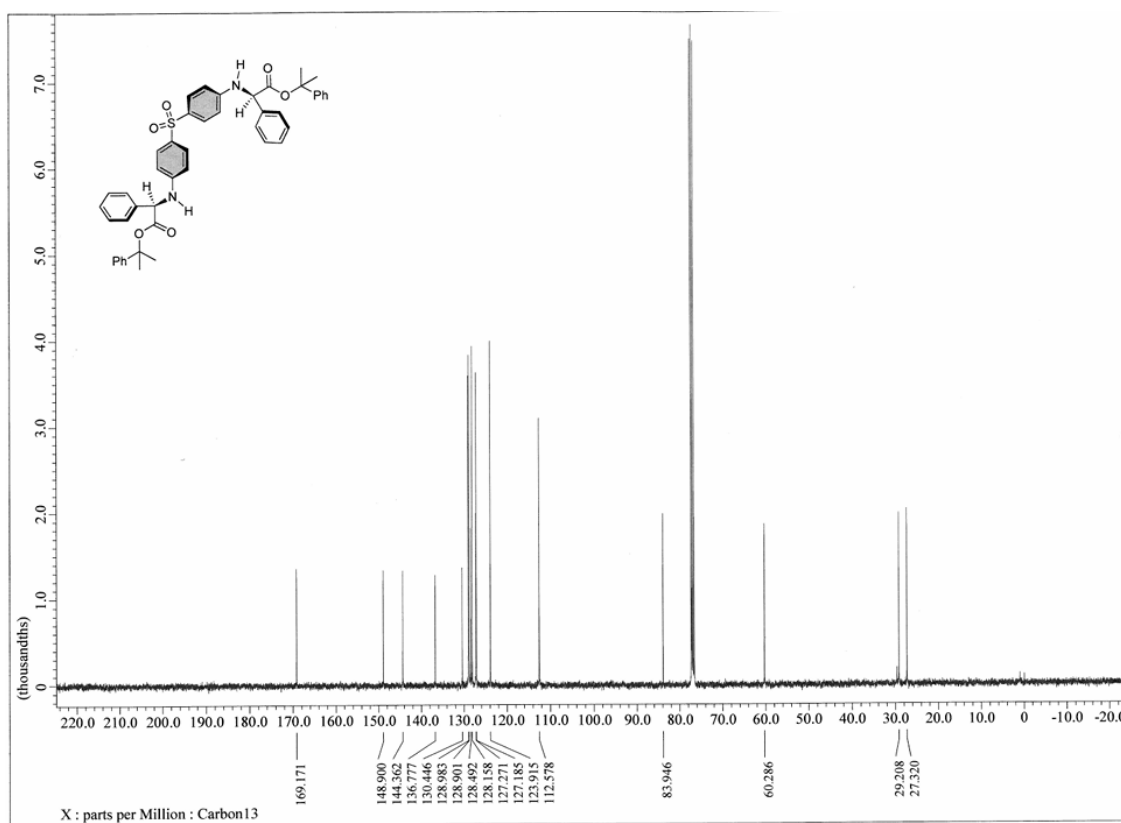

3

0206 yk-ts-06-446\_002 2026/05/26 17:31:37

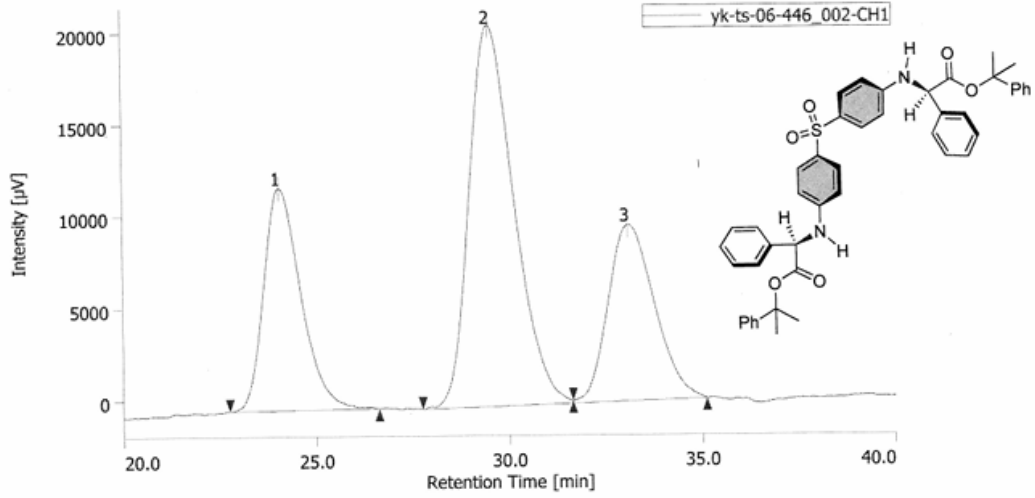

| # | tR [min] | Area [µV·sec] | Area%  | Height [µV] [µV] | Height% |
|---|----------|---------------|--------|------------------|---------|
| 1 | 24.058   | 807544        | 24.674 | 12061            | 28.494  |
| 2 | 29.525   | 1668981       | 50.995 | 20741            | 49.000  |
| 3 | 33.092   | 796328        | 24.331 | 9527             | 22.507  |

0206 yk-ts-06-447\_003 2026/05/26 17:31:48

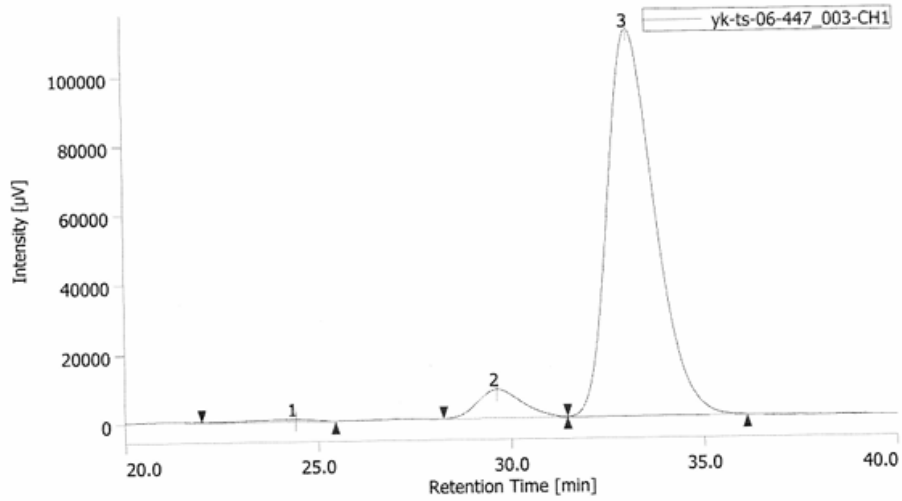

| # | tR [min] | Area [µV·sec] | Area%  | Height [µV] [µV] | Height% |
|---|----------|---------------|--------|------------------|---------|
| 1 | 24.400   | 72874         | 0.715  | 732              | 0.607   |
| 2 | 29.633   | 667413        | 6.550  | 8285             | 6.864   |
| 3 | 33.092   | 9449768       | 92.735 | 111679           | 92.529  |

1

2

1

3ae

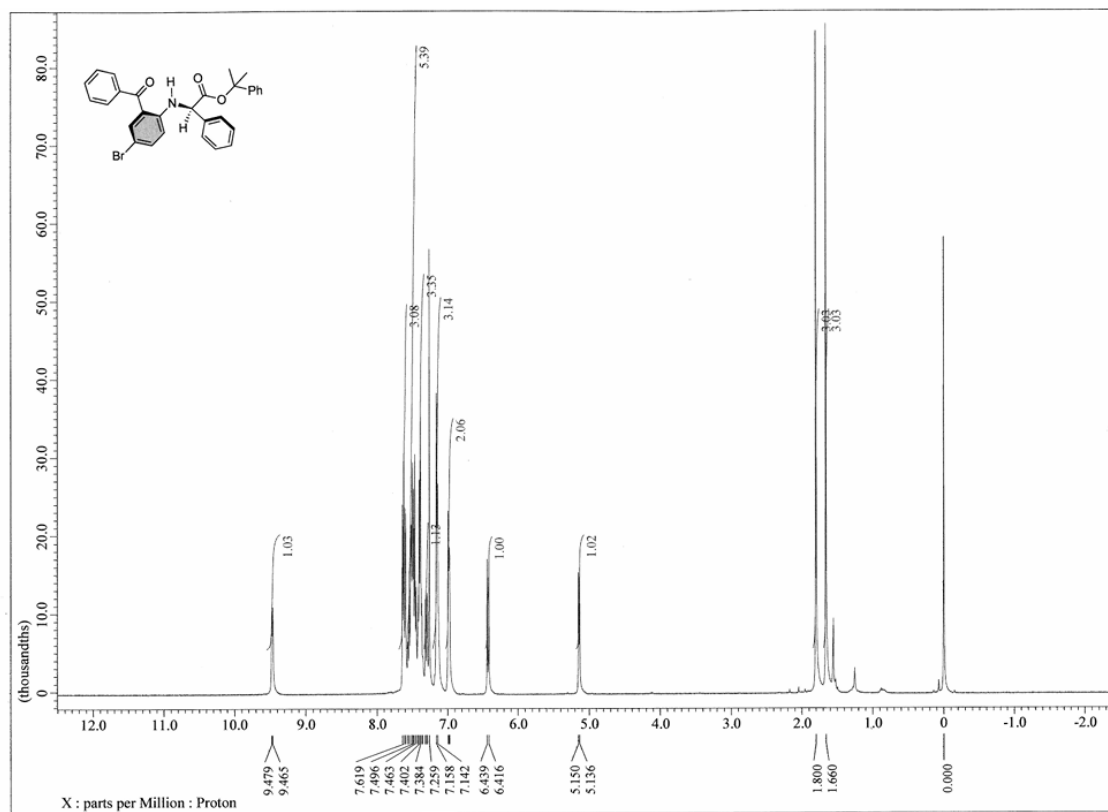

2

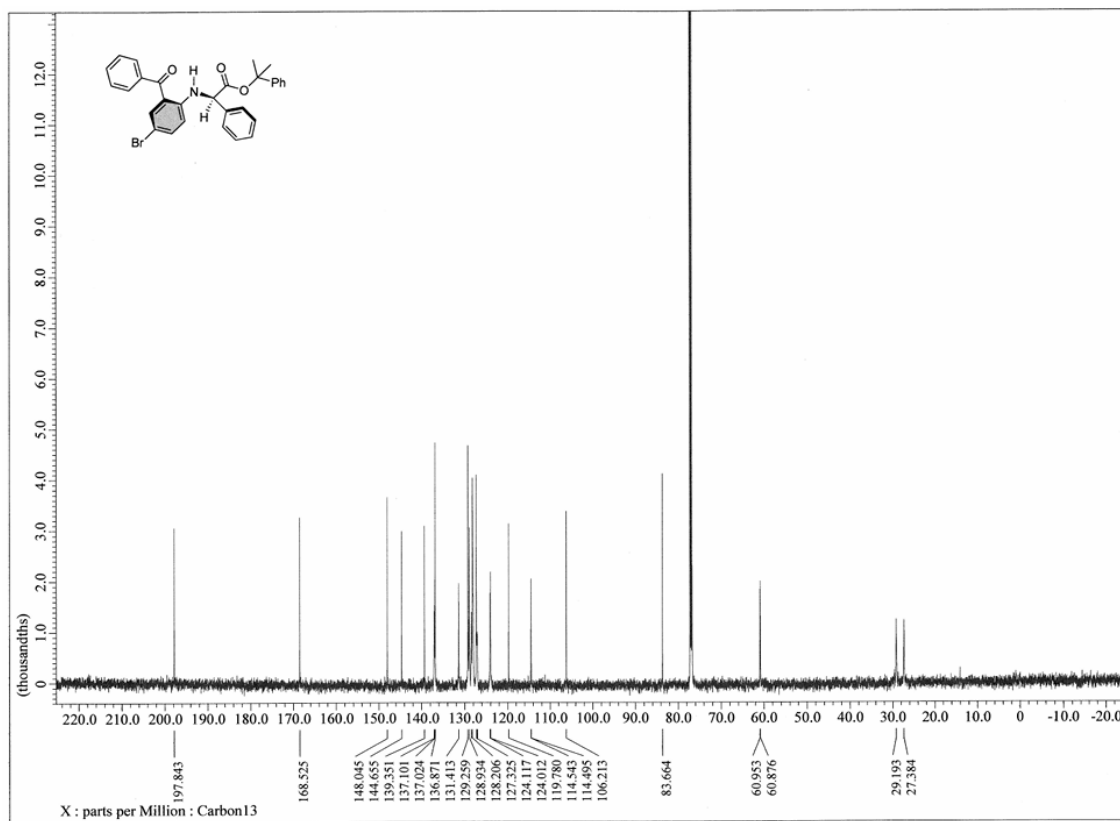

3

0616 5ae racemic\_002 2026/06/16 6:55:34

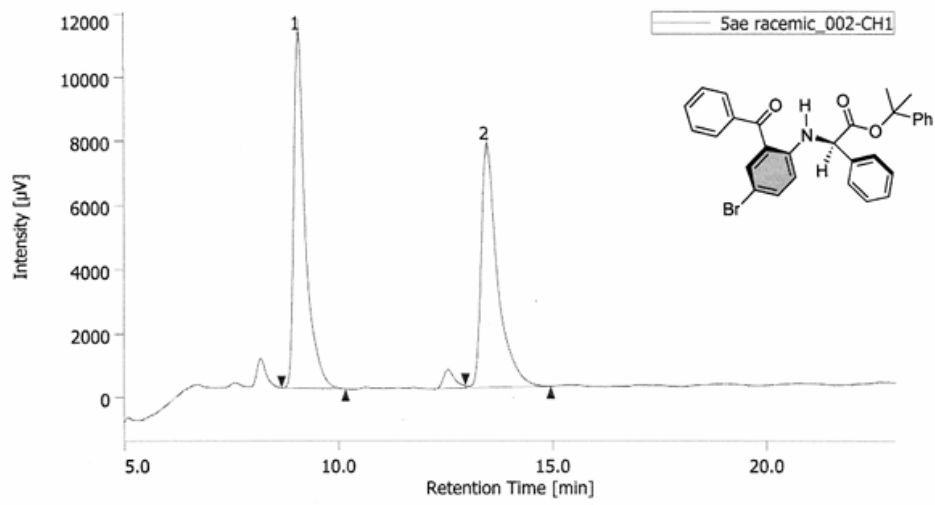

| # | tR [min] | Area [µV·sec] | Area%  | Height [µV] [µV] | Height% |
|---|----------|---------------|--------|------------------|---------|
| 1 | 9.075    | 208178        | 50.610 | 11171            | 59.435  |
| 2 | 13.483   | 203162        | 49.390 | 7624             | 40.565  |

0616 3ae chiral\_003 2026/06/16 4:47:43

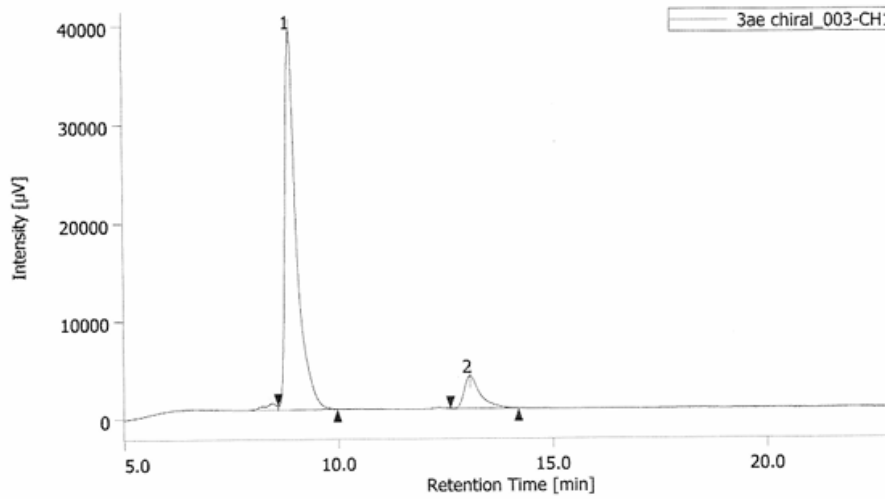

| # | tR [min] | Area [µV·sec] | Area%  | Height [µV] [µV] | Height% |
|---|----------|---------------|--------|------------------|---------|
| 1 | 8.883    | 714660        | 89.404 | 38635            | 92.100  |
| 2 | 13.067   | 84697         | 10.596 | 3314             | 7.900   |

1  
2  
3

1

3af

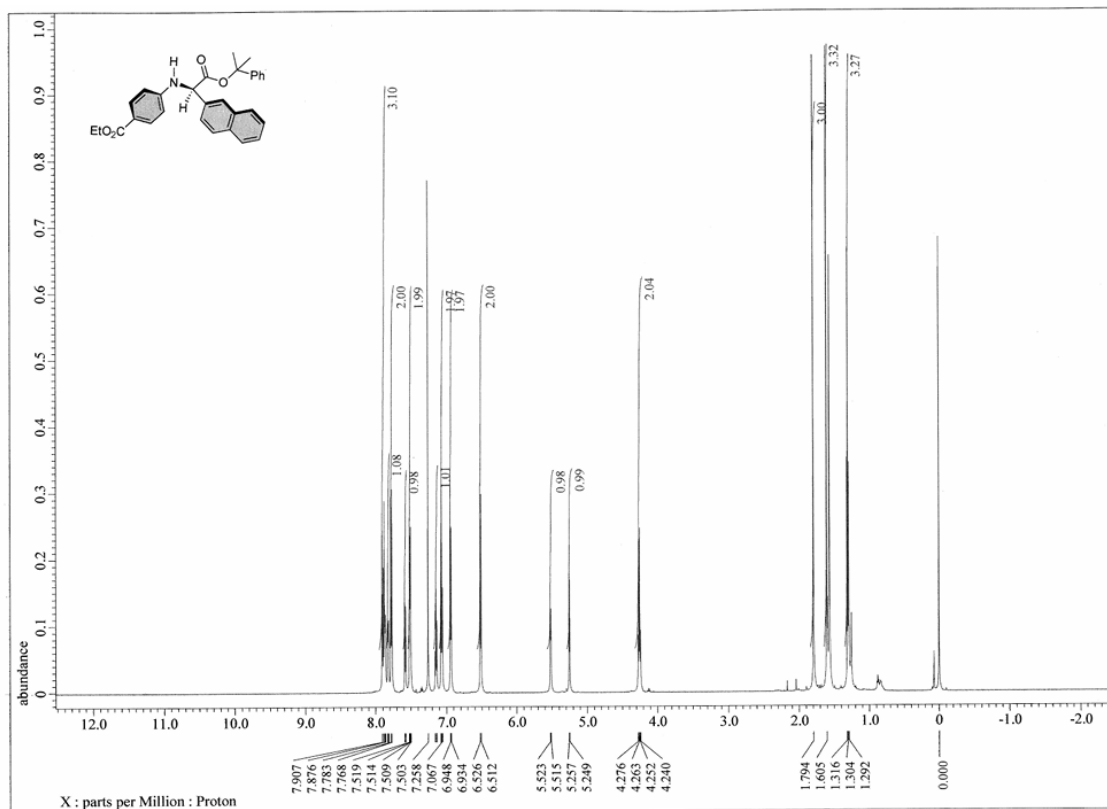

2

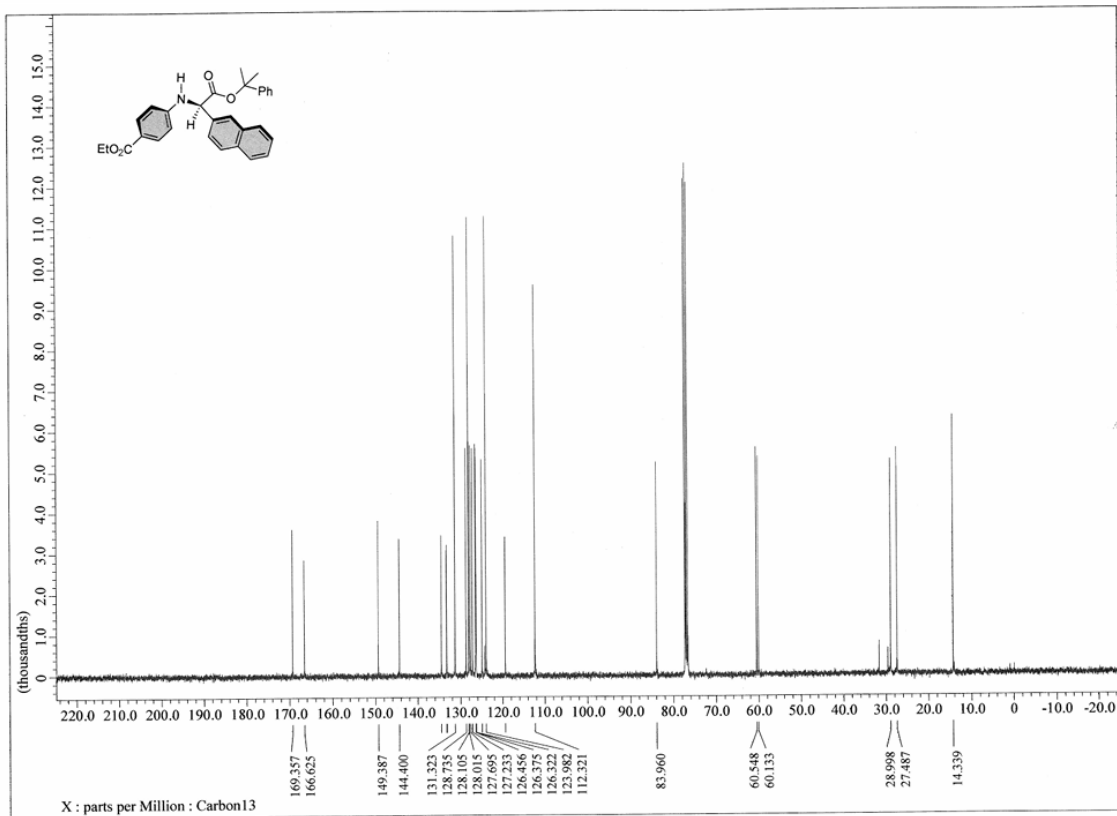

3

4

1219 yk-ts-06-411\_003 2026/06/03 19:03:13

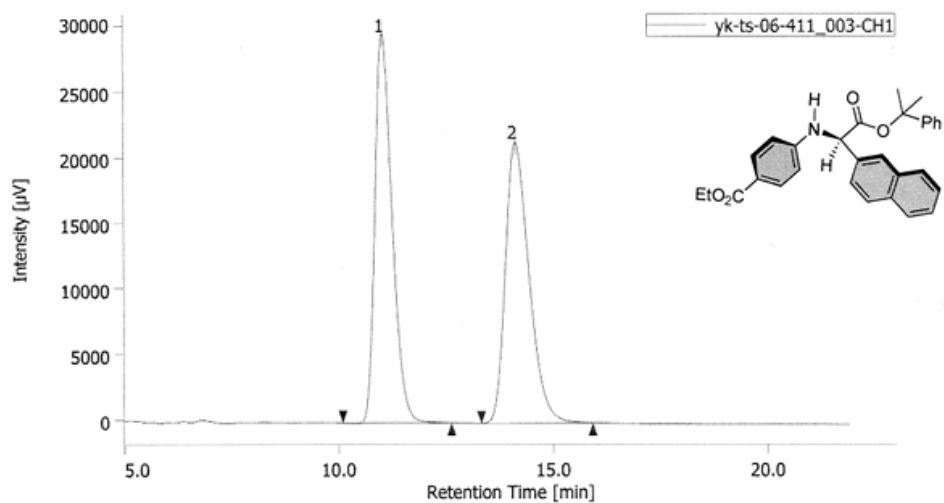

| # | tR [min] | Area [µV·sec] | Area%  | Height [µV] [µV] | Height% |
|---|----------|---------------|--------|------------------|---------|
| 1 | 11.042   | 825909        | 50.085 | 29620            | 58.052  |
| 2 | 14.133   | 823091        | 49.915 | 21404            | 41.948  |

0603 yk-ts-08-556\_001 2026/06/16 7:16:43

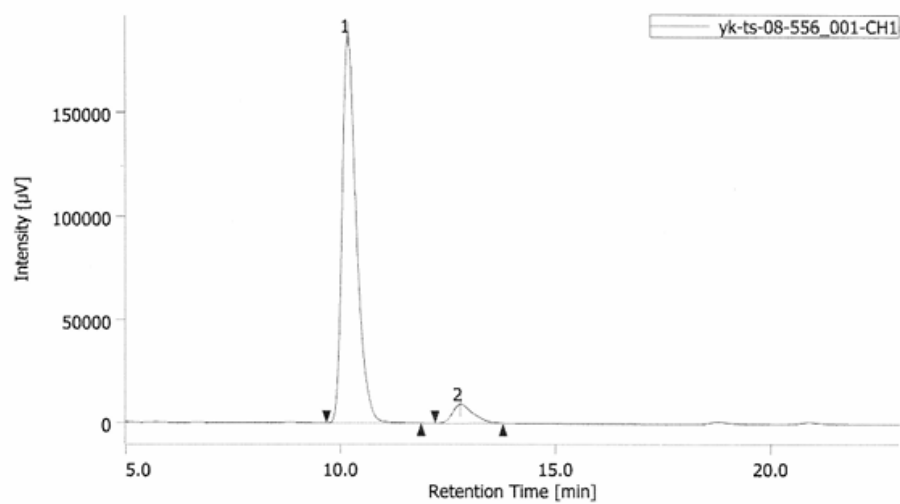

| # | tR [min] | Area [µV·sec] | Area%  | Height [µV] [µV] | Height% |
|---|----------|---------------|--------|------------------|---------|
| 1 | 10.183   | 4330639       | 93.500 | 188438           | 95.400  |
| 2 | 12.792   | 301046        | 6.500  | 9085             | 4.600   |

1  
2  
3

1

3ag

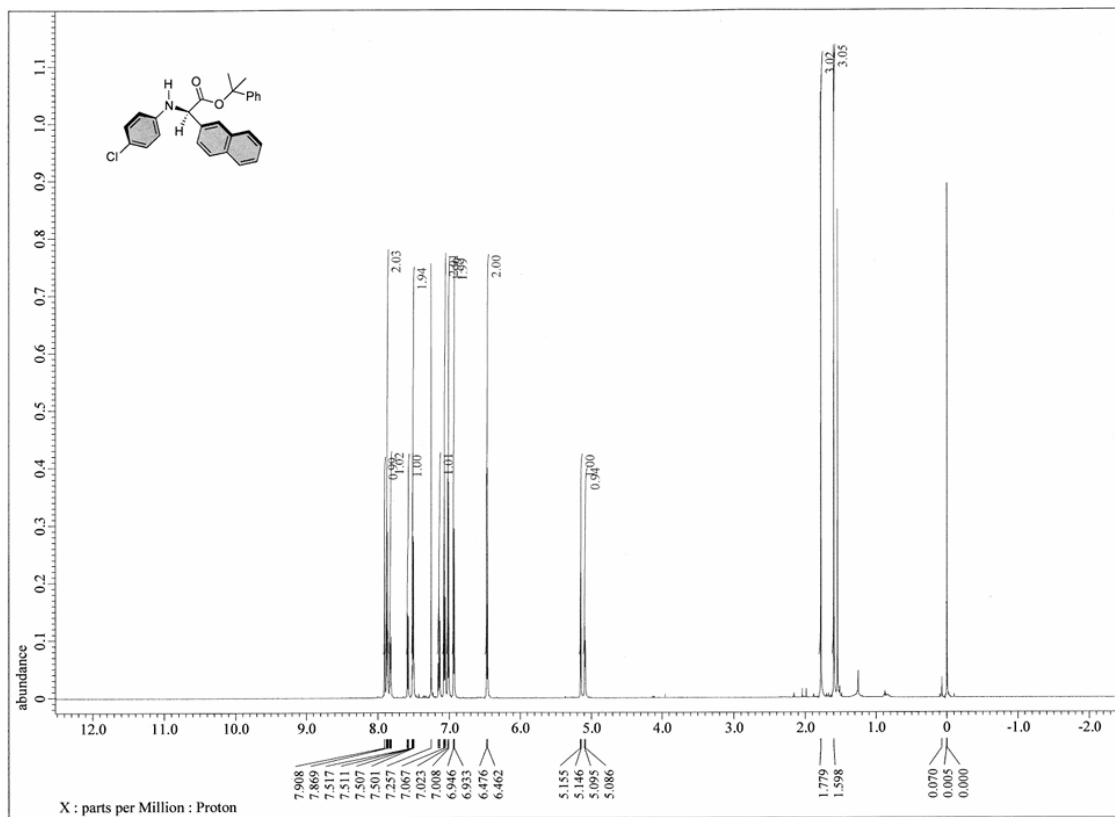

2

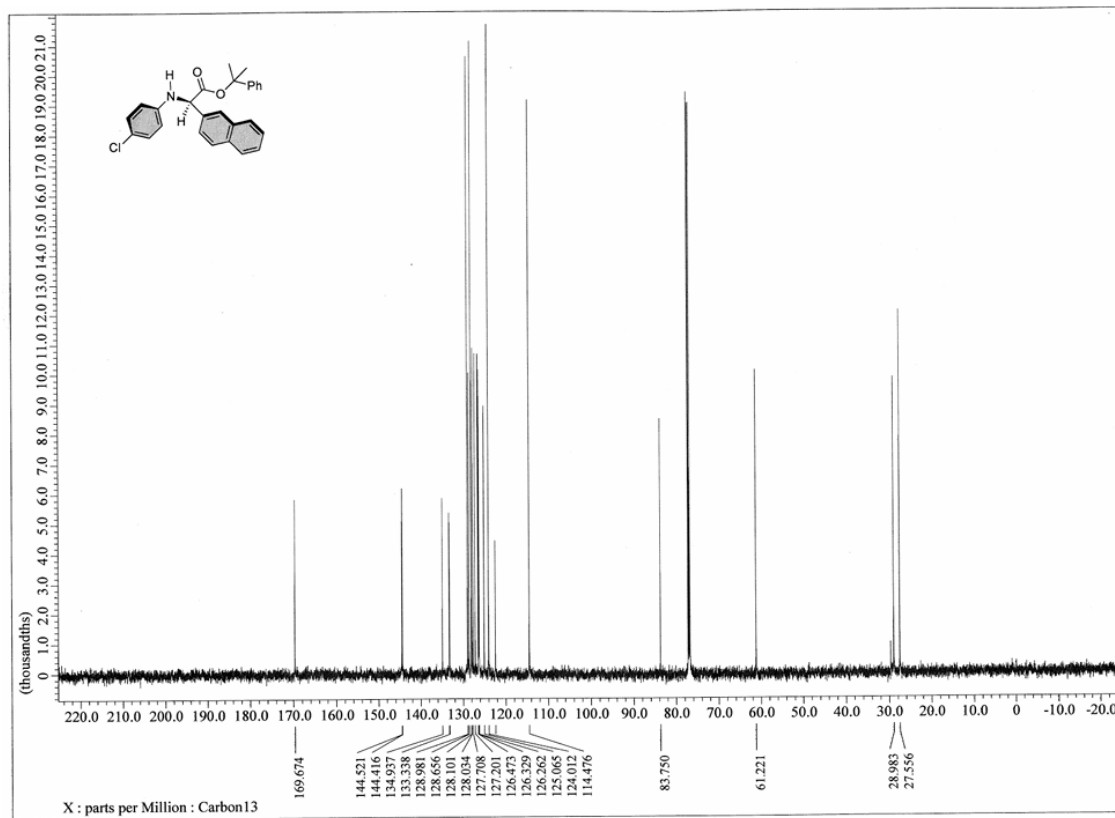

3

1218 ykts-060401\_001 2026/06/03 19:11:21

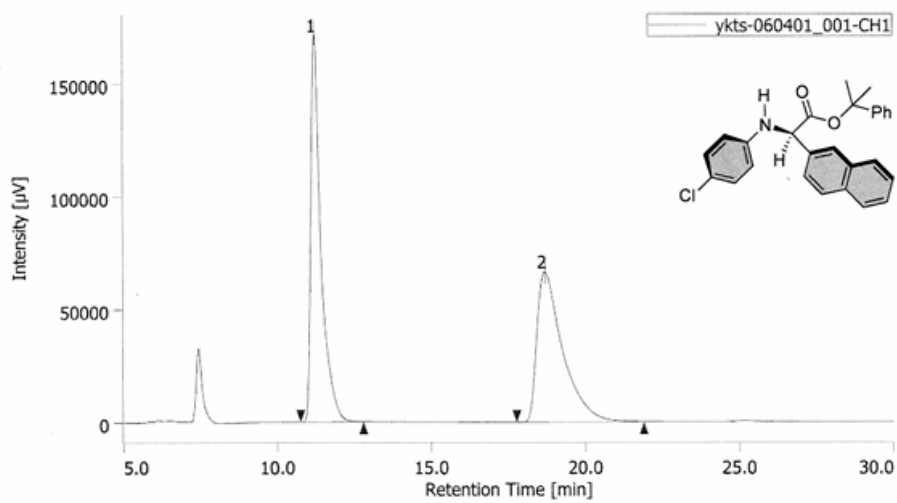

| # | tR [min] | Area [µV·sec] | Area%  | Height [µV] [µV] | Height% |
|---|----------|---------------|--------|------------------|---------|
| 1 | 11.233   | 3887927       | 50.217 | 172252           | 72.224  |
| 2 | 18.692   | 3854292       | 49.783 | 66245            | 27.776  |

0603 yk-ts-08-557\_002 2026/06/04 1:45:08

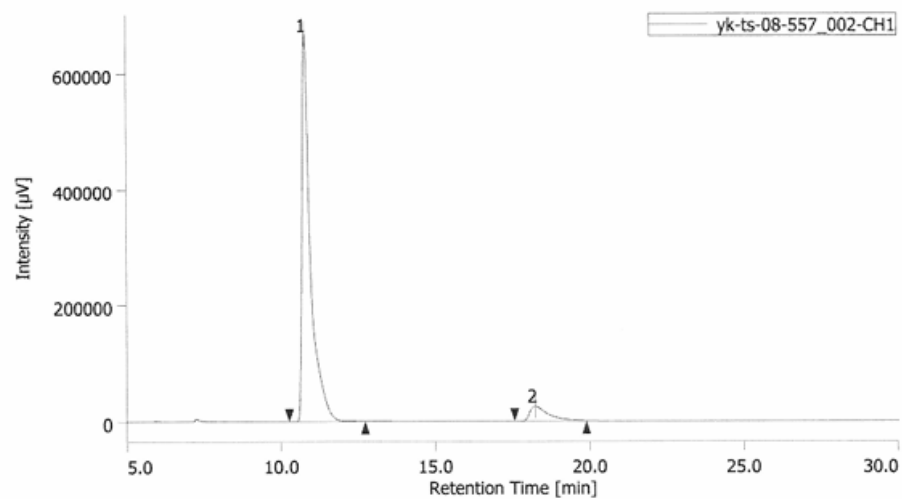

| # | tR [min] | Area [µV·sec] | Area%  | Height [µV] [µV] | Height% |
|---|----------|---------------|--------|------------------|---------|
| 1 | 10.783   | 12829912      | 92.693 | 669146           | 96.422  |
| 2 | 18.233   | 1011449       | 7.307  | 24828            | 3.578   |

- 1
- 2
- 3

1

3ah

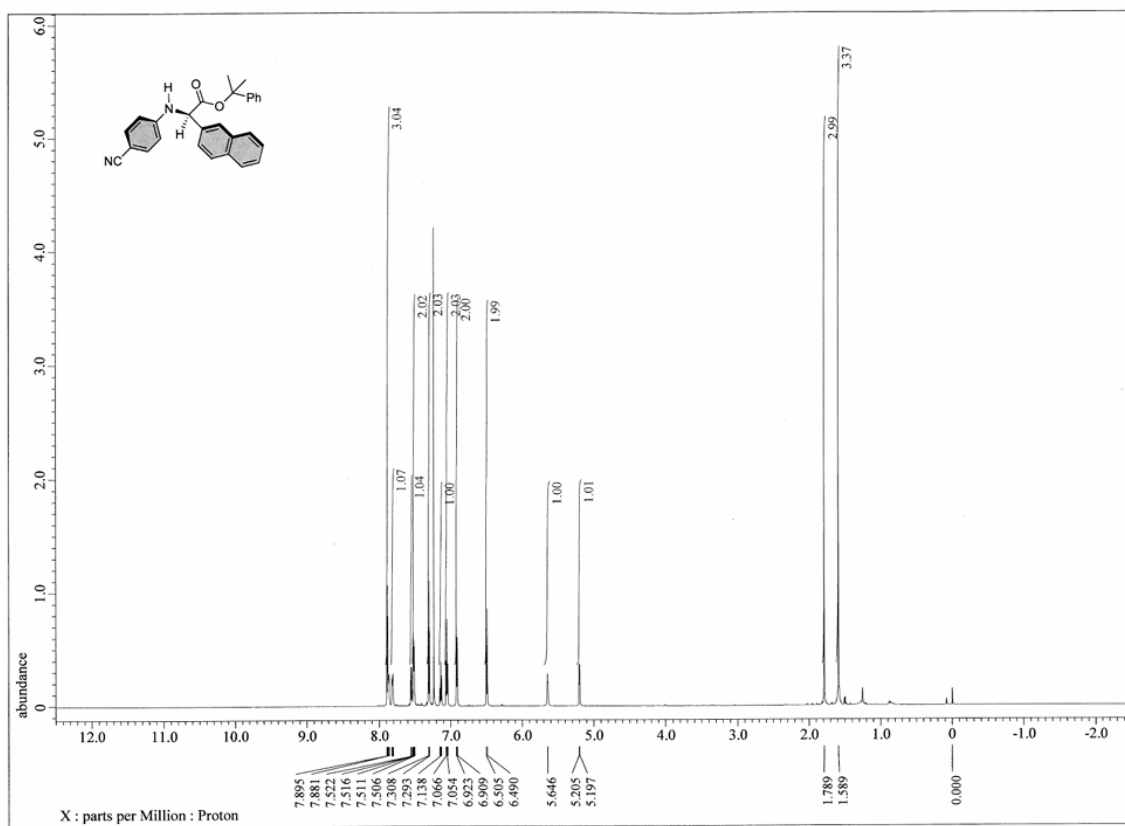

2

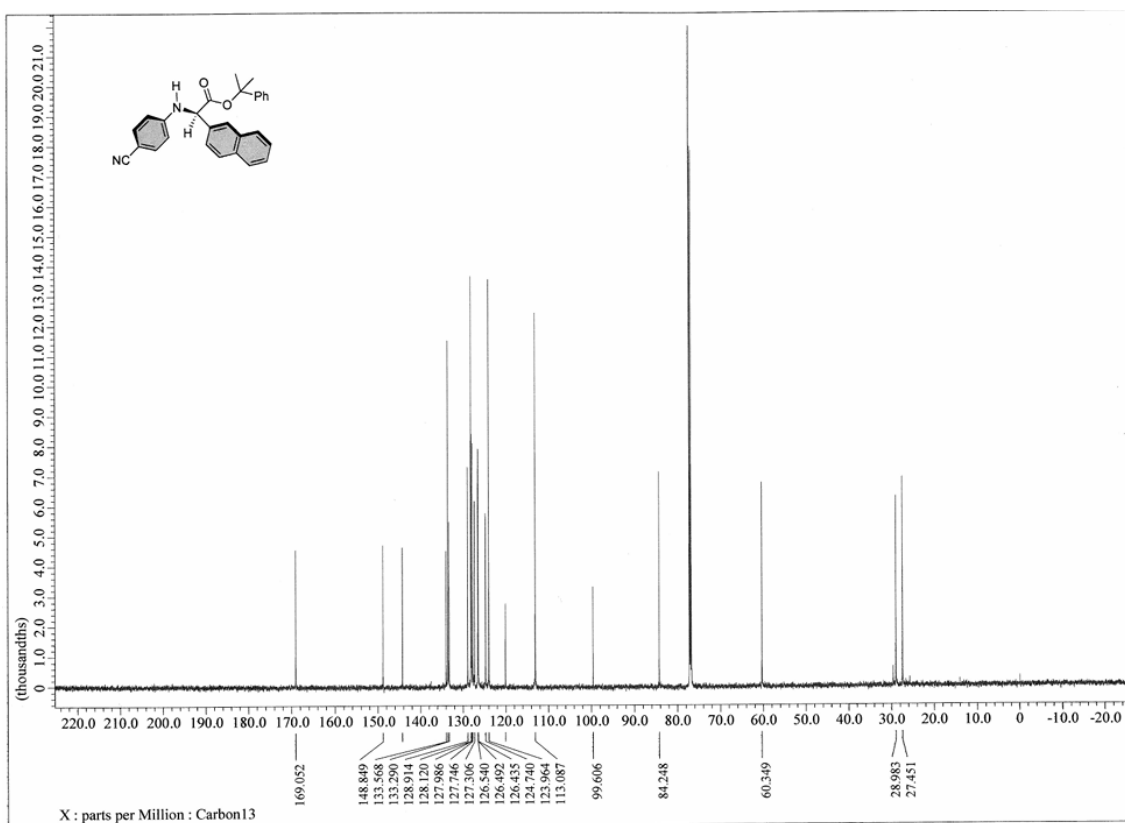

3

0115 yk-ts-06-421\_001 2026/06/08 12:36:01

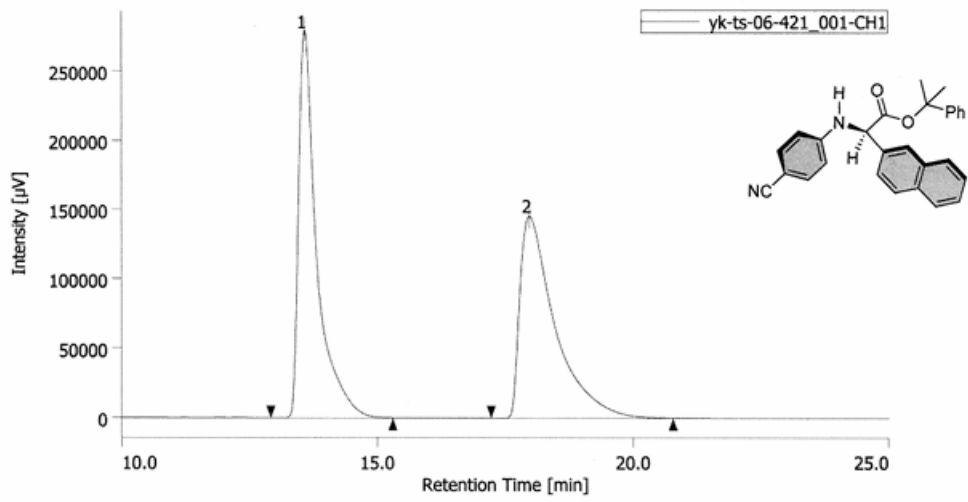

| # | tR [min] | Area [µV·sec] | Area%  | Height [µV] [µV] | Height% |
|---|----------|---------------|--------|------------------|---------|
| 1 | 13.583   | 6893121       | 49.992 | 279655           | 65.850  |
| 2 | 17.983   | 6895237       | 50.008 | 145032           | 34.150  |

0607 yk-ts-08-566\_001 2026/06/08 12:36:08

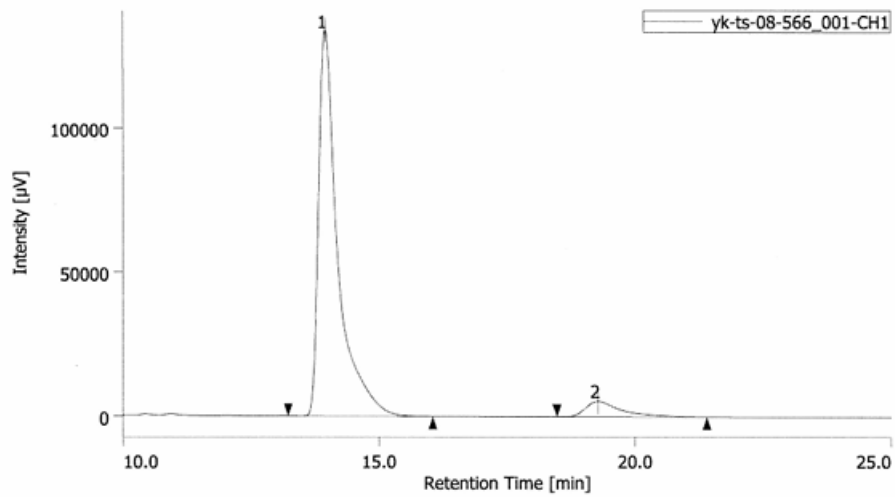

| # | tR [min] | Area [µV·sec] | Area%  | Height [µV] [µV] | Height% |
|---|----------|---------------|--------|------------------|---------|
| 1 | 13.950   | 3506807       | 93.075 | 134397           | 96.211  |
| 2 | 19.267   | 260906        | 6.925  | 5293             | 3.789   |

1  
2  
3

1

7

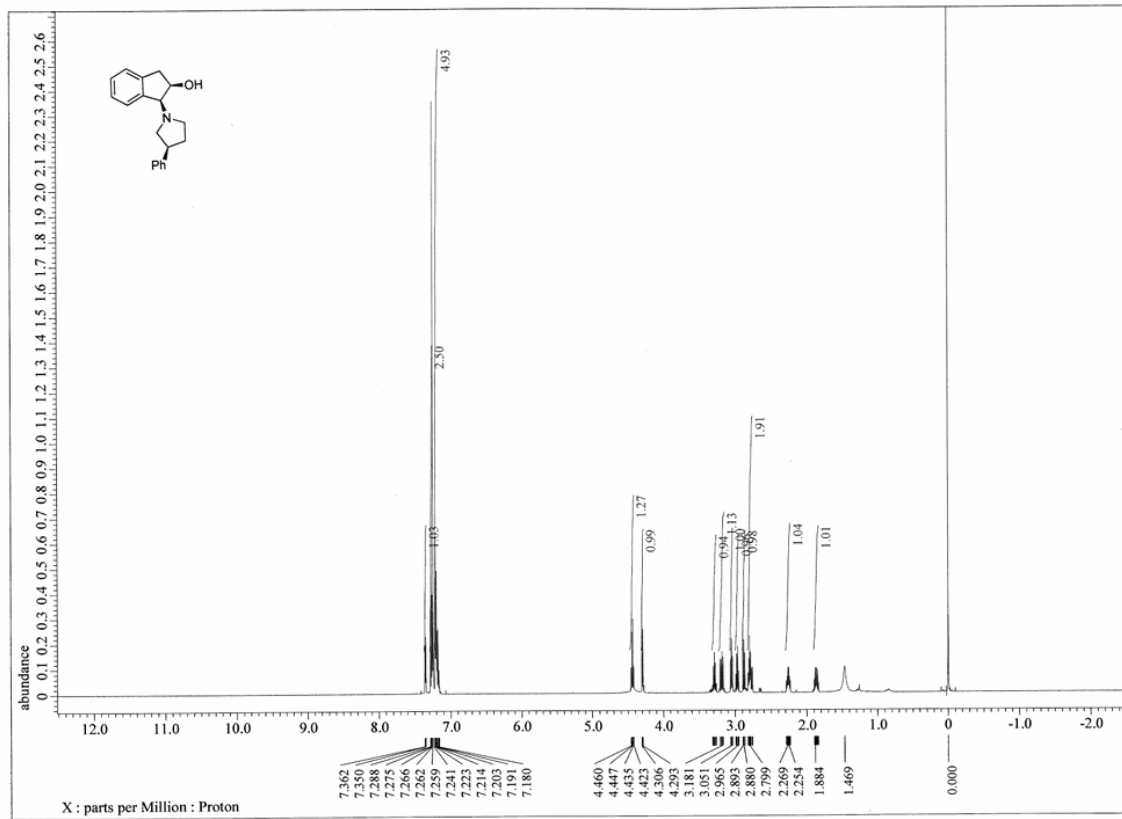

2

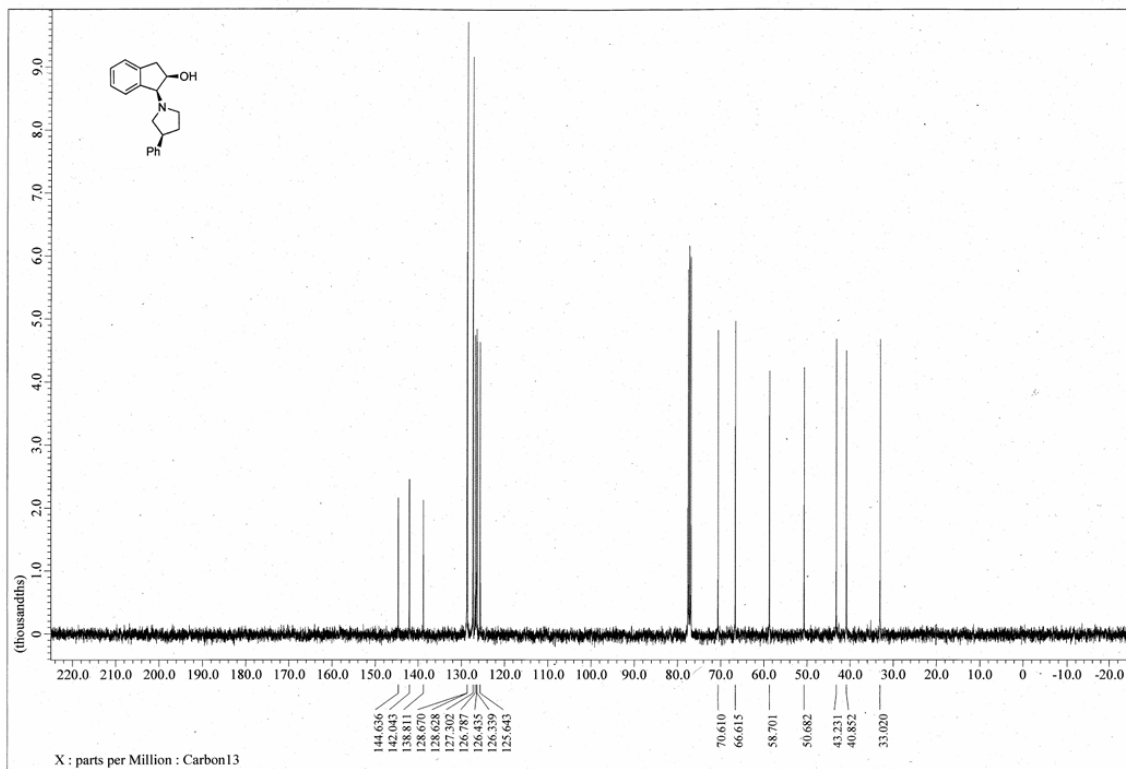

3

4

1

9a

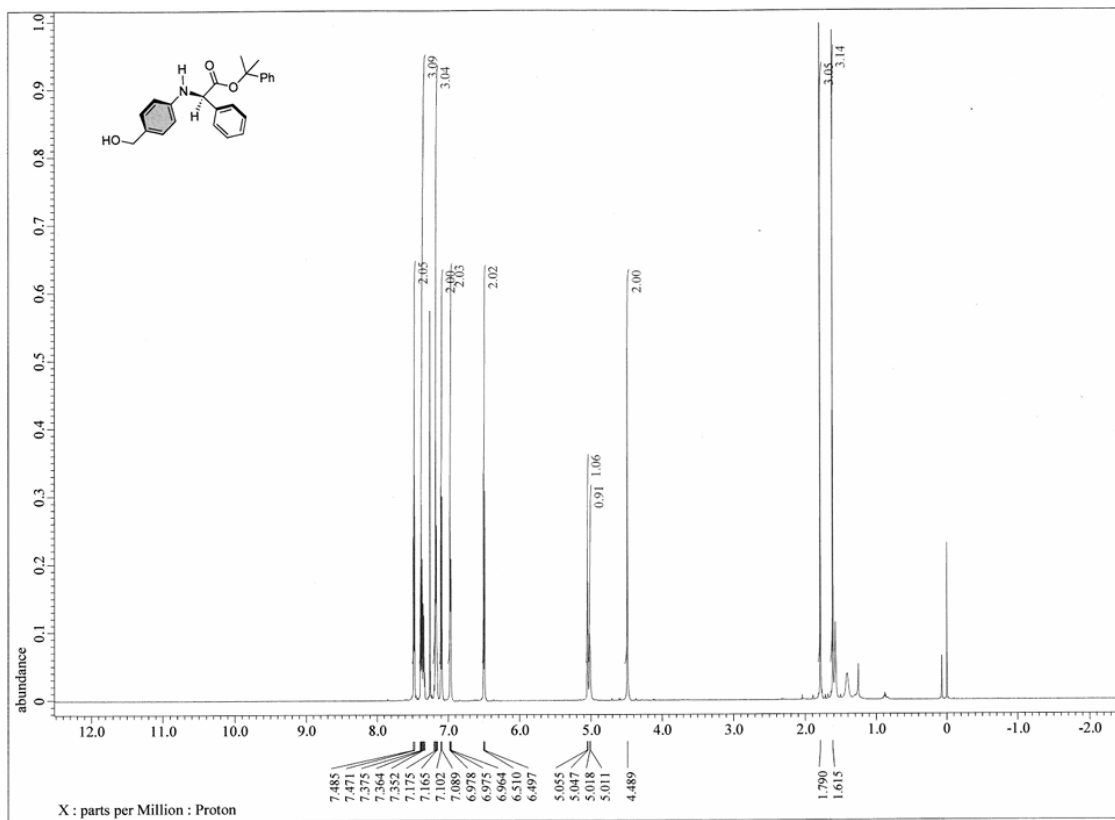

2

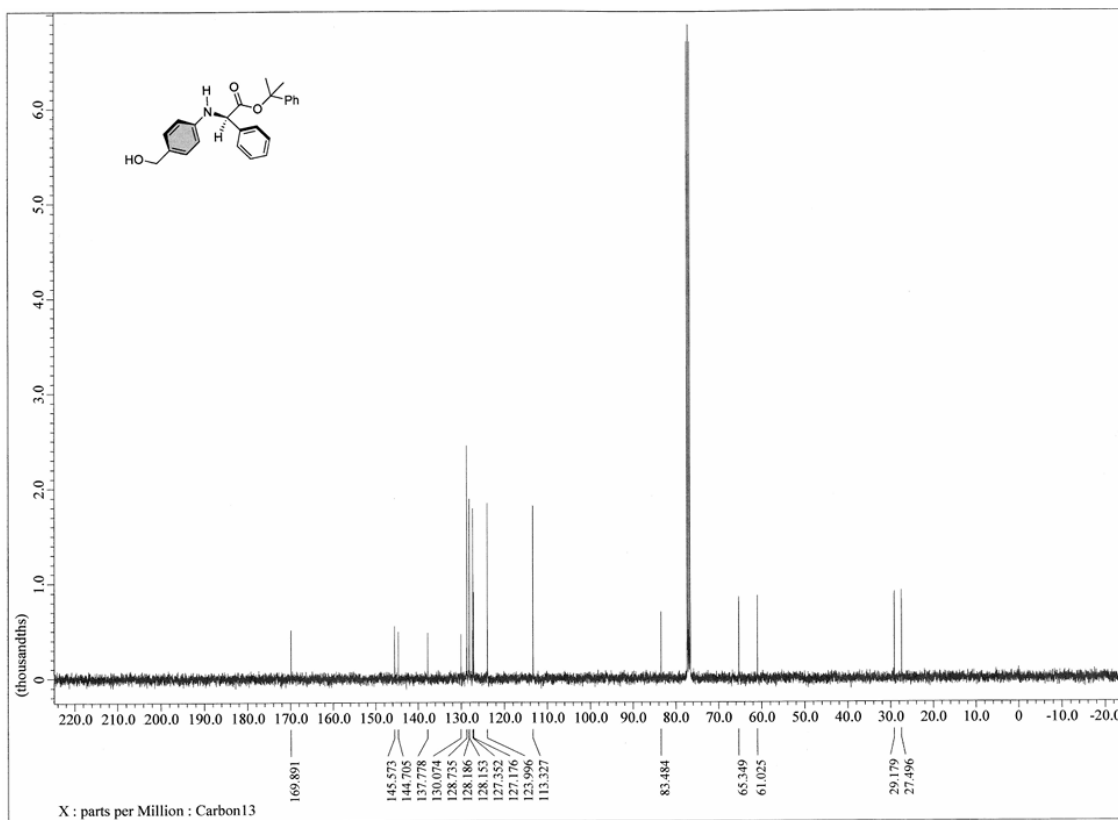

3

0528 yk-ts-03-180\_002 2026/05/28 18:53:27

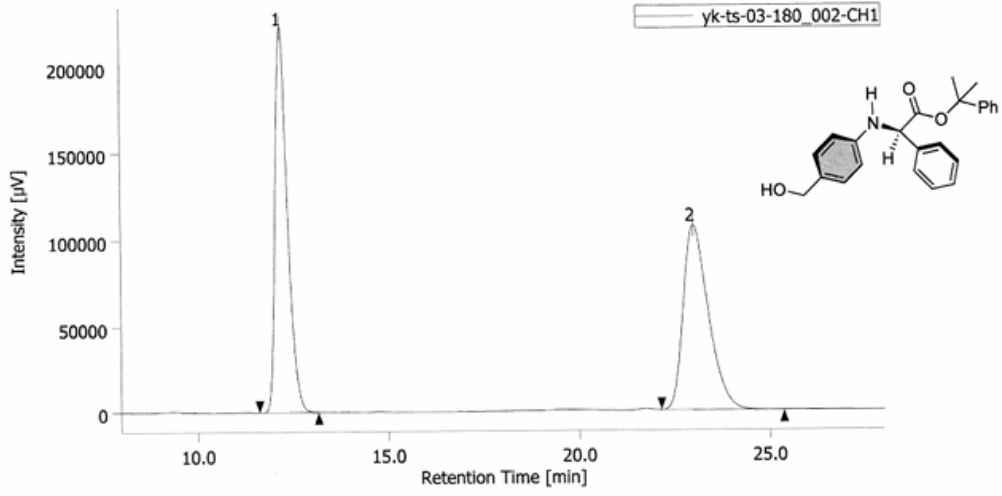

| # | tR [min] | Area [µV·sec] | Area%  | Height [µV] [µV] | Height% |
|---|----------|---------------|--------|------------------|---------|
| 1 | 12.208   | 5019375       | 50.407 | 223612           | 67.575  |
| 2 | 23.017   | 4938260       | 49.593 | 107296           | 32.425  |

1008 yk-ts-04-304\_001 2026/05/28 18:53:45

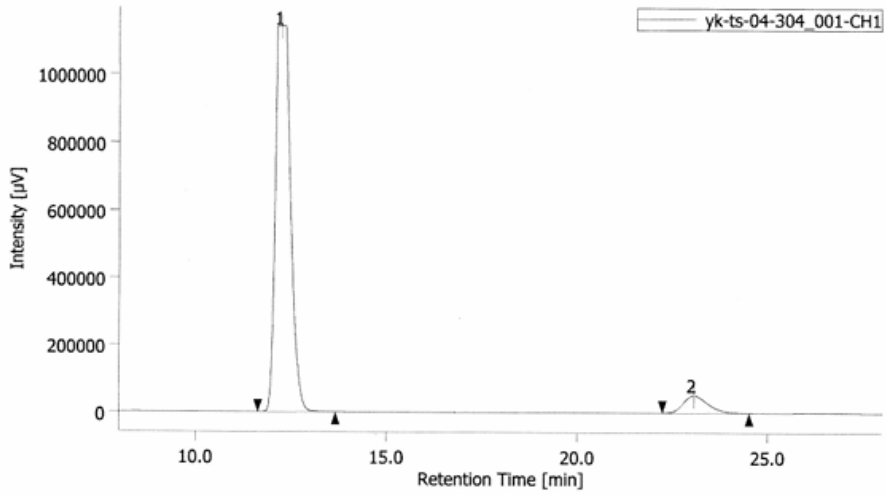

| # | tR [min] | Area [µV·sec] | Area%  | Height [µV] [µV] | Height% |
|---|----------|---------------|--------|------------------|---------|
| 1 | 12.267   | 31979450      | 93.256 | 1140739          | 95.717  |
| 2 | 23.058   | 2312829       | 6.744  | 51045            | 4.283   |

1

2

1

9b

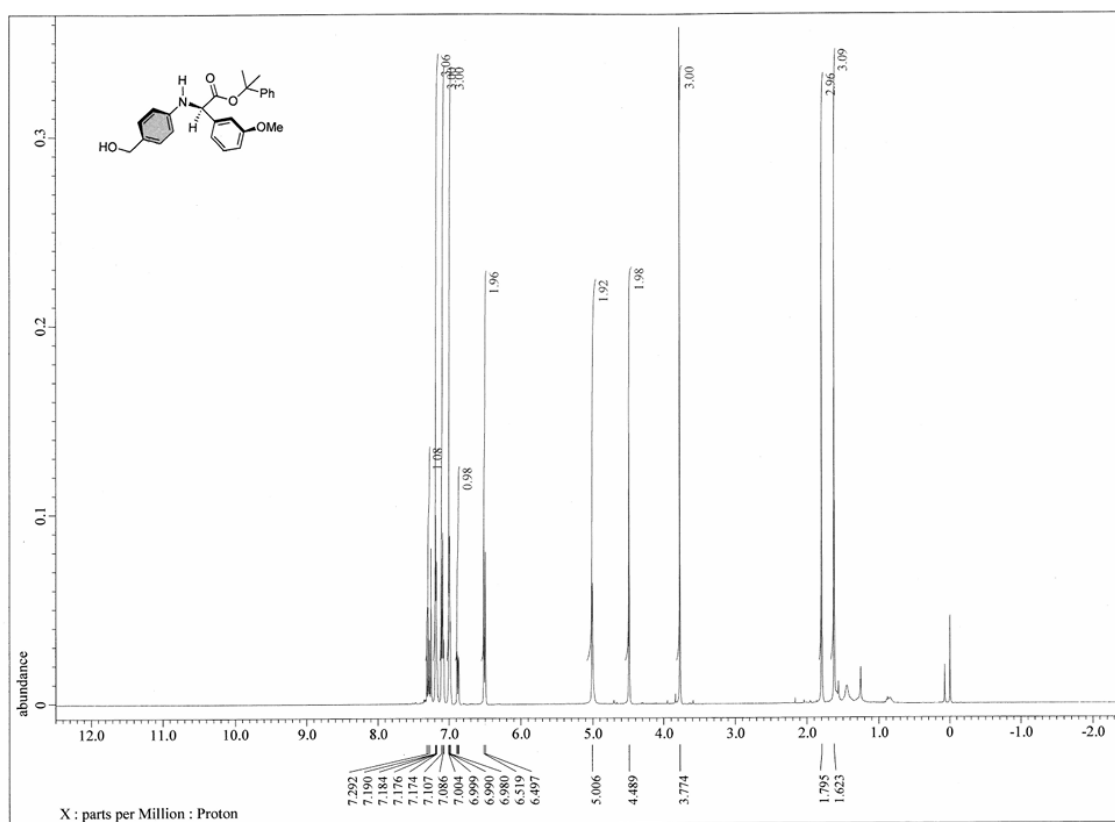

2

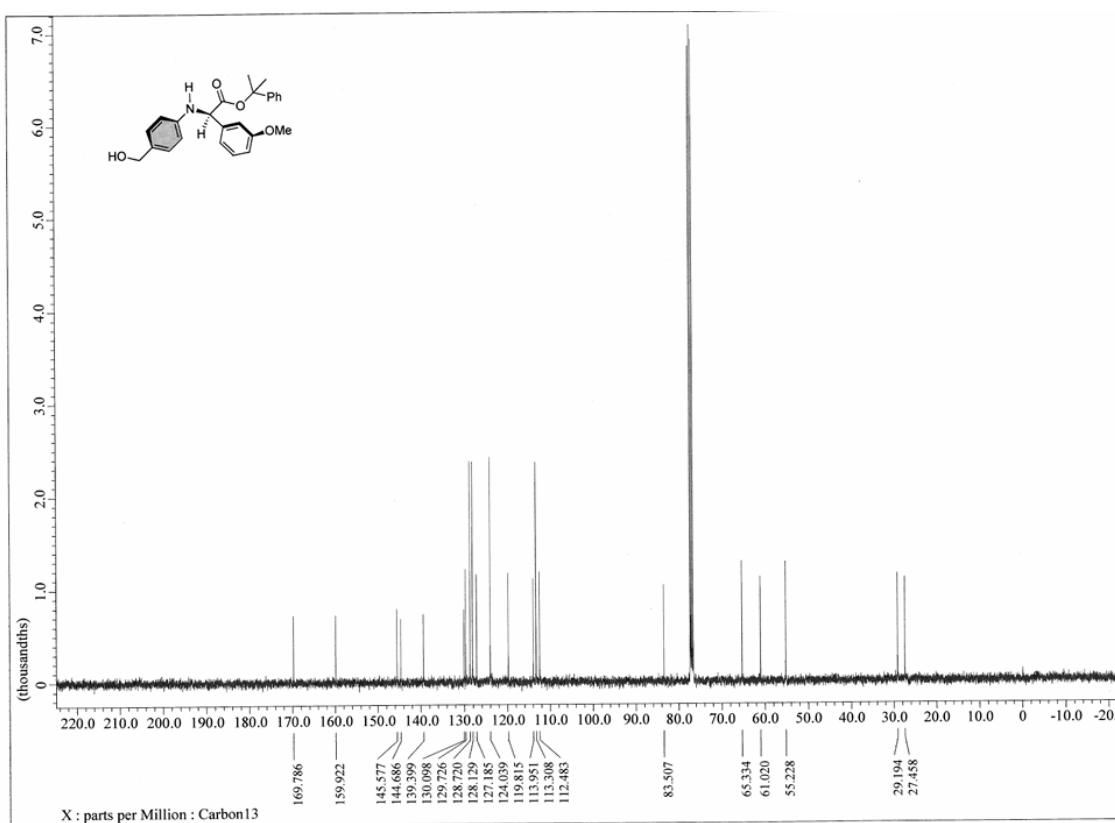

3

1

9c

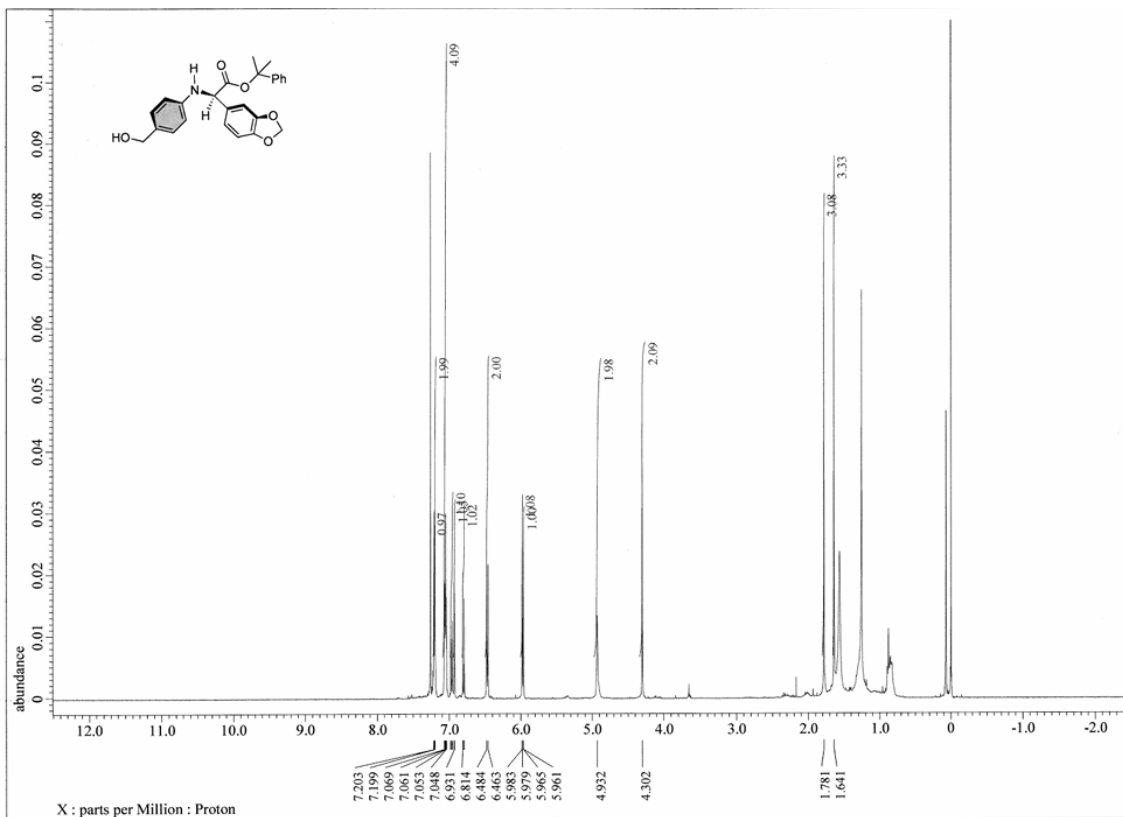

2

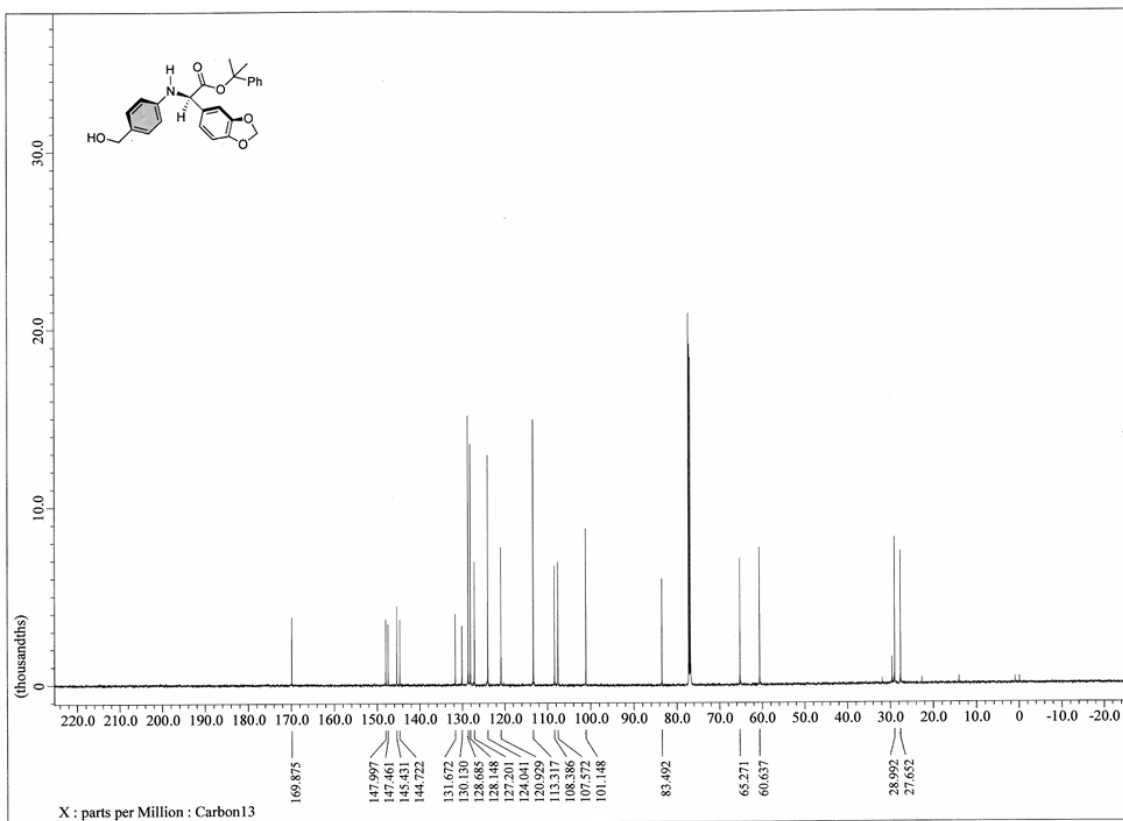

3

0123 yk-ts-06-439\_001 2026/05/23 1:50:09

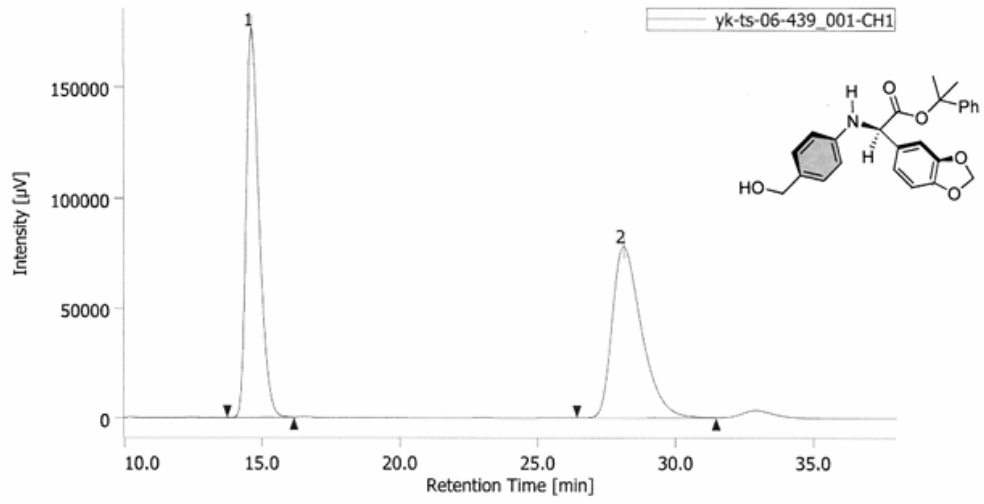

| # | tR [min] | Area [µV·sec] | Area%  | Height [µV] [µV] | Height% |
|---|----------|---------------|--------|------------------|---------|
| 1 | 14.650   | 5819183       | 50.174 | 176553           | 69.345  |
| 2 | 28.125   | 5778881       | 49.826 | 78049            | 30.655  |

0201 yk-ts-06-442\_001 2026/05/23 1:50:44

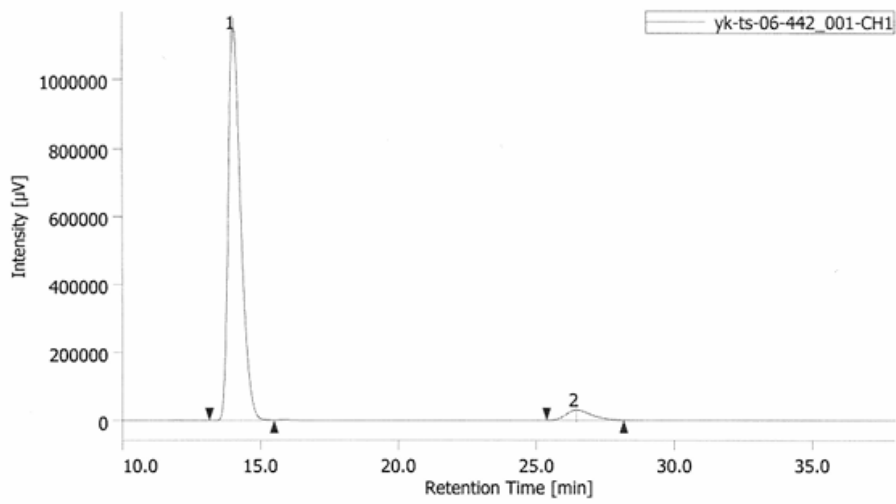

| # | tR [min] | Area [µV·sec] | Area%  | Height [µV] [µV] | Height% |
|---|----------|---------------|--------|------------------|---------|
| 1 | 14.033   | 36429982      | 95.033 | 1141565          | 97.487  |
| 2 | 26.450   | 1904016       | 4.967  | 29427            | 2.513   |

1

2

1

9d

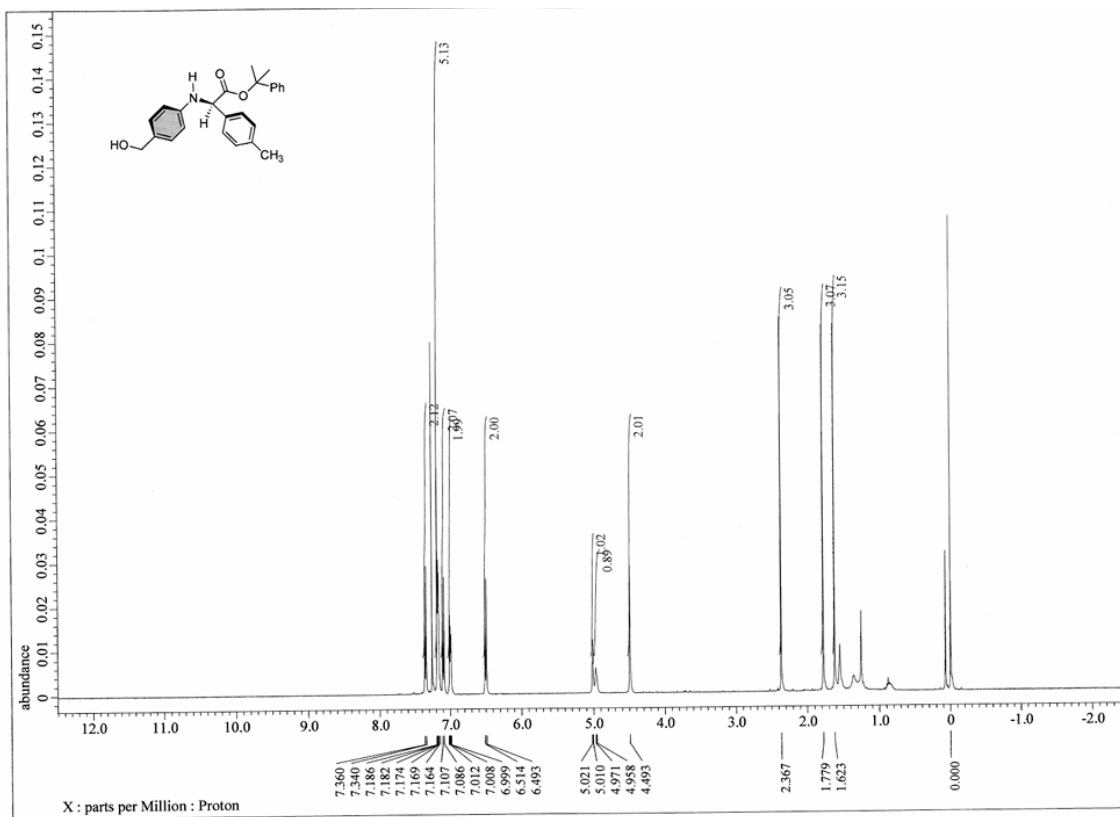

2

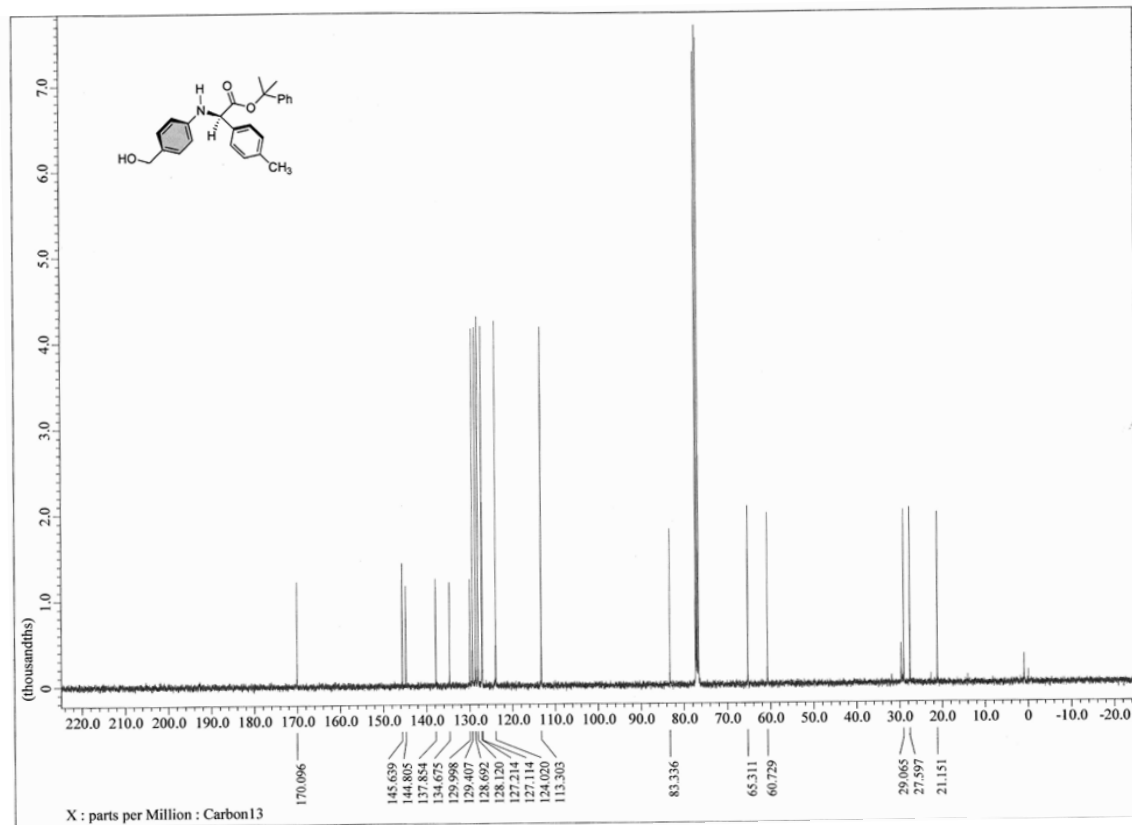

3

0206 yk-ts-06-451\_001 2026/05/26 17:44:49

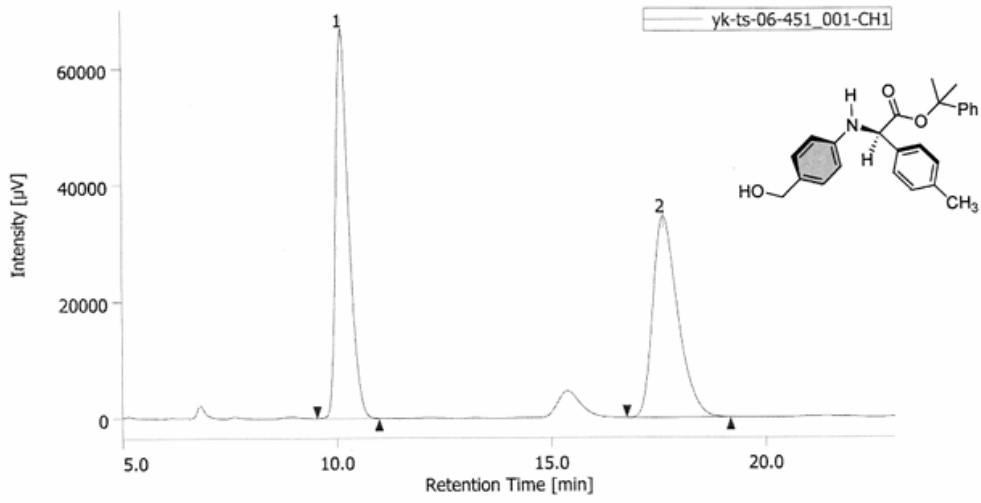

| # | tR [min] | Area [µV·sec] | Area%  | Height [µV] [µV] | Height% |
|---|----------|---------------|--------|------------------|---------|
| 1 | 10.125   | 1416688       | 50.217 | 67027            | 66.018  |
| 2 | 17.617   | 1404423       | 49.783 | 34501            | 33.982  |

0209 yk-ts-06-456\_001 2026/05/26 17:45:02

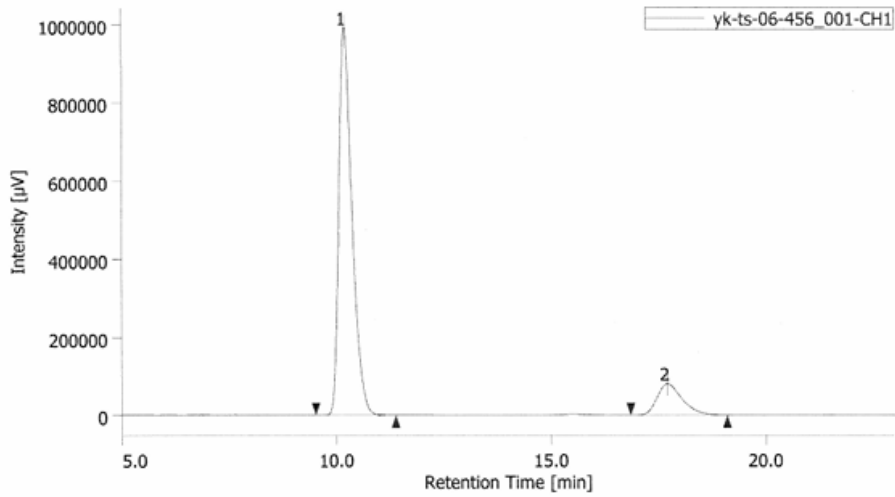

| # | tR [min] | Area [µV·sec] | Area%  | Height [µV] [µV] | Height% |
|---|----------|---------------|--------|------------------|---------|
| 1 | 10.192   | 21212244      | 86.677 | 995072           | 92.520  |
| 2 | 17.708   | 3260449       | 13.323 | 80443            | 7.480   |

1  
2  
3

1

9e

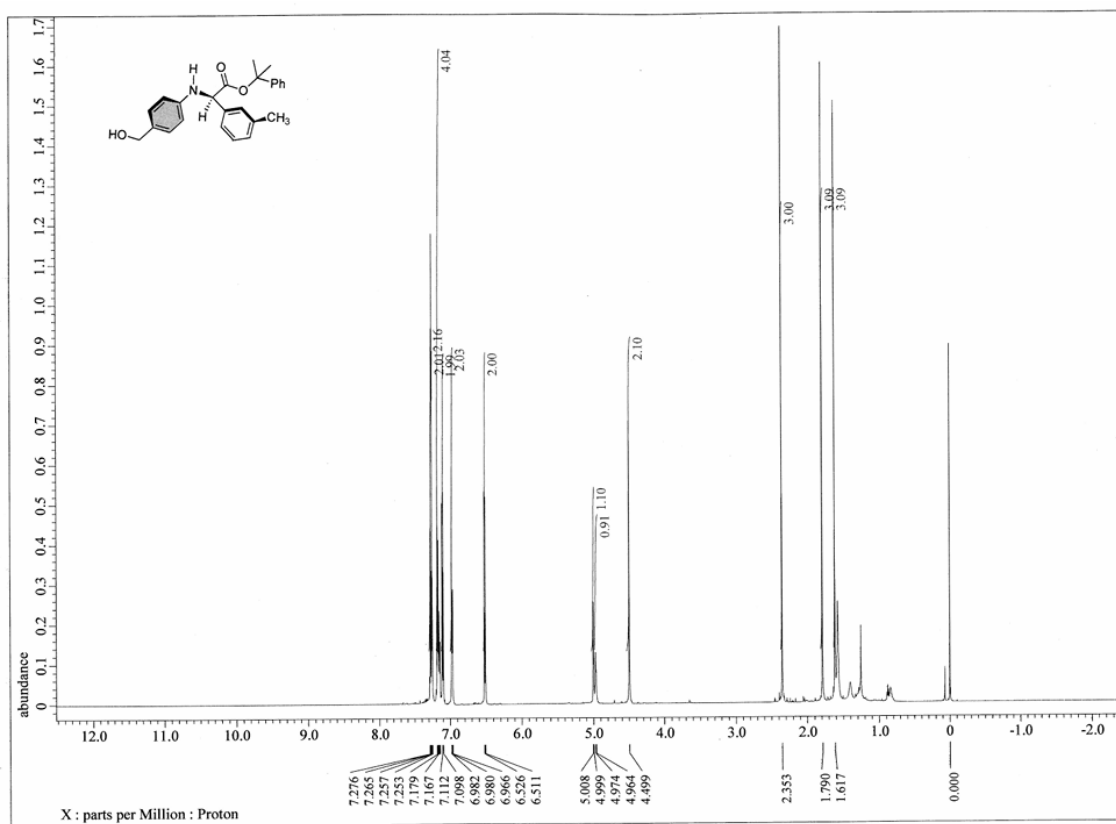

2

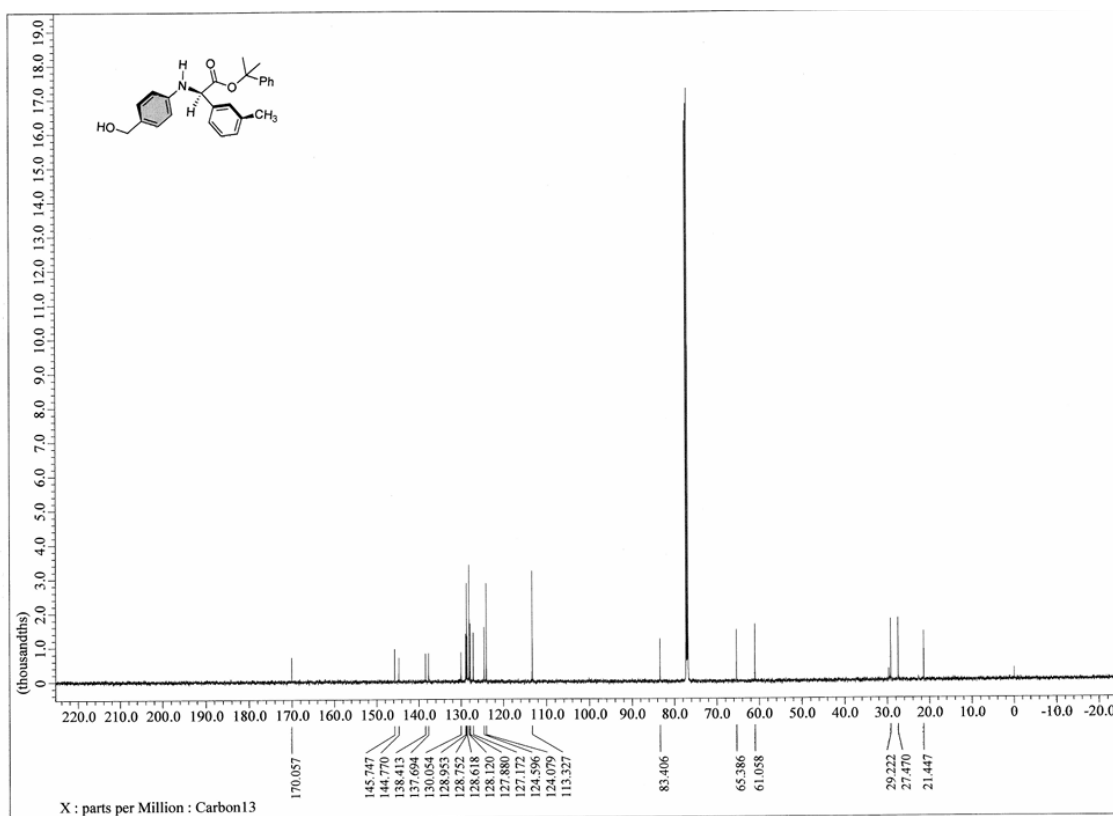

3

0107 yk-ts-06-413\_001 2026/06/13 13:32:14

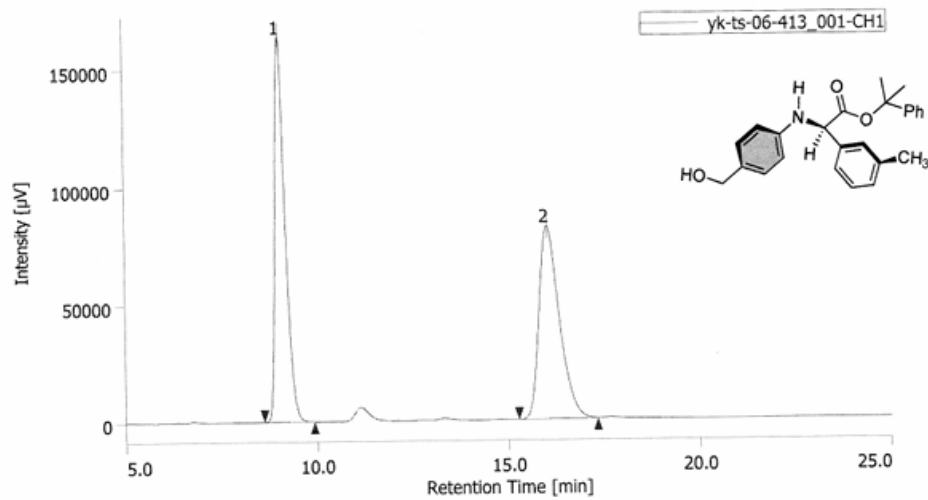

| # | tR [min] | Area [ $\mu\text{V}\cdot\text{sec}$ ] | Area%  | Height [ $\mu\text{V}$ ] [ $\mu\text{V}$ ] | Height% |
|---|----------|---------------------------------------|--------|--------------------------------------------|---------|
| 1 | 9.058    | 3049977                               | 50.258 | 164121                                     | 66.619  |
| 2 | 16.042   | 3018617                               | 49.742 | 82238                                      | 33.381  |

0613 08-554-re\_001 2026/06/13 13:32:21

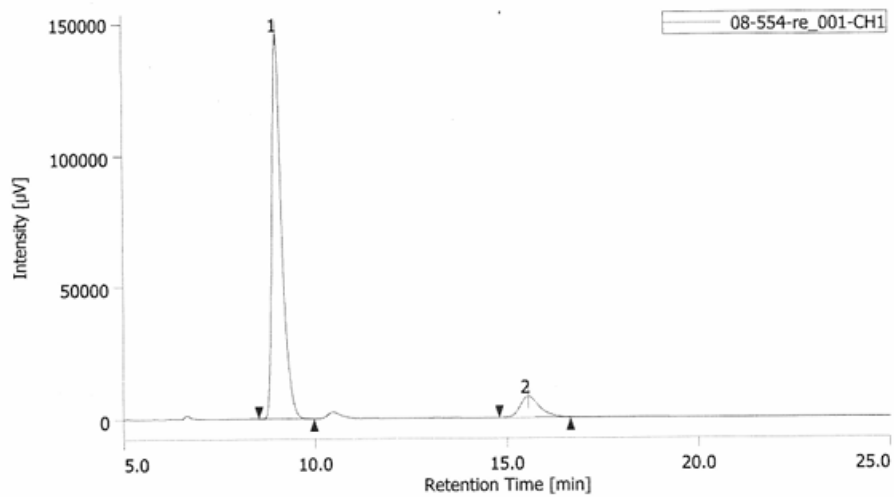

| # | tR [min] | Area [ $\mu\text{V}\cdot\text{sec}$ ] | Area%  | Height [ $\mu\text{V}$ ] [ $\mu\text{V}$ ] | Height% |
|---|----------|---------------------------------------|--------|--------------------------------------------|---------|
| 1 | 9.008    | 2557548                               | 90.022 | 146463                                     | 94.820  |
| 2 | 15.558   | 283488                                | 9.978  | 8001                                       | 5.180   |

- 1
- 2
- 3

1

9f

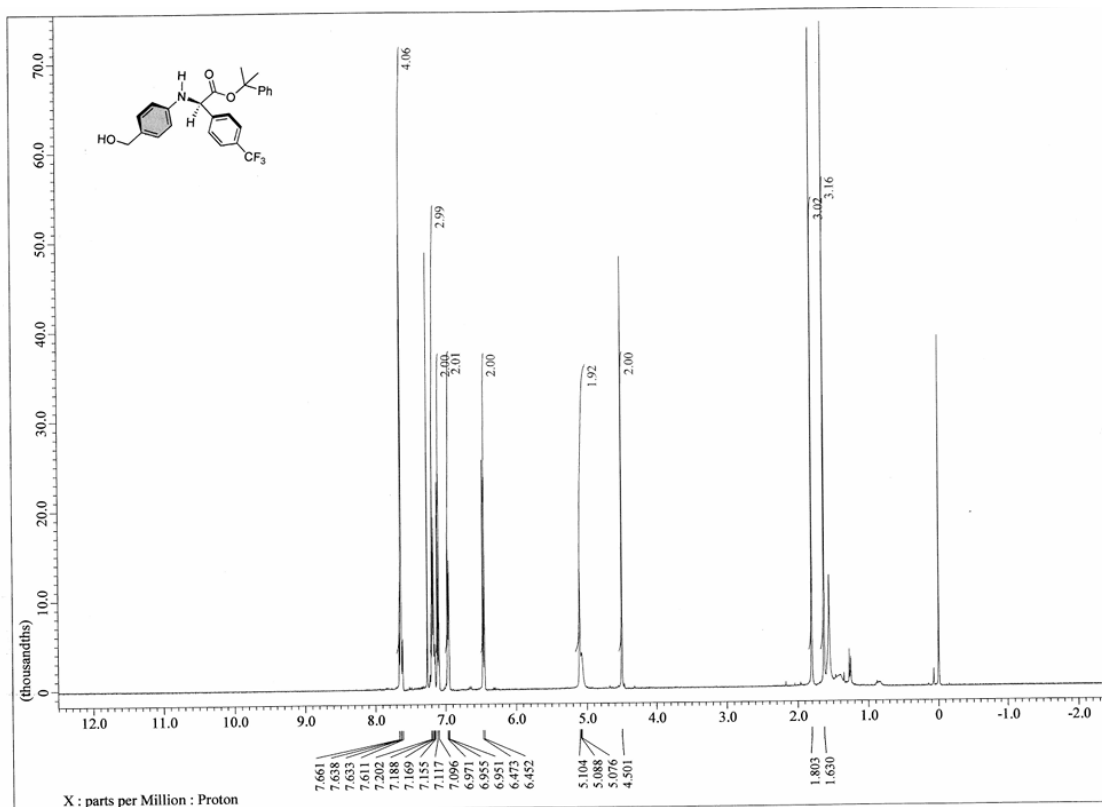

2

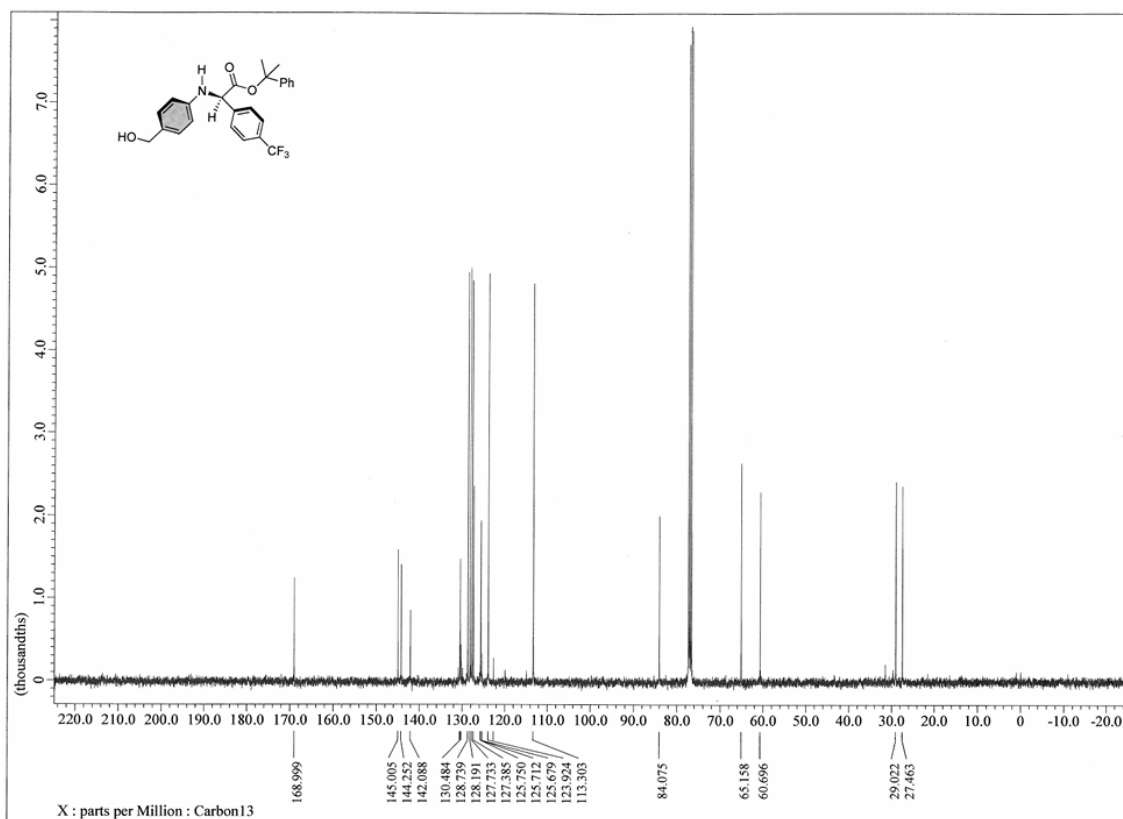

3

0227 07-481\_001 2026/06/16 12:56:28

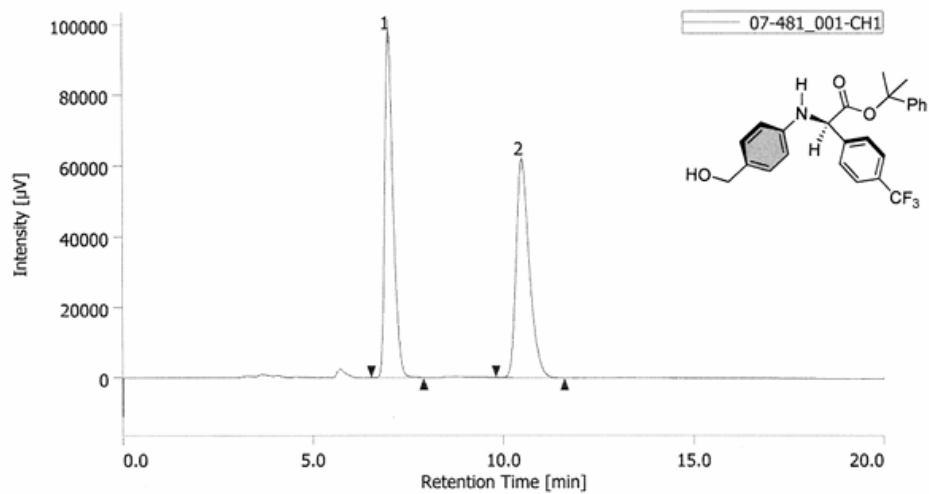

| # | tR [min] | Area [ $\mu\text{V}\cdot\text{sec}$ ] | Area%  | Height [ $\mu\text{V}$ ] [ $\mu\text{V}$ ] | Height% |
|---|----------|---------------------------------------|--------|--------------------------------------------|---------|
| 1 | 6.992    | 1498794                               | 50.104 | 98258                                      | 61.331  |
| 2 | 10.492   | 1492545                               | 49.896 | 61951                                      | 38.669  |

0303 07-486\_001 2026/06/16 12:56:20

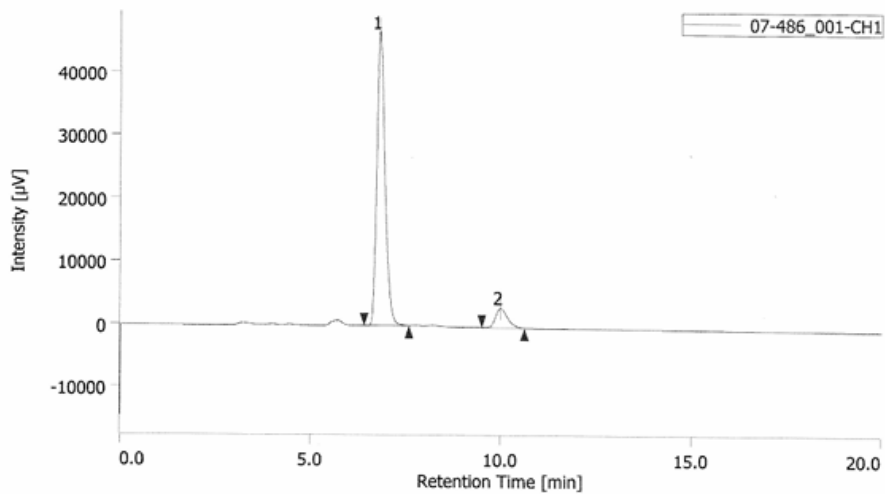

| # | tR [min] | Area [ $\mu\text{V}\cdot\text{sec}$ ] | Area%  | Height [ $\mu\text{V}$ ] [ $\mu\text{V}$ ] | Height% |
|---|----------|---------------------------------------|--------|--------------------------------------------|---------|
| 1 | 6.817    | 697810                                | 91.097 | 46922                                      | 93.781  |
| 2 | 10.000   | 68194                                 | 8.903  | 3112                                       | 6.219   |

- 1
- 2
- 3

1

9g

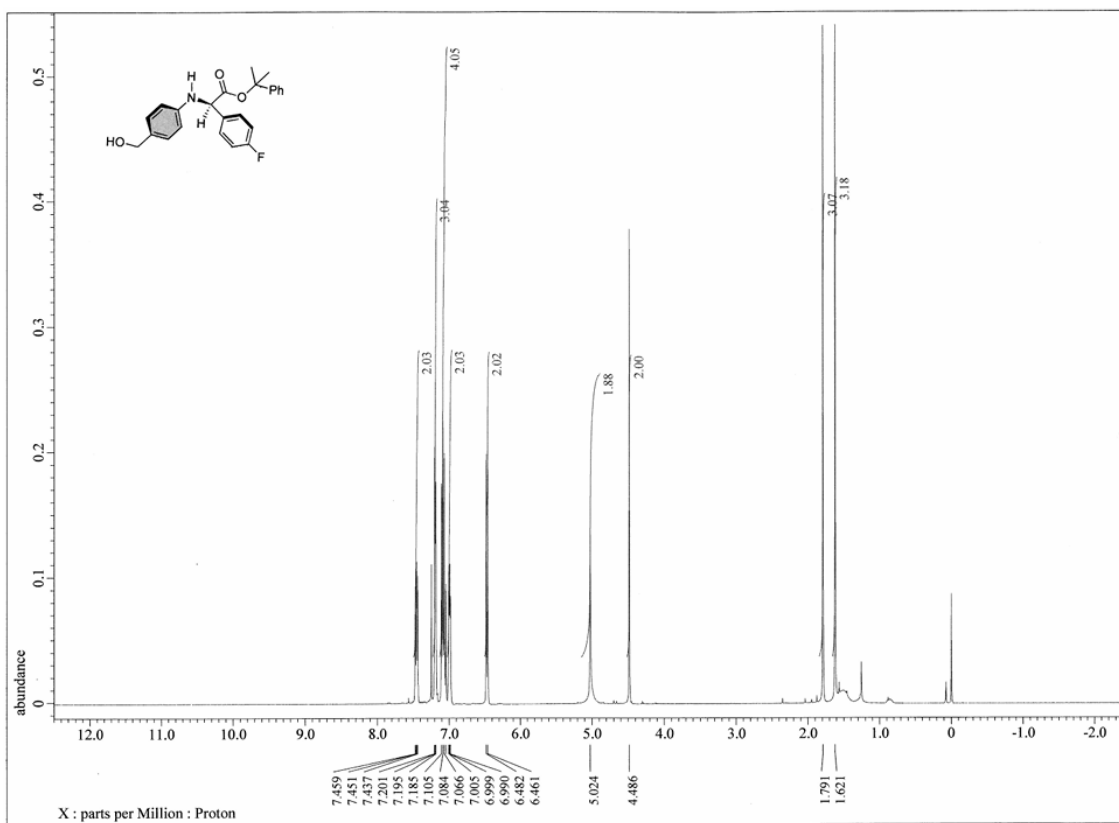

2

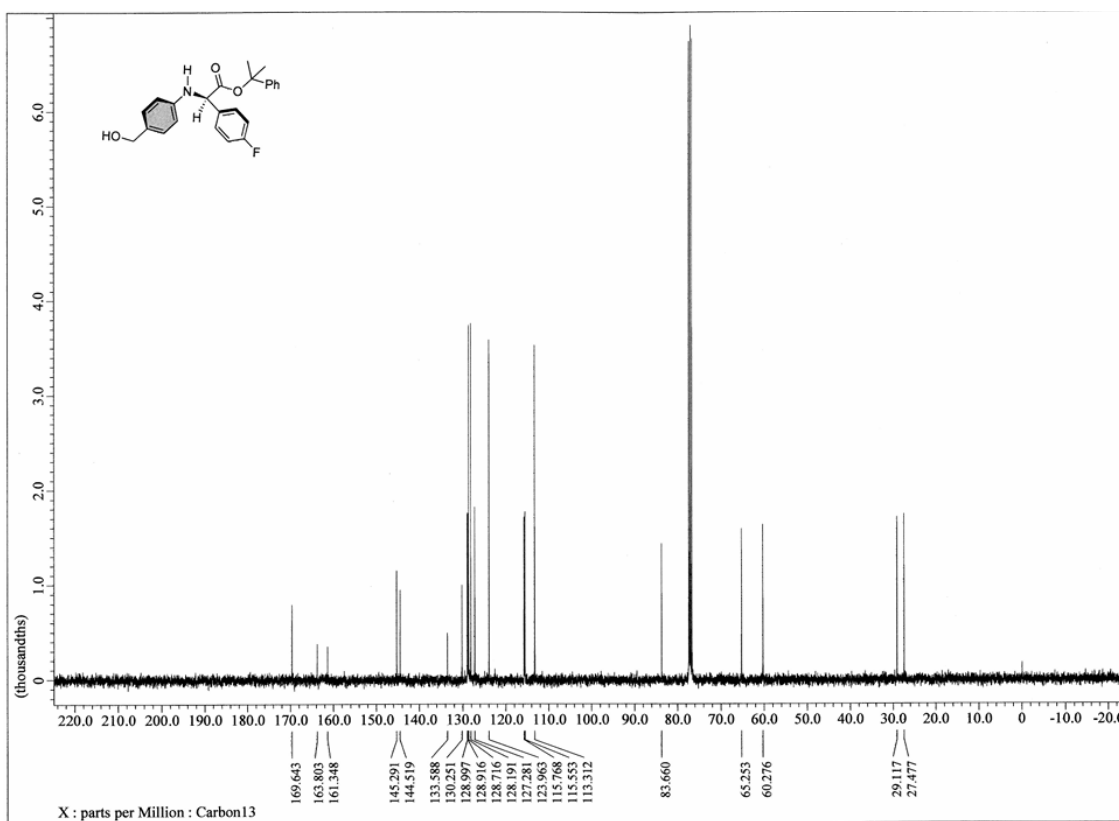

3

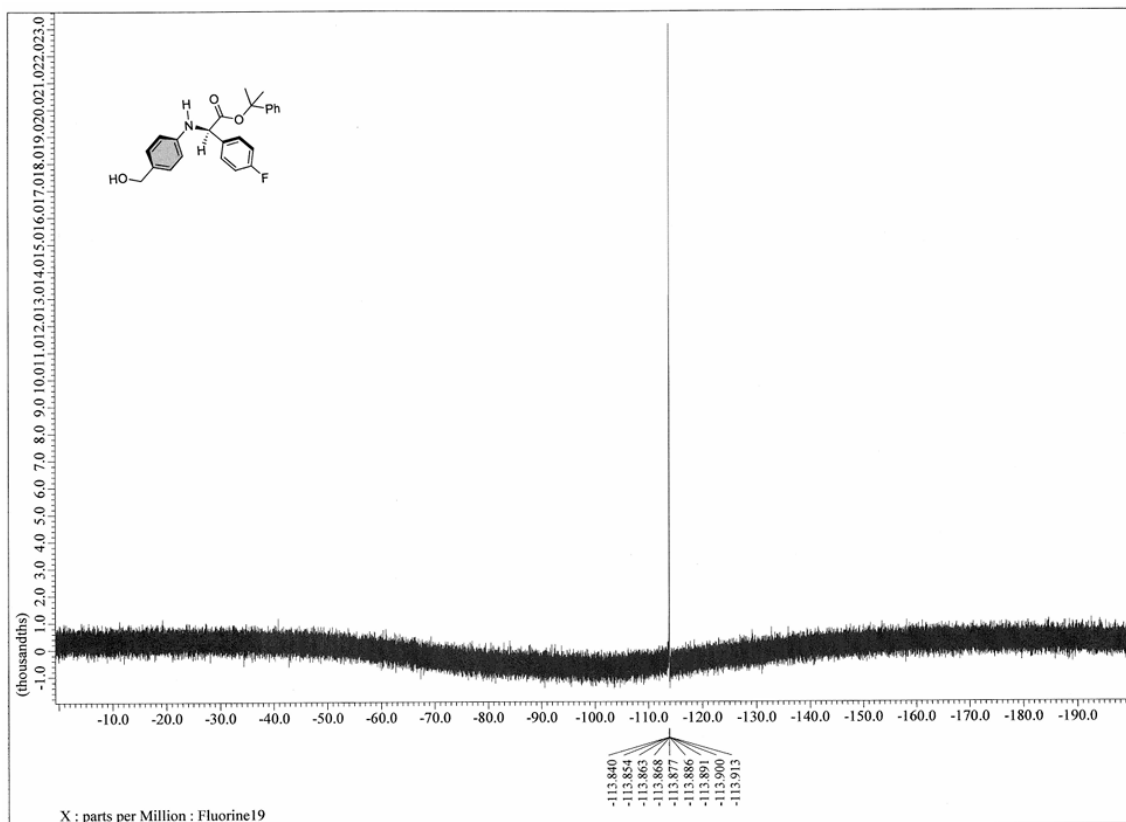

1  
2

0304 07-490\_001 2026/06/05 17:43:34

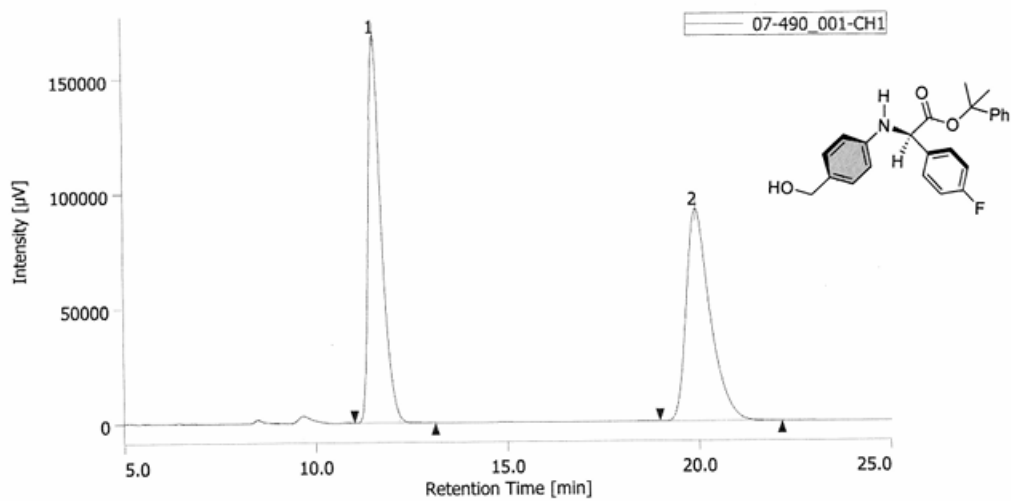

| # | tR [min] | Area [ $\mu\text{V}\cdot\text{sec}$ ] | Area%  | Height [ $\mu\text{V}$ ] | Height% |
|---|----------|---------------------------------------|--------|--------------------------|---------|
| 1 | 11.558   | 3986093                               | 50.025 | 169238                   | 64.712  |
| 2 | 19.933   | 3982175                               | 49.975 | 92287                    | 35.288  |

0310 07-500\_001 2026/06/05 17:43:42

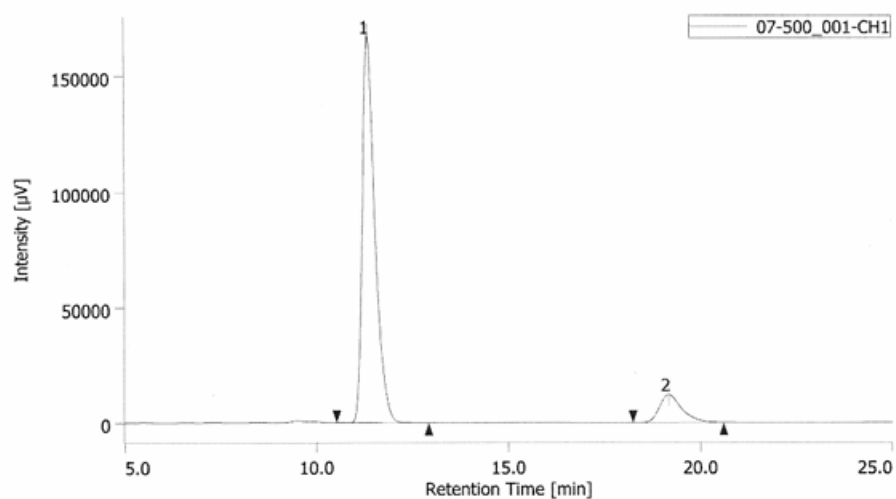

| # | tR [min] | Area [ $\mu\text{V}\cdot\text{sec}$ ] | Area%  | Height [ $\mu\text{V}$ ] | Height% |
|---|----------|---------------------------------------|--------|--------------------------|---------|
| 1 | 11.342   | 3817234                               | 88.675 | 167863                   | 93.263  |
| 2 | 19.167   | 487524                                | 11.325 | 12126                    | 6.737   |

1

9h

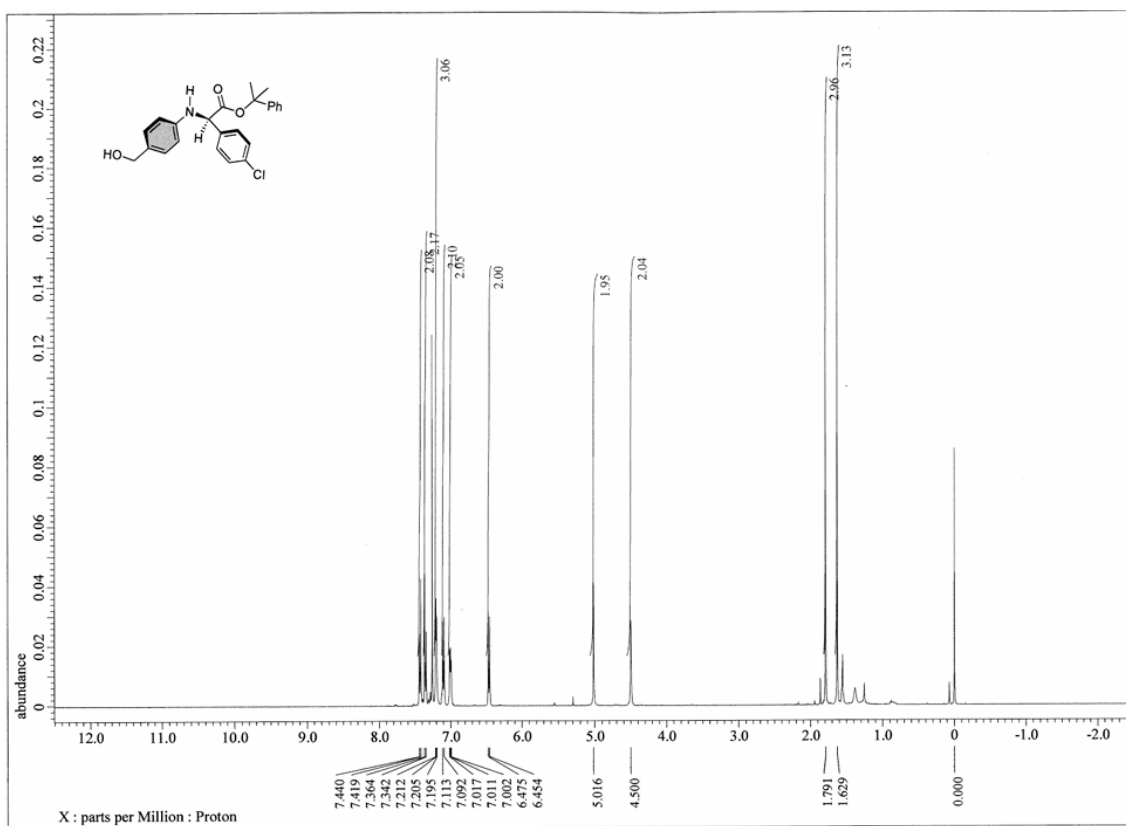

2

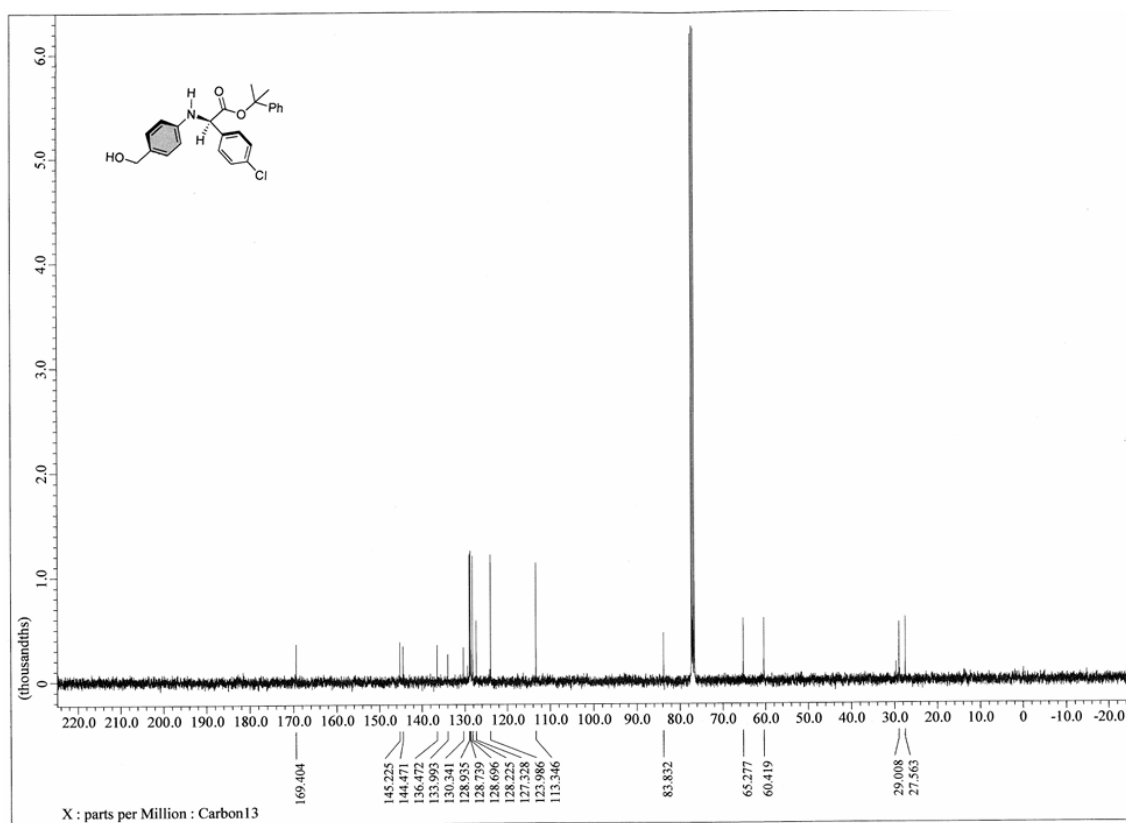

3

1022 yk-ts-05-323\_001 2026/05/28 13:49:02

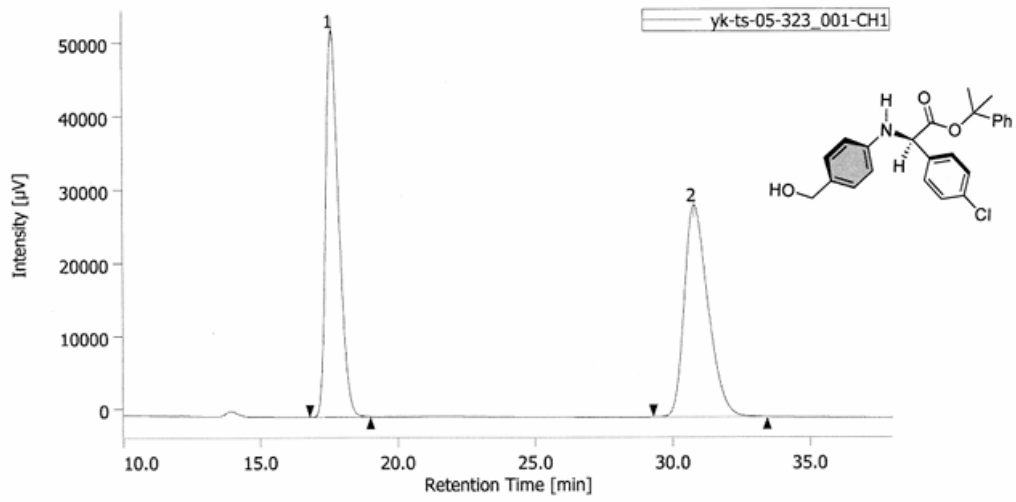

| # | tR [min] | Area [µV·sec] | Area%  | Height [µV] [µV] | Height% |
|---|----------|---------------|--------|------------------|---------|
| 1 | 17.825   | 1743998       | 49.967 | 53023            | 84.627  |
| 2 | 30.808   | 1746328       | 50.033 | 29021            | 35.373  |

1210 yk-ts-05-392\_001 2026/05/28 13:49:13

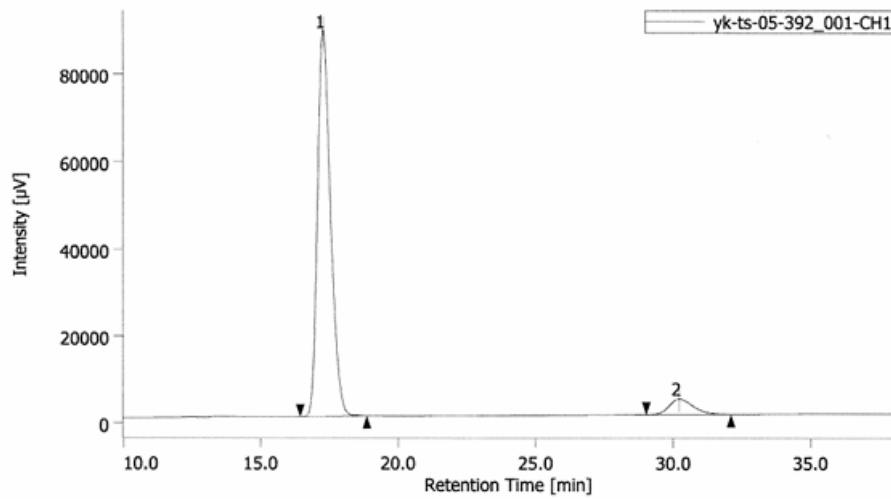

| # | tR [min] | Area [µV·sec] | Area%  | Height [µV] [µV] | Height% |
|---|----------|---------------|--------|------------------|---------|
| 1 | 17.283   | 2918186       | 93.216 | 88709            | 96.188  |
| 2 | 30.208   | 212361        | 6.784  | 3516             | 3.812   |

- 1
- 2
- 3

1

9i

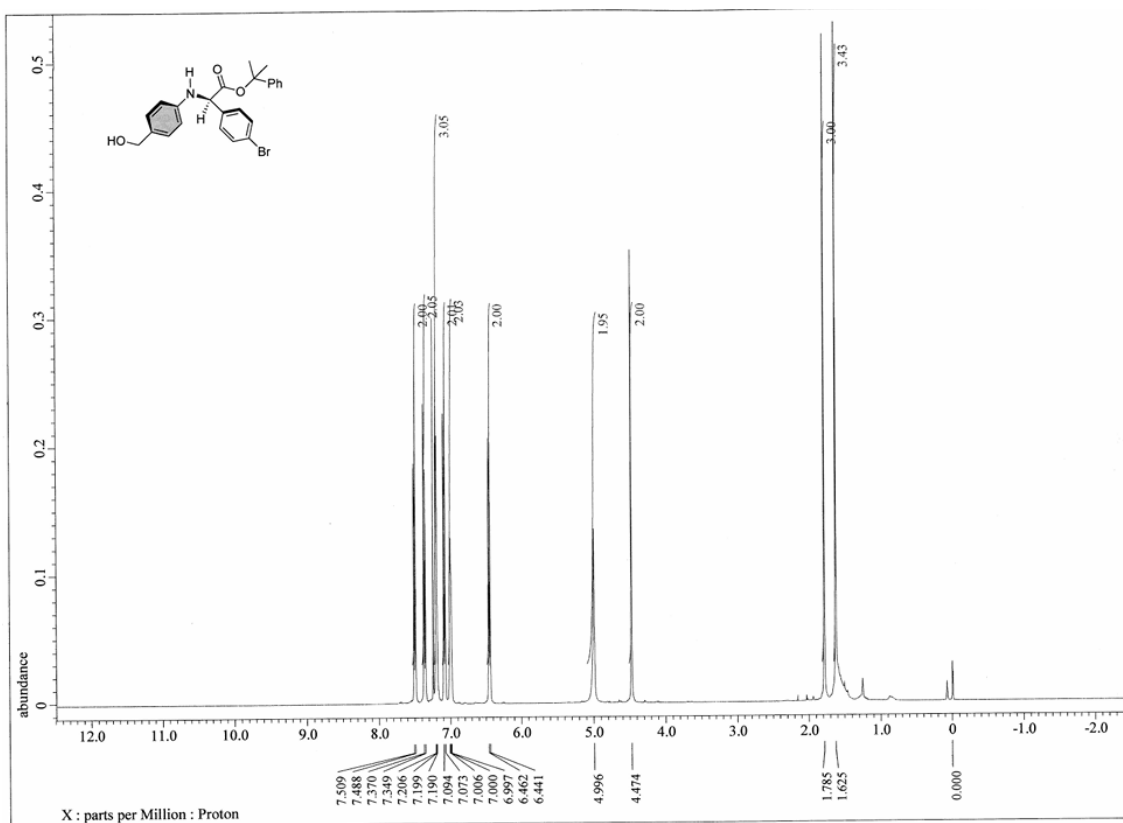

2

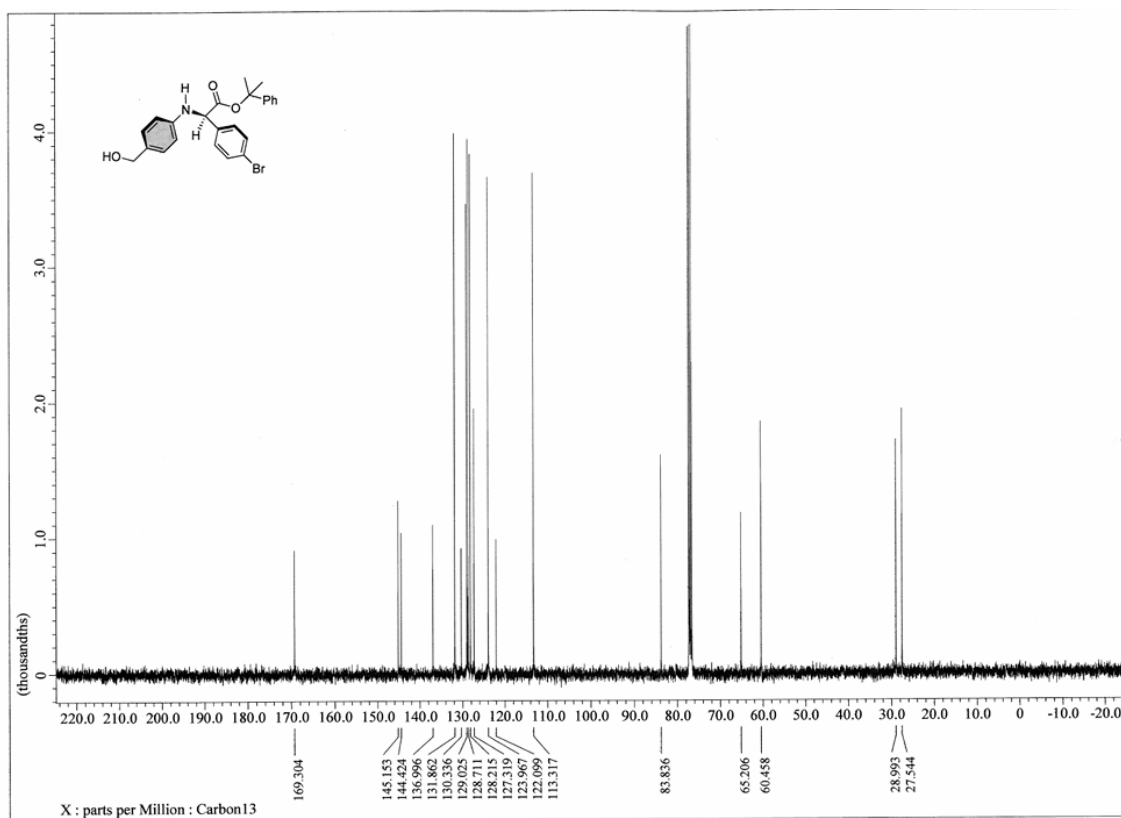

3

1007 yk-ts-04-306\_001 2026/05/28 13:52:41

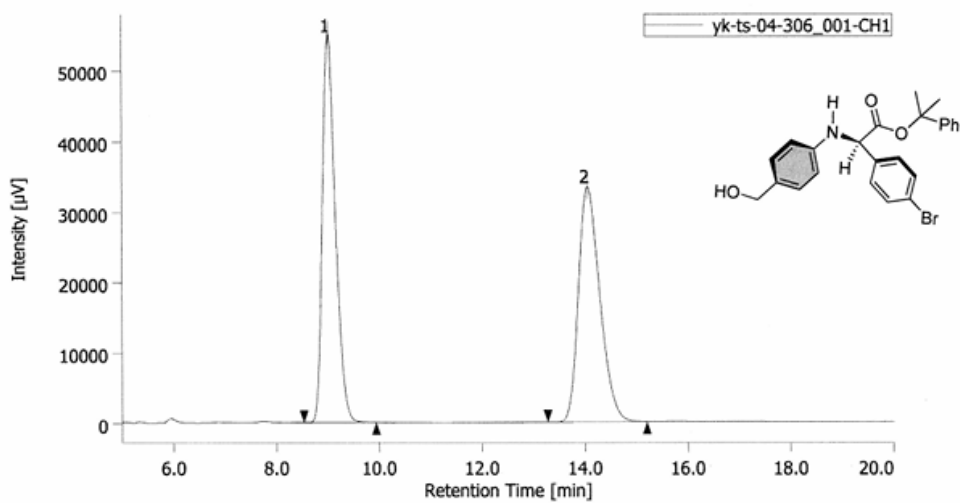

| # | tR [min] | Area [µV·sec] | Area%  | Height [µV] [µV] | Height% |
|---|----------|---------------|--------|------------------|---------|
| 1 | 9.017    | 965418        | 50.085 | 55068            | 62.208  |
| 2 | 14.058   | 962152        | 49.915 | 33454            | 37.792  |

0605 yk-ts-08-565\_001 2026/06/05 17:23:01

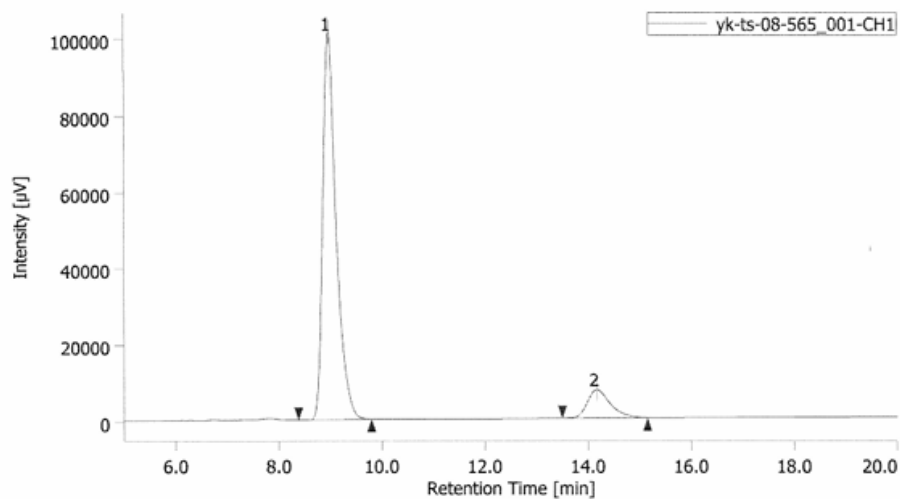

| # | tR [min] | Area [µV·sec] | Area%  | Height [µV] [µV] | Height% |
|---|----------|---------------|--------|------------------|---------|
| 1 | 8.975    | 1815018       | 89.064 | 101211           | 93.273  |
| 2 | 14.175   | 222868        | 10.936 | 7300             | 6.727   |

1  
2  
3

1

9j

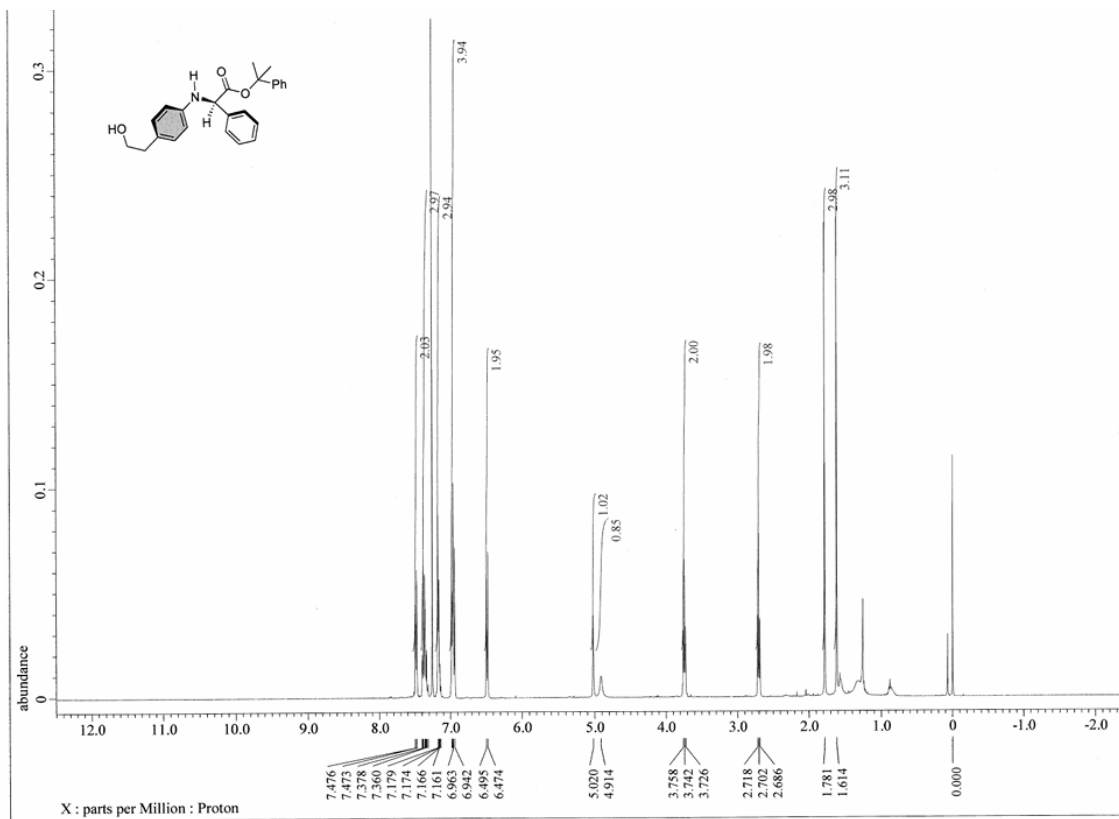

2

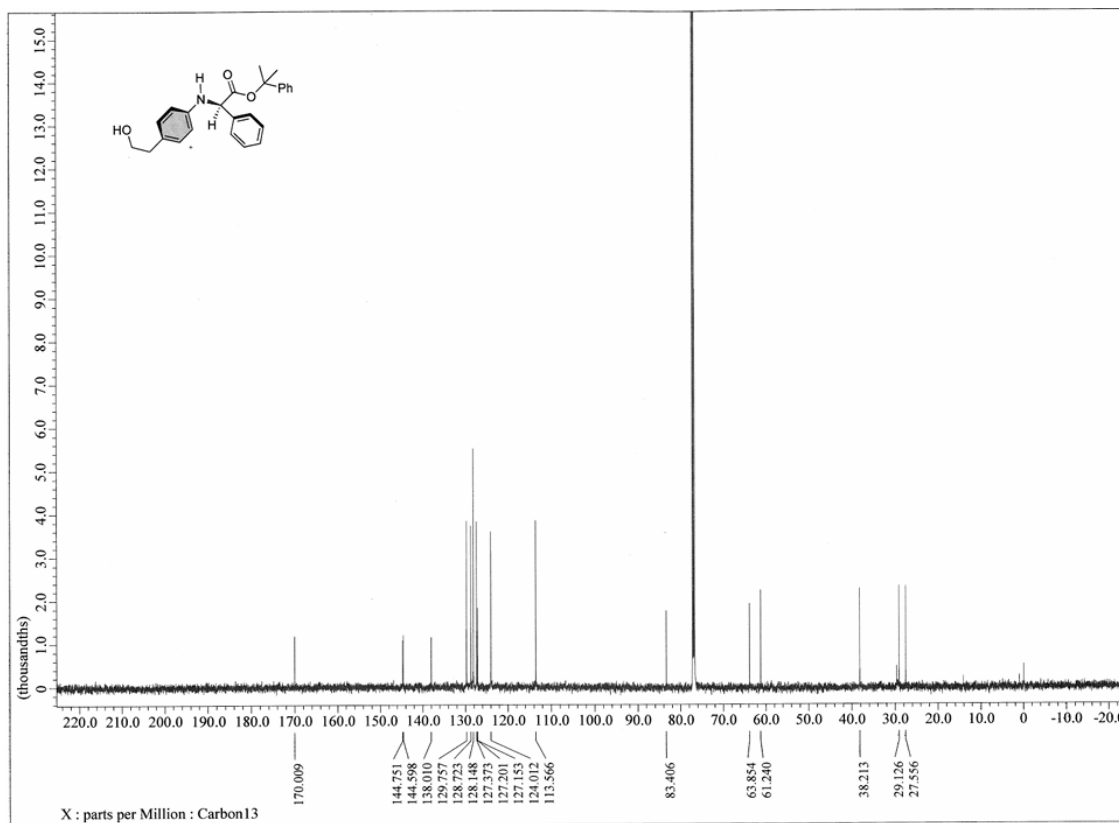

3

0624 yk-ts-03-220-C2H4OH\_004 2026/05/28 19:14:53

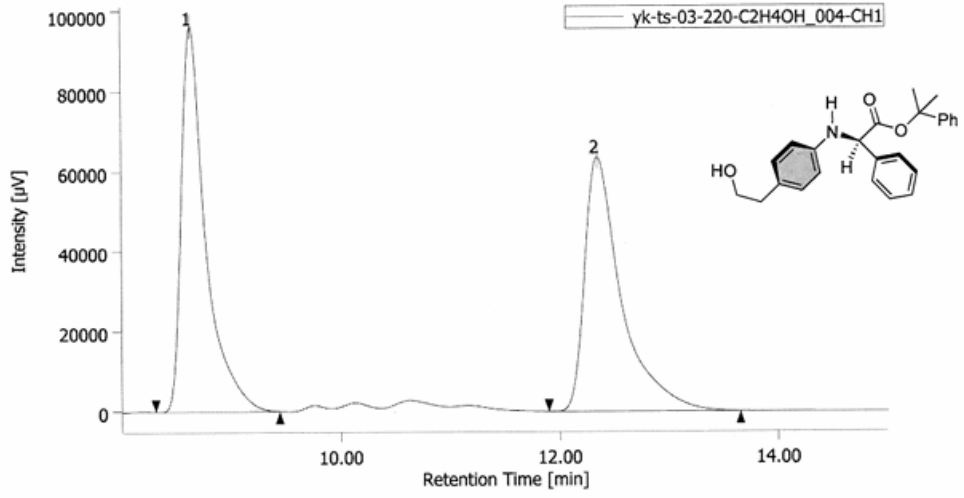

| # | tR [min] | Area [µV·sec] | Area%  | Height [µV] [µV] | Height% |
|---|----------|---------------|--------|------------------|---------|
| 1 | 8.633    | 1487838       | 50.162 | 96308            | 60.189  |
| 2 | 12.358   | 1478201       | 49.838 | 63702            | 39.811  |

0701 yk-ts-04-241\_001 2026/05/28 19:24:51

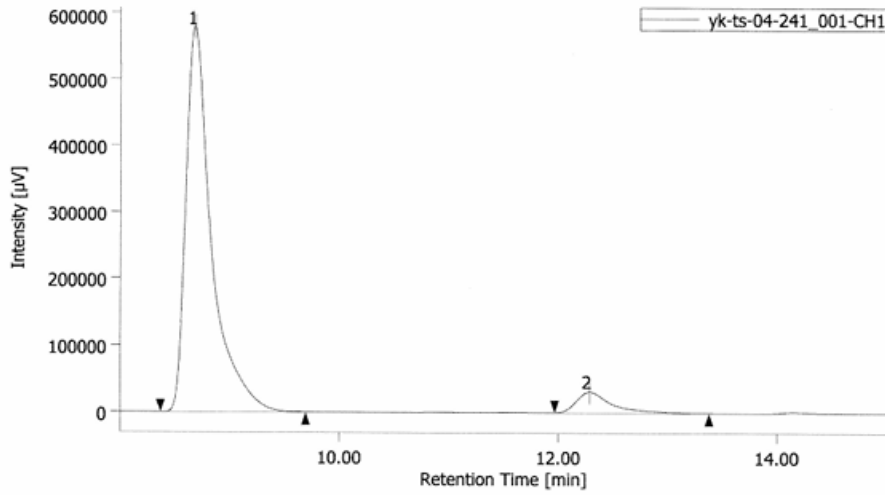

| # | tR [min] | Area [µV·sec] | Area%  | Height [µV] [µV] | Height% |
|---|----------|---------------|--------|------------------|---------|
| 1 | 8.683    | 9422366       | 93.101 | 579618           | 94.944  |
| 2 | 12.283   | 698211        | 6.899  | 30867            | 5.056   |

1  
2  
3

1

9k

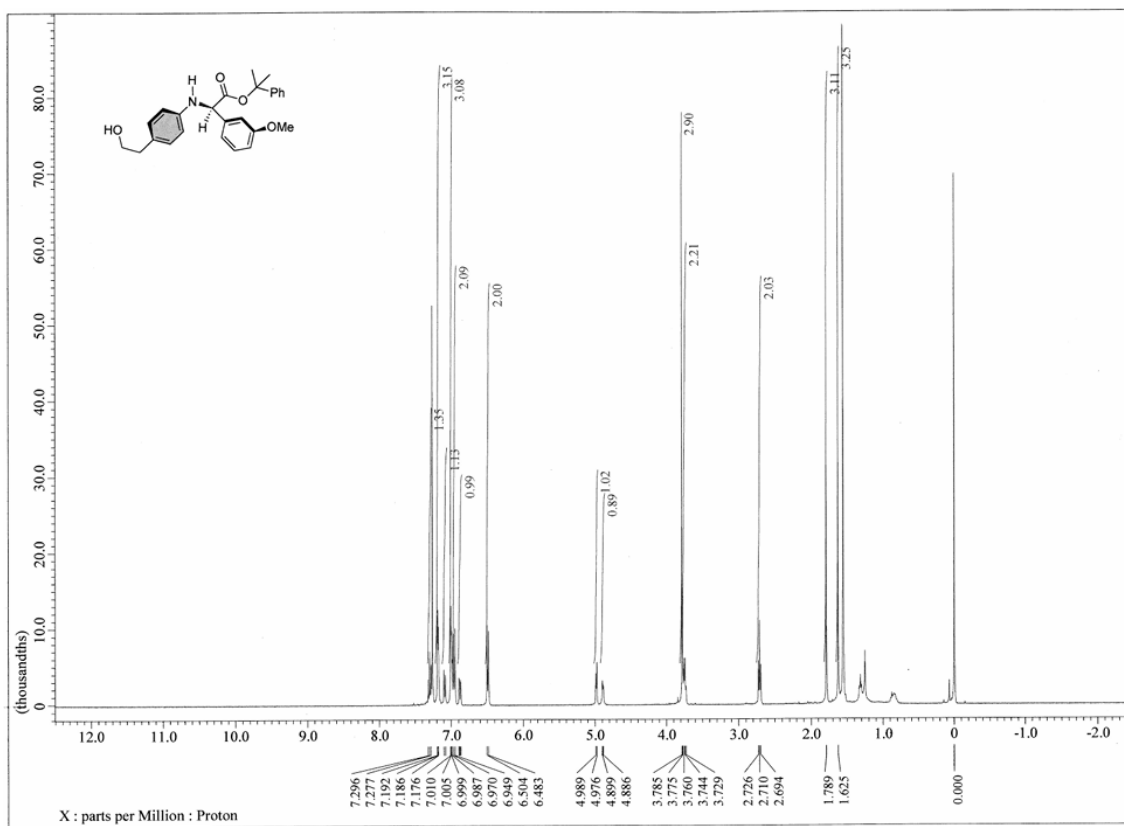

2

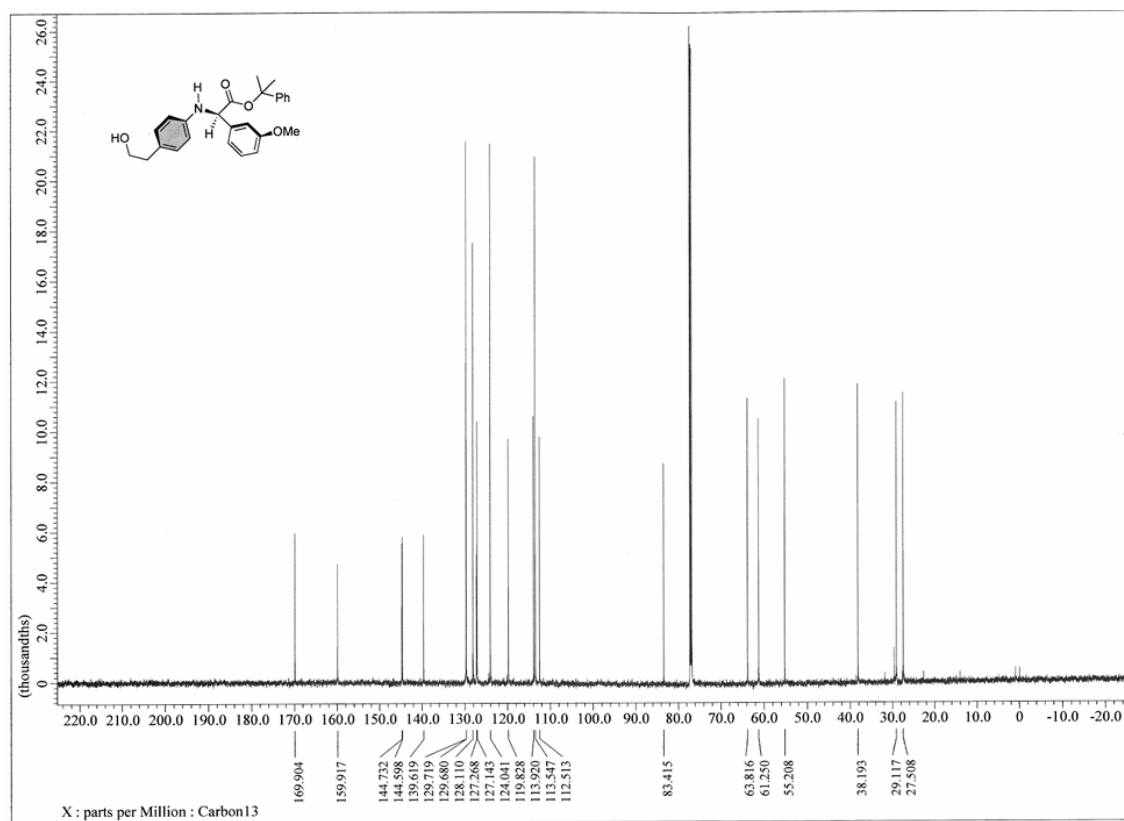

3

0425 07-524\_001 2026/06/16 16:16:04

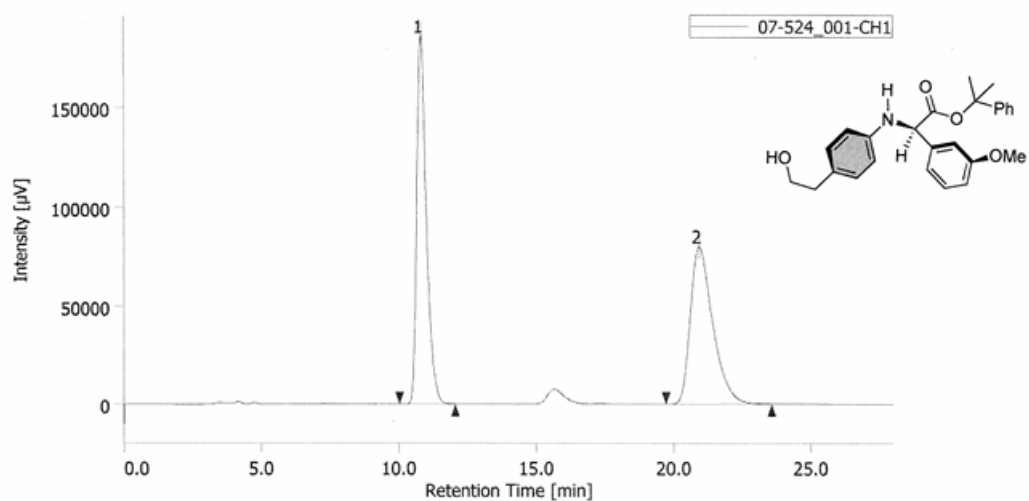

| # | tR [min] | Area [ $\mu\text{V}\cdot\text{sec}$ ] | Area%  | Height [ $\mu\text{V}$ ] [ $\mu\text{V}$ ] | Height% |
|---|----------|---------------------------------------|--------|--------------------------------------------|---------|
| 1 | 10.817   | 4541280                               | 50.090 | 186643                                     | 69.982  |
| 2 | 20.942   | 4524925                               | 49.910 | 80058                                      | 30.018  |

0513 yk-ts-07-536\_001 2026/06/16 16:14:23

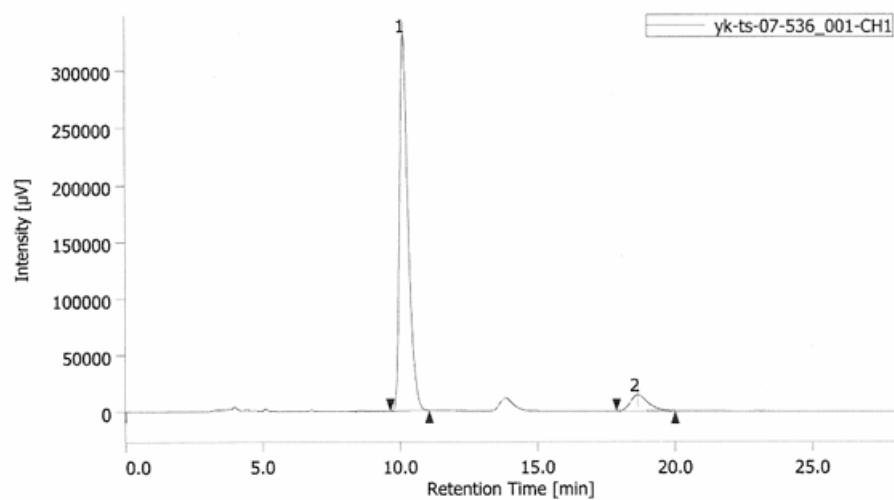

| # | tR [min] | Area [ $\mu\text{V}\cdot\text{sec}$ ] | Area%  | Height [ $\mu\text{V}$ ] [ $\mu\text{V}$ ] | Height% |
|---|----------|---------------------------------------|--------|--------------------------------------------|---------|
| 1 | 10.125   | 7228213                               | 91.854 | 330941                                     | 95.876  |
| 2 | 18.633   | 641033                                | 8.146  | 14234                                      | 4.124   |

1  
2  
3

1

91

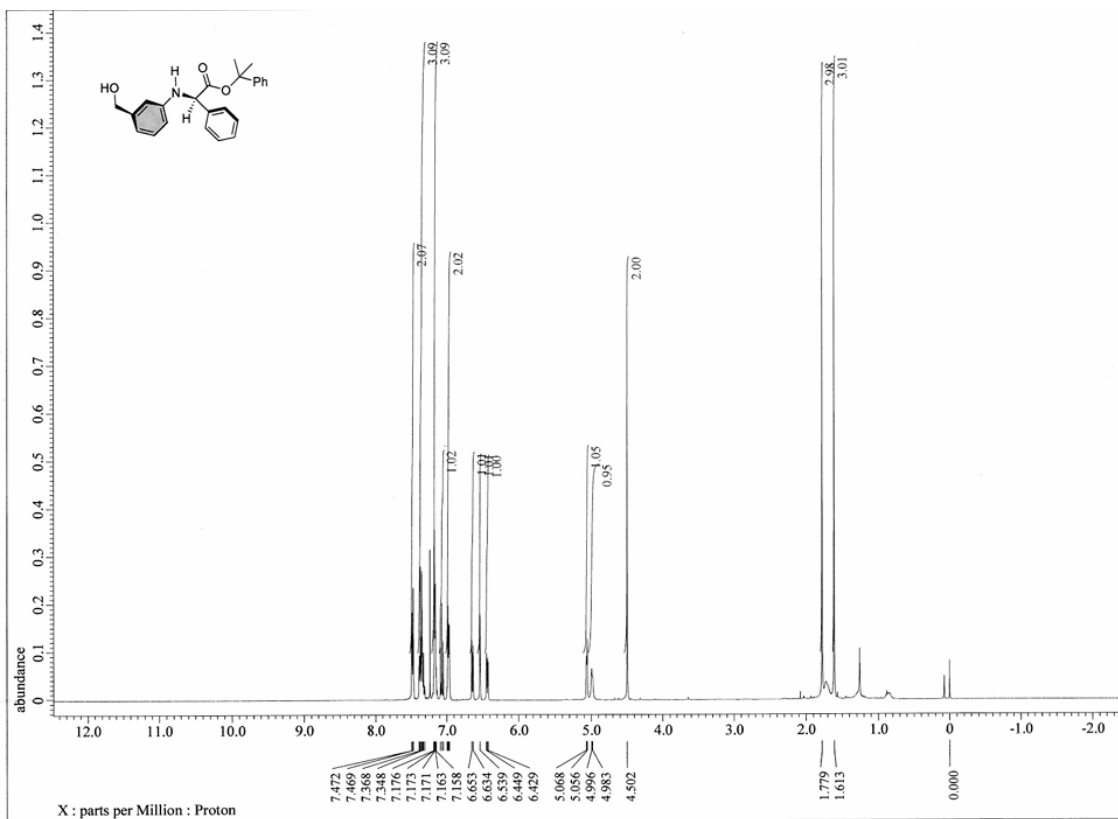

2

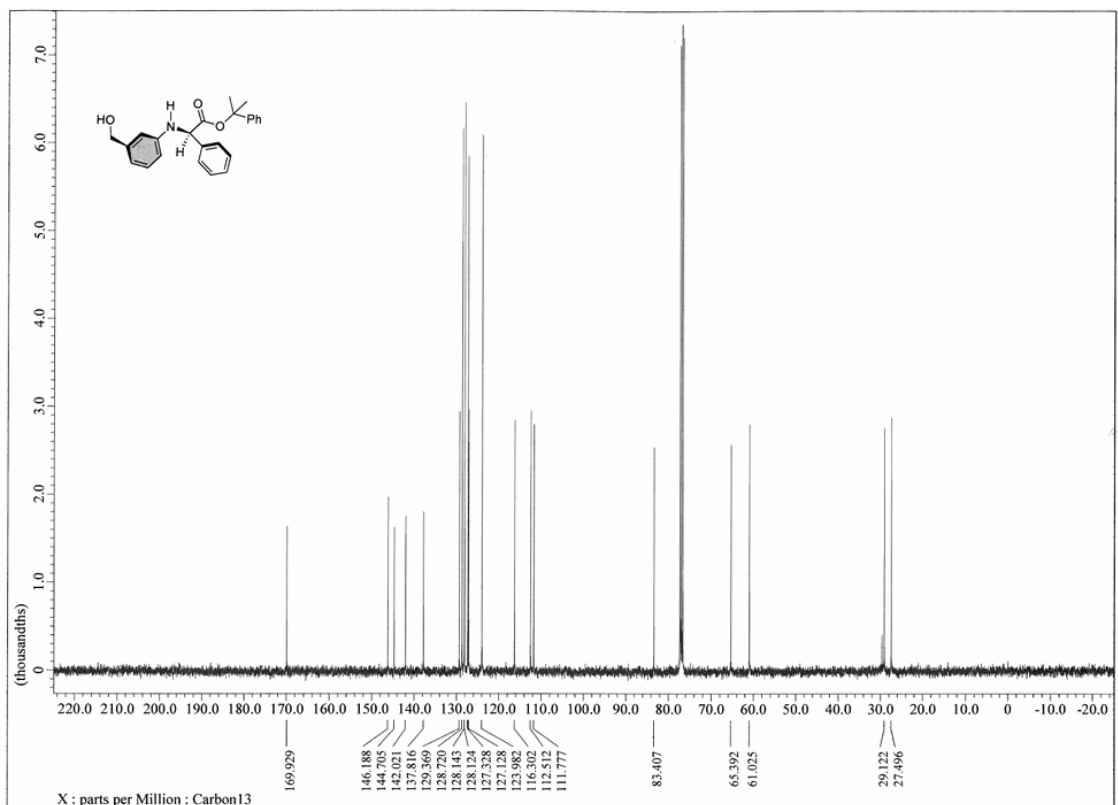

3

4

0522 yk-ts-07-545\_001 2026/05/26 18:03:39

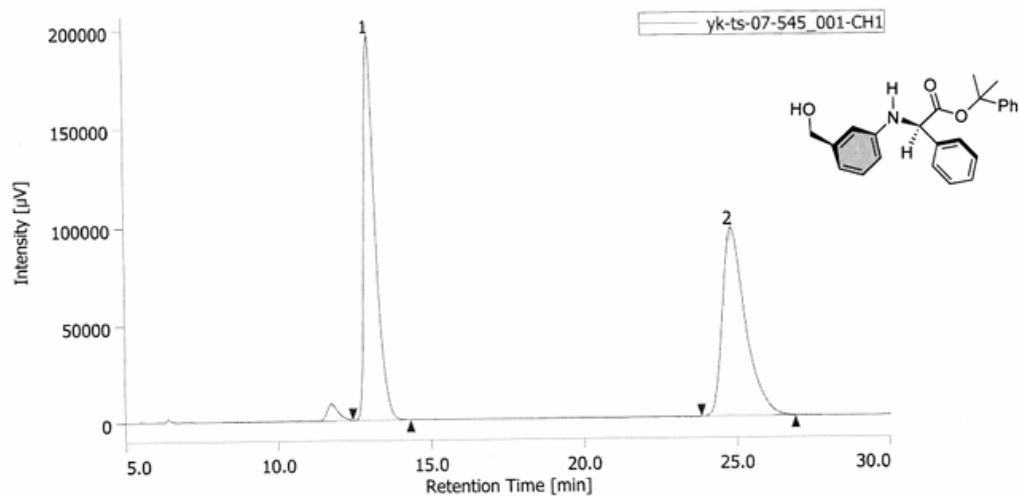

| # | tR [min] | Area [µV·sec] | Area%  | Height [µV] [µV] | Height% |
|---|----------|---------------|--------|------------------|---------|
| 1 | 13.017   | 5060966       | 50.050 | 196412           | 67.087  |
| 2 | 24.842   | 5050767       | 49.950 | 96359            | 32.913  |

0526 yk-ts-07-546\_001 2026/05/26 18:54:16

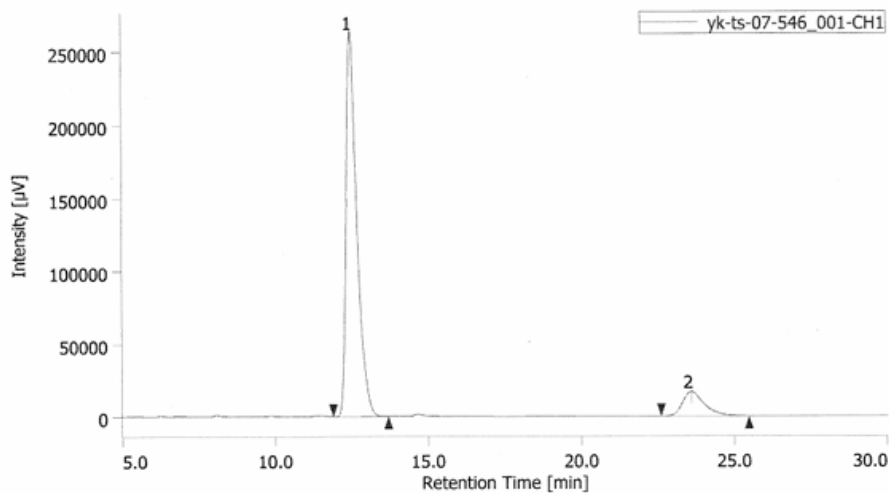

| # | tR [min] | Area [µV·sec] | Area%  | Height [µV] [µV] | Height% |
|---|----------|---------------|--------|------------------|---------|
| 1 | 12.483   | 6415270       | 88.918 | 263879           | 94.103  |
| 2 | 23.575   | 799548        | 11.082 | 16535            | 5.897   |

1  
2

1

9m

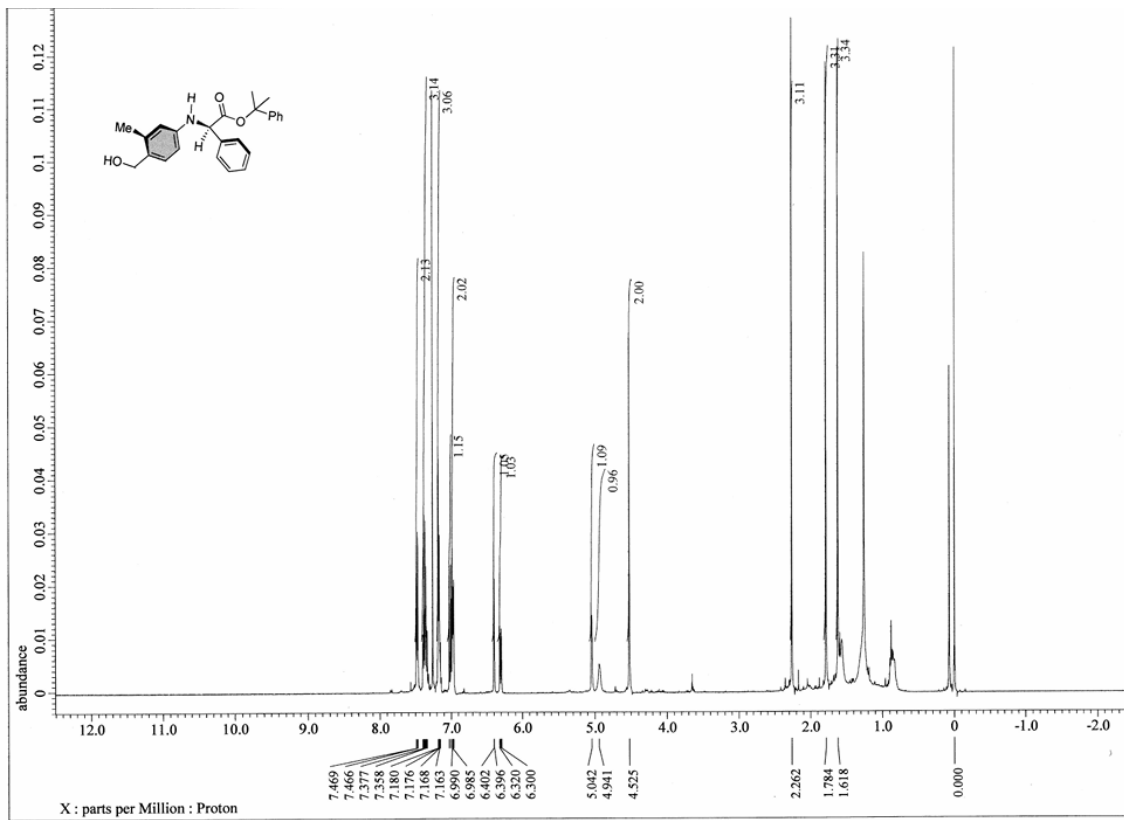

2

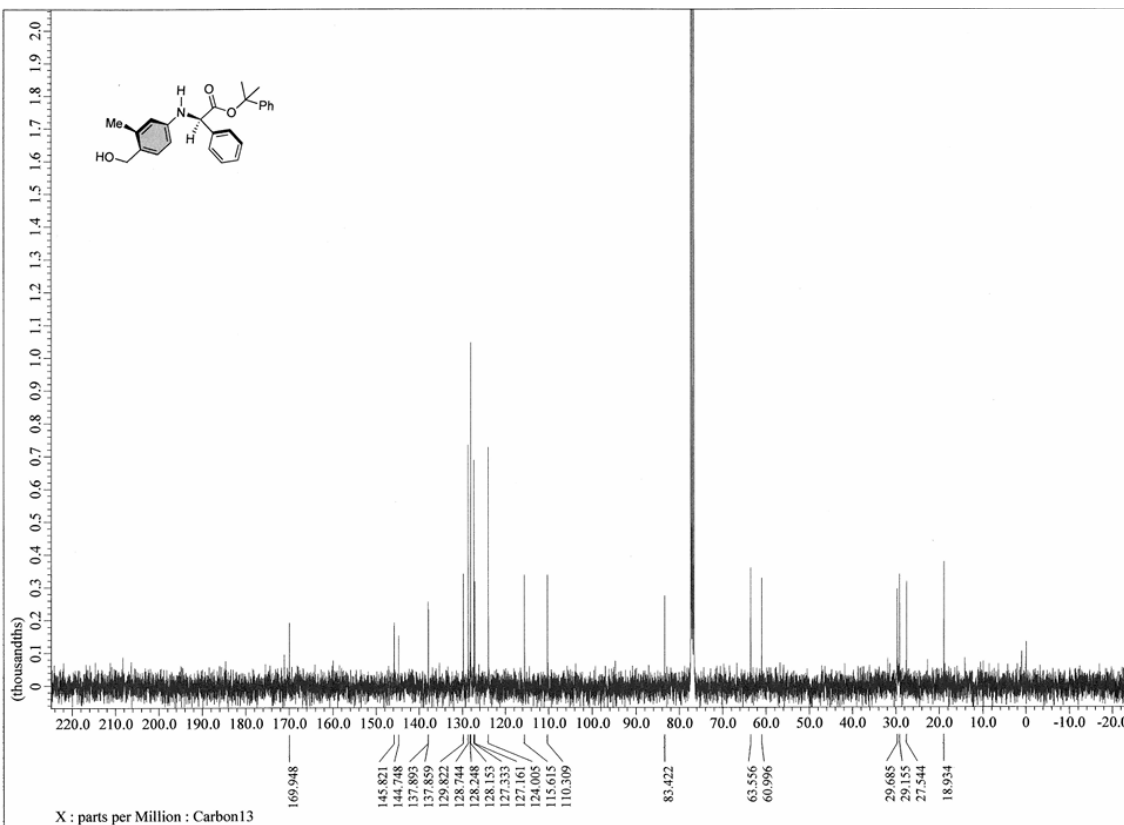

3

0120 yk-ts-06-433\_004 2026/04/09 17:39:47

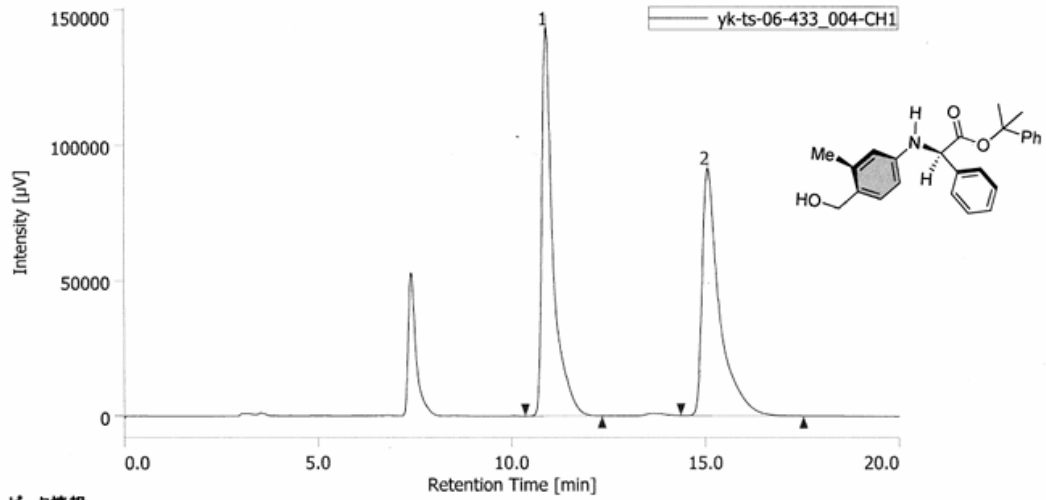

ピーク情報

| # | ピーク名    | CH | tR [min] | 面積 [μV·sec] | 高さ [μV] | 面積%    | 高さ%    | 定量値 | NTP  | 分離度   | シメトリー係数 | 警告 |
|---|---------|----|----------|-------------|---------|--------|--------|-----|------|-------|---------|----|
| 1 | Unknown | 1  | 10.900   | 2880324     | 143876  | 50.514 | 61.160 | N/A | 9674 | 7.382 | 2.008   |    |
| 2 | Unknown | 1  | 15.067   | 2821680     | 91368   | 49.486 | 38.840 | N/A | 7661 | N/A   | 2.187   |    |

0121 yk-ts-06-434\_001 2026/04/09 17:38:48

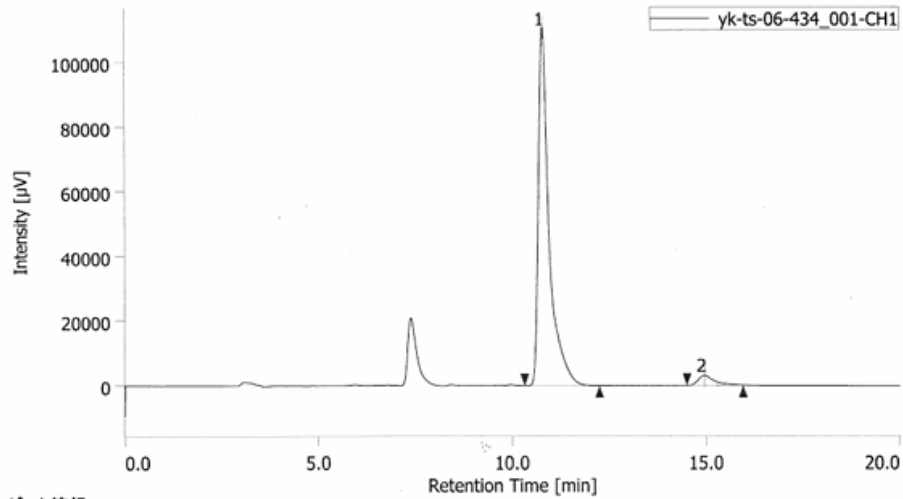

ピーク情報

| # | ピーク名    | CH | tR [min] | 面積 [μV·sec] | 高さ [μV] | 面積%    | 高さ%    | 定量値 | NTP  | 分離度   | シメトリー係数 | 警告 |
|---|---------|----|----------|-------------|---------|--------|--------|-----|------|-------|---------|----|
| 1 | Unknown | 1  | 10.783   | 2133586     | 110670  | 95.918 | 97.248 | N/A | 9988 | 7.442 | 2.031   |    |
| 2 | Unknown | 1  | 14.950   | 90807       | 3131    | 4.082  | 2.752  | N/A | 7487 | N/A   | 1.722   |    |

1  
2

1

9n

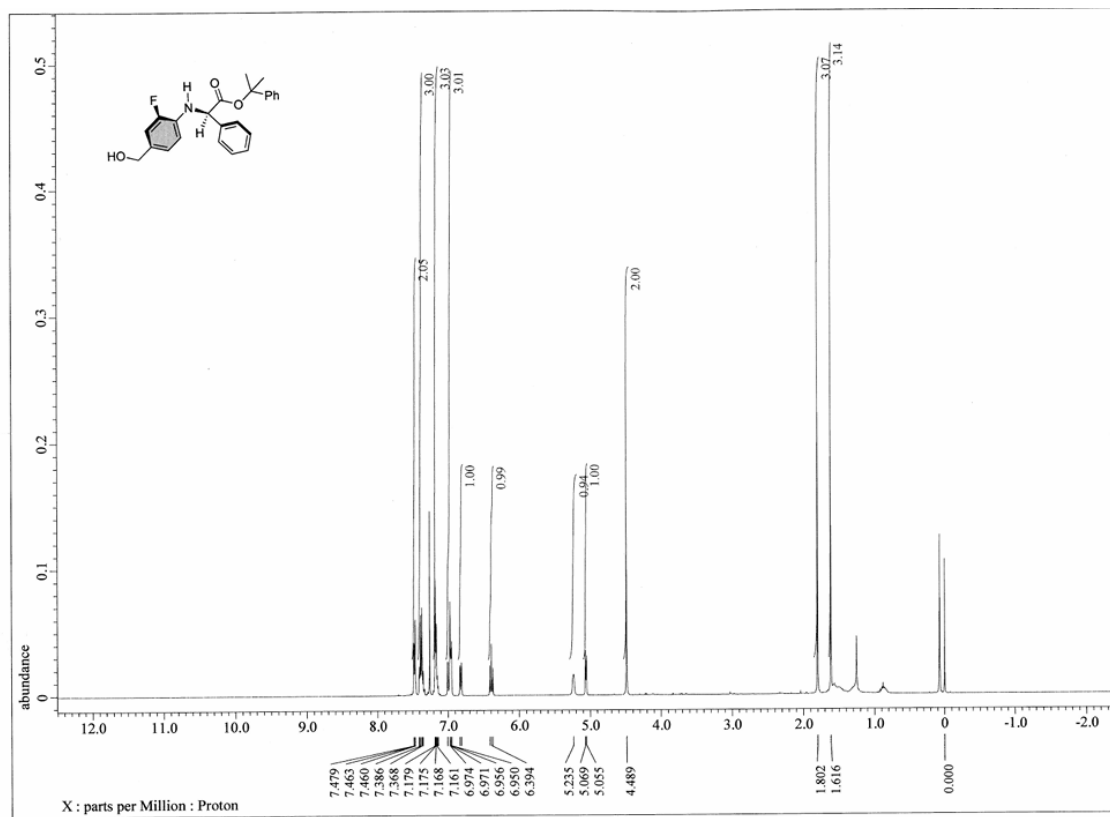

2

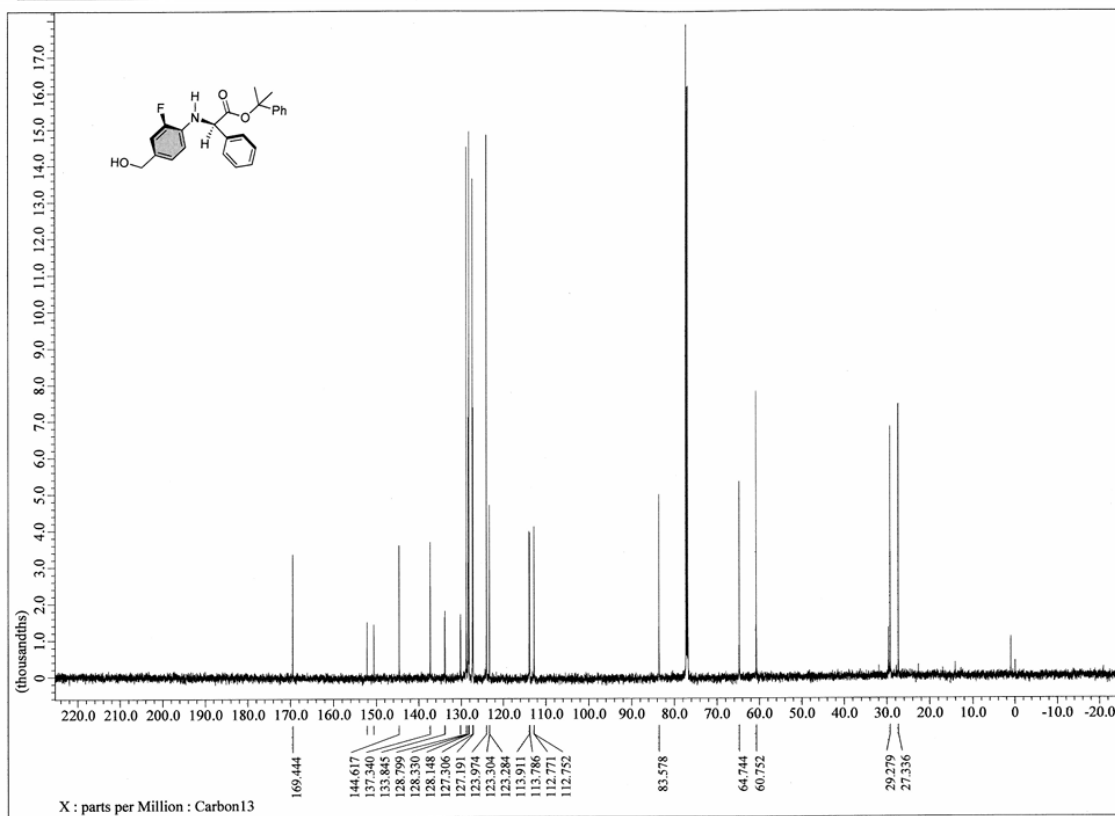

3

4

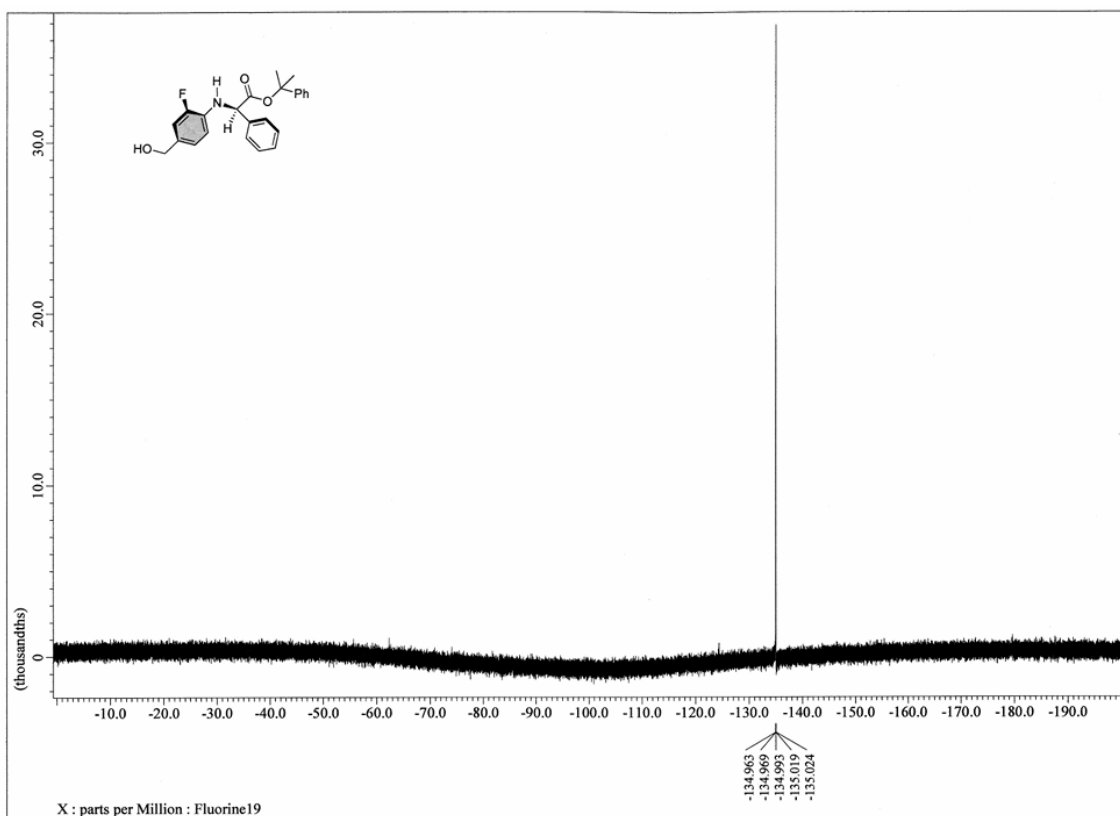

1  
2  
3

0207 yk-ts-06-448\_003 2026/06/05 17:35:19

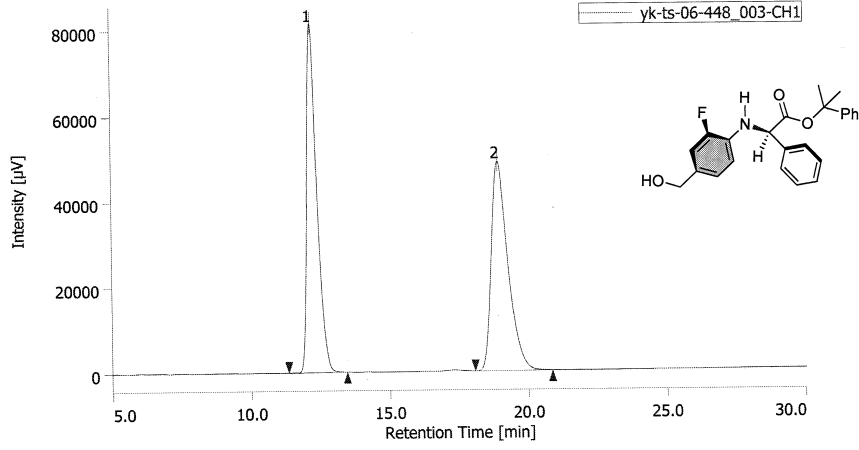

| # | tR [min] | Area [µV·sec] | Area%  | Height [µV] [µV] | Height% |
|---|----------|---------------|--------|------------------|---------|
| 1 | 12.225   | 2030847       | 50.039 | 81540            | 62.517  |
| 2 | 18.933   | 2027703       | 49.961 | 48889            | 37.483  |

0207 yk-ts-06-449\_004 2026/06/19 0:58:47

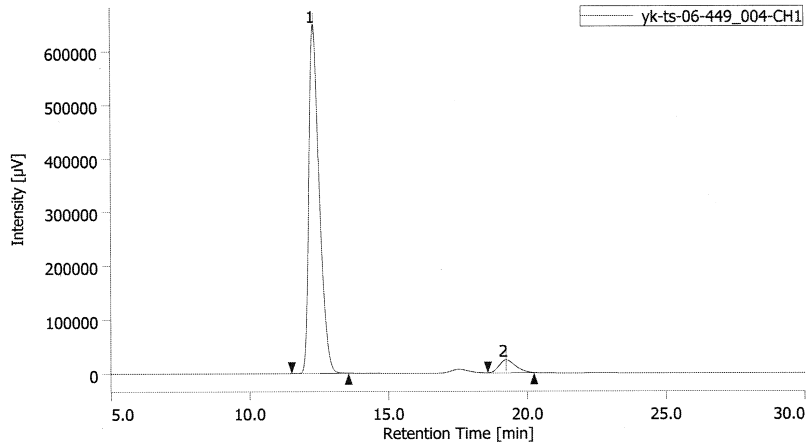

| # | tR [min] | Area [µV·sec] | Area%  | Height [µV] [µV] | Height% |
|---|----------|---------------|--------|------------------|---------|
| 1 | 12.317   | 16756793      | 94.598 | 649994           | 96.496  |
| 2 | 19.225   | 956944        | 5.402  | 23603            | 3.504   |

1  
2

1

2 **10. References**

- (1) Sietmann, J., Ong, M., Mück-Lichtenfeld, C., Daniliuc, C. G. & Wahl, J. M. Desymmetrization of prochiral cyclobutanones via nitrogen insertion: A concise route to chiral  $\gamma$ -lactams. *Angew. Chem. Int. Ed.* **60**, 9719–9723 (2021).  
<https://doi.org/10.1002/anie.202100642>
- (2) Jobin, S., Gagnon, D. & Lubell, W. D. Development of a solid-phase traceless-Ugi reaction as a novel backbone anchoring strategy for peptide synthesis. *Pept. Sci.* **111**, e24044 (2019).  
<https://doi.org/10.1002/pep2.24044>
- (3) Li, M.-L., Yu, J.-H., Li, Y.-H., Zhu, S.-F. & Zhou, Q.-L. Highly enantioselective carbene insertion into N–H bonds of aliphatic amines. *Science* **366**, 990–994 (2019).  
<https://doi.org/10.1126/science.aaw9939>
- (4) Becke, A. D. Density-functional exchange-energy approximation with correct asymptotic behavior. *Phys. Rev. A* **38**, 3098–3100 (1988).  
<https://doi.org/10.1103/PhysRevA.38.3098>
- (5) Gaussian 16, Revision C.01, M. J. Frisch, G. W. Trucks, H. B. Schlegel, G. E. Scuseria, M. A. Robb, J. R. Cheeseman, G. Scalmani, V. Barone, G. A. Petersson, H. Nakatsuji, X. Li, M. Caricato, A. V. Marenich, J. Bloino, B. G. Janesko, R. Gomperts, B. Mennucci, H. P. Hratchian, J. V. Ortiz, A. F. Izmaylov, J. L. Sonnenberg, D. Williams-Young, F. Ding, F. Lipparini, F. Egidi, J. Goings, B. Peng, A. Petrone, T. Henderson, D. Ranasinghe, V. G. Zakrzewski, J. Gao, N.

Rega, G. Zheng, W. Liang, M. Hada, M. Ehara, K. Toyota, R. Fukuda, J. Hasegawa, M. Ishida, T. Nakajima, Y. Honda, O. Kitao, H. Nakai, T. Vreven, K. Throssell, J. A. Montgomery, Jr., J. E. Peralta, F. Ogliaro, M. J. Bearpark, J. J. Heyd, E. N. Brothers, K. N. Kudin, V. N. Staroverov, T. A. Keith, R. Kobayashi, J. Normand, K. Raghavachari, A. P. Rendell, J. C. Burant, S. S. Iyengar, J. Tomasi, M. Cossi, J. M. Millam, M. Klene, C. Adamo, R. Cammi, J. W. Ochterski, R. L. Martin, K. Morokuma, O. Farkas, J. B. Foresman, and D. J. Fox, Gaussian, Inc., Wallingford CT, (2016).

- (6) Fukui, K. The path of chemical reactions: the IRC approach. *Acc. Chem. Res.* **14**, 363–368 (1981).

<https://doi.org/10.1021/ar00072a001>

- (7) Zhao, Y. & Truhlar, D. G. Exploring the limit of accuracy of the global hybrid meta density functional for main-group thermochemistry, kinetics, and noncovalent interactions. *J. Chem. Theory Comput.* **4**, 1849–1868 (2008).

<https://doi.org/10.1021/ct800246v>

- (8) Humphrey, W., Dalke, A. & Schulten, K. VMD: Visual molecular dynamics. *J. Mol. Graphics* **14**, 33–38 (1996).

[https://doi.org/10.1016/0263-7855\(96\)00018-5](https://doi.org/10.1016/0263-7855(96)00018-5)

- (9) Falivene, L., Cao, Z., Petta, A., Serra, L., Poater, A., Oliva, R., Scarano, V. & Cavallo, L. Towards the online computer-aided design of catalytic pockets. *Nat. Chem.* **11**, 872–879 (2019).

<https://doi.org/10.1038/s41557-019-0319-5>

(10) The Avogadro software is available free of charge from the following website:

<https://avogadro.cc/install/>
